# Supplementary material for: USP30 sets a trigger threshold for PINK1–PARKIN amplification of mitochondrial ubiquitylation
Source: PubMed Central journal article supplement (PMC7362391; doi:10.26508/lsa.202000768), 2020-07-07

Source Data Figure 3A

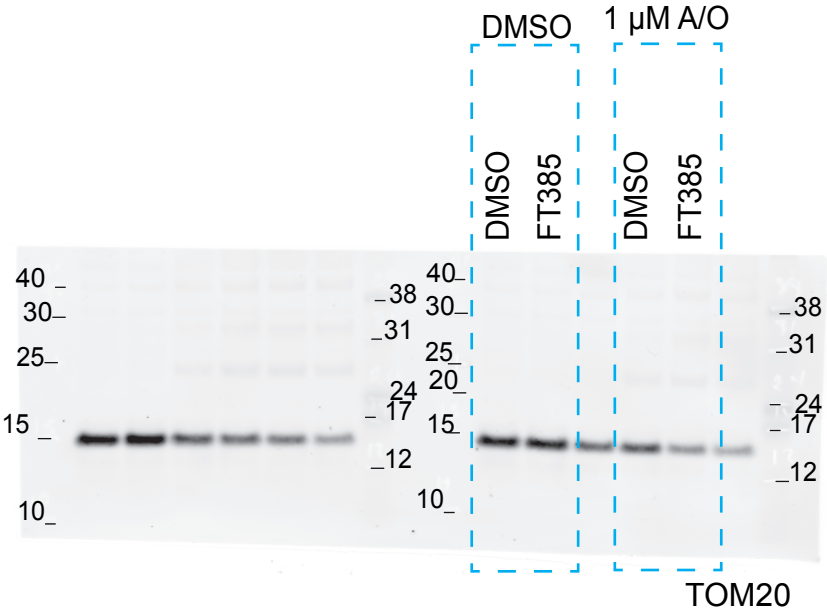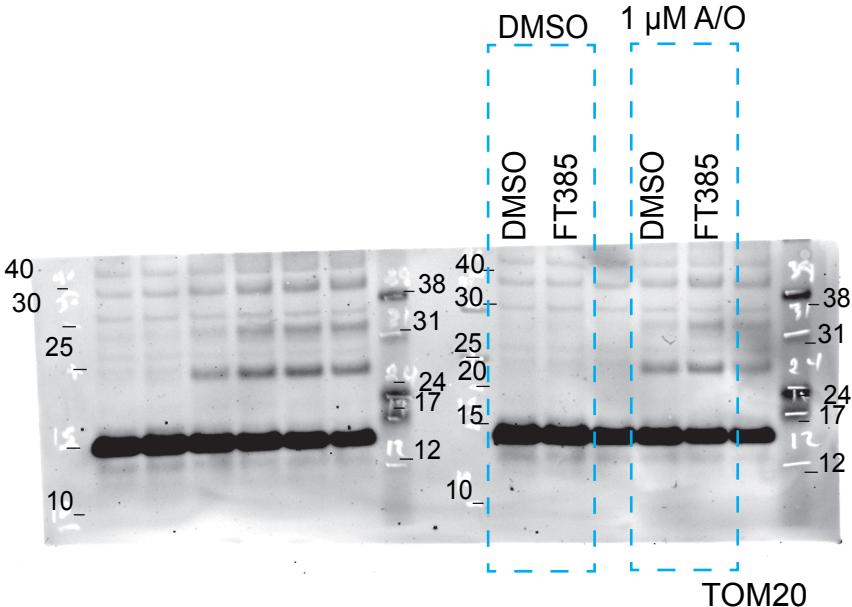

# Source Data Figure 3A Cont.

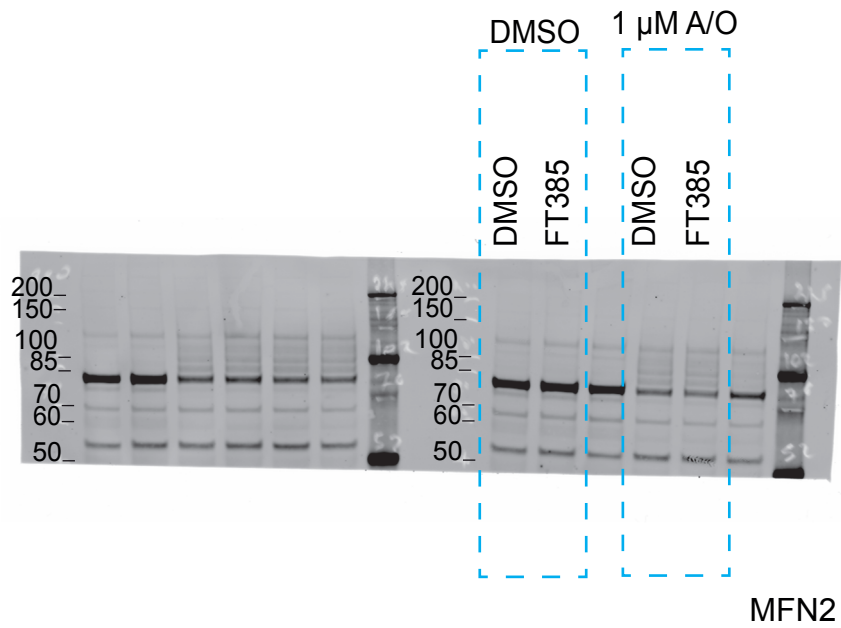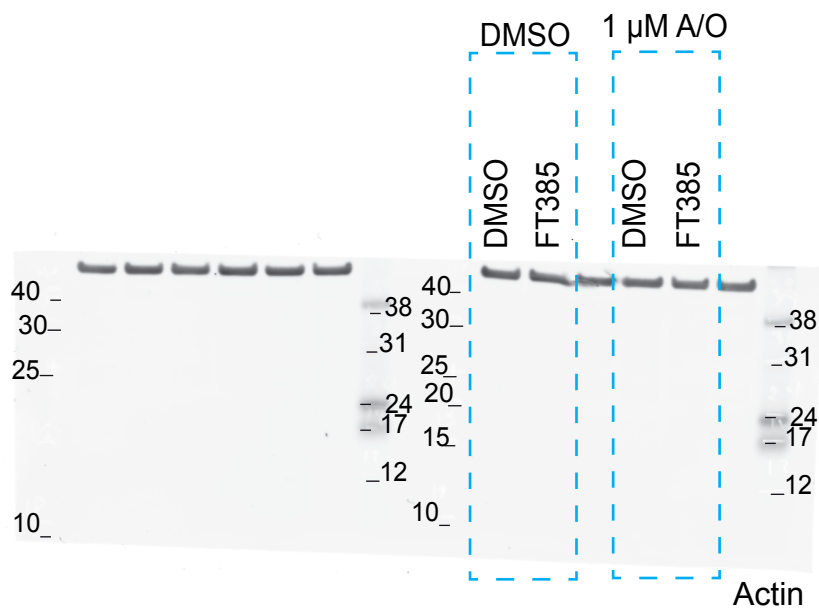

# Source Data Figure 3A Cont.

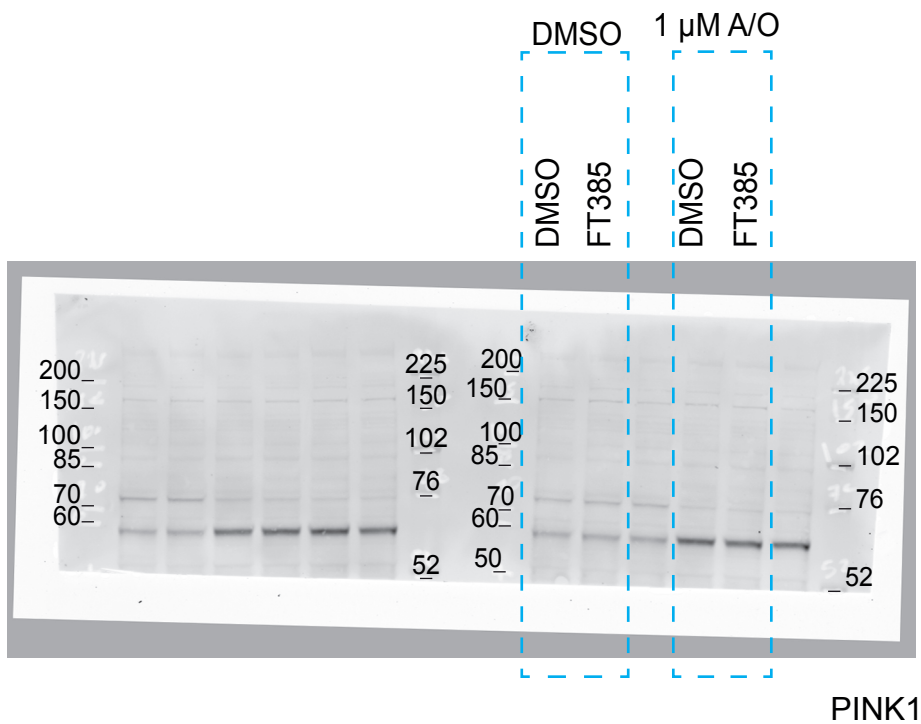

PINK1

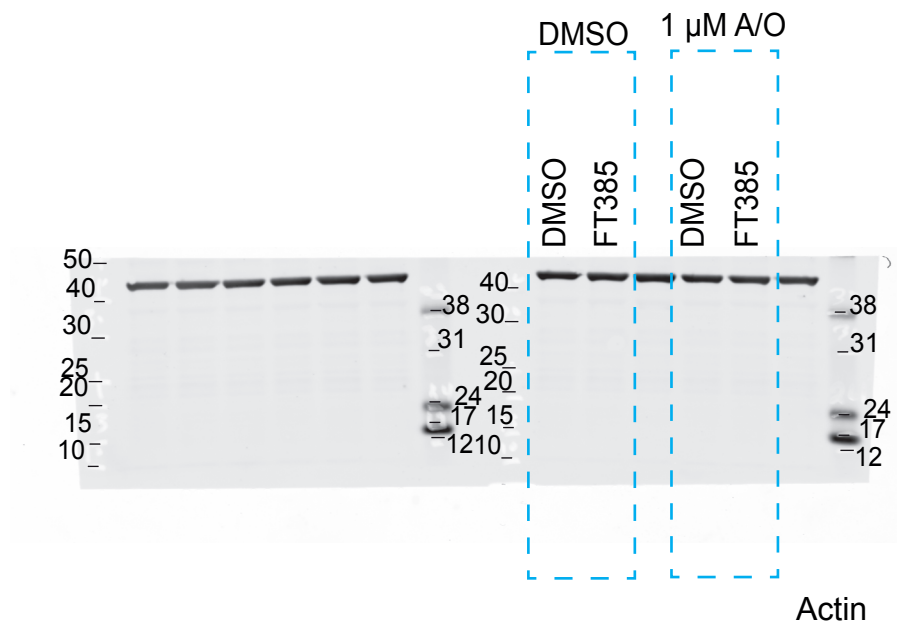

Actin

# Source Data Figure 3B

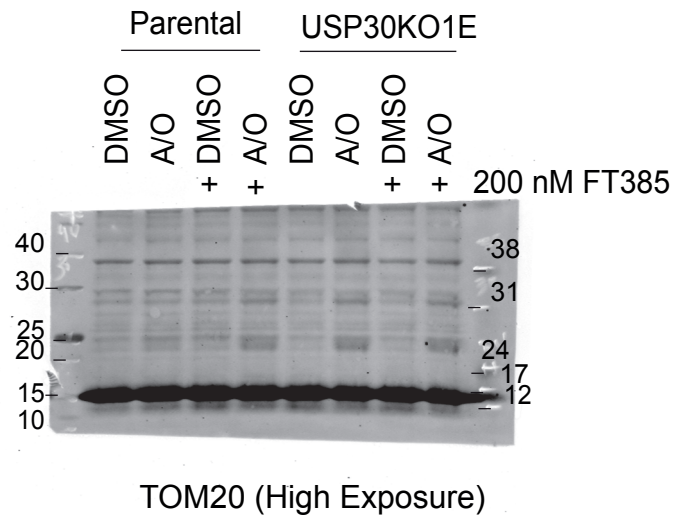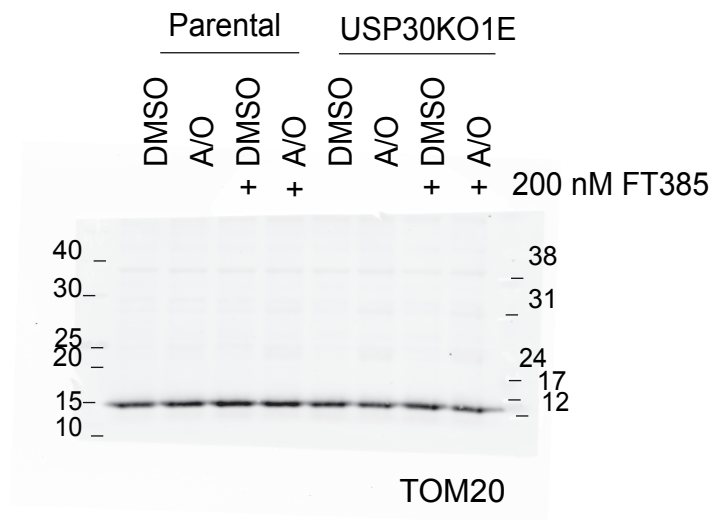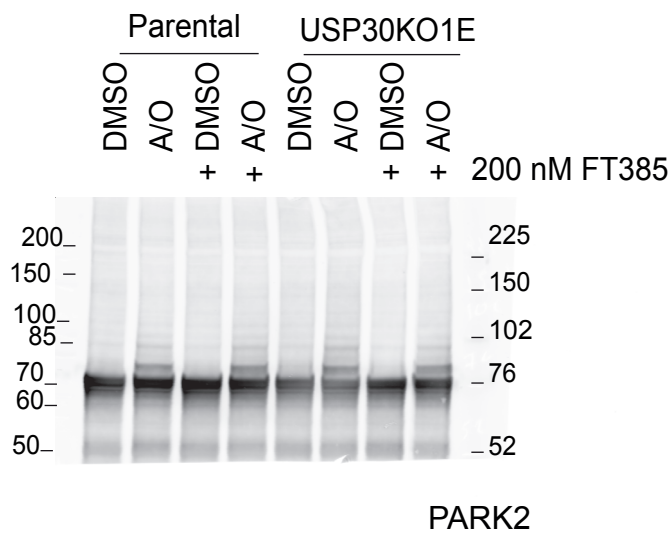

# Source Data Figure 3B Cont.

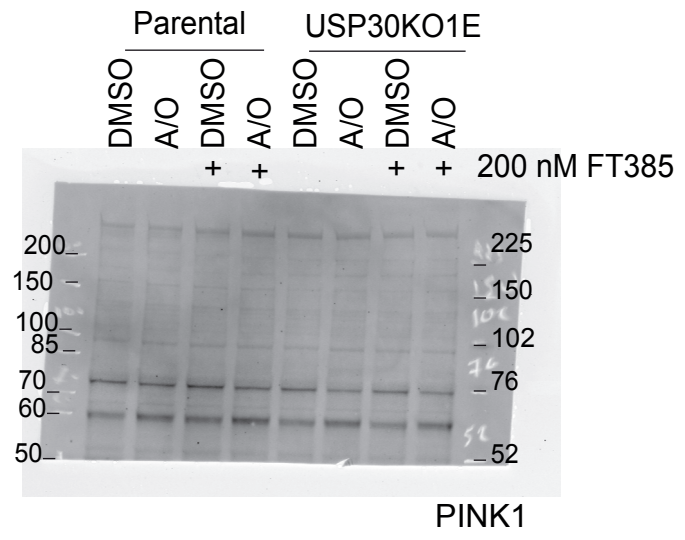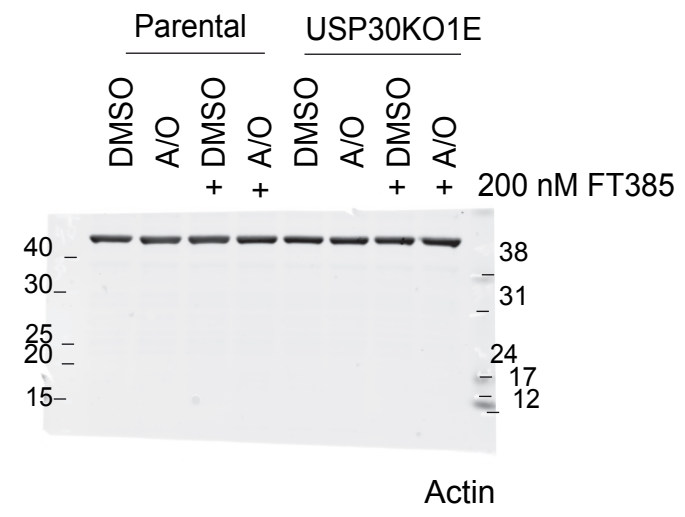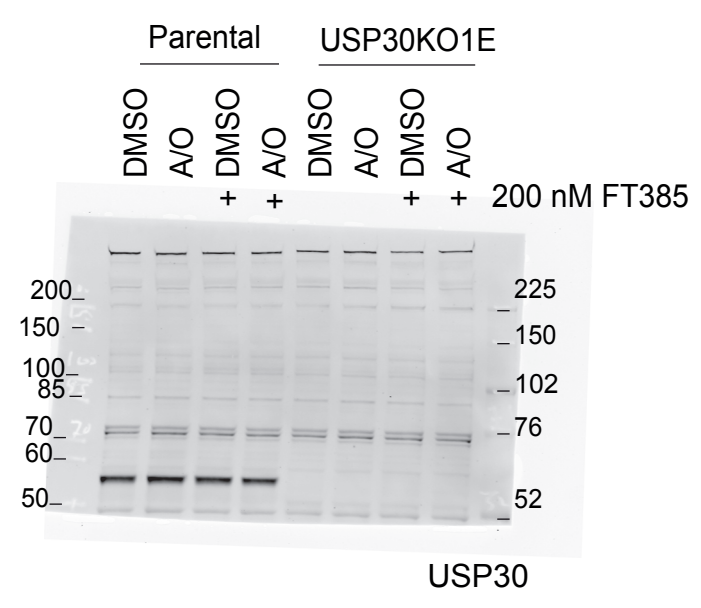

# Source Data Figure 3C

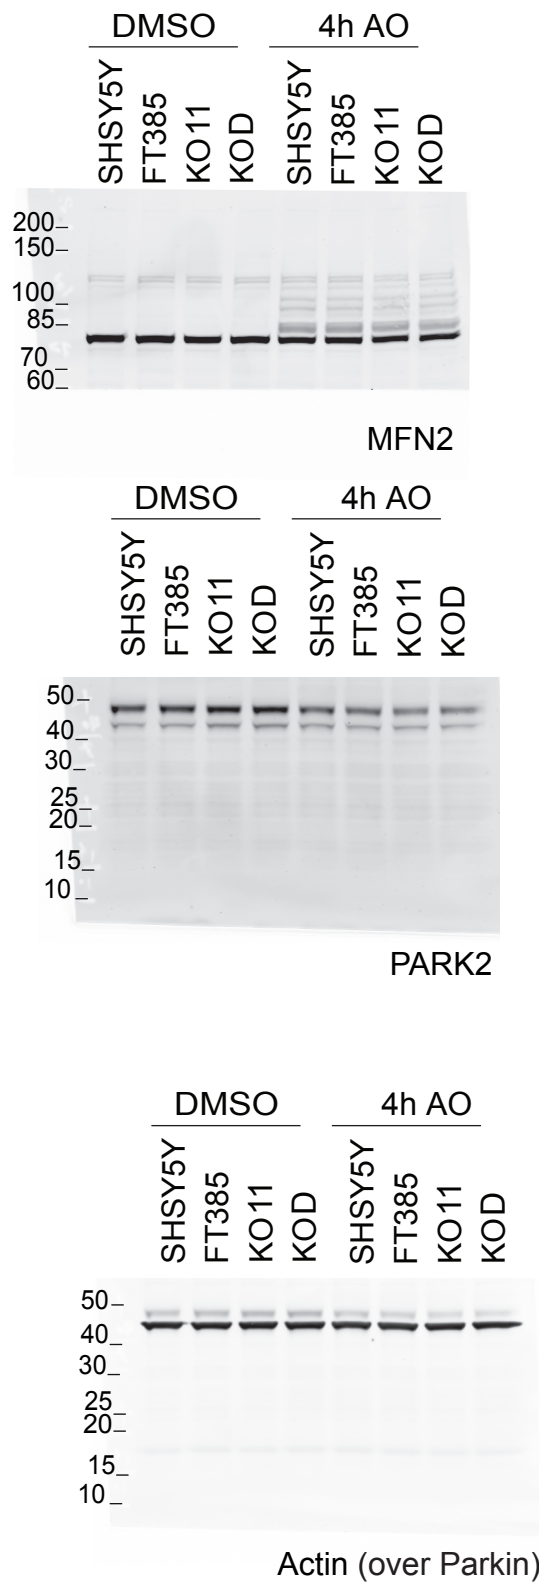

Source Data Figure 3C Cont.

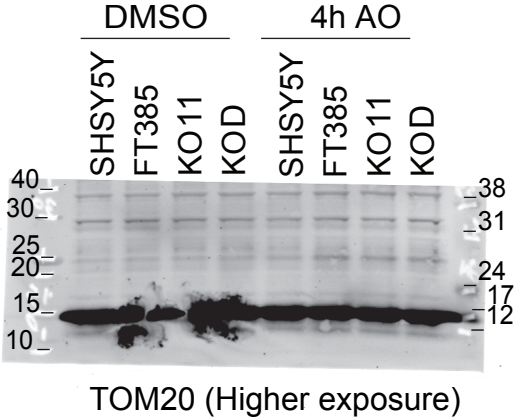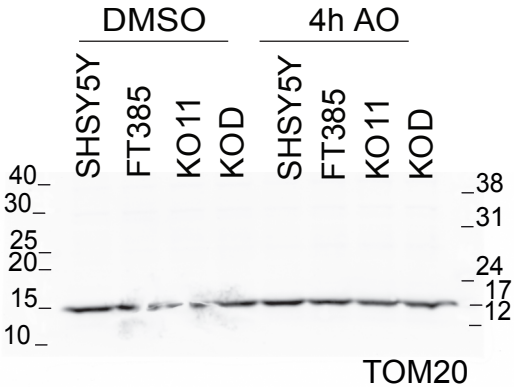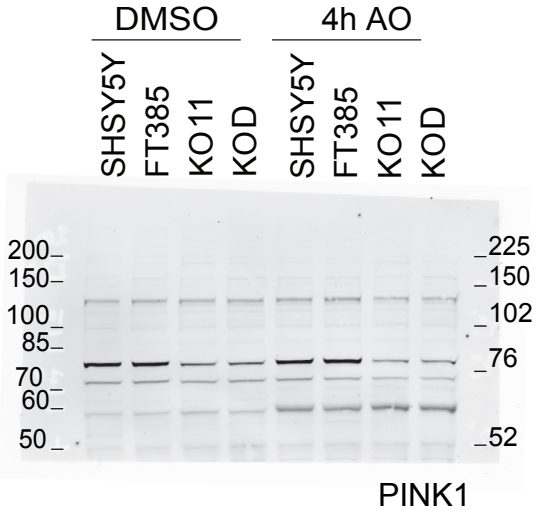

Source Data Figure 3C Cont.

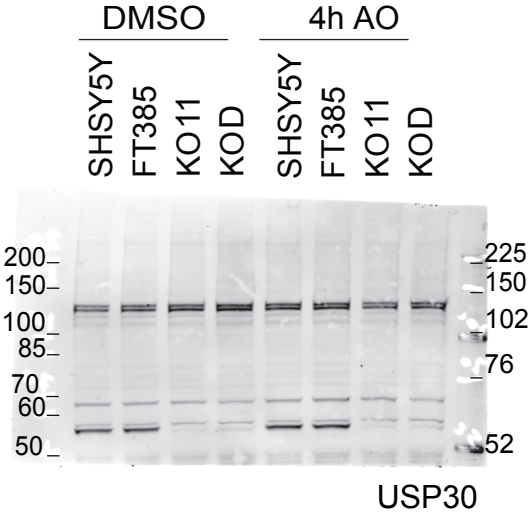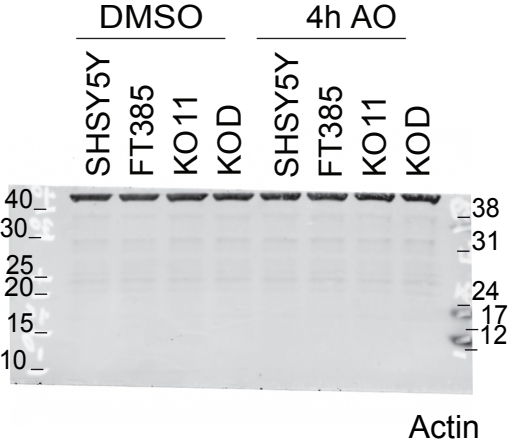



# Source Data Figure 3D

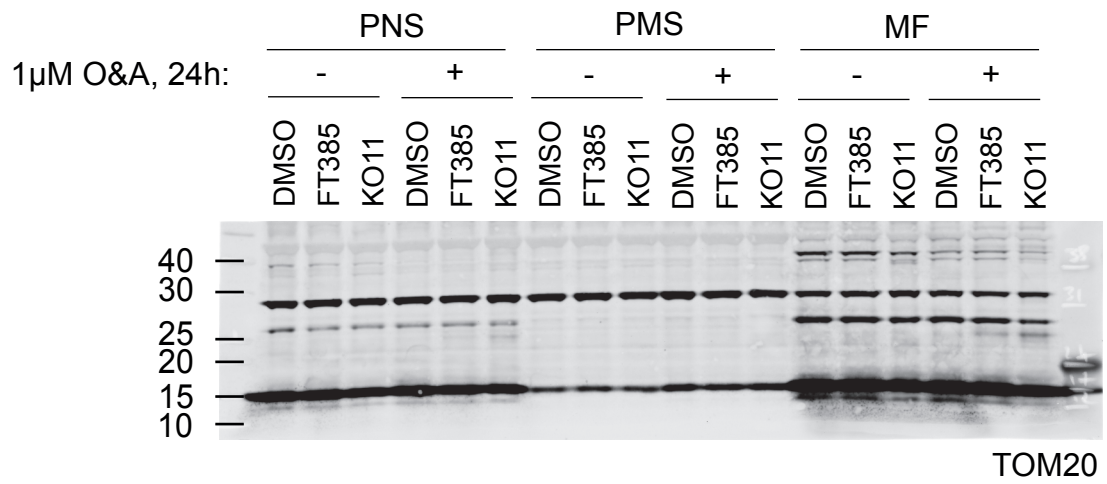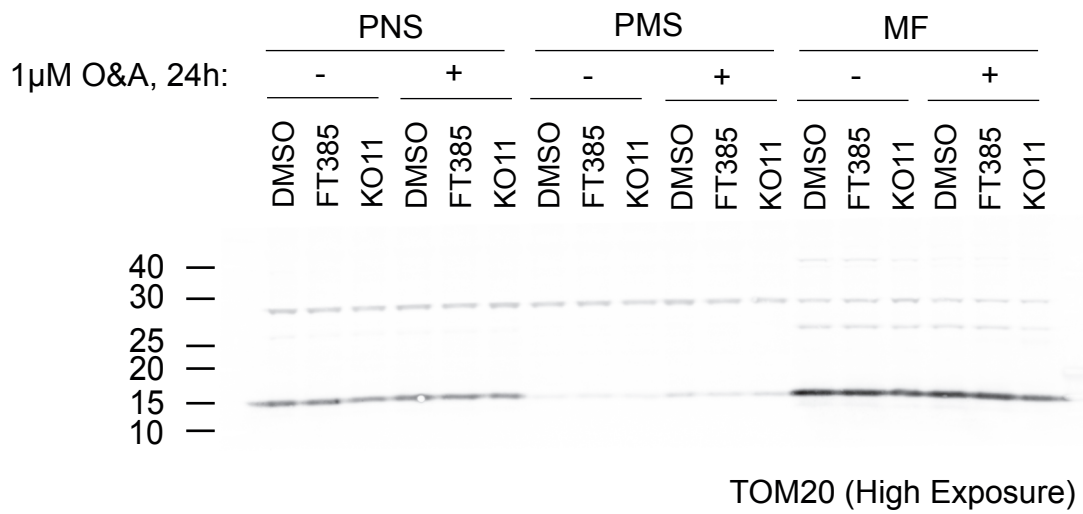

# Source Data Figure 3D Cont.

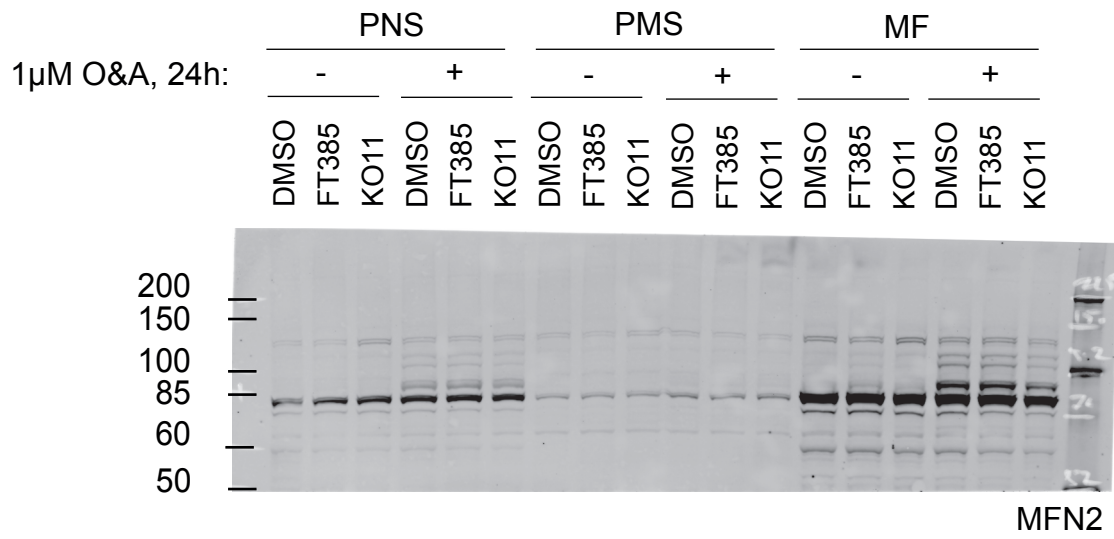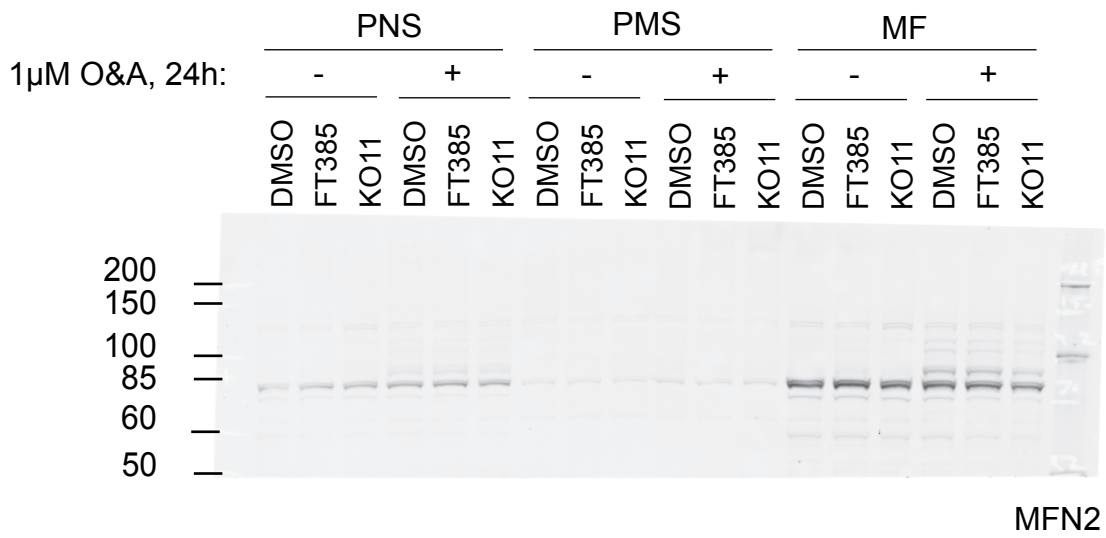

Supplement: LSA-2020-00768_SdataF3.1.pdf [file LSA-2020-00768_SdataF3.1.pdf]
