# Supplementary material for: USP30 sets a trigger threshold for PINK1–PARKIN amplification of mitochondrial ubiquitylation
Source: PubMed Central journal article supplement (PMC7362391; doi:10.26508/lsa.202000768), 2020-07-07

# Source Data Figure 6A

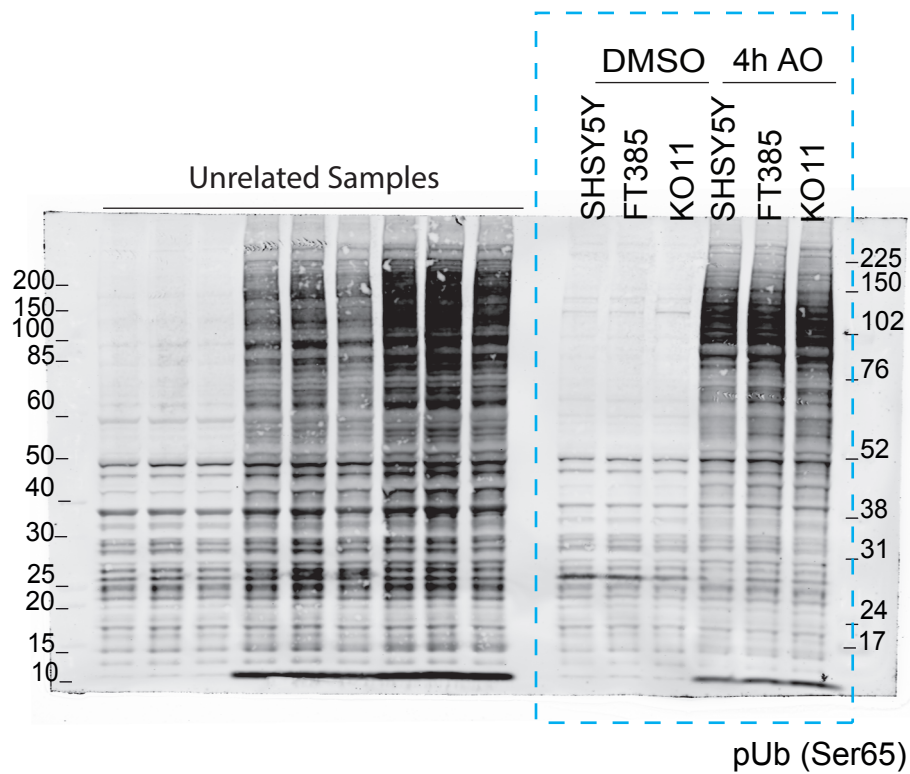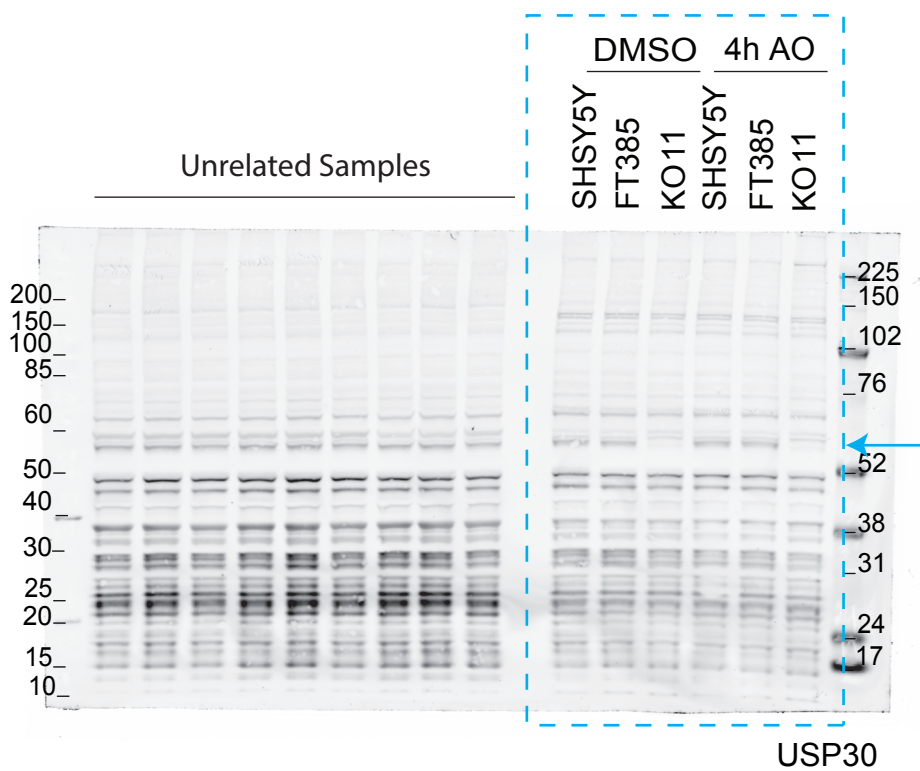

Source Data Figure 6A Cont.

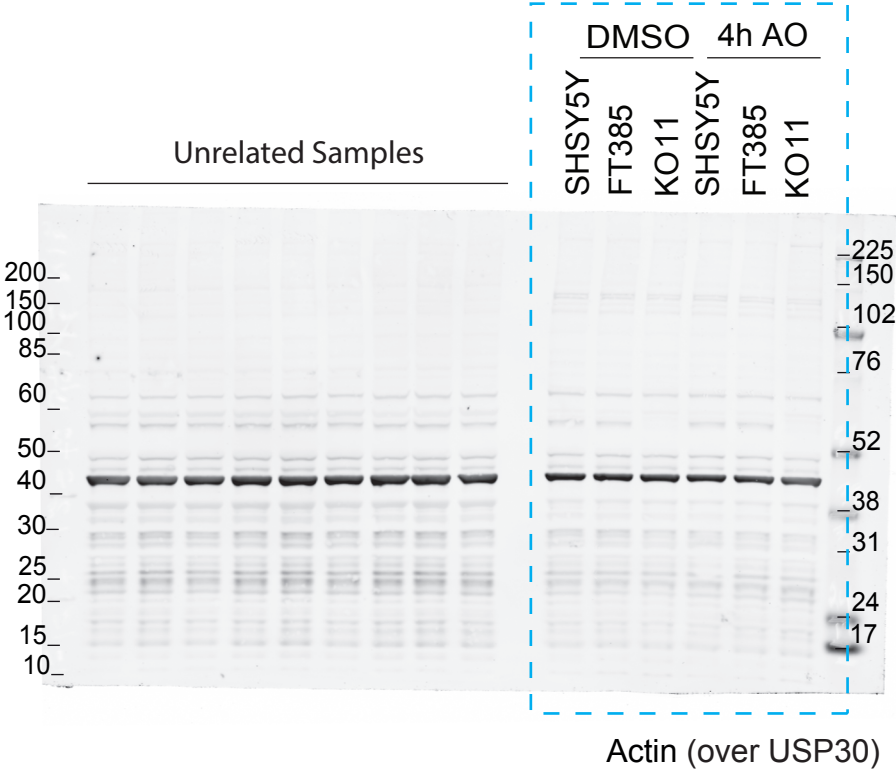

Source Data Figure 6A Cont.

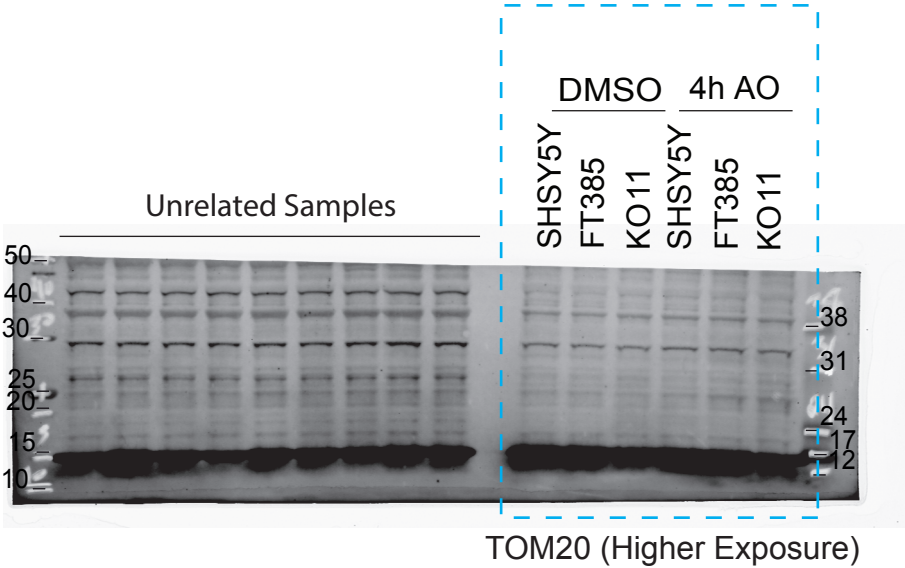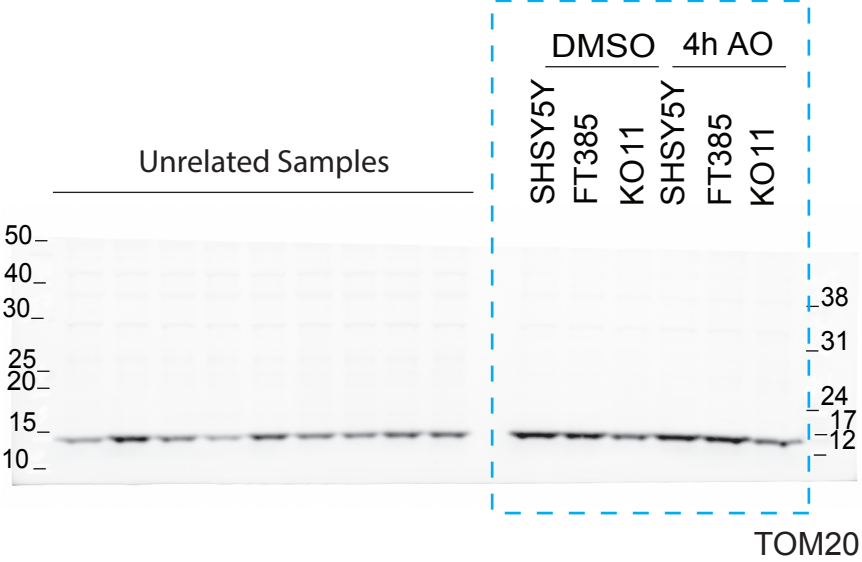

# Source Data Figure 6A Cont.

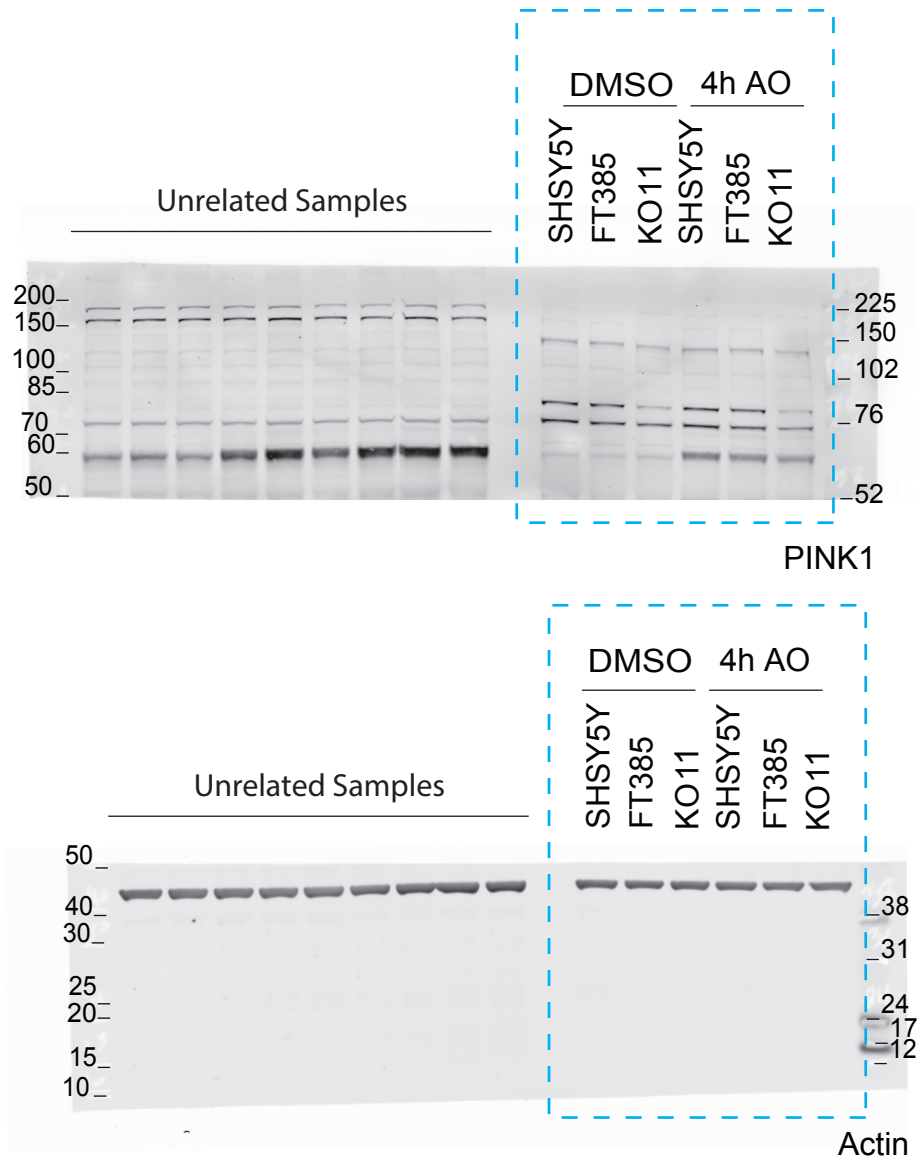

# Source Data Figure 6C

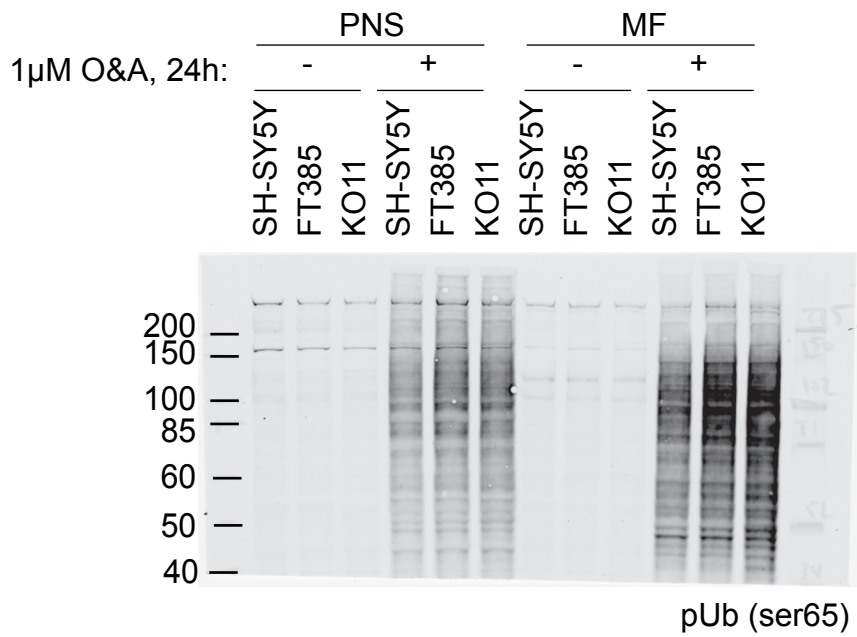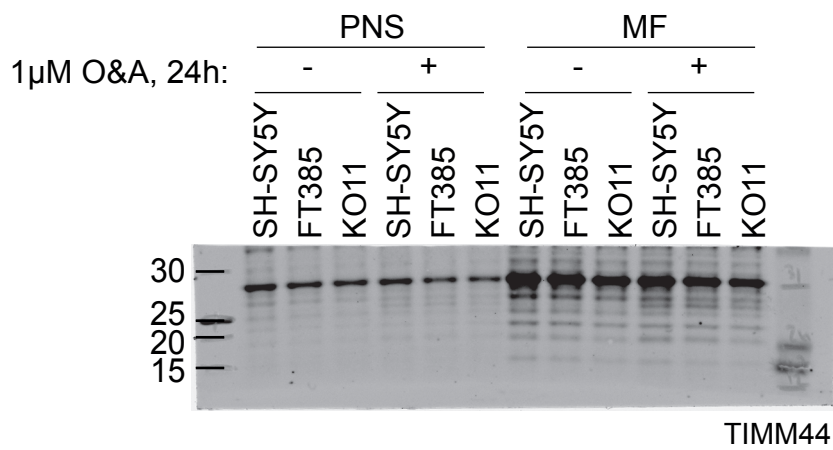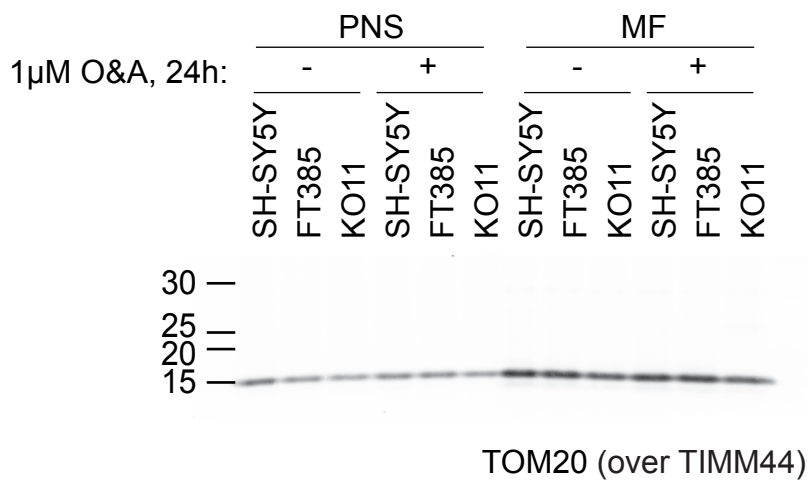

# Source Data Figure 6C Cont.

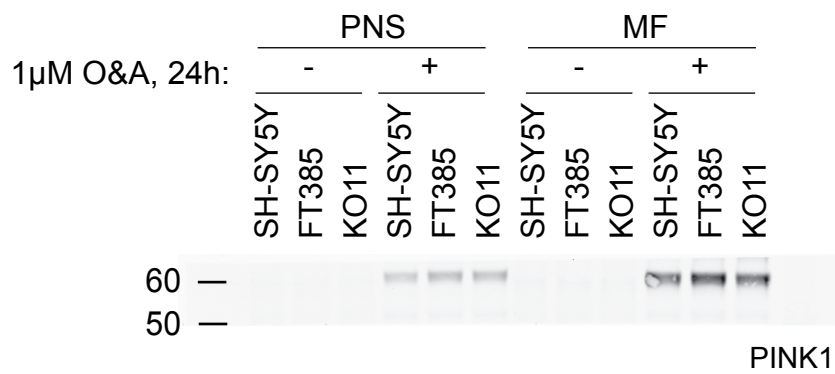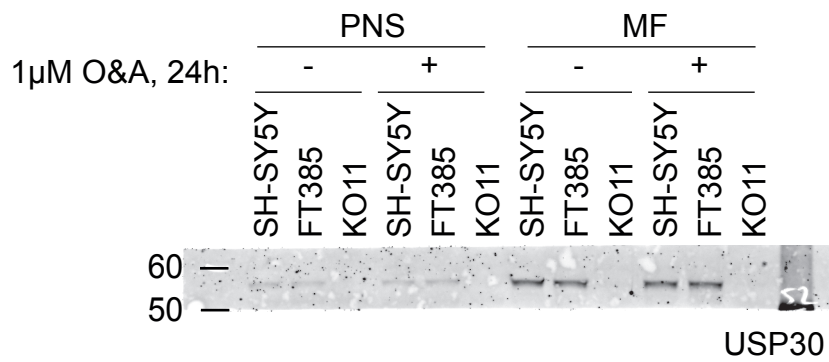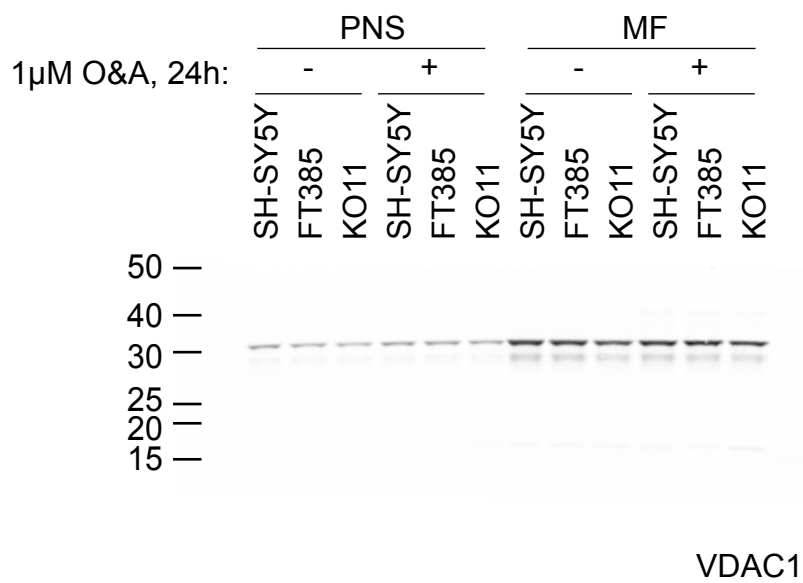

# Source Data Figure 6D

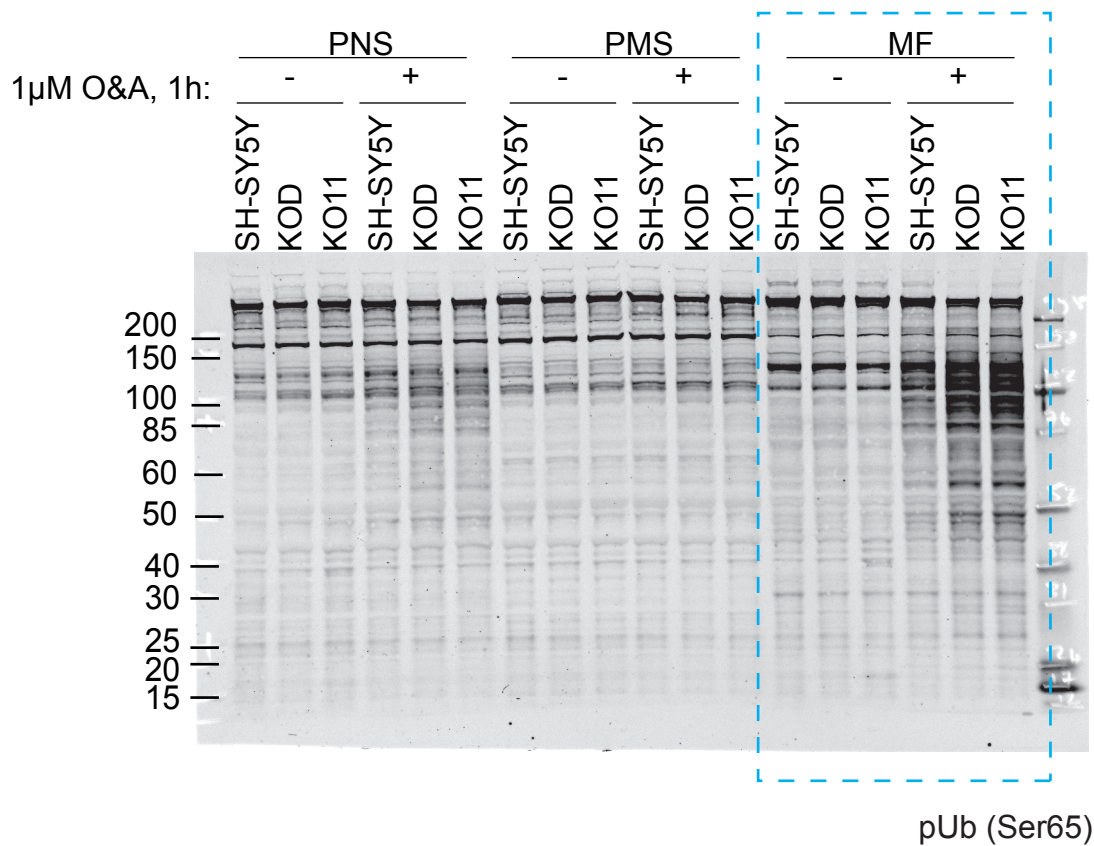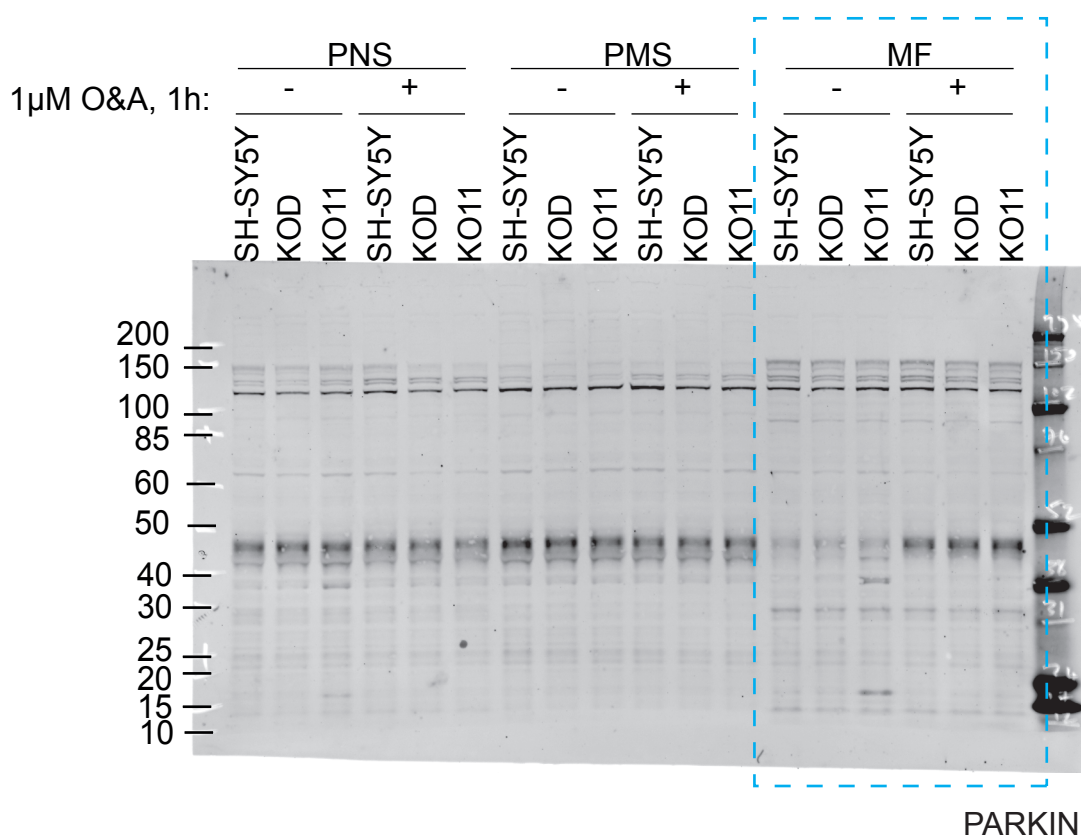

Source Data Figure 6D Cont.

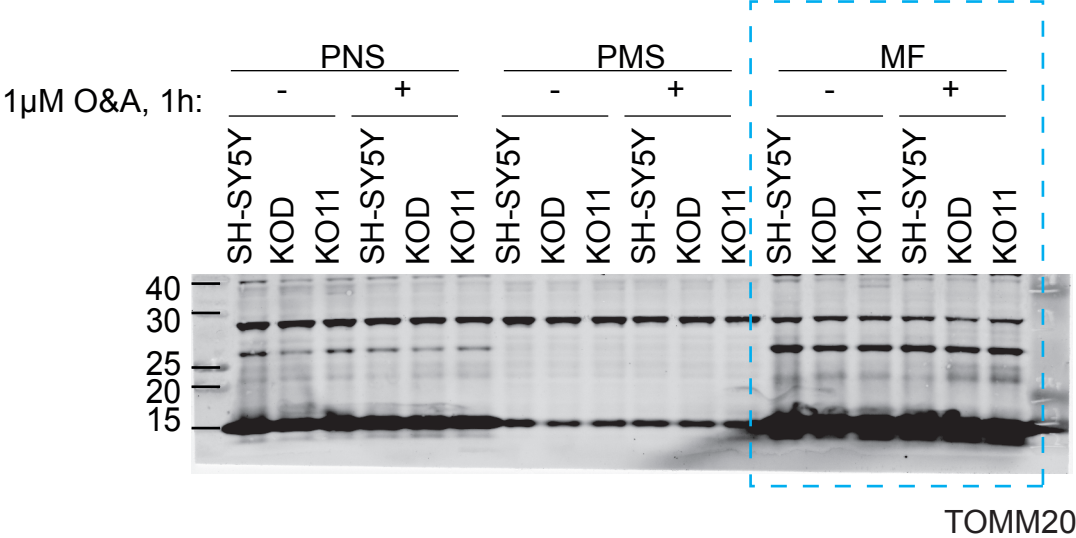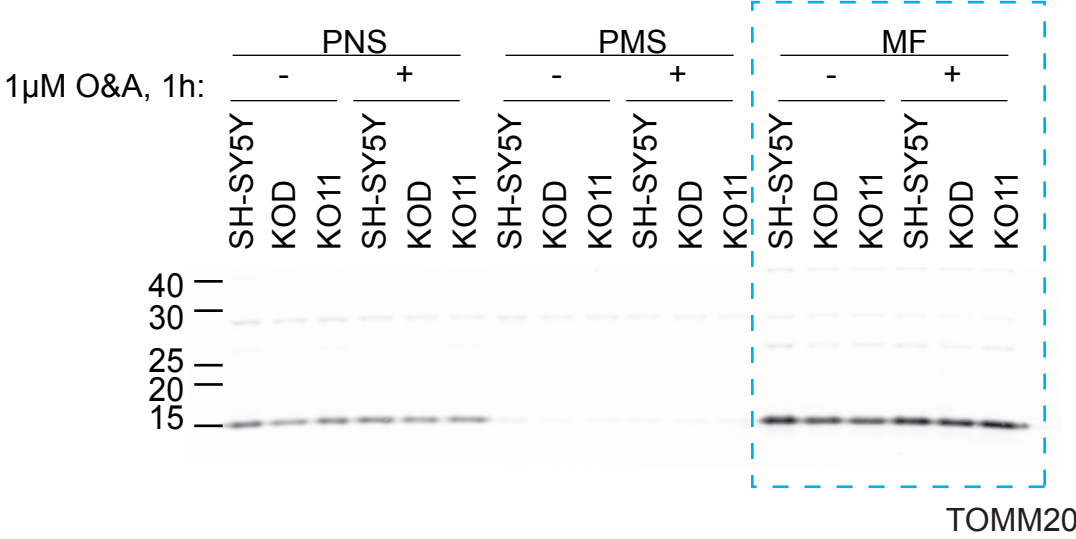



# Source Data Figure 6D Cont.

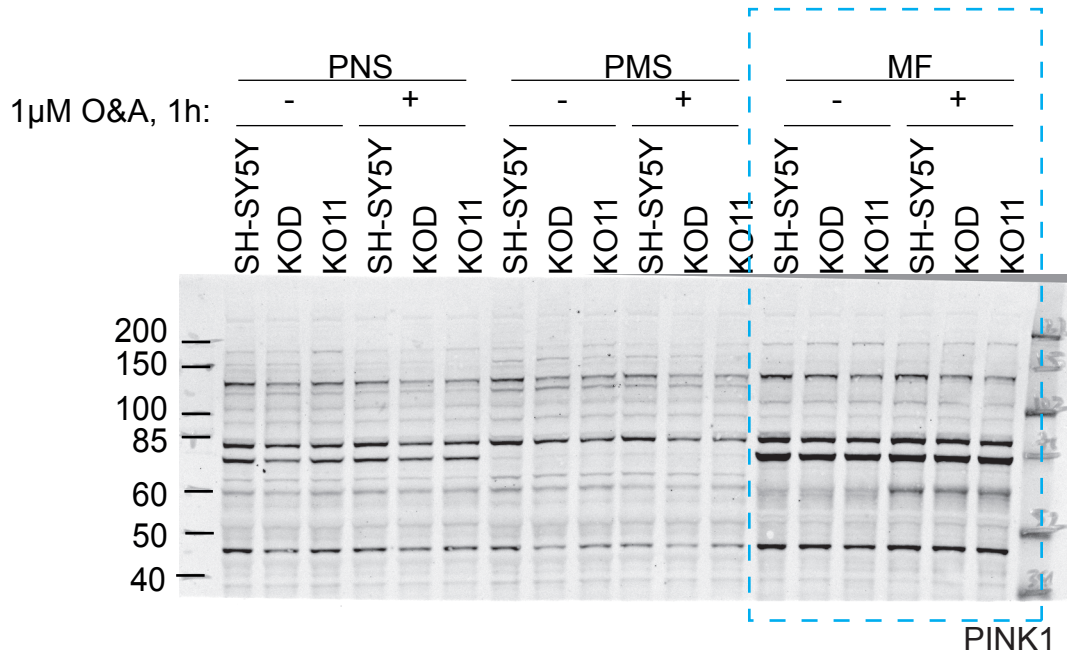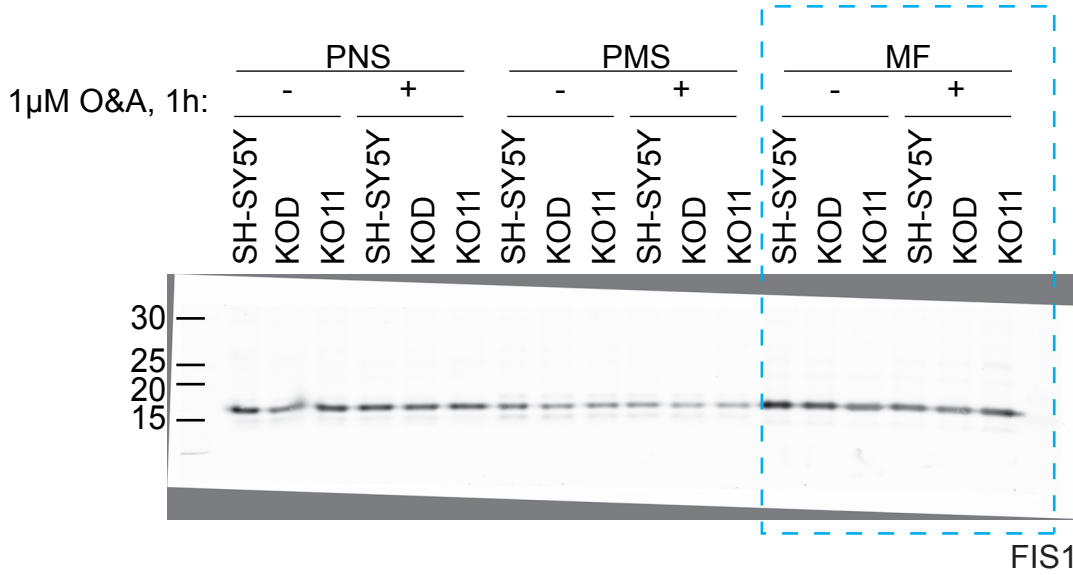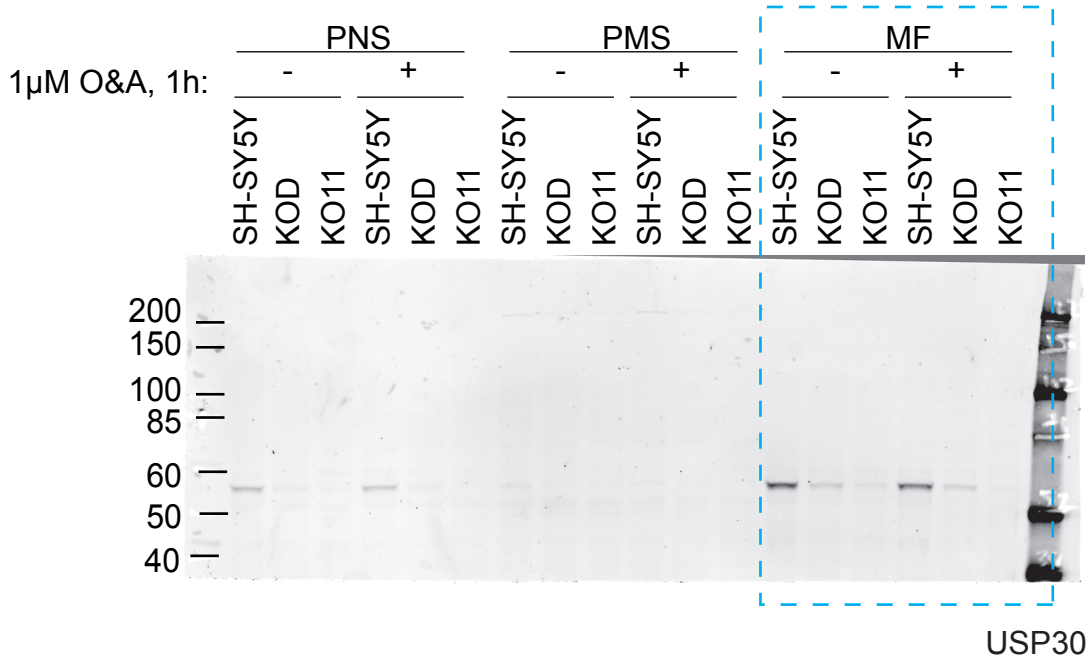

Supplement: LSA-2020-00768_SdataF6.1.pdf [file LSA-2020-00768_SdataF6.1.pdf]
