# Supplementary material for: USP30 sets a trigger threshold for PINK1–PARKIN amplification of mitochondrial ubiquitylation
Source: Life Sci Alliance. 2020 Jul 7;3(8):e202000768. doi: 10.26508/lsa.202000768 (PMC7362391; doi:10.26508/lsa.202000768)
Supplement: Supplementary file 4 [file LSA-2020-00768_SdataF3.2.xlsx]

## Sheet: 3C
Quantitation Ub-TOM20
	Exp#1:
	Ub-TOM20
	Image Name	Channel	Name	Signal	Total	Area	Bkgnd.	Type		Condition	Ub-TOM20/TOM20	x1000
SHSY5Y AO	0006356_01	800	13	115	2600	1072	2.32	Signal		SHSY5Y AO	0.00201401	2.01401
FT385 AO	0006356_01	800	14	327	3170	1170	2.43	Signal		FT385 AO	0.00562823	5.62823
KO11 AO	0006356_01	800	15	265	2690	930	2.6	Signal		KO11 AO	0.00697368	6.97368
	TOM20
	Image Name	Channel	Name	Signal	Total	Area	Bkgnd.	Type
SHSY5Y AO	0006356_01	800	4	57100	66500	1564	6.01	Signal
FT385 AO	0006356_01	800	5	58100	68100	1564	6.37	Signal
KO11 AO	0006356_01	800	6	38000	47500	1840	5.17	Signal
	Exp#2:
	Ub-TOM20
	Image Name	Channel	Name	Signal	Total	Area	Bkgnd.	Type		Condition	Ub-TOM20/TOM20	x1000
SHSY5Y AO	0006795_01	800	9	76.5	1150	1005	1.07	Signal		SHSY5Y AO	0.00296512	2.96512
FT385 AO	0006795_01	800	10	140	1250	976	1.14	Signal		FT385 AO	0.00625	6.25
KO11 AO	0006795_01	800	11	129	1340	1105	1.1	Signal		KO11 AO	0.00651515	6.51515
KOD AO	0006795_01	800	12	161	1570	1320	1.07	Signal		KOD AO	0.00759434	7.59434
	TOM20
	Image Name	Channel	Name	Signal	Total	Area	Bkgnd.	Type
SHSY5Y AO	0006795_01	800	5	25800	29000	1794	1.76	Signal
FT385 AO	0006795_01	800	6	22400	25500	1794	1.73	Signal
KO11 AO	0006795_01	800	7	19800	22800	1794	1.67	Signal
KOD AO	0006795_01	800	8	21200	24000	1794	1.59	Signal

## Sheet: 3D
Quantitation Ub-TOM20
		Ub-TOM20
		Image Name	Channel	Name	Signal	Total	Area	Bkgnd.	Type				Ub-TOM20	TOM20	Ub-TOM20/TOM20	x1000
DMSO	SH	0000080_01	800	1	62.7	1490	912	1.56	Signal		DMSO	SH	62.7	113000	0.000554867	0.554867
	FT385	0000080_01	800	2	121	1550	912	1.57	Signal			FT385	121	105000	0.00115238	1.15238
	KO11	0000080_01	800	3	108	1410	912	1.43	Signal			KO11	108	83200	0.00129808	1.29808
24h AO	SH	0000080_01	800	4	218	1480	912	1.38	Signal		24h AO	SH	218	102000	0.00213725	2.13725
	FT385	0000080_01	800	5	455	2020	912	1.71	Signal			FT385	455	97200	0.00468107	4.68107
	KO11	0000080_01	800	6	971	2610	912	1.8	Signal			KO11	971	65900	0.0147344	14.7344
		TOM20
		Image Name	Channel	Name	Signal	Total	Area	Bkgnd.	Type
DMSO	SH	0000080_01	800	7	113000	140000	1105	23.8	Signal
	FT385	0000080_01	800	8	105000	134000	1105	26.5	Signal
	KO11	0000080_01	800	9	83200	109000	1105	23.2	Signal
24h AO	SH	0000080_01	800	10	102000	130000	1105	25.1	Signal
	FT385	0000080_01	800	11	97200	124000	1105	24.4	Signal
	KO11	0000080_01	800	12	65900	85500	1105	17.7	Signal

## Sheet: 3E
Number of mitolysosomes per cell
mitoQC-counter output 'nMitolysosomes' , 80 cells per experiment analysed
		96h DMSO			96h FT385 200nM			96h FT385 500nM			Mean number of mitolysosomes per cell
Cell	Exp1	Exp2	Exp3	Exp1	Exp2	Exp3	Exp1	Exp2	Exp3		Replicate Experiment	96h DMSO	96h FT385 200nM	96h FT385 500nM
1	0	1	1	7	3	4	0	1	1		Exp1	1.7125	5.2375	3.8125
2	1	0	5	1	1	2	4	1	2		Exp2	2.0125	2.175	5.6875
3	0	1	1	0	0	4	11	0	8		Exp3	1.95	2.4625	2.325
4	1	1	37	2	1	2	1	6	9		Mean	1.89167	3.29167	3.94167
5	0	1	1	0	0	1	8	4	0		stdev	0.158278	1.69126	1.68497
6	2	1	1	10	0	0	17	0	27
7	0	0	0	3	0	1	18	2	16
8	6	0	1	4	3	2	1	2	2
9	0	0	0	0	0	0	2	6	1
10	0	1	1	0	0	2	2	1	1
11	0	1	0	0	0	0	0	3	1
12	1	2	4	25	2	4	0	11	1
13	0	4	2	38	2	5	1	3	8
14	0	0	3	3	11	4	1	5	5
15	2	2	3	3	0	4	1	3	0
16	3	3	6	23	1	0	1	7	2
17	1	8	3	8	3	0	1	10	0
18	0	4	1	9	1	0	2	3	0
19	0	4	0	3	4	0	0	6	0
20	0	1	2	0	2	1	3	3	2
21	1	1	0	1	1	0	2	5	1
22	2	27	1	8	2	4	0	11	2
23	1	0	6	3	12	4	3	16	1
24	1	0	0	1	1	5	2	1	1
25	3	2	1	0	2	5	3	2	1
26	3	0	1	0	14	8	0	0	3
27	2	4	2	0	0	1	10	0	2
28	0	0	6	0	0	0	6	1	1
29	3	4	2	3	1	1	4	1	0
30	24	0	1	0	0	1	5	1	0
31	1	0	1	0	0	4	2	3	1
32	5	1	0	0	0	2	3	7	0
33	2	1	0	1	2	0	11	4	0
34	1	0	0	8	1	1	0	6	0
35	0	1	1	6	0	6	40	50	0
36	1	1	2	0	0	1	2	8	1
37	0	0	1	2	0	0	2	3	3
38	0	2	0	25	5	1	8	0	5
39	0	11	1	28	1	4	1	2	6
40	0	3	4	32	5	3	0	5	2
41	1	1	1	2	0	7	3	1	3
42	3	1	0	0	0	0	0	3	2
43	1	0	7	4	4	4	0	2	3
44	4	2	0	5	2	0	11	1	0
45	1	2	0	0	4	2	4	4	14
46	0	1	2	1	1	0	3	0	0
47	5	0	4	23	2	1	1	12	0
48	0	1	1	3	2	0	2	10	0
49	2	1	2	0	2	1	0	8	1
50	8	1	1	6	0	1	0	25	8
51	3	2	5	2	3	4	3	0	1
52	4	0	0	1	3	1	0	0	0
53	1	0	0	2	1	7	8	2	3
54	0	0	0	17	1	1	4	3	0
55	0	0	1	20	2	3	4	5	7
56	1	2	1	12	2	1	1	4	1
57	1	17	2	5	0	0	2	2	1
58	0	2	0	0	2	1	2	4	0
59	1	2	0	12	1	9	7	29	0
60	0	5	0	3	1	0	4	26	2
61	6	1	0	1	5	0	1	25	2
62	1	1	1	0	2	1	4	1	4
63	5	5	0	0	0	0	2	1	1
64	0	0	0	13	0	1	0	0	0
65	0	6	2	11	2	6	9	2	0
66	0	1	0	6	0	1	5	1	1
67	0	2	0	0	2	0	3	0	1
68	0	1	2	0	3	0	7	4	0
69	2	0	1	0	0	2	4	0	0
70	0	2	0	1	1	0	5	1	1
71	0	1	3	0	8	20	3	3	1
72	1	0	1	2	8	1	5	2	4
73	4	0	1	0	10	1	5	8	0
74	10	2	1	2	2	16	1	9	0
75	3	0	4	0	0	1	3	20	0
76	1	2	3	0	2	2	6	8	0
77	0	0	1	7	8	8	0	4	1
78	1	0	3	1	2	2	1	9	2
79	0	0	0	0	4	4	0	7	4
80	0	4	4	0	1	1	4	6	2
Mean	1.7125	2.0125	1.95	5.2375	2.175	2.4625	3.8125	5.6875	2.325
stdev	3.20677	3.83024	4.31629	8.26958	2.88942	3.36378	5.48437	7.96923	4.08695
Mean number of mitolysosomes per cell statistics
Ordinary one-way ANOVA
Table Analyzed	No. of mitolysosomes - all points on graph
ANOVA summary
F	9.43
P value	< 0.0001
P value summary	****
Are differences among means statistically significant? (P < 0.05)	Yes
R square	0.02563
Brown-Forsythe test
F (DFn, DFd)	7.433 (2, 717)
P value	0.0006
P value summary	***
Significantly different standard deviations? (P < 0.05)	Yes
Bartlett's test
Bartlett's statistic (corrected)	57.03
P value	< 0.0001
P value summary	****
Significantly different standard deviations? (P < 0.05)	Yes
ANOVA table	SS	DF	MS	F (DFn, DFd)	P value
Treatment (between columns)	526.8	2	263.4	F (2, 717) = 9.430	P < 0.0001
Residual (within columns)	20028	717	27.93
Total	20555	719
Data summary
Number of treatments (columns)	3
Number of values (total)	720
Multiple Comparisons
Number of families	1
Number of comparisons per family	2
Alpha	0.05
Dunnett's multiple comparisons test	Mean Diff.	95% CI of diff.	Significant?	Summary
96h DMSO vs. 96h FT385 200nM	-1.4	-2.469 to -0.3306	Yes	**
96h DMSO vs. 96h FT385 500nM	-2.05	-3.119 to -0.9806	Yes	****
Test details	Mean 1	Mean 2	Mean Diff.	SE of diff.	n1	n2	q	DF
96h DMSO vs. 96h FT385 200nM	1.892	3.292	-1.4	0.4825	240	240	2.902	717
96h DMSO vs. 96h FT385 500nM	1.892	3.942	-2.05	0.4825	240	240	4.249	717
