# Supplementary material for: USP30 sets a trigger threshold for PINK1–PARKIN amplification of mitochondrial ubiquitylation
Source: Life Sci Alliance. 2020 Jul 7;3(8):e202000768. doi: 10.26508/lsa.202000768 (PMC7362391; doi:10.26508/lsa.202000768)
Supplement: Supplementary file 7 [file LSA-2020-00768_TableS1.xlsx]

## Sheet: Experimental conditions
Table S1. Proteome and ubiquitylome data for USP30 KO and inhibitor treated SHSY5Y cells. Comparisons with AO and/or inhibitor are 24 h post treatment (AO = 1 μM, FT385 = 200 nM). Data relate to Fig 4.
Experimental Conditions
	Expt1 (A)	Expt2 (B)	Expt3 (C)	Expt4 (D) (proteome only)
Light	SHSY5Y DMSO	SHSY5Y AO	SHSY5Y AO	SHSY5Y DMSO
Medium	USP30-KO11 AO	USP30-KO11 AO	USP30-KO11 AO	KO11 DMSO
Heavy	SHSY5Y FT385	SHSY5Y FT385 AO	SHSY5Y FT385 AO	SHSY5Y FT385
AO = 1µM each 24Hrs
FT385 = 200nM 24hrs (co-treatment with AO where applicable)
Ubiquitome - Position changes
Some position numbers have been manually curated to reflect their site number in the canonical uniprot sequence.
Gene name	Original Position	New Position
GRSF1	179	242
PTRH2	48	47
NCAM1	775	785
RPL19	177	180

## Sheet: Proteome
						Expt 1		Expt 2		Expt 3		Expt 4		Expt 2/3 Average (n=2)
Majority protein IDs	Gene names	Lead Gene names	Mito	Perox	Protein names	KO11-AO/DMSO normalized A LOG2	FT385/DMSO normalized A LOG2	KO11-AO/AO normalized B LOG2	FT385-AO/AO normalized B LOG2	KO11-AO/AO 2 normalized C LOG2	FT385-AO/AO 2 normalized C LOG2	KO11/SHSY5Y normalized D LOG2	FT385/DMSO normalized D LOG2	KO11-AO/AO Av LOG2	FT385-AO/AO Av LOG2	Peptides
P10909;H0YC35	CLU	CLU	#N/A	#N/A	Clusterin;Clusterin beta chain;Clusterin alpha chain;Clusterin	2.50419	0.644779	2.94873	1.27626	3.02756	0.365133	2.38687	-0.503343	2.98868	0.891458	7
Q04828;B4DK69;P52895;H0Y804	AKR1C1;AKR1C2	AKR1C1	#N/A	#N/A	Aldo-keto reductase family 1 member C1;Aldo-keto reductase family 1 member C2	2.12767	0.0257376	2.44082	0.215368	2.92448	0.908429	1.77353	0.207268	2.70282	0.603122	8
P31949	S100A11	S100A11	#N/A	#N/A	Protein S100-A11;Protein S100-A11, N-terminally processed	2.9528	0.0127833	2.81728	-0.0293672	2.52233	-0.35194	2.40893	-0.476077	2.67733	-0.181657	9
Q14764	MVP	MVP	#N/A	#N/A	Major vault protein	2.10175		2.56638	0.769433	2.61457	-0.301373	2.04026	-0.911533	2.59067	0.331178	13
B7Z4U3;B7Z4L1;H7BXS2;Q9NRC1;C9JU30;E7EPD9	ST7	ST7	#N/A	#N/A	Suppressor of tumorigenicity 7 protein	-0.423565	-0.189664	3.301	0.175684	0.155749	-0.0370735	-0.0783047	-0.0805608	2.45549	0.0732239	10
G3V179;E9PMJ2;J3KP39;Q9BPY3;E9PIM5;E9PMW3	FAM118B	FAM118B	#N/A	#N/A	Protein FAM118B			3.1158	2.05856	0.255561	-0.397144			2.30194	1.30014	5
G8JLH6;P21926;A6NNI4;A0A2R8Y478;A0A087WU13	CD9	CD9	#N/A	#N/A	Tetraspanin;CD9 antigen	1.67351	-0.455356	1.91384	-0.635719	2.42584	-0.452846	2.21956	-0.742507	2.19243	-0.541387	7
Q96AJ9	VTI1A	VTI1A	#N/A	#N/A	Vesicle transport through interaction with t-SNAREs homolog 1A	-0.0941716	0.349478	2.74614	0.420617	-0.0308992	-0.0202819	0.0220482	0.124328	1.94261	0.216945	5
Q9H0F6	SHARPIN	SHARPIN	#N/A	#N/A	Sharpin	0.0882773	0.0731348	2.02599	0.286526	1.83911	-0.0915252			1.93557	0.109849	3
P08582	MFI2	MFI2	#N/A	#N/A	Melanotransferrin	1.17159	-0.0909873	1.62091	-0.105271	2.11443	-0.482734	1.26915	-0.932168	1.88868	-0.281693	27
P05060	CHGB	CHGB	#N/A	#N/A	Secretogranin-1;PE-11;GAWK peptide;CCB peptide	0.750778	-0.379151	1.92193	-0.335772	1.79996	-0.573274	1.77412	-0.928045	1.86223	-0.449641	68
P42658;E9PF59;E9PDL2	DPP6	DPP6	#N/A	#N/A	Dipeptidyl aminopeptidase-like protein 6	1.7536	-0.209945	1.53983	-0.216552	2.10484	-0.181493	2.15872	0.112767	1.84982	-0.198916	13
P13521	SCG2	SCG2	#N/A	#N/A	Secretogranin-2;Secretoneurin;Manserin	1.17479	0.0661237	1.92486	0.0843364	1.77049	-0.248331	1.75677	-0.368551	1.84974	-0.0724297	39
O60293	ZFC3H1	ZFC3H1	#N/A	#N/A	Zinc finger C3H1 domain-containing protein	-0.54061	-0.142067	2.57211	1.20345	0.140255	0.424815	-0.140762	0.0359054	1.8174	0.866038	12
P09486;F5GY03;E5RK62	SPARC	SPARC	#N/A	#N/A	SPARC	0.886823	0.209516	1.81053	0.0224743	1.78718	-0.0997573	1.25562	-0.480841	1.7989	-0.0373474	8
A0A0S2Z4G6;P09493;H0YNC7;H0YKP3	TPM1	TPM1	#N/A	#N/A	Tropomyosin alpha-1 chain	1.69622	0.193078	1.84523	0.323658	1.73816	0.242694	1.66421	0.457332	1.79269	0.283744	31
E7ENM0;B3KRT8	ELN	ELN	#N/A	#N/A		0.839234	0.0515809	1.09072		1.97607		1.80645	-0.218968	1.60027		4
Q9BSV6	TSEN34	TSEN34	#N/A	#N/A	tRNA-splicing endonuclease subunit Sen34	0.033793	0.204767	0.128293	0.0787465	2.31089	0.138421	-0.08982	-0.0351209	1.5981	0.108892	4
P22466	GAL	GAL	#N/A	#N/A	Galanin peptides;Galanin;Galanin message-associated peptide	0.946132	-0.0865533	1.33668	-0.18705	1.77981	-0.149745	1.63115	-0.326643	1.57519	-0.168277	8
P48307;A0A3B3IS67	TFPI2	TFPI2	#N/A	#N/A	Tissue factor pathway inhibitor 2	1.04977	0.172872	1.57937	1.36362	1.40103	0.0683268	1.23309	-0.0644045	1.49296	0.856707	5
P61018;M0R0X1	RAB4B	RAB4B	#N/A	#N/A	Ras-related protein Rab-4B	0.215865	0.329985	0.0926134	0.688315	2.18078	-0.273256	2.10913	0.615699	1.4855	0.286201	6
E7EPV7;P37840;D6RA31;H6UYS7	SNCA	SNCA	Known mitochondrial	#N/A	Alpha-synuclein	0.87523	0.1149	1.36586	0.122871	1.56793	-0.162105	1.46038	-0.130587	1.47043	-0.0125919	14
Q9BXW7	CECR5	CECR5	Known mitochondrial	#N/A	Cat eye syndrome critical region protein 5	-0.598348	0.0629506	2.19547	0.760519	-0.0933095	-0.234499	-0.0484271	-0.124896	1.46409	0.347144	19
P06703;R4GN98	S100A6	S100A6	#N/A	#N/A	Protein S100-A6;Protein S100	1.41797	-0.0208965	1.57937	-0.0761586	1.3372	-0.390359	1.14254	-0.386714	1.46336	-0.224722	10
M0QXZ5;Q96B54	ZNF428	ZNF428	#N/A	#N/A	Zinc finger protein 428	-0.401806	0.290778	2.14228	0.808838	0.130931	-0.00131343	0.672471	1.04879	1.46195	0.459898	3
H3BPQ3;B7Z9X4;H3BQJ4;Q9ULP0	NDRG4	NDRG4	#N/A	#N/A	Protein NDRG4	0.5655	0.311736	1.11243	0.755315	1.69095	0.429857	1.23652	0.0485151	1.4305	0.601744	3
F8W703;Q9HCK4;R4GMM8;A0A087WWM5;F8WBR3	ROBO2	ROBO2	#N/A	#N/A	Roundabout homolog 2	0.284277	1.35947	1.69082	0.851439	1.11237	-0.234228	0.718877	-0.698974	1.43039	0.408407	20
P19021;H7BYD9	PAM	PAM	#N/A	#N/A	Peptidyl-glycine alpha-amidating monooxygenase;Peptidylglycine alpha-hydroxylating monooxygenase;Peptidyl-alpha-hydroxyglycine alpha-amidating lyase	0.76545	-0.476077	1.45418	-0.433876	1.35772	-0.3363	1.08011	-0.614536	1.40675	-0.384264	19
P68366	TUBA4A	TUBA4A	#N/A	#N/A	Tubulin alpha-4A chain	0.809991	-0.0985365	1.23383	-0.795784	1.52411	-0.357123	1.03436	-0.629412	1.38626	-0.559845	36
O75525;E5RJZ9;E5RG12;H0YAQ3;H0YAQ1	KHDRBS3	KHDRBS3	#N/A	#N/A	KH domain-containing, RNA-binding, signal transduction-associated protein 3	1.17274	-0.158381	1.42787	0.0535284	1.31092	0.0659859	1.2658	0.0139266	1.37058	0.0597706	15
P21291;E9PS42;E9PND2;E9PP21	CSRP1	CSRP1	#N/A	#N/A	Cysteine and glycine-rich protein 1	1.45354	0.286763	1.21735	0.246712	1.46378	-0.0782743	1.44265	0.253263	1.34582	0.0933505	8
F5GY05;A0A0D9SEJ5;Q96EK7	FAM120B	FAM120B	#N/A	#N/A	Constitutive coactivator of peroxisome proliferator-activated receptor gamma	0.192952	0.1121	-0.32916	-0.440342	2.09562	-0.104248	0.826437	0.152508	1.34201	-0.26253	6
P15259	PGAM2	PGAM2	#N/A	#N/A	Phosphoglycerate mutase 2	1.30568	0.0576928	1.36109	0.170694	1.30644	0.090718	1.07943	-0.457058	1.33402	0.13126	12
P20337	RAB3B	RAB3B	#N/A	#N/A	Ras-related protein Rab-3B			1.04558	0.610794	1.55743	0.443713	0.650948	-0.460945	1.32409	0.529671	5
Q09666	AHNAK	AHNAK	#N/A	#N/A	Neuroblast differentiation-associated protein AHNAK	1.16826	-0.440283	1.22225	-0.515542	1.40403	-0.475395	1.21288	-0.616326	1.316	-0.495329	147
H3BLU2;Q13449;F5H5G1	LSAMP	LSAMP	#N/A	#N/A	Limbic system-associated membrane protein	0.651224	-0.157641	1.25635	-0.122444	1.36922	-0.0377249	0.964214	-0.423468	1.31388	-0.0794628	12
Q96AD5	PNPLA2	PNPLA2	#N/A	#N/A	Patatin-like phospholipase domain-containing protein 2	1.27941	-0.00244017	1.91165	1.4507	0.231924	-0.440577			1.30358	0.795036	6
P43897;C9JT21	TSFM	TSFM	Known mitochondrial	#N/A	Elongation factor Ts, mitochondrial;Elongation factor Ts	-1.44363	0.0243196	1.88698	0.647361	0.138552	0.187388	-0.0920018	0.0136409	1.26285	0.435629	16
P21579;J3KQA0	SYT1	SYT1	#N/A	#N/A	Synaptotagmin-1	0.7876	-0.0178406	1.22546	-0.201128	1.29819	0.0342158	1.07327	-0.298424	1.26228	-0.0786627	17
E9PKC5;Q01432	AMPD3	AMPD3	#N/A	#N/A	AMP deaminase 3			1.19686	0.262313	1.28072	-0.0941716	1.33794	0.226508	1.2394	0.0950535	5
B7ZKQ9;Q8WTV0;F5H4X0	SCARB1	SCARB1	#N/A	#N/A	Scavenger receptor class B member 1	0.322505	-0.0839056	0.881978	-0.363327	1.51773	0.935912	1.50432	0.16092	1.23459	0.427858	7
Q8NI60	ADCK3	ADCK3	Known mitochondrial	#N/A	Atypical kinase ADCK3, mitochondrial	-1.47477	-0.07312	1.81266	0.410884	0.136191	-0.111617	-0.208228	-0.123167	1.20536	0.173159	19
P10645;G5E968	CHGA	CHGA	#N/A	#N/A	Chromogranin-A;Vasostatin-1;Vasostatin-2;EA-92;ES-43;Pancreastatin;SS-18;WA-8;WE-14;LF-19;Catestatin;AL-11;GV-19;GR-44;ER-37;GE-25;Serpinin-RRG;Serpinin;p-Glu serpinin precursor	0.190931	-0.0505921	1.39028	-0.0256616	0.985938	-0.393444	1.17281	-0.628029	1.20223	-0.197865	39
Q9UHG2	PCSK1N	PCSK1N	#N/A	#N/A	ProSAAS;KEP;Big SAAS;Little SAAS;Big PEN-LEN;PEN;Little LEN;Big LEN	0.253021	-0.269582	1.14783	-0.258425	1.23156	-0.024766	1.07546	-0.754018	1.1903	-0.13687	9
H7BYY1;F5H7S3;B7Z596;A0A494BZZ2	TPM1	TPM1	#N/A	#N/A		1.01343	0.147307	1.12314	0.202512	1.24653	0.218223	1.13953	0.238665	1.18615	0.210389	35
P22830;A0A499FJN5;K7ELX4	FECH	FECH	Known mitochondrial	#N/A	Ferrochelatase, mitochondrial	-0.431248	0.0889556	1.68504	0.463204	0.395063	-0.223862	0.361544	-0.137346	1.17967	0.160191	20
Q99519;E9PIF4	NEU1	NEU1	#N/A	#N/A	Sialidase-1	0.234133	-0.111399	1.36014	-0.157287	0.964436	-0.247303	0.621618	0.00805652	1.17581	-0.201593	2
P04424;F8W943	ASL	ASL	#N/A	#N/A	Argininosuccinate lyase	0.783666	0.159113	1.19787	0.612588	1.14776	-0.11616	0.464668	-0.416365	1.17303	0.293747	13
Q96CN7	ISOC1	ISOC1	#N/A	#N/A	Isochorismatase domain-containing protein 1	1.46315	0.024036	1.53346	0.142479	0.680144	-0.00756511	0.668392	0.347779	1.16899	0.0694066	19
P01344	IGF2	IGF2	#N/A	#N/A	Insulin-like growth factor II;Insulin-like growth factor II;Insulin-like growth factor II Ala-25 Del;Preptin			1.13632	-0.261708	1.17498	-0.572265	1.31794	-0.4856	1.15578	-0.408646	5
F5H619;Q86XA9;H7C5W6	HEATR5A	HEATR5A	#N/A	#N/A	HEAT repeat-containing protein 5A	1.35547	-0.144122	1.2664	0.0874628	1.02609	0.516116	0.663663	-0.215061	1.15124	0.317651	9
Q8NFV4	ABHD11	ABHD11	Known mitochondrial	#N/A	Alpha/beta hydrolase domain-containing protein 11	0.0136409	0.379621	1.73613	0.853597	0.0482362	-0.288364	0.406537	-0.179678	1.12611	0.392774	14
J3KQ12;E9PIU3;H7BXM1	BSCL2	BSCL2	#N/A	#N/A		1.03555	0.484293	0.237074	0.330903	1.66243	0.0874628	1.06136	0.193078	1.11906	0.214311	6
Q9HCJ6	VAT1L	VAT1L	#N/A	#N/A	Synaptic vesicle membrane protein VAT-1 homolog-like	0.800745	0.095587	1.03365	0.187894	1.19043	-0.283492	1.24135	0.20389	1.11417	-0.0286312	8
P54289	CACNA2D1	CACNA2D1	#N/A	#N/A	Voltage-dependent calcium channel subunit alpha-2/delta-1;Voltage-dependent calcium channel subunit alpha-2-1;Voltage-dependent calcium channel subunit delta-1	0.662661	0.0972062	1.06364	0.1141	1.14561	0.0589399	1.08127	-0.163623	1.10521	0.0867837	47
Q9UHI8	ADAMTS1	ADAMTS1	#N/A	#N/A	A disintegrin and metalloproteinase with thrombospondin motifs 1	0.000576886	-0.91156	0.742092	-0.216518	1.39292	-0.256942	1.09963	-0.742651	1.1039	-0.236588	13
J3KNV1;O60281	ZNF292	ZNF292	#N/A	#N/A	Zinc finger protein 292	0.123799	-0.0115007	0.181802	0.108357	1.64607	0.405339	0.857344	1.08692	1.09224	0.264476	9
P30740	SERPINB1	SERPINB1	#N/A	#N/A	Leukocyte elastase inhibitor	0.242938	-0.314302	1.29995	-0.0796153	0.832769	-0.397201	0.794187	-0.179237	1.08519	-0.229687	12
A0A087WV24;P20711;A0A087WU57;H7BZF7	DDC	DDC	#N/A	#N/A	Aromatic-L-amino-acid decarboxylase	1.11537	0.165558	0.692606	-0.0692854	1.38173	0.135404	1.34812	-0.221001	1.07793	0.0366862	32
Q04656	ATP7A	ATP7A	#N/A	#N/A	Copper-transporting ATPase 1	1.05811	0.00690831	0.996172	0.0192037	1.15484	0.0464211	0.794936	-0.174589	1.07769	0.0328766	26
H3BN55;P51159;H3BUD9;H3BS49;H3BVH7	RAB27A	RAB27A	#N/A	#N/A	Ras-related protein Rab-27A	0.265917	-0.745454	1.09896	2.57391	1.03766	0.33308	0.737081	0.0233263	1.06864	1.85078	5
Q9HAT2	SIAE	SIAE	#N/A	#N/A	Sialate O-acetylesterase	0.549423	-0.286955	0.897473	-0.0665029	1.21866	-0.0841961	0.946282	-0.746108	1.06698	-0.0753224	7
P02545	LMNA	LMNA	#N/A	#N/A	Prelamin-A/C;Lamin-A/C	0.965101	-0.0901117	1.00597	-0.0398442	1.11869	-0.169615	1.04523	-0.254479	1.06343	-0.103271	101
Q96N66	MBOAT7	MBOAT7	#N/A	#N/A	Lysophospholipid acyltransferase 7	0.596076	-0.0573916	0.562084	-0.184457	1.43264	0.125916	0.83552	-0.536189	1.06205	-0.0209405	10
Q92597	NDRG1	NDRG1	#N/A	#N/A	Protein NDRG1	0.533663	0.536849	0.781402	0.138814	1.29084	-0.0239297	0.721416	-0.102806	1.05849	0.059736	9
P61769;H0YLF3;F5H6I0	B2M	B2M	#N/A	#N/A	Beta-2-microglobulin;Beta-2-microglobulin form pI 5.3	0.32239	0.0788831	0.978928	0.0226164	1.11557	-0.0381397	0.679964	0.0192037	1.04886	-0.00744185	2
Q15147	PLCB4	PLCB4	#N/A	#N/A	1-phosphatidylinositol 4,5-bisphosphate phosphodiesterase beta-4	0.725698	-0.142274	0.938474	-0.398874	1.14919	0.502534	0.868371	-0.124597	1.04768	0.121115	30
P56199	ITGA1	ITGA1	#N/A	#N/A	Integrin alpha-1	0.726395	0.0219061	0.959399	0.0635029	1.12367	-0.0263814	1.01757	-0.229061	1.04387	0.0192607	32
Q01459	CTBS	CTBS	#N/A	#N/A	Di-N-acetylchitobiase			1.16684	-0.397809	0.90912	-0.905953	1.29566	-0.46895	1.04373	-0.629624	5
Q9C0F1	CEP44	CEP44	#N/A	#N/A	Centrosomal protein of 44 kDa	1.01635	0.176706	0.989866	0.0588013	1.06819	0.104337	0.958954	0.0835197	1.02956	0.0817487	25
Q08380	LGALS3BP	LGALS3BP	#N/A	#N/A	Galectin-3-binding protein	0.123799	0.0113525	0.908121	0.065848	1.13258	0.066537	0.79427	-0.209945	1.02471	0.0661925	19
P42773	CDKN2C	CDKN2C	#N/A	#N/A	Cyclin-dependent kinase 4 inhibitor C	0.683562	-0.110495	0.866235	0.217603	1.14196	0.00805652	0.568129	0.168899	1.01067	0.116631	6
Q8IWE2	FAM114A1	FAM114A1	#N/A	#N/A	Protein NOXP20	0.723428	-0.548797	1.12181	0.0467006	0.87578	-0.491652	0.928124	-0.489646	1.00403	-0.197509	7
P07711	CTSL	CTSL	#N/A	#N/A	Cathepsin L1;Cathepsin L1 heavy chain;Cathepsin L1 light chain	0.26111	-0.0263961	1.2394	0.42374	0.720716	-0.496102	0.290306	-0.417675	1.00324	0.0359195	5
P59768;G3V3J9;G3V2N0;G3V2C9	GNG2	GNG2	#N/A	#N/A	Guanine nucleotide-binding protein G(I)/G(S)/G(O) subunit gamma-2;Guanine nucleotide-binding protein subunit gamma	0.636543	-0.16225	0.883621	0.137766	1.10024	-0.218783	0.774924	-0.342909	0.995991	-0.0295217	8
P12821;A0A0A0MSN4	ACE	ACE	#N/A	#N/A	Angiotensin-converting enzyme;Angiotensin-converting enzyme, soluble form	-0.134319	-0.329359	0.907506	0.0773797	1.06991	-0.344099	0.925012	-0.164092	0.990991	-0.118022	21
Q96JE9	MAP6	MAP6	#N/A	#N/A	Microtubule-associated protein 6	0.901185		0.571531	0.0669503	1.29748	-0.294774	1.11137	-0.763465	0.979696	-0.102605	12
Q8IV08	PLD3	PLD3	#N/A	#N/A	Phospholipase D3	0.0532504	-0.0541826	1.04677	-0.138473	0.899408	0.106348	0.966947	0.00187425	0.97497	-0.0108755	15
A0A2P0CTB1;A0A0A0MT35;Q8TBF2;J3KPF6;J3KPF5;J3QKK8;A0A0G2JSF1;A0A2P0CTH9;J3KRV9;A0A2P0CU24;A0A0A0MRV4;A0A0G2JRR6	FAM213B	FAM213B	#N/A	#N/A	Prostamide/prostaglandin F synthase			1.01614	0.221692	0.89724	-0.154731	0.879157	-0.0524909	0.957915	0.0457226	4
Q96CX2	KCTD12	KCTD12	#N/A	#N/A	BTB/POZ domain-containing protein KCTD12	1.45344	0.0104934	1.20852	0.223546	0.654344	0.19497	0.345964	0.259423	0.957877	0.209329	12
Q8NI08	NCOA7	NCOA7	#N/A	#N/A	Nuclear receptor coactivator 7	1.02623	-0.0817512	0.987612	0.0569996	0.926227	-0.0199016	0.891652	-0.41275	0.957246	0.0190614	18
O14548;E5RJZ1;H0YBD2	COX7A2L	COX7A2L	Known mitochondrial	#N/A	Cytochrome c oxidase subunit 7A-related protein, mitochondrial	-0.138299	0.0236102	1.03125	0.299714	0.874758	-0.0502634	0.766298	0.203514	0.955127	0.135312	6
O94919	ENDOD1	ENDOD1	#N/A	#N/A	Endonuclease domain-containing 1 protein	0.358396	-0.325865	0.425244	-0.220076	1.33851	-0.197534	0.846313	-0.237762	0.952967	-0.208761	10
E7EW69;B5ME97;Q9P0V9;E7EX04	SEPT10	SEPT10	#N/A	#N/A	Septin-10	0.634129	0.0947765	1.00741	0.123136	0.869871	-0.0105558	0.775261	0.116365	0.940279	0.0578384	17
Q13501;E7EMC7;E9PFW8;C9JRJ8;E3W990	SQSTM1	SQSTM1	#N/A	#N/A	Sequestosome-1	1.19818	0.399882	0.895535	0.166844	0.981853	0.143916	0.90381	-0.168917	0.939339	0.155425	8
Q9UK22;A0A286YF37	FBXO2	FBXO2	#N/A	#N/A	F-box only protein 2	0.499068	-0.364942	0.486766	-0.612351	1.27929	-0.0133342	0.966652	-0.839519	0.936779	-0.281974	7
P26038	MSN	MSN	#N/A	#N/A	Moesin	0.836651	0.0186342	0.959325	-0.00479769	0.912267	-0.0915252	0.782576	-0.109872	0.935988	-0.0475098	65
P54219;Q96GL6	SLC18A1	SLC18A1	#N/A	#N/A	Chromaffin granule amine transporter	0.587941	-0.155647	0.438825	-0.264842	1.30094	-0.183966	1.59307	-0.363271	0.933346	-0.223837	7
P17050	NAGA	NAGA	#N/A	#N/A	Alpha-N-acetylgalactosaminidase	0.68715	0.00662125	0.761455	-0.174898	1.0825	-0.305289	0.586597	-0.316887	0.930889	-0.238621	9
A0A087X1W8;A0A0A0MTJ8;X5DQS5;Q9BY67;A0A087X0T8	CADM1	CADM1	#N/A	#N/A	Cell adhesion molecule 1	-0.048084	-0.263161	1.3549	0.0731348	0.307895	-0.308519	0.290542	-0.36628	0.924366	-0.105108	11
P17931;G3V3R6	LGALS3	LGALS3	#N/A	#N/A	Galectin-3;Galectin	0.420186	-0.246395	0.851279	-0.467075	0.991898	-0.32283	0.738984	-0.334407	0.923301	-0.39315	9
Q9C004;A0A0C4DFS6;D6RB56	SPRY4	SPRY4	#N/A	#N/A	Protein sprouty homolog 4			1.15885	-0.197666	0.640436	-0.131329			0.922807	-0.164116	4
P16870	CPE	CPE	#N/A	#N/A	Carboxypeptidase E	0.195222	0.0196308	0.982729	0.0899048	0.853676	-0.281386	0.741489	-0.471529	0.919645	-0.0838292	28
Q96HC4	PDLIM5	PDLIM5	#N/A	#N/A	PDZ and LIM domain protein 5	1.15393	-0.00987292	0.950692	-0.138553	0.885184	0.00590291	0.782409	0.102591	0.91831	-0.0645177	31
A0A087X0S5;P12109	COL6A1	COL6A1	#N/A	#N/A	Collagen alpha-1(VI) chain	0.0416635	-0.10869	1.2676	0.397584	0.455439	-0.322181	0.119821	-1.16663	0.917928	0.0821303	12
P09417;B7Z415;D6RGG7	QDPR	QDPR	Known mitochondrial	#N/A	Dihydropteridine reductase	0.822771	0.0650208	0.851839	0.0965318	0.977976	-0.0193312	0.892818	-0.154056	0.916286	0.0397631	21
Q3BDU5	LMNA	LMNA	#N/A	#N/A		0.755657	-0.00320631	0.894139	0.225892	0.936289	0.0954519	0.861003	-0.0200624	0.915368	0.162146	86
Q15113	PCOLCE	PCOLCE	#N/A	#N/A	Procollagen C-endopeptidase enhancer 1	0.40414	-0.053913	1.03337	-0.121722	0.783918	-0.37146	0.950842	-0.427964	0.914029	-0.241194	23
O14773;A0A2R8Y7U1;A0A2R8YGD1;A0A2R8YD45	TPP1	TPP1	Predicted mitochondrial	#N/A	Tripeptidyl-peptidase 1	0.413377	-0.181002	0.853197	-0.590528	0.96857	-0.112241	0.915865	-0.372169	0.912037	-0.331654	10
Q6ZW49	PAXIP1	PAXIP1	#N/A	#N/A	PAX-interacting protein 1			1.32135	0.211012	0.327917	0.0483758	0.144177	0.138028	0.908506	0.131985	6
P57103	SLC8A3	SLC8A3	Known mitochondrial	#N/A	Sodium/calcium exchanger 3			0.700795	-0.106234	1.08801	-0.0768737	0.770195	-0.154458	0.907352	-0.0914791	5
A0A0D9SF30	NCAM1	NCAM1	#N/A	#N/A		0.322851	0.00920381	0.937947	0.0265876	0.868687	-0.254599	0.806778	-0.418736	0.903732	-0.107166	7
Q658P3;B8ZZX6	STEAP3	STEAP3	#N/A	#N/A	Metalloreductase STEAP3	0.0244615	-0.25608	0.972325	-0.126061	0.818523	-0.282211	0.653885	-0.764739	0.897473	-0.202024	11
O75094;A0A0A0MSC8	SLIT3	SLIT3	Known mitochondrial	#N/A	Slit homolog 3 protein	-0.511506	0.0703893	0.409255	-0.149537	1.25773	0.216238	1.17957	0.0186342	0.894992	0.0449116	16
A0A087WUQ6;P07203;A0A2R8Y6B6	GPX1	GPX1	Known mitochondrial	#N/A	Glutathione peroxidase;Glutathione peroxidase 1	0.688136	-0.309038	0.838105	0.176833	0.928579	-0.699865	0.861558	-0.0280721	0.884051	-0.195922	6
Q9NQ66;A0A087WW73;A0A087WT80;A0A0D9SF51;A0A0D9SG17;A0A1B0GWB6;H0YCJ2	PLCB1	PLCB1	#N/A	#N/A	1-phosphatidylinositol 4,5-bisphosphate phosphodiesterase beta-1;Phosphoinositide phospholipase C	0.878686	-0.0144705	1.10266	0.338681	0.60862	-0.262157	0.691445	0.240864	0.876684	0.0693172	12
Q9NZ08	ERAP1	ERAP1	#N/A	#N/A	Endoplasmic reticulum aminopeptidase 1	0.472488	-0.045357	1.10064	0.477159	0.603692	-0.668295	0.764686	-0.394809	0.873459	0.0152477	14
Q9Y5X2	SNX8	SNX8	#N/A	#N/A	Sorting nexin-8	0.188528	0.141564	-0.00595617	0.344828	1.39539		0.815001	-0.468851	0.85857		13
C9JYY6;Q92823;F8W775;A0A087X2B3	NRCAM	NRCAM	#N/A	#N/A	Neuronal cell adhesion molecule	-0.745454	-0.38464	1.37044	0.179893	0.0480967	-0.357308	-0.0676062	-0.261846	0.855751	-0.0638464	46
P54802	NAGLU	NAGLU	#N/A	#N/A	Alpha-N-acetylglucosaminidase;Alpha-N-acetylglucosaminidase 82 kDa form;Alpha-N-acetylglucosaminidase 77 kDa form	0.753091	-0.149585	0.878921	-0.230025	0.822689	-0.0421003	0.53097	-0.127431	0.851079	-0.133005	17
A0A1B0GV05;Q684P5	RAP1GAP2	RAP1GAP2	#N/A	#N/A	Rap1 GTPase-activating protein 2	0.914029	-0.108985	0.948152	-0.0902192	0.734222	-0.357622	0.772139	-0.243165	0.845149	-0.217734	19
Q9NQW6	ANLN	ANLN	#N/A	#N/A	Actin-binding protein anillin	0.838992	-1.17837	1.42996	-1.39096	-0.159219	0.657091			0.843948	-0.0304645	9
B8ZZA8;B8ZZC5	GLS	GLS	Known mitochondrial	#N/A		-1.10547	-0.150737	1.46952	0.296311	-0.307966	0.041243	-0.3413	0.0405417	0.838782	0.174406	9
Q13510;A0A1B0GTZ5;A0A1B0GTM3;A0A1B0GUA4;A0A1B0GW68;E7EMM4;A0A1B0GTP7;A0A1B0GUH5;A0A1B0GUW4;A0A1B0GUE3;A0A1B0GUG1;A0A1B0GV06;A0A1B0GVG2;A0A1B0GUB3	ASAH1	ASAH1	Predicted mitochondrial	#N/A	Acid ceramidase;Acid ceramidase subunit alpha;Acid ceramidase subunit beta	0.655077	-0.0968074	0.740453	-0.108783	0.926986	-0.0712393	0.806613	-0.148241	0.836732	-0.089889	16
Q9BXV9	C14orf142	C14orf142	#N/A	#N/A	Uncharacterized protein C14orf142	0.420186	0.407516	1.10057	0.703101	0.507719	0.185359	2.45194	2.68621	0.834388	0.467332	4
P05067;E9PG40;A0A0A0MRG2;H7C0V9	APP	APP	#N/A	#N/A	Amyloid beta A4 protein;N-APP;Soluble APP-alpha;Soluble APP-beta;C99;Beta-amyloid protein 42;Beta-amyloid protein 40;C83;P3(42);P3(40);C80;Gamma-secretase C-terminal fragment 59;Gamma-secretase C-terminal fragment 57;Gamma-secretase C-terminal fragment 50;C31	-0.805081	-0.09068	0.745797	-0.281421	0.91265	-0.112241	0.182692	-0.170573	0.831634	-0.194353	15
P04066	FUCA1	FUCA1	#N/A	#N/A	Tissue alpha-L-fucosidase	0.708938	0.0366088	0.862749	-0.181902	0.790855	-0.411675	0.714751	-0.0857876	0.82725	-0.292219	8
Q92828	CORO2A	CORO2A	#N/A	#N/A	Coronin-2A			0.739675	-0.330556	0.905351	-0.80561	1.56905	-0.465142	0.82489	-0.548617	7
Q14249	ENDOG	ENDOG	Known mitochondrial	#N/A	Endonuclease G, mitochondrial	0.20989	0.22404	1.4305	0.733875	-0.243711	0.0366088	0.361207	0.42503	0.823737	0.426962	8
Q13740;F5GXJ9	ALCAM	ALCAM	#N/A	#N/A	CD166 antigen	0.311619	-0.342927	0.840363	-0.161782	0.805623	-0.246207	0.800662	-0.125195	0.823097	-0.203377	31
A0A0G2JQJ7;A0A0G2JPD5;P10636;A0A0G2JS76;A0A0G2JMX7	MAPT	MAPT	#N/A	#N/A	Microtubule-associated protein tau	0.262313	-0.0505921	0.691802	0.0657101	0.927062	-0.219388	0.880803	-0.29488	0.814222	-0.0698077	25
Q15223	PVRL1	PVRL1	#N/A	#N/A	Nectin-1	-0.0284251	-0.275123	1.03633	0.0913952	0.542704	-0.304915	0.724738	-0.204399	0.810525	-0.093194	14
Q9BW30	TPPP3	TPPP3	#N/A	#N/A	Tubulin polymerization-promoting protein family member 3	0.450063	0.0143553	0.47415	-0.226983	1.08284	-0.250783	0.855511	-0.604235	0.810361	-0.238834	13
Q14244;A0A087WZ40	MAP7	MAP7	#N/A	#N/A	Ensconsin	0.811553	0.063779	0.756596	-0.0271162	0.860049	-0.85794	1.23775	-0.0788227	0.80925	-0.383529	12
Q9UKR5	C14orf1	C14orf1	#N/A	#N/A	Probable ergosterol biosynthetic protein 28			0.319965	0.456175	1.16761	0.206143	0.257373	-0.269321	0.805169	0.336569	4
P42785;E9PQB5;E9PL85;E9PQN3;E9PKN6;E9PIG4	PRCP	PRCP	#N/A	#N/A	Lysosomal Pro-X carboxypeptidase	0.545375	-0.041046	0.897008	0.0721745	0.694301	-0.0169061	0.539432	0.000865329	0.799212	0.0283216	18
P50148	GNAQ	GNAQ	#N/A	#N/A	Guanine nucleotide-binding protein G(q) subunit alpha	0.395611	-0.0477112	0.589955	-0.0259407	0.972546	-0.093525	0.892896	-0.138203	0.793896	-0.0593371	31
Q9H8H3;H0YI09;F8VQX6	METTL7A	METTL7A	#N/A	#N/A	Methyltransferase-like protein 7A	0.821139	-0.199736	0.967611	-0.0343376	0.588325	0.0216219	0.434882	-0.231396	0.790397	-0.00608656	7
Q9UEY8	ADD3	ADD3	#N/A	#N/A	Gamma-adducin	0.42417	-0.289721	0.636358	-0.356218	0.923263	-0.127715	0.744161	-0.388469	0.786931	-0.237447	33
P98179	RBM3	RBM3	#N/A	#N/A	RNA-binding protein 3	0.46874	0.485324	1.35958	0.511063	-0.179662	0.200002	0.586212	1.1995	0.786182	0.3639	13
P22304;B3KWA1	IDS	IDS	#N/A	#N/A	Iduronate 2-sulfatase;Iduronate 2-sulfatase 42 kDa chain;Iduronate 2-sulfatase 14 kDa chain	0.650581	0.323082	0.957692	0.524164	0.584097	0.0812032	0.851039	-0.122287	0.782954	0.319618	8
P35754	GLRX	GLRX	#N/A	#N/A	Glutaredoxin-1	0.895923	0.138159	1.01878	0.474047	0.496616	-0.13603	0.308594	0.131721	0.781192	0.201019	6
C9JDL1;P50053	KHK	KHK	#N/A	#N/A	Ketohexokinase	1.19503	0.0483758	0.897783	0.0057592	0.652968	-0.603928	0.461948	-0.368998	0.780562	-0.267114	4
A8MVW0	FAM171A2	FAM171A2	#N/A	#N/A	Protein FAM171A2	0.135929	2.66773	0.856468	3.02551	0.688941	-0.0372067	0.532666	0.256286	0.775135	2.1886	6
O00754	MAN2B1	MAN2B1	#N/A	#N/A	Lysosomal alpha-mannosidase;Lysosomal alpha-mannosidase A peptide;Lysosomal alpha-mannosidase B peptide;Lysosomal alpha-mannosidase C peptide;Lysosomal alpha-mannosidase D peptide;Lysosomal alpha-mannosidase E peptide	0.619178	0.192825	0.669118	0.364236	0.866868	0.0545011	0.603122	0.0526941	0.771379	0.217665	28
P37802;X6RJP6	TAGLN2	TAGLN2	#N/A	#N/A	Transgelin-2	0.711495	0.0727232	0.772392	0.087327	0.763327	-0.168561	0.610889	-0.216837	0.767867	-0.0349509	30
Q9UM19;B4DGW9	HPCAL4	HPCAL4	#N/A	#N/A	Hippocalcin-like protein 4	0.498353	-0.127888	0.496616	-0.208761	0.995304	0.193078	0.581399	-0.111477	0.767401	0.00610411	12
P07858	CTSB	CTSB	#N/A	#N/A	Cathepsin B;Cathepsin B light chain;Cathepsin B heavy chain	0.408168	-0.0965297	0.657366	-0.128014	0.859334	-0.116833	0.643487	-0.204433	0.761881	-0.122413	14
Q13009;A0A1B0GW57	TIAM1	TIAM1	#N/A	#N/A	T-lymphoma invasion and metastasis-inducing protein 1	0.177344	0.013498	0.364572	0.0816123	1.0706	0.021764	1.51999	0.207643	0.760349	0.0519985	4
P52655	GTF2A1	GTF2A1	#N/A	#N/A	Transcription initiation factor IIA subunit 1;Transcription initiation factor IIA alpha chain;Transcription initiation factor IIA beta chain	0.386149	0.559247	1.19535	-0.335117	0.125916	0.119423	-0.0387323	0.0856966	0.757535	-0.0900196	5
A0A2R8Y5H9;Q8IVT5;A0A2R8Y4X0;A0A0A0MQW1;A8MY87	KSR1	KSR1	#N/A	#N/A	Kinase suppressor of Ras 1	0.524966	0.405557	0.291604	-0.117897	1.10822	0.0988237	0.324465	0.127633	0.756938	-0.00547098	6
P32004	L1CAM	L1CAM	#N/A	#N/A	Neural cell adhesion molecule L1	-0.162977	-0.308537	0.535854	-0.0996336	0.946656	-0.260705	0.750435	-0.68221	0.755828	-0.177923	43
P16035;B4DFW2;K7EIX4	TIMP2	TIMP2	#N/A	#N/A	Metalloproteinase inhibitor 2	0.0692898	-0.104356	0.532666	-0.17301	0.926151	-0.333952	0.892041	-0.457118	0.742782	-0.251238	12
O15069	NACAD	NACAD	#N/A	#N/A	NAC-alpha domain-containing protein 1	0.248535	-0.00889998	0.755657	-0.0138731	0.729531	-0.178437	0.90766	-0.259513	0.742653	-0.0938097	20
Q8NFW8	CMAS	CMAS	#N/A	#N/A	N-acylneuraminate cytidylyltransferase	0.572793	-0.090296	0.650305	-0.0337911	0.815739	0.0437644	0.935988	-0.13065	0.735392	0.00550775	26
P11498;A0A494C016	PC	PC	Known mitochondrial	#N/A	Pyruvate carboxylase, mitochondrial	-0.0283074	-0.0165266	1.13665	0.434668	0.173511	-0.157367	0.287827	0.00848693	0.734005	0.168809	63
I3L2W2;Q96JN8;I3L100;I3L2Z9	NEURL4	NEURL4	#N/A	#N/A	Neuralized-like protein 4			1.0655	1.14763	0.302524	0.564427	0.376513	-0.197931	0.733875	0.885301	10
Q96SM3	CPXM1	CPXM1	#N/A	#N/A	Probable carboxypeptidase X1	-0.692595	-0.251814	0.799999	0.58246	0.660837	-0.229738	0.788435	-0.338196	0.732095	0.232777	8
Q9P031;F8VNY5	CCDC59	CCDC59	#N/A	#N/A	Thyroid transcription factor 1-associated protein 26			1.04383	0.267955	0.326767	0.364124	-0.337612	-0.343842	0.729401	0.316841	6
J3QRU4;F8WCA0;L7N2F9;P63027;K7ENK9;K7EKX0	VAMP2;VAMP3	VAMP2	#N/A	#N/A	Vesicle-associated membrane protein 2			0.671112	0.243547	0.782912	-0.475836	0.273576	-0.603994	0.728095	-0.0717623	8
H0Y507;Q5TCZ1	SH3PXD2A	SH3PXD2A	#N/A	#N/A	SH3 and PX domain-containing protein 2A	1.24452	0.368489	0.676899	0.0384361	0.762902	-0.129781	0.735782	0.365692	0.720541	-0.0432222	6
Q86VQ1	GLCCI1	GLCCI1	#N/A	#N/A	Glucocorticoid-induced transcript 1 protein	0.315334	0.374956	0.55159	0.0716254	0.867659	0.173639	1.42196	0.354114	0.718263	0.123534	14
Q5SPY9;Q9NQX5	NPDC1	NPDC1	#N/A	#N/A	Neural proliferation differentiation and control protein 1	0.0805212	-0.00994548	0.619836	0.238053	0.804714	-0.215848	0.584193	-0.510087	0.715234	0.0288803	6
Q969S9	GFM2	GFM2	Known mitochondrial	#N/A	Ribosome-releasing factor 2, mitochondrial	-0.947862	-0.124802	1.14163	0.297367	0.105142	-0.437408	0.160275	-0.145797	0.714531	-0.023739	21
Q5JR08;P08134;E9PQH6;Q5JR07;Q5JR05;U3KQA9;U3KQV3;Q5JR06;E9PN11	RHOC	RHOC	#N/A	Peroxisomedb	Rho-related GTP-binding protein RhoC	0.644595	-0.0137566	0.506907	-0.214759	0.89507	-0.147873	0.652234	-0.41573	0.714004	-0.180929	14
P28799;K7EKL3	GRN	GRN	#N/A	#N/A	Granulins;Acrogranin;Paragranulin;Granulin-1;Granulin-2;Granulin-3;Granulin-4;Granulin-5;Granulin-6;Granulin-7	0.171847	0.0251707	0.690283	0.0448837	0.722728	0.11929	0.573665	0.00690831	0.706597	0.0825663	11
H3BM67;H3BUP2;H3BUN4;O60936	NOL3	NOL3	Known mitochondrial	#N/A	Nucleolar protein 3	0.636729	-0.211531	0.69893	-0.139856	0.71264	-0.359212	0.51005	-0.408244	0.705801	-0.245369	7
Q15836	VAMP3	VAMP3	#N/A	#N/A	Vesicle-associated membrane protein 3	0.469678	-0.171044	0.793938	0.00877379	0.611361	-0.158188	0.652418	-0.33825	0.705536	-0.0722931	8
Q96HN2;H0Y8B3	AHCYL2	AHCYL2	#N/A	#N/A	Putative adenosylhomocysteinase 3;Adenosylhomocysteinase	0.376179	0.163628	0.70982	0.449641	0.698841	-0.6293	0.435202	-0.264409	0.704341	0.00876651	19
Q8WWM9;K7EMC7	CYGB	CYGB	#N/A	#N/A	Cytoglobin	0.74028	-0.113536	0.774165	-0.0564462	0.630405	-0.106032	0.752064	-0.271618	0.704075	-0.0810262	18
Q9UHL4	DPP7	DPP7	#N/A	#N/A	Dipeptidyl peptidase 2	0.394843	-0.187921	0.583038	-0.144202	0.801076	-0.109935	0.634872	-0.435183	0.696172	-0.126966	21
P80370	DLK1	DLK1	#N/A	#N/A	Protein delta homolog 1;Fetal antigen 1	-1.42341	-0.411925	0.549324	-0.764739	0.804549	-0.590919	0.844868	-0.576153	0.682573	-0.675212	12
Q7Z7F0	KIAA0907	KIAA0907	#N/A	#N/A	UPF0469 protein KIAA0907	-0.18164	0.214622	-0.104604	0.0745054	1.18669	0.294665	-0.108285	0.258338	0.680936	0.188781	8
Q9UMR5;A0A0G2JIU6;A0A024RCQ8;A0A0G2JH76;A0A0G2JLA3;A0A0G2JLL3;A0A140T9Y1;A0A0G2JKR3;A0A0G2JHB6;A0A0G2JK02;G8JLL2;A0A140T8X7	PPT2;hCG_1999928	PPT2	#N/A	#N/A	Lysosomal thioesterase PPT2	0.0506061	-0.0388953	0.838589	0.0137839	0.500802	0.0439044	0.320658	-0.0091613	0.679559	0.0289227	5
H0Y4B0;O43414;A0A3B3ISV9;F6QUN3	ERI3	ERI3	#N/A	#N/A	ERI1 exoribonuclease 3	0.864969	0.290542	1.15147	1.0439	-0.0276014	-0.253825	0.0607391	-0.00566651	0.679176	0.536287	8
A6NMH6;Q92599	SEPT8	SEPT8	#N/A	#N/A	Septin-8	0.757365	-0.0160014	0.644779	0.195474	0.709379	-0.0699666	0.36087	0.0082	0.677441	0.0688497	17
Q9UIQ6	LNPEP	LNPEP	#N/A	#N/A	Leucyl-cystinyl aminopeptidase;Leucyl-cystinyl aminopeptidase, pregnancy serum form			0.293959	-0.289157	0.977829	0.101112	0.0114957	-0.336774	0.676042	-0.0808659	8
P16219;E9PE82	ACADS	ACADS	Known mitochondrial	#N/A	Short-chain specific acyl-CoA dehydrogenase, mitochondrial	0.521051	0.334911	0.951364	-0.157753	0.334111	0.145612	1.09241	-0.689497	0.6755	0.00188868	11
P13591;A0A087WWD4;A0A087WX77;A0A087WV75	NCAM1	NCAM1	#N/A	#N/A	Neural cell adhesion molecule 1	0.169155	-0.147921	0.514198	-0.0418478	0.808261	-0.149585	0.736129	-0.278496	0.668709	-0.0947107	40
O00308	WWP2	WWP2	#N/A	#N/A	NEDD4-like E3 ubiquitin-protein ligase WWP2	-1.13527	-0.931315	-0.110199	-0.303472	1.17025	1.70439	3.07425	2.62223	0.667647	1.02475	7
I3L170	MAPT	MAPT	#N/A	#N/A	Microtubule-associated protein	0.0935602	0.0603242	0.55336	0.0201999	0.770279	-0.17158	0.776525	-0.165515	0.665893	-0.0725055	20
Q8IW45	CARKD	CARKD	Known mitochondrial	#N/A	ATP-dependent (S)-NAD(P)H-hydrate dehydratase	0.246226	0.317188	0.234011	-0.0436459	0.993058	-0.299596	0.333424	-0.221724	0.662889	-0.165952	11
P10301	RRAS	RRAS	#N/A	#N/A	Ras-related protein R-Ras	-0.0277926	-0.0432445	0.0703893	-0.00810176	1.08134	0.223299	0.656359	-0.755405	0.662661	0.112233	7
Q5H9L2	TCEAL5	TCEAL5	#N/A	#N/A	Transcription elongation factor A protein-like 5	0.410667	0.151599	0.675635	0.157173	0.640898	-0.0907569	0.590434	-0.21088	0.658371	0.0385275	7
P34059	GALNS	GALNS	#N/A	#N/A	N-acetylgalactosamine-6-sulfatase	0.335941	0.0461418	0.370834	-0.106482	0.893673	0.307895	0.747688	0.371615	0.65581	0.115533	9
Q96IU4;F8W9U3;B4DQI4	ABHD14B	ABHD14B	#N/A	#N/A	Alpha/beta hydrolase domain-containing protein 14B	0.802152	0.253505	0.775598	-0.138632	0.524064	-0.0676515	0.333538	0.189034	0.655306	-0.102705	8
P61024;Q9BZU3;Q5T179	CKS1B	CKS1B	#N/A	#N/A	Cyclin-dependent kinases regulatory subunit 1;Cyclin-dependent kinases regulatory subunit	-0.0097131	0.722728	1.39906	0.628914	-0.964967	0.530171	0.66939	1.28511	0.655164	0.580387	3
Q2TAA2;H7C5G1;C9JE02	IAH1	IAH1	#N/A	#N/A	Isoamyl acetate-hydrolyzing esterase 1 homolog	0.891186	0.419755	0.749148	0.200881	0.54962	-0.222532	0.461319	-0.188907	0.652831	0.0046524	14
Q56VL3	OCIAD2	OCIAD2	Known mitochondrial	#N/A	OCIA domain-containing protein 2	-1.08795	0.174406	1.21064	0.432639	-0.27174	0.161307	0.272501	0.23952	0.652014	0.303342	9
Q02156	PRKCE	PRKCE	Known mitochondrial	#N/A	Protein kinase C epsilon type	0.169925	-0.144855	0.332164	0.0139266	0.91265	-0.127384	0.355016	-0.0382285	0.651408	-0.0549992	10
P04899	GNAI2	GNAI2	#N/A	#N/A	Guanine nucleotide-binding protein G(i) subunit alpha-2	0.294782	-0.22923	0.489543	-0.0910181	0.794852	-0.156466	0.597412	-0.277796	0.650259	-0.123371	28
Q53FA7	TP53I3	TP53I3	#N/A	#N/A	Quinone oxidoreductase PIG3	0.919073	0.0646069	0.821955	0.386038	0.455229	0.104471	0.291132	0.404358	0.650213	0.252113	14
O96011	PEX11B	PEX11B	#N/A	Peroxisomedb	Peroxisomal membrane protein 11B	0.462785	-0.0757632	0.594931	0.087327	0.703189	0.242938	0.364797	-0.0713606	0.650075	0.167229	11
P01034	CST3	CST3	#N/A	#N/A	Cystatin-C	-0.160734	-0.510724	0.5144	0.0270125	0.773912	-0.653673	0.69332	-0.481545	0.649983	-0.273552	4
Q9H492	MAP1LC3A	MAP1LC3A	#N/A	#N/A	Microtubule-associated proteins 1A/1B light chain 3A	-0.00450825	-0.0866606	0.133695	-0.0994327	1.02538	-0.30718	0.471135	-0.516945	0.647361	-0.19957	6
Q9NT99;M0R2G0	LRRC4B	LRRC4B	#N/A	#N/A	Leucine-rich repeat-containing protein 4B	0.0313951	-0.0589838	0.931986	-0.19314	0.289834	-0.135618	0.296545	-0.239702	0.646347	-0.164092	13
P32856	STX2	STX2	#N/A	#N/A	Syntaxin-2	0.398131	0.133827	0.209765	0.0847447	0.97159	0.0970713	0.551983	0.333195	0.64039	0.0909212	6
Q9UHF1	EGFL7	EGFL7	#N/A	#N/A	Epidermal growth factor-like protein 7	-0.512699	-0.420955	-0.111835	-0.666485	1.1279	-0.448883	0.708585	-0.606628	0.63729	-0.553585	6
Q9C0H2	TTYH3	TTYH3	#N/A	#N/A	Protein tweety homolog 3	-0.479191	-0.0460271	0.675184	0.195474	0.597412	0.145482	0.612022	0.45386	0.636822	0.170694	6
A6NGW1;O95070;E9PIZ0;C9JST7	YIF1A	YIF1A	#N/A	#N/A	Protein YIF1A	0.24184	0.00144204	0.749835	0.148479	0.510759	0.399007	0.290778	-0.0475919	0.635244	0.279174	6
O00244;E5RGN3;E5RIM7	ATOX1	ATOX1	#N/A	#N/A	Copper transport protein ATOX1	0.0404014	-0.00283043	0.904966	0.141433	0.298306	0.0304067	0.38416	0.298658	0.633292	0.0869875	7
Q9HAZ1;B7ZL31;A0A087WX74	CLK4	CLK4	#N/A	#N/A	Dual specificity protein kinase CLK4	-0.0581726	0.0683268	0.200504	-0.370005	0.956577	0.0425042	-0.35452	0.170181	0.627513	-0.149057	3
Q9BQG2;E7EM93	NUDT12	NUDT12	#N/A	Peroxisomedb	Peroxisomal NADH pyrophosphatase NUDT12	0.754118	0.559932	0.696439	0.564817	0.554245	0.0422241	0.225768	0.204767	0.627093	0.327055	9
P15848;A0A2U3U034	ARSB	ARSB	#N/A	#N/A	Arylsulfatase B	0.480369	0.128689	0.585443	0.118493	0.66421	0.110096	0.659559	-0.0275279	0.625364	0.1143	16
Q9NUQ9;E5RI16	FAM49B	FAM49B	#N/A	#N/A	Protein FAM49B	0.566474	0.126444	0.734915	0.267716	0.500496	0.0250289	0.363676	0.0170667	0.622462	0.151469	21
O75955;A0A140T9R1;A2AB10;A2AB09;A2AB12;A0A140T9X0	FLOT1	FLOT1	#N/A	#N/A	Flotillin-1	-0.245095	-0.130744	0.41565	-0.0671527	0.802979	0.0475383	0.457752	-0.139538	0.622274	-0.00866777	34
Q9HCE1;Q5JR04	MOV10	MOV10	#N/A	#N/A	Putative helicase MOV-10	0.443288	0.0194884	0.534161	0.0647449	0.702835	-0.0241498	0.668482	-0.263196	0.620962	0.0209821	41
P23634	ATP2B4	ATP2B4	#N/A	#N/A	Plasma membrane calcium-transporting ATPase 4	0.360982	-0.0292936	0.40969	-0.226071	0.803971	-0.261206	0.0805212	-0.396536	0.620258	-0.243532	32
Q6PUV4	CPLX2	CPLX2	#N/A	#N/A	Complexin-2	0.575119	0.0257376	0.831391	0.0194884	0.371057	-0.116708	0.25084	-0.104806	0.619507	-0.047003	7
Q8N4Q0	ZADH2	ZADH2	Predicted mitochondrial	Peroxisomedb	Zinc-binding alcohol dehydrogenase domain-containing protein 2	-0.0946337	-0.161782	0.991535	0.153157	0.110497	-0.30091	0.379621	-0.134477	0.617251	-0.0560862	10
Q9Y6C2	EMILIN1	EMILIN1	#N/A	#N/A	EMILIN-1	-0.414922	-0.242328	0.399226	-0.26093	0.805375	-0.264547	0.550408	-0.174703	0.616546	-0.262737	25
P11216	PYGB	PYGB	#N/A	#N/A	Glycogen phosphorylase, brain form	0.580242	0.0850168	0.502738	0.0054719	0.721241	0.021764	0.651499	-0.175387	0.616122	0.0136409	70
Q9BW92;U3KQG0	TARS2	TARS2	Known mitochondrial	#N/A	Threonine--tRNA ligase, mitochondrial	-1.84109	-0.0599912	1.31944	0.471135	-0.821661	-0.362603	-0.0847009	-0.0503531	0.614234	0.113674	36
O94925	GLS	GLS	Known mitochondrial	#N/A	Glutaminase kidney isoform, mitochondrial	-1.09965	-0.0618874	1.14287	0.0865121	-0.229061	-0.0685287	-0.0765846	0.209017	0.614187	0.0110734	36
Q5VW38;G5E994	GPR107	GPR107	#N/A	#N/A	Protein GPR107	0.162726	0.148739	0.384381	0.328262	0.811307	0.487486	0.301822	-0.0786398	0.613579	0.41007	4
Q8N8A6	DDX51	DDX51	#N/A	#N/A	ATP-dependent RNA helicase DDX51	-0.211197	-0.23914	1.10467	0.270947	-0.141096	0.206518	-0.145621	0.112366	0.612272	0.239092	12
Q8NHP8	PLBD2	PLBD2	#N/A	#N/A	Putative phospholipase B-like 2;Putative phospholipase B-like 2 32 kDa form;Putative phospholipase B-like 2 45 kDa form	0.332164	-0.0530745	0.599699	0.0263043	0.623211	-0.00594166	0.538339	-0.0602619	0.611503	0.0102714	14
A6NKD9;H0YJE0	CCDC85C	CCDC85C	#N/A	#N/A	Coiled-coil domain-containing protein 85C			0.875308	0.189793	0.285816	0.200253	0.107152	-0.323353	0.610464	0.195033	6
C9JJX6;E9PDC3;O00192	ARVCF	ARVCF	#N/A	#N/A	Armadillo repeat protein deleted in velo-cardio-facial syndrome	0.69813	-0.0369994	0.477781	-0.0677423	0.72718	-0.137553	0.905659	-0.196459	0.607863	-0.102225	34
Q16775;H3BPK3	HAGH	HAGH	Known mitochondrial	#N/A	Hydroxyacylglutathione hydrolase, mitochondrial	0.267236	0.0464211	0.538737	-0.0362152	0.672018	-0.0268664	0.518737	-0.100902	0.606916	-0.0315332	12
A0A0G2JRQ5;P30711	GSTT1	GSTT1	#N/A	#N/A	Glutathione S-transferase theta-1	0.448372	-0.318092	0.490673	-0.987903	0.713784	-0.28372	0.66421	-0.132847	0.606537	-0.593267	6
P00167	CYB5A	CYB5A	Predicted mitochondrial	#N/A	Cytochrome b5	0.357158	-0.0884388	0.441484	-0.075368	0.753519	-0.0527902	0.85591	-0.223323	0.605921	-0.0640349	9
D6REY2;P23508;A0A096LPB3;A0A096LNU0	MCC	MCC	#N/A	#N/A	Colorectal mutant cancer protein			-0.00559408	-0.246909	1.0285	0.10044	-0.0160743	-0.409144	0.602186	-0.0628063	2
P42025	ACTR1B	ACTR1B	#N/A	#N/A	Beta-centractin	0.508733	0.091666	0.674099	0.358734	0.521453	-0.126344	0.370611	-0.585951	0.599794	0.136487	18
Q8WXD2	SCG3	SCG3	#N/A	#N/A	Secretogranin-3	-0.253653	0.0060466	0.627327	-0.0666842	0.57056	-0.146228	0.561693	-0.226831	0.599223	-0.105908	30
A0A1B0GVD5;A0A1B0GWE8;P07339;A0A1B0GW44;A0A1B0GVP3;A0A1B0GV23;A0A1B0GU92;A0A1B0GU03;C9JH19;H7C469;F8WD96	CTSD	CTSD	#N/A	#N/A	Cathepsin D;Cathepsin D light chain;Cathepsin D heavy chain	0.412294	0.208892	0.653427	0.117562	0.542506	-0.110698	0.46999	-0.138918	0.599032	0.0079418	25
O95336;M0R261	PGLS	PGLS	#N/A	#N/A	6-phosphogluconolactonase	0.707702	0.193961	0.63988	0.126312	0.554147	-0.172441	0.469365	-0.115441	0.59765	-0.015345	19
Q8N3D4	EHBP1L1	EHBP1L1	#N/A	#N/A	EH domain-binding protein 1-like protein 1	0.430178	-0.0920326	0.364124	-0.863074	0.795019	-0.395397	0.311619	-0.49602	0.595599	-0.610367	10
Q9HCU4	CELSR2	CELSR2	#N/A	#N/A	Cadherin EGF LAG seven-pass G-type receptor 2	-0.21414	0.157303	0.612117	0.221444	0.578214	-0.235875	0.511873	-0.293147	0.595265	0.01083	11
H3BP20;P06865;H3BS10	HEXA	HEXA	#N/A	#N/A	Beta-hexosaminidase;Beta-hexosaminidase subunit alpha	0.380729	0.0106367	0.553557	-0.0549017	0.631989	-0.0683926	0.455965	-0.244429	0.593306	-0.0616314	17
Q86UP2	KTN1	KTN1	#N/A	#N/A	Kinectin	0.349365	-0.133828	0.626019	-0.0429769	0.558366	-0.086584	0.517628	-0.128283	0.592589	-0.0646157	145
P07686;Q5URX0	HEXB	HEXB	#N/A	#N/A	Beta-hexosaminidase subunit beta;Beta-hexosaminidase subunit beta chain B;Beta-hexosaminidase subunit beta chain A	0.295488	-0.0922786	0.45133	-0.0501887	0.720716	-0.0497257	0.528671	-0.153318	0.592302	-0.0499572	23
P35237	SERPINB6	SERPINB6	#N/A	#N/A	Serpin B6	0.497229	0.174534	0.831067	0.295958	0.305329	-0.108627	0.264717	-0.051743	0.592014	0.107802	28
P10415	BCL2	BCL2	Known mitochondrial	#N/A	Apoptosis regulator Bcl-2	-0.235008	0.275245	0.872395	0.743041	0.242572	0.170181	0.0494913	0.0458623	0.591584	0.48486	4
Q9Y4G6;A0A1B0GVU7;H0YMT1	TLN2	TLN2	#N/A	#N/A	Talin-2	0.390338	0.169925	0.515309	0.206268	0.662388	0.212383	0.671022	0.250719	0.590722	0.209329	107
Q9P2T1;A0A087WWM4;H0YNJ6;F8WAN9;H0YMB3;H0YLV5	GMPR2	GMPR2	#N/A	#N/A	GMP reductase 2;GMP reductase	0.424062	0.0820213	0.653152	0.164786	0.524465	-0.251109	0.326192	-0.0608788	0.590243	-0.0282265	21
E9PMH5;Q13490;A0A087X2B2;H0YDY3	BIRC2	BIRC2	#N/A	#N/A	Baculoviral IAP repeat-containing protein 2	0.451224	0.130008	0.751806	-0.260463	0.40719	0.0413831	0.248656	0.068602	0.589763	-0.10166	8
Q14012;H7C071	CAMK1	CAMK1	#N/A	#N/A	Calcium/calmodulin-dependent protein kinase type 1	0.846313	0.417272	0.431463	0.399663	0.731183	-0.0511301	0.30871	-0.384753	0.589092	0.191803	7
Q7L099	RUFY3	RUFY3	#N/A	#N/A	Protein RUFY3	0.213378	0.0574155	0.0997664	-0.151218	0.953749	-0.103937	0.717298	-0.46927	0.589044	-0.127384	28
Q8IXQ4;A0A0A0MRI1	GPALPP1	GPALPP1	#N/A	#N/A	GPALPP motifs-containing protein 1	0.288772	0.249506	1.00777	0.727354	-0.00414652	-0.00453715	0.0710762	-0.0506518	0.588771	0.407331	11
P11234;C9J6B1;C9JQB3;C9JYR1	RALB	RALB	#N/A	#N/A	Ras-related protein Ral-B	0.0608775	-0.237779	0.519944	-0.00135681	0.654436	-0.191145	0.549127	-0.271426	0.588757	-0.0931325	16
P51452;K7ES89	DUSP3	DUSP3	#N/A	#N/A	Dual specificity protein phosphatase 3	0.609471	0.36042	0.442652	0.0941009	0.721329	-0.000216456	0.667574	-0.0335105	0.588709	0.0477128	11
Q9H9J4;C9JPC9	USP42	USP42	Predicted mitochondrial	#N/A	Ubiquitin carboxyl-terminal hydrolase 42	-0.0293377	-0.561452	0.132643	-0.0633338	0.92964	-0.122036	0.236829	0.216362	0.585491	-0.0923863	6
P05023	ATP1A1	ATP1A1	#N/A	#N/A	Sodium/potassium-transporting ATPase subunit alpha-1	0.364572	-0.216418	0.593497	-0.169404	0.576764	-0.191063	0.566766	-0.342836	0.585155	-0.180193	56
O94819	KBTBD11	KBTBD11	#N/A	#N/A	Kelch repeat and BTB domain-containing protein 11	0.184852	-0.015345	0.219339	-0.337867	0.870582	-0.00797119	0.89173	-0.111882	0.581399	-0.16351	28
Q9UK08	GNG8	GNG8	#N/A	#N/A	Guanine nucleotide-binding protein G(I)/G(S)/G(O) subunit gamma-8	0.141302	-0.191195	0.169412	-0.322632	0.900336	-0.167005	0.661111	-0.673325	0.580676	-0.242721	10
Q13572;G3V588;G3V5A3;G3V3C0;G3V4M9	ITPK1	ITPK1	#N/A	#N/A	Inositol-tetrakisphosphate 1-kinase	0.268315	0.329526	0.378955	0.103665	0.757279	0.718789	0.783918	-0.245882	0.580483	0.443766	8
Q7Z4H3	HDDC2	HDDC2	Predicted mitochondrial	#N/A	HD domain-containing protein 2	0.929564	0.171463	0.80331	0.53067	0.315334	0.0200577	0.194339	0.165815	0.579856	0.297837	9
O43567;C9J8T4;C9JYN7;C9JRV0;F8WDJ5;C9J383	RNF13	RNF13	#N/A	#N/A	E3 ubiquitin-protein ligase RNF13	2.19311	0.212632	0.639325	0.364797	0.516318	0.363115			0.579132	0.363956	4
Q14061;H7C4E5;C9J8T6	COX17	COX17	Known mitochondrial	#N/A	Cytochrome c oxidase copper chaperone	-0.623487	-0.311775	0.941707	0.438719	0.0930192	-0.298549	0.121148	-0.182279	0.57889	0.116677	4
C9JEJ2;P49585;C9J050;H7C1T3;C9J2E1	PCYT1A	PCYT1A	#N/A	#N/A	Choline-phosphate cytidylyltransferase A	0.498557	0.400101	0.495388	0.115965	0.657366	0.0467006	0.461214	-0.600949	0.578649	0.0817486	13
P61916;J3KMY5;G3V3E8;E7EMS2;G3V3D1;H0YIZ1;G3V2V8	NPC2	NPC2	#N/A	#N/A	Epididymal secretory protein E1	0.297367	0.00129789	0.489132	-0.18531	0.661294	-0.039177	0.711583	-0.204798	0.577779	-0.110394	11
A8MWY0;C9JA41;H7C2N5	KIAA1324L	KIAA1324L	#N/A	#N/A	UPF0577 protein KIAA1324-like			0.266037	-0.255925	0.829606	-0.336901	0.774924	-0.0943718	0.575167	-0.295845	8
Q8NE01	CNNM3	CNNM3	#N/A	#N/A	Metal transporter CNNM3	0.214747	-0.00881285	0.523261	0.10675	0.620305	-0.0872428	0.338453	-0.0778783	0.572599	0.013012	21
A0A0C4DFZ2;P15289	ARSA	ARSA	#N/A	#N/A	Arylsulfatase A;Arylsulfatase A component B;Arylsulfatase A component C	0.300534	-0.0879633	0.335826	-0.301266	0.77197	-0.166406	0.560813	-0.539415	0.570317	-0.23226	7
Q8N9N7;A0A3B3ISV5;H3BSW0	LRRC57	LRRC57	#N/A	#N/A	Leucine-rich repeat-containing protein 57	0.40806	0.154324	0.647361	0.394734	0.487589	-0.0191557	0.370164	-0.123827	0.569686	0.202581	9
P30046;B5MC82;A6NHG4;J3KQ18	DDT;DDTL	DDT	Predicted mitochondrial	#N/A	D-dopachrome decarboxylase;D-dopachrome decarboxylase-like protein	0.766553	0.360083	0.679154	0.310922	0.448584	-0.162719	0.304277	-0.0956045	0.56847	0.093452	9
Q9UPY8;C9JB30	MAPRE3	MAPRE3	#N/A	#N/A	Microtubule-associated protein RP/EB family member 3	0.129876	0.00144204	0.386149	0.013355	0.725174	-0.065325	0.527271	-0.109219	0.565597	-0.0254486	20
P07602	PSAP	PSAP	Predicted mitochondrial	#N/A	Prosaposin;Saposin-A;Saposin-B-Val;Saposin-B;Saposin-C;Saposin-D	-0.12042	-0.0729683	0.701682	0.0949116	0.414244	0.161694	0.28948	-0.0359489	0.56511	0.128689	25
H3BTN5;H3BQ34	PKM	PKM	Predicted mitochondrial	#N/A	Pyruvate kinase	0.488104	0.370834	0.598365	0.423847	0.526369	-0.0937867	0.606537	0.328722	0.562816	0.188122	55
Q4KMQ2	ANO6	ANO6	#N/A	#N/A	Anoctamin-6	0.123534	-0.104061	0.48388	0.0144981	0.636822	-0.0608938	0.458907	-0.163995	0.562377	-0.0227054	23
P09104;F5H0C8	ENO2	ENO2	#N/A	#N/A	Gamma-enolase;Enolase	0.334568	0.0931545	0.454597	0.0480967	0.658371	-0.107228	0.477677	-0.165111	0.560079	-0.0274764	29
E9PJK1;E9PRJ8;H0YDL9;H0YDJ9;E9PIF1;A6NMH8;P60033	CD81	CD81	#N/A	#N/A	Tetraspanin;CD81 antigen	-0.168787	-0.235025	0.576764	-0.100082	0.542308	-0.231769	0.356595	-0.357973	0.559639	-0.164424	4
O95980	RECK	RECK	#N/A	#N/A	Reversion-inducing cysteine-rich protein with Kazal motifs			0.495286	-0.0925248	0.619836	0.0487942	0.752834	0.129613	0.558904	-0.0201356	2
Q9NRX4	PHPT1	PHPT1	#N/A	#N/A	14 kDa phosphohistidine phosphatase	0.561986	0.165815	0.454913	0.0326651	0.655352	-0.00689809	0.60046	0.0590784	0.558611	0.0130191	8
P51790;A0A087WU31;A0A0A0MTB7;E9PE15	CLCN3	CLCN3	#N/A	#N/A	H(+)/Cl(-) exchange transporter 3;Chloride channel protein	0.520447	-0.178257	0.467488	0.120617	0.642563	-0.169209	0.206268	-0.360194	0.55768	-0.0170301	15
A0A087X1G7;O60613;A0A3B3IT39	SELENOF	SELENOF	#N/A	#N/A	15 kDa selenoprotein	0.0250289	-0.36898	0.220825	0.132248	0.824238	0.141956	0.0423643	-0.0797676	0.553852	0.13711	6
Q9H1K1;F5H5N2;B4DNC9;B3KQ30	ISCU	ISCU	Known mitochondrial	#N/A	Iron-sulfur cluster assembly enzyme ISCU, mitochondrial	0.278223	-0.387714	1.06757	0.440421	-0.252776	-0.0453124	-0.225346	0.0578315	0.553449	0.217901	6
Q9HCM4	EPB41L5	EPB41L5	#N/A	#N/A	Band 4.1-like protein 5	0.122739	-0.498566	0.569588	-0.409144	0.533464	-0.355701	0.332278	-0.533472	0.551639	-0.382175	37
P28161;E9PHN7;E9PHN6;F6XZQ7;E9PLF1	GSTM2	GSTM2	#N/A	#N/A	Glutathione S-transferase Mu 2	0.787516	0.494364	0.767909	0.521553	0.296663	-0.075596	0.0106367	0.0720372	0.551442	0.253657	14
O94875;H7BXR3	SORBS2	SORBS2	#N/A	#N/A	Sorbin and SH3 domain-containing protein 2	-0.746253	-0.584717	-0.323353	0.0514416	1.08814	0.771379	1.05679	-0.0427391	0.54854	0.45586	9
P62745	RHOB	RHOB	#N/A	#N/A	Rho-related GTP-binding protein RhoB	0.590339	-0.125557	0.312665	-0.0969617	0.750349	0.0391384	0.662297	-0.147074	0.548042	-0.0273073	10
Q9NQS7	INCENP	INCENP	#N/A	#N/A	Inner centromere protein	-0.144664	-0.176675	0.136979	0.238665	0.867106	0.470615	-0.0987218	0.184471	0.547746	0.359296	9
Q99536	VAT1	VAT1	Predicted mitochondrial	#N/A	Synaptic vesicle membrane protein VAT-1 homolog	0.246955	-0.0178113	0.422879	-0.0229472	0.662479	-0.106374	0.494876	-0.287008	0.547647	-0.0640576	23
Q8IV38;G3V0G5	ANKMY2	ANKMY2	#N/A	#N/A	Ankyrin repeat and MYND domain-containing protein 2	0.20063	0.488412	0.379288	-0.129513	0.695994	-0.126486	0.893207	-0.140269	0.546314	-0.127999	9
Q9UJD0	RIMS3	RIMS3	Predicted mitochondrial	#N/A	Regulating synaptic membrane exocytosis protein 3	0.267236	0.195852	0.773152	0.446362	0.277032	0.0216219	0.0938305	-0.289845	0.546314	0.249567	5
Q96PY6	NEK1	NEK1	#N/A	#N/A	Serine/threonine-protein kinase Nek1	0.58602	-0.517874	0.597793	0.0920721	0.491699	0.0959919	0.152248	-0.286797	0.545721	0.0940333	9
P45974	USP5	USP5	#N/A	#N/A	Ubiquitin carboxyl-terminal hydrolase 5	0.319965	0.0765591	0.640251	-0.168155	0.441058	-0.375572	0.241474	-0.180904	0.54409	-0.268139	50
P00390	GSR	GSR	Known mitochondrial	#N/A	Glutathione reductase, mitochondrial	0.438612	0.132379	0.718438	0.246834	0.343123	0.00388999	0.196607	0.0082	0.542951	0.13047	24
P07384	CAPN1	CAPN1	#N/A	#N/A	Calpain-1 catalytic subunit	0.360308	-0.0464293	0.47467	-0.111477	0.604451	-0.171141	0.458802	-0.195897	0.541019	-0.141001	49
O75781	PALM	PALM	#N/A	#N/A	Paralemmin-1	0.116232	-0.152548	0.324926	-0.0900196	0.724563	-0.227304	0.689299	-0.311632	0.538538	-0.157029	21
Q14254;E7EMK3;J3QLD9	FLOT2	FLOT2	#N/A	#N/A	Flotillin-2	-0.32469	-0.234058	0.37128	-0.0604725	0.686164	-0.0261463	0.474877	-0.267028	0.537296	-0.0432073	39
A0A087WZY0;A0A1B0GTR6;A0A1B0GWJ7;A0A1C7CYZ2;A0A1B0GTV7;A0A1B0GUE8;A0A1B0GV94;A0A1B0GWI2;A0A0A0MRU5;A0A024R644;O75503;A0A1B0GVL0	CLN5	CLN5	#N/A	#N/A	Ceroid-lipofuscinosis neuronal protein 5	-0.305414	-0.081568	0.355242	0.0119249	0.698041	0.306379	0.424277	-0.0593296	0.536799	0.166651	4
P29353;X6R6D0	SHC1	SHC1	Known mitochondrial	#N/A	SHC-transforming protein 1	0.0936954	-0.226054	0.47176	-0.0693308	0.596554	-0.368942	0.413161	-0.514305	0.535506	-0.211373	28
C9JRL6;A0A0C4DGQ7;K7EIK7;O95834;K7EKU5	EML2	EML2	#N/A	#N/A	Echinoderm microtubule-associated protein-like 2			0.552869	0.125651	0.517528	0.575409	0.461529	-0.614713	0.535306	0.367986	9
Q86WG5	SBF2	SBF2	#N/A	#N/A	Myotubularin-related protein 13	0.203389	-0.413922	-0.162864	-0.333898	1.00324	-0.409872	0.129085	-0.314266	0.534933	-0.371385	8
B0QYH5;B7ZLJ8;Q9BYH1;B0QYH4	SEZ6L	SEZ6L	#N/A	#N/A	Seizure 6-like protein	-0.264374	-0.300786	0.444985	-0.201443	0.619272	-0.305806	0.473008	0.448901	0.534759	-0.252681	11
Q9Y5K6	CD2AP	CD2AP	#N/A	#N/A	CD2-associated protein	0.277509	0.142217	0.696261	0.0965318	0.352194	0.0492126	0.277985	-0.117146	0.53446	0.0730662	11
Q5SZQ8;H0Y623	CELF3	CELF3	#N/A	#N/A	CUGBP Elav-like family member 3	0.142087	0.0978804	0.322736	0.191057	0.715366	0.350837	0.596744	0.0221902	0.532367	0.273158	11
P10253	GAA	GAA	#N/A	#N/A	Lysosomal alpha-glucosidase;76 kDa lysosomal alpha-glucosidase;70 kDa lysosomal alpha-glucosidase	0.210888	-0.134635	0.421371	-0.162299	0.632547	-0.163446	0.463309	-0.336847	0.53082	-0.162872	38
Q75N03;C9J2P9	CBLL1	CBLL1	#N/A	#N/A	E3 ubiquitin-protein ligase Hakai	0.40294	-0.0860785	0.0270125	0.334454	0.90327	-0.052117	-0.189269	0.0518593	0.53067	0.154078	5
P20073	ANXA7	ANXA7	#N/A	#N/A	Annexin A7	0.498557	0.126841	0.575022	0.133432	0.484705	-0.0760066	0.289244	-0.0375768	0.53057	0.0325099	23
O75177	SS18L1	SS18L1	#N/A	#N/A	Calcium-responsive transactivator	0.449958	0.164014	0.345396	0.197991	0.694212	0.297367	0.385044	0.144438	0.53032	0.248535	4
Q9Y3Z3;A0A2R8YCS7;A0A2R8YD90	SAMHD1	SAMHD1	#N/A	#N/A	Deoxynucleoside triphosphate triphosphohydrolase SAMHD1	0.800827	0.0330882	0.607768	0.0114957	0.432746	0.175429	0.33674	0.109561	0.522909	0.0957894	27
O60888	CUTA	CUTA	Predicted mitochondrial	#N/A	Protein CutA	0.394295	0.165558	0.592062	0.1141	0.446574	0.0736831	0.261952	-0.093171	0.521151	0.0940333	7
Q9H330;F8WBJ7;H7C0G1	TMEM245	TMEM245	#N/A	#N/A	Transmembrane protein 245	0.0629506	-0.441027	0.389897	-0.287061	0.640528	-0.079036	0.505688	-0.365351	0.520649	-0.179302	6
O75828	CBR3	CBR3	#N/A	#N/A	Carbonyl reductase [NADPH] 3	0.398569	0.142217	0.418568	-0.288346	0.614192		-0.568345		0.519693		9
Q9NZ43;G8JLK1;M0QZE0;M0QYT5	USE1	USE1	#N/A	#N/A	Vesicle transport protein USE1	0.282736	0.000288558	0.608904	0.190046	0.424062	0.0886844	0.54409	-0.00093804	0.519441	0.140255	6
A0A087WW40;Q9Y371	SH3GLB1	SH3GLB1	Known mitochondrial	#N/A	Endophilin-B1	0.376846	-0.00831944	0.397803	-0.0562512	0.630778	-0.0657326	0.369941	-0.164318	0.518988	-0.0609841	13
X6R5C5;X6R8A1;P10619	CTSA	CTSA	#N/A	#N/A	Carboxypeptidase;Lysosomal protective protein;Lysosomal protective protein 32 kDa chain;Lysosomal protective protein 20 kDa chain	0.393636	0.0323829	0.65416	0.285461	0.365581	-0.239856	0.499578	-0.0808659	0.517074	0.0465818	12
P12955;K7ES25	PEPD	PEPD	#N/A	#N/A	Xaa-Pro dipeptidase	0.512075	0.132379	0.686433	0.211884	0.317999	0.0261627	0.253989	0.0978804	0.513945	0.12201	33
E7ETU5;F6Y5H0;P29558	RBMS1	RBMS1	#N/A	#N/A	RNA-binding motif, single-stranded-interacting protein 1	0.534062	0.010923	0.370722	0.0230425	0.643856	0.277866	0.590339	0.0147838	0.513743	0.156073	6
A0A096LNX8;Q96GP6	SCARF2	SCARF2	#N/A	#N/A	Scavenger receptor class F member 2	-0.273814	-0.0821635	0.706553	-0.00153008	0.290306	0.0196308	0.287709	-0.633591	0.51339	0.00908914	10
Q6UWE0	LRSAM1	LRSAM1	#N/A	#N/A	E3 ubiquitin-protein ligase LRSAM1	0.0163537	0.0177795	0.226755	-0.162299	0.752235	0.1038	0.450485	-0.112288	0.513289	-0.0231232	18
O00165;E9PIQ7	HAX1	HAX1	Known mitochondrial	#N/A	HCLS1-associated protein X-1	-0.368495	-0.203153	0.527371	0.0357646	0.496616	-0.097008	0.0209111	-0.124141	0.512075	-0.0290948	9
P09471;H3BTM2	GNAO1	GNAO1	#N/A	#N/A	Guanine nucleotide-binding protein G(o) subunit alpha	0.0540844	-0.124204	0.352194	-0.0658534	0.655718	-0.0276897	0.532766	-0.219925	0.511923	-0.0466453	20
Q5TCQ9	MAGI3	MAGI3	#N/A	#N/A	Membrane-associated guanylate kinase, WW and PDZ domain-containing protein 3	0.0426443	0.114767	0.13014	-0.184228	0.809826	0.525868	-0.0375028	-0.460548	0.509645	0.214075	5
P16278;E7EQ29	GLB1	GLB1	#N/A	#N/A	Beta-galactosidase	0.214125	-0.0870896	0.440527	-0.0888684	0.572599	-0.151154	0.486354	-0.25658	0.508074	-0.119675	21
Q9H0R4;K7ER15;K7EQD2;K7EMY7	HDHD2	HDHD2	#N/A	#N/A	Haloacid dehalogenase-like hydrolase domain-containing protein 2	0.612871	0.108223	0.550704	0.0769695	0.4609	0.0207689	0.285106	-0.0644347	0.5065	0.0491429	14
Q96DG6	CMBL	CMBL	#N/A	#N/A	Carboxymethylenebutenolidase homolog	0.511772	0.0142124	0.635058	-0.0782895	0.364685	-0.200266	0.25411	-0.0887456	0.506196	-0.137989	17
O94811	TPPP	TPPP	#N/A	#N/A	Tubulin polymerization-promoting protein	0.104337	-0.274966	0.349931	-0.986073	0.645794	-0.184408	0.53436	-0.862942	0.505434	-0.53026	5
A0A3B3IS55;O14639;F8W8M4;A0A0A0MRL6;J3QSX6;A0A494C1P1;A0A494C1G0	ABLIM1	ABLIM1	#N/A	#N/A	Actin-binding LIM protein 1	0.904812	-0.014587	0.432853	-0.149953	0.573278	-0.186459	0.600555	0.00245056	0.504773	-0.16809	18
Q01970	PLCB3	PLCB3	#N/A	#N/A	1-phosphatidylinositol 4,5-bisphosphate phosphodiesterase beta-3	0.263155	-0.149457	0.46999	-0.069013	0.538439	-0.289686	0.459117	-0.302102	0.50462	-0.175134	54
Q8WX77	IGFBPL1	IGFBPL1	#N/A	#N/A	Insulin-like growth factor-binding protein-like 1	-0.409987	-0.017972	0.489029	-0.0348696	0.513491	-0.211815	0.514097	-0.295695	0.501312	-0.120631	12
A0A0A0MT32;P38571;Q5T073	LIPA	LIPA	#N/A	#N/A	Lysosomal acid lipase/cholesteryl ester hydrolase	-0.0142227	-0.177735	0.469573	-0.205031	0.531868	0.206268	0.320542	0.115699	0.501057	0.0152263	6
P13929;E5RGZ4;K7EPM1;K7EKN2	ENO3	ENO3	#N/A	#N/A	Beta-enolase;Enolase	-0.087856	-0.161008	0.25544	0.158466	0.710437	-0.243182	0.363451	-0.260584	0.500802	-0.0284252	12
J3KQV8;O43426;C9JFZ1;A0A0D9SGJ6;J3KPK1;C9JW66	SYNJ1	SYNJ1	#N/A	#N/A	Synaptojanin-1	0.1333	-0.15645	0.338453	0.355918	0.644133	0.0588013	0.595504	0.0500489	0.499374	0.214995	11
O14657	TOR1B	TOR1B	#N/A	#N/A	Torsin-1B	0.115033	-0.0447318	0.614003	0.0768327	0.372841	-0.0999891	0.360758	-0.17145	0.498455	-0.00887091	10
Q2Y0W8	SLC4A8	SLC4A8	#N/A	#N/A	Electroneutral sodium bicarbonate exchanger 1			0.0507454	-0.621289	0.83649	-0.307751	0.861161	-0.593681	0.496462	-0.456019	9
Q9HBR0	SLC38A10	SLC38A10	#N/A	#N/A	Putative sodium-coupled neutral amino acid transporter 10	-0.0642989	-0.328978	0.781234	-0.258511	0.137241	0.0969364	0.475085	0.15069	0.494876	-0.0698683	8
Q9UHG3;F8W8W4	PCYOX1	PCYOX1	#N/A	#N/A	Prenylcysteine oxidase 1	0.143132	-0.181002	0.359296	-0.128346	0.617393	-0.0813237	0.438612	-0.134667	0.494108	-0.104643	23
Q08209;E7ETC2	PPP3CA	PPP3CA	#N/A	#N/A	Serine/threonine-protein phosphatase 2B catalytic subunit alpha isoform;Serine/threonine-protein phosphatase	0.423309	0.118758	0.532467	0.147176	0.454176	0.0102069	0.345851	-0.0563712	0.493852	0.0803165	24
O75051	PLXNA2	PLXNA2	#N/A	#N/A	Plexin-A2	0.257735	0.232292	0.385486	0.0433446	0.593784	0.0701146	0.488309	0.0333701	0.493391	0.0567917	33
M0R2A0;Q5UCC4	EMC10	EMC10	#N/A	#N/A	ER membrane protein complex subunit 10	0.4959	0.090718	0.694657	0.222557	0.256286	0.0882773	0.169284	0.117695	0.492058	0.156979	4
A8MXV4	NUDT19	NUDT19	Known mitochondrial	#N/A	Nucleoside diphosphate-linked moiety X motif 19, mitochondrial	-0.15266	-0.0995872	0.786011	0.199123	0.118891	-0.0349287	0.154972	-0.0650684	0.490673	0.0868381	14
Q08722;A0A2R8Y484	CD47	CD47	#N/A	#N/A	Leukocyte surface antigen CD47	0.291368	-0.144951	0.433387	-0.00810176	0.545474	0.0281448	0.287591	-0.242072	0.490519	0.0101354	7
Q9H857	NT5DC2	NT5DC2	Known mitochondrial	#N/A	5-nucleotidase domain-containing protein 2	-0.936221	-0.170995	0.655901	-0.131914	0.303342	0.00273846	0.590243	-0.106964	0.490365	-0.0630173	32
Q06136;K7ERC8;K7EQS7	KDSR	KDSR	#N/A	#N/A	3-ketodihydrosphingosine reductase	0.0533895	0.00475299	0.254715	-0.11466	0.690104	-0.0728317	0.356369	-0.0354609	0.488772	-0.0935942	10
Q13207	TBX2	TBX2	#N/A	#N/A	T-box transcription factor TBX2	0.543793	-0.00965501	0.508733	0.232783	0.468114	0.0713507	-0.0109482	-0.0959283	0.488566	0.154324	13
Q96KS9	FAM167A	FAM167A	#N/A	#N/A	Protein FAM167A			0.35682	0.13014	0.606442	0.0802483	0.410124	-0.263109	0.487023	0.10541	3
Q16342;J3QK82;A0A087WYJ3;F5H4V9	PDCD2	PDCD2	#N/A	#N/A	Programmed cell death protein 2			0.930775	-0.364886	-0.160395	0.130667	0.103665	0.121546	0.485983	-0.095936	3
Q9H0E2;E7EN89;F2Z2Y8;E9PP67;E9PQ25	TOLLIP	TOLLIP	#N/A	#N/A	Toll-interacting protein	0.210264	-0.0858642	0.422233	0.0214797	0.541118	-0.101335	0.41792	0.0186342	0.4829	-0.0386212	11
Q7L266;A0A087WUG3	ASRGL1	ASRGL1	#N/A	#N/A	Isoaspartyl peptidase/L-asparaginase;Isoaspartyl peptidase/L-asparaginase alpha chain;Isoaspartyl peptidase/L-asparaginase beta chain	0.245252	0.255924	0.52085	0.487075	0.436588	-0.0836457	0.487898	0.369606	0.479334	0.229754	8
P50416	CPT1A	CPT1A	Known mitochondrial	#N/A	Carnitine O-palmitoyltransferase 1, liver isoform	0.359971	-0.213437	0.408929	-0.145238	0.546166	-0.0254707	0.597126	-0.0924017	0.479179	-0.084112	41
O15258;Q5T092;A0A0A0MR06;Q5T091	RER1	RER1	#N/A	#N/A	Protein RER1	0.299948	-0.138553	0.408603	0.0690147	0.542902	0.00317045	-0.0889144	-0.13046	0.477315	0.0364682	5
J3QS47;J3QRH5;J3KSL5;F5H757;P49447	CYB561	CYB561	#N/A	#N/A	Cytochrome b561	0.379954	-0.76702	0.345623	-0.0699666	0.596267	-0.210847	0.791272	-0.250646	0.476382	-0.138688	4
Q9UKU7	ACAD8	ACAD8	Known mitochondrial	#N/A	Isobutyryl-CoA dehydrogenase, mitochondrial	0.376068	0.310456	0.623586	0.326077	0.309642	0.00561564	0.55336	-0.196294	0.475137	0.174726	10
O94760;B4DYP1	DDAH1	DDAH1	#N/A	#N/A	N(G),N(G)-dimethylarginine dimethylaminohydrolase 1	0.216113	-0.0254119	0.276913	-0.131345	0.648281	-0.205746	0.411426	-0.301124	0.474514	-0.168066	30
Q5H8A4;E7EM50;E7EWV1;D6RFE8	PIGG	PIGG	#N/A	#N/A	GPI ethanolamine phosphate transferase 2	0.259785	-0.374281	0.528271	-0.0508013	0.41846	-0.0132323	0.271545	-0.175191	0.47441	-0.0318945	10
Q9P0R6;G3V4I5	GSKIP	GSKIP	#N/A	#N/A	GSK3-beta interaction protein	0.110096	0.0915306	0.363451	0.108223	0.577151	0.175045	0.392977	0.195348	0.474254	0.142021	4
A0A0C4DGQ5;P04632;K7ELJ7;A0A075B7C0;U3KQE2;K7EKD8;K7EIV0;K7EM73;U3KPR7	CAPNS1	CAPNS1	#N/A	#N/A	Calpain small subunit 1	0.470407	0.147437	0.49774	-0.00781167	0.448161	-0.115238	0.388245	-0.0369402	0.473163	-0.0605252	18
Q70J99	UNC13D	UNC13D	#N/A	#N/A	Protein unc-13 homolog D	0.271904	-0.106716	0.45133	-0.187526	0.492315	-0.0152721	0.560421	-0.295588	0.471968	-0.09883	48
E9PBG3;Q9NQ86	TRIM36	TRIM36	#N/A	#N/A	E3 ubiquitin-protein ligase TRIM36	0.579373	-0.160669	0.403922	-0.195666	0.53107	-0.701529	-0.323101	-1.22705	0.468896	-0.426538	5
Q9BT73	PSMG3	PSMG3	#N/A	#N/A	Proteasome assembly chaperone 3	0.484808	0.167101	0.347552	0.107152	0.57947	0.0167816	0.0720372	0.0743684	0.468166	0.0626744	5
O43516;E9PB87	WIPF1	WIPF1	#N/A	#N/A	WAS/WASL-interacting protein family member 1	0.377735	0.23008	0.645794	0.147828	0.264717	-0.400435	0.348686	-0.259772	0.467801	-0.100414	6
Q03393;E9PKY8;E9PJM0;E9PNN3	PTS	PTS	Predicted mitochondrial	#N/A	6-pyruvoyl tetrahydrobiopterin synthase	0.189666	0.409798	0.62882	0.342441	0.285698	0.0807941	0.231187	-0.484994	0.467436	0.217541	6
Q9NQE9	HINT3	HINT3	#N/A	#N/A	Histidine triad nucleotide-binding protein 3			0.442758	0.300768	0.489132	0.146525	0.44159	0.167615	0.466131	0.225707	7
A6NDB9	PALM3	PALM3	#N/A	#N/A	Paralemmin-3	-0.217155	-0.409182	0.312665	-0.299223	0.604356	0.435202	0.810896	-0.398779	0.46587	0.114227	8
Q96FN4	CPNE2	CPNE2	#N/A	#N/A	Copine-2	0.288654	-0.101428	0.260869	0.0173518	0.644871	-0.0660347	0.719841	0.0206267	0.465609	-0.0237391	12
C9JP00;A0A0A0MQX8;Q9NR56;Q86VM6	MBNL1	MBNL1	#N/A	#N/A	Muscleblind-like protein 1	0.51783	0.0102069	0.265197	-0.227793	0.639973	-0.071967	0.624148	0.0753272	0.464721	-0.147777	11
P49748	ACADVL	ACADVL	Known mitochondrial	#N/A	Very long-chain specific acyl-CoA dehydrogenase, mitochondrial	-0.127006	-0.0526106	0.346758	-0.274634	0.57289	-0.172083	0.635429	-0.319532	0.46425	-0.222448	40
A0A0C4DG62;F8WCT1;Q66PJ3;F5GYV5;H7BZV4;F5H7X4;F8WEP2;A0A0C4DH18	ARL6IP4	ARL6IP4	#N/A	#N/A	ADP-ribosylation factor-like protein 6-interacting protein 4	0.184471	0.10044	0.452279	0.0487942	0.474047	0.0611541	0.141956	0.565987	0.463204	0.0549874	9
P54709	ATP1B3	ATP1B3	#N/A	#N/A	Sodium/potassium-transporting ATPase subunit beta-3	0.064469	-0.362863	0.440952	-0.16482	0.483261	0.0576928	0.35242	-0.0554414	0.462262	-0.0492778	8
O76024	WFS1	WFS1	#N/A	#N/A	Wolframin	0.463309	-0.174247	0.298072	-0.162315	0.606158	-0.0625049	0.522658	-0.116317	0.460323	-0.111547	19
P30043;M0R192;A0A2R8YEP4	BLVRB	BLVRB	#N/A	#N/A	Flavin reductase (NADPH)	0.524465	-0.0259701	0.170822	-0.201361	0.69964	0.0241777	0.284159	-0.477562	0.459327	-0.0841885	6
Q15773	MLF2	MLF2	#N/A	#N/A	Myeloid leukemia factor 2	-0.229501	0.24245	0.389677	0.433066	0.524665	1.84832	0.145482	-0.0955274	0.458749	1.30769	5
Q9UKS6;A0A0C4DGG1;E9PIY1	PACSIN3	PACSIN3	#N/A	#N/A	Protein kinase C and casein kinase substrate in neurons protein 3	-0.647242	-0.484752	0.789938	1.20408	0.0270125	0.161823	-0.00332206	-0.167653	0.45833	0.775093	11
Q00577	PURA	PURA	#N/A	#N/A	Transcriptional activator protein Pur-alpha	0.498353	0.268674	0.461529	0.138814	0.454071	-0.0498601	0.577054	0.0440444	0.457804	0.0475593	20
Q9BUH6	C9orf142	C9orf142	#N/A	#N/A	Protein PAXX	0.357833	0.119157	0.616264	0.235482	0.27965	-0.160169	0.330673	-0.0721491	0.457752	0.0511772	8
Q0JRZ9;H7BXJ4	FCHO2	FCHO2	#N/A	#N/A	F-BAR domain only protein 2	0.116232	0.0126402	0.486972	0.502229	0.427392	0.103531			0.457489	0.316609	5
O95861;A6NF51;F8W1J0	BPNT1	BPNT1	Predicted mitochondrial	#N/A	3(2),5-bisphosphate nucleotidase 1	0.461529	0.115699	0.534161	0.0959919	0.376179	-0.0325215	0.260387	-0.0168915	0.457332	0.0331657	21
P0DP25;P0DP24;P0DP23;H0Y7A7;E7ETZ0;E7EMB3;Q96HY3;G3V361	CALM2;CALM1	CALM2	#N/A	#N/A		0.120352	0.00374607	0.571337	0.110363	0.332164	0.016639	0.254836	0.0139266	0.456701	0.064262	15
Q53F19	C17orf85	C17orf85	#N/A	#N/A	Uncharacterized protein C17orf85	-0.0534488	0.0057592	0.194591	0.0257376	0.677801	0.51339	0.167615	0.0434844	0.456333	0.29007	17
O15143;C9JEY1;C9K057	ARPC1B	ARPC1B	#N/A	#N/A	Actin-related protein 2/3 complex subunit 1B	0.414352	0.0515809	0.300417	0.00590291	0.596076	-0.0342489	0.432211	-0.354575	0.455807	-0.0140333	28
D3YTI2	ACP1	ACP1	#N/A	#N/A		0.443288	0.182692	0.531569	0.218595	0.373732	-0.0489195	0.253263	0.0604624	0.454808	0.0910295	5
Q8WXF7	ATL1	ATL1	#N/A	#N/A	Atlastin-1	0.340505	0.0211954	0.177854	0.038998	0.685895	-0.0509208	0.584385	-0.149153	0.454123	-0.00526098	36
P10155	TROVE2	TROVE2	#N/A	#N/A	60 kDa SS-A/Ro ribonucleoprotein	0.403595	0.191184	0.52095	0.0496307	0.383829	-0.0131304	0.262072	-0.0757481	0.454018	0.0185914	39
G5E9Q8;C9JWV4;Q9H9Q4;H7C0G7	NHEJ1	NHEJ1	#N/A	#N/A	Non-homologous end-joining factor 1	0.496718	0.396817	0.707171	0.606537	0.141694	0.0326651	0.310689	0.102591	0.451963	0.347949	7
P41567;K7EM18	EIF1	EIF1	#N/A	#N/A	Eukaryotic translation initiation factor 1	-0.577487	0.0139266	0.562572	0.0746424	0.331361	0.234379	0.0994973	0.151079	0.451594	0.15672	13
B4E2Q0;P98194	ATP2C1	ATP2C1	#N/A	#N/A	Calcium-transporting ATPase;Calcium-transporting ATPase type 2C member 1	0.081885	-0.0884695	0.314639	0.0694271	0.575119	0.0990932	0.510557	-0.216954	0.450749	0.0843364	22
B1APY4;Q01974	ROR2	ROR2	#N/A	#N/A	Tyrosine-protein kinase transmembrane receptor ROR2	-0.334917	-0.300004	0.621618	-0.243387	0.256045	-0.233515	0.0583859	-0.316995	0.45038	-0.238442	8
Q6NTF9	RHBDD2	RHBDD2	#N/A	#N/A	Rhomboid domain-containing protein 2	0.18574	-0.0426499	0.394624	0.090447	0.503247	0.0102069	0.341758	-0.322235	0.449957	0.0508847	6
Q9H3H3	C11orf68	C11orf68	#N/A	#N/A	UPF0696 protein C11orf68	0.66257	0.651591	0.767401	0.425244	0.0408223	-0.577379	0.500292	-0.0964835	0.449377	0.00933286	7
P48728;B3KTU4;A0A1B0GTM2;A0A1B0GVP5;H0Y695;A0A1B0GTA8;A0A1B0GWC4;A0A1B0GUH1;A0A1B0GTB6;A0A1B0GTV8	AMT	AMT	Known mitochondrial	#N/A	Aminomethyltransferase, mitochondrial;Aminomethyltransferase	-0.0208088	-0.208244	0.489235	-0.110729	0.408168	-0.150273	0.854474	-0.023783	0.449271	-0.130365	14
Q9UGV2;F8WBF9	NDRG3	NDRG3	#N/A	#N/A	Protein NDRG3	0.330444	0.0308304	0.487281	0.169155	0.410233	0.107688	0.37362	0.0227584	0.449271	0.138749	18
Q8IVH8;F5H5A3	MAP4K3	MAP4K3	#N/A	#N/A	Mitogen-activated protein kinase kinase kinase kinase 3;Mitogen-activated protein kinase kinase kinase kinase	0.0648829	-0.225093	0.282025	0.138683	0.598175	0.171847	0.296663	-0.31883	0.448742	0.155361	10
O95425;A0A0J9YWY6	SVIL	SVIL	#N/A	#N/A	Supervillin	0.397255	0.399116	0.894992	0.0107799	-0.207295	-0.627873			0.446659	-0.273491	4
Q08623;E7EVH9	HDHD1	HDHD1	#N/A	#N/A	Pseudouridine-5-phosphatase	0.52095	0.181421	0.513996	0.195222	0.375846	-0.0995099	0.182438	-0.19159	0.446574	0.0553692	6
Q86SZ2;G3V2H7	TRAPPC6B	TRAPPC6B	#N/A	#N/A	Trafficking protein particle complex subunit 6B	0.332049	0.301119	0.366924	0.331934	0.521051	-0.097363	0.154583	-0.172392	0.446044	0.133195	9
P60174;U3KPZ0	TPI1	TPI1	Predicted mitochondrial	#N/A	Triosephosphate isomerase	0.338567	0.0913952	0.398241	0.0526941	0.491802	-0.0557412	0.346191	-0.0357418	0.44578	-0.00050503	35
P63096	GNAI1	GNAI1	#N/A	#N/A	Guanine nucleotide-binding protein G(i) subunit alpha-1	0.00877379	-0.238238	0.230203	-0.104279	0.633013	-0.118649	0.459956	-0.274756	0.445621	-0.111446	32
Q8NBI6;A0A140T9D0	XXYLT1	XXYLT1	#N/A	#N/A	Xyloside xylosyltransferase 1	0.274172	0.0968015	0.546265	0.250719	0.337083	0.0683268	0.244035	0.329755	0.445462	0.162403	14
Q9NUU6	FAM105A	FAM105A	#N/A	#N/A	Inactive ubiquitin thioesterase FAM105A	0.457016	0.138814	0.352758	0.065848	0.528371	0.0859685	0.169027	-0.151106	0.443235	0.0759433	18
R4GMU1;O95479	H6PD	H6PD	#N/A	#N/A	GDH/6PGL endoplasmic bifunctional protein;Glucose 1-dehydrogenase;6-phosphogluconolactonase	0.244278	-0.207644	0.397474	0.124725	0.485839	-0.228486	0.123534	-0.290127	0.442333	-0.041098	21
P63261;I3L3I0;I3L1U9;I3L4N8	ACTG1	ACTG1	#N/A	#N/A	Actin, cytoplasmic 2;Actin, cytoplasmic 2, N-terminally processed	0.464668	0.497229	0.453965	0.319387	0.42975	0.126576	0.339023	0.256045	0.441908	0.2262	48
Q06323	PSME1	PSME1	#N/A	#N/A	Proteasome activator complex subunit 1	0.317883	-0.0194189	0.467175	0.0142124	0.411969	-0.140746	0.299596	-0.159766	0.439836	-0.0611873	23
O60493	SNX3	SNX3	#N/A	#N/A	Sorting nexin-3	0.268913	0.0343565	0.503654	-0.160798	0.371838	0.00733906	0.423955	-0.150337	0.439251	-0.0742815	18
Q13724;A0A3B3IRK6;A0A3B3IRW2;C9J8D4	MOGS	MOGS	Predicted mitochondrial	#N/A	Mannosyl-oligosaccharide glucosidase	0.121015	-0.184785	0.280244	-0.22452	0.580339	-0.0953579	0.296898	-0.296102	0.43808	-0.158494	45
A0A0C4DH22;Q9H4G0	EPB41L1	EPB41L1	#N/A	#N/A	Band 4.1-like protein 1	0.284396	-0.183523	0.451752	-0.133385	0.423094	-0.0233285	0.584866	-0.0850222	0.437494	-0.0773074	22
Q5JSH3;H7BY83	WDR44	WDR44	#N/A	#N/A	WD repeat-containing protein 44	0.283803	-0.0118498	0.512176	0.0216219	0.358621	-0.23618	-0.0100327	-0.512802	0.437441	-0.101528	14
Q6ZN17;A0A1B0GVD3;A0A1B0GTK2	LIN28B	LIN28B	#N/A	#N/A	Protein lin-28 homolog B	0.75292	0.231924	0.437654	0.211137	0.434988	0.0699771	0.381173	-0.200382	0.436322	0.142283	8
Q8NBN3	TMEM87A	TMEM87A	#N/A	#N/A	Transmembrane protein 87A	-0.495491	0.0127833	0.304978	0.0233263	0.556307	-0.0476813	0.694925	0.275961	0.436109	-0.0117407	10
Q9C0C2	TNKS1BP1	TNKS1BP1	#N/A	#N/A	182 kDa tankyrase-1-binding protein	0.245739	-0.264651	0.543298	-0.0889605	0.319618	0.101784	0.539432	-0.225363	0.435789	0.00956212	32
O00186	STXBP3	STXBP3	#N/A	#N/A	Syntaxin-binding protein 3	0.381062	-0.187165	0.364572	-0.157061	0.502738	-0.0662612	0.160791	-0.186836	0.435309	-0.110947	22
P07311;G3V2U7	ACYP1	ACYP1	#N/A	#N/A	Acylphosphatase-1;Acylphosphatase	0.115033	0.0261627	0.490467	-0.0560562	0.374511	-0.0997418	0.221568	-0.195798	0.433654	-0.0777336	10
O43294;H3BQC4	TGFB1I1	TGFB1I1	#N/A	#N/A	Transforming growth factor beta-1-induced transcript 1 protein	-0.171872	0.46874	0.0739573	-0.114597	0.720716	-0.0457143	0.0629506	-0.305236	0.43328	-0.0797448	6
A0A0C4DGY3;A0A0C4DGX9;Q8TAM2;A0A0C4DGH8;A0A0C4DFT4;H0YJX0	TTC8	TTC8	#N/A	#N/A	Tetratricopeptide repeat protein 8	-0.267114	0.200002	0.639047	0.391108	0.192825	-0.101227	0.188021	-0.208878	0.43312	0.165841	7
Q9BX67	JAM3	JAM3	#N/A	#N/A	Junctional adhesion molecule C	-0.186229	-0.408474	0.347892	-0.277044	0.51339	-0.196641	0.111566	0.0581087	0.433013	-0.236282	2
P33527;I3L4X2;A0A0A0MS99	ABCC1	ABCC1	#N/A	#N/A	Multidrug resistance-associated protein 1	0.155102	-0.32072	0.441165	-0.1435	0.423417	-0.0455207	0.143393	-0.209678	0.432318	-0.0936789	38
Q99933;J3QTA2	BAG1	BAG1	#N/A	#N/A	BAG family molecular chaperone regulator 1	0.646716	0.098689	0.673285	0.254231	0.139993	-0.256769	0.401194	0.183836	0.431142	0.0212381	6
Q8ND76	CCNY	CCNY	#N/A	#N/A	Cyclin-Y	0.1149	-0.175371	0.445833	-0.0872582	0.413811	-0.231261	0.0740944	-0.388998	0.429911	-0.157464	5
F8VV59;F8W118;F8VRJ2	NAP1L1	NAP1L1	#N/A	#N/A		-0.133021	0.300534	-0.0988918	0.453755	0.815657	0.301705	-0.262694	-0.350559	0.429669	0.379732	19
A0A2R8Y6Z0;O15034;A0A2R8YFN7	RIMBP2	RIMBP2	#N/A	#N/A	RIMS-binding protein 2	0.287118	-0.167102	0.471448	0.0966667	0.386038	-0.142863	0.245131	-0.423275	0.429375	-0.0181327	14
P33897	ABCD1	ABCD1	Predicted mitochondrial	Peroxisomedb	ATP-binding cassette sub-family D member 1	0.148479	-0.120263	0.367483	-0.172295	0.487589	-0.0908029	0.482952	-0.392307	0.428786	-0.130974	13
Q96E17	RAB3C	RAB3C	#N/A	#N/A	Ras-related protein Rab-3C	0.268913	-0.120279	0.433066	-0.0385396	0.423847	0.00504059	0.474981	-0.174817	0.428464	-0.016585	11
P31150	GDI1	GDI1	#N/A	#N/A	Rab GDP dissociation inhibitor alpha	0.259544	0.0601858	0.314407	0.0812032	0.533563	-0.0805608	0.400975	-0.10355	0.428142	0.00258726	53
A0A087X165;Q9C0H9;A0A087WVV7	SRCIN1	SRCIN1	#N/A	#N/A	SRC kinase signaling inhibitor 1			0.737168		0.0340749	-0.446069	0.309875	0.243791	0.428035		9
O15231;H0Y704;H7BZT5	ZNF185	ZNF185	#N/A	#N/A	Zinc finger protein 185	0.0662615	-0.0802404	0.0301242	-0.386789	0.738898	-0.33825	0.703544	-0.383623	0.427606	-0.362316	17
P40763;G8JLH9	STAT3	STAT3	Known mitochondrial	#N/A	Signal transducer and activator of transcription 3;Signal transducer and activator of transcription	-0.346573	-0.244668	0.161436	-0.0827286	0.651591	-0.0669411	0.399882	-0.1628	0.427231	-0.0748133	28
O75382;A0A1W2PPI7	TRIM3	TRIM3	#N/A	#N/A	Tripartite motif-containing protein 3	0.416515	-0.0757024	0.319271	0.0827026	0.526269	-0.0642989	0.611172	-0.00613	0.426479	0.0110734	11
Q15438	CYTH1	CYTH1	#N/A	#N/A	Cytohesin-1	0.250234	-0.166794	0.386701	-0.178306	0.464877	-0.00101024	0.277866	-0.106653	0.426318	-0.0869363	7
O94964;H0YDM2;X6R3R3	SOGA1	SOGA1	#N/A	#N/A	Protein SOGA1;N-terminal form;C-terminal 80 kDa form	-0.763367	-0.0837527	0.066537	-0.0342933	0.71308	-0.078457	0.154194	1.44175	0.425728	-0.0562062	8
A0A087WZG4;A0A3B3IPE9;Q6ZSZ5;M0QZS0	ARHGEF18	ARHGEF18	#N/A	#N/A	Rho guanine nucleotide exchange factor 18	0.2806	-0.363457	-0.538807	0.0157831	0.99834	0.317073	0.0775164	-0.0999119	0.425481	0.174279	9
Q9Y692	GMEB1	GMEB1	#N/A	#N/A	Glucocorticoid modulatory element-binding protein 1	-0.285337	-0.00969855	0.164143	-0.243728	0.646624	0.631151	0.026021	0.469052	0.425459	0.259037	7
P83111	LACTB	LACTB	Known mitochondrial	#N/A	Serine beta-lactamase-like protein LACTB, mitochondrial	0.300534	-0.290886	0.109829	-0.28604	0.683202	0.385707	1.00669	-0.0452081	0.424815	0.0885826	9
P04406;E7EUT5	GAPDH	GAPDH	Predicted mitochondrial	#N/A	Glyceraldehyde-3-phosphate dehydrogenase	0.453439	0.137372	0.47228	0.221444	0.375623	0.0124972	0.272023	0.0697021	0.424761	0.12075	39
Q8NC56	LEMD2	LEMD2	#N/A	#N/A	LEM domain-containing protein 2	0.193709	0.0360461	0.392427	-0.101892	0.455439	-0.14519	0.473008	-0.101072	0.424277	-0.123379	21
Q9UJ83	HACL1	HACL1	#N/A	Peroxisomedb	2-hydroxyacyl-CoA lyase 1	0.240009	-0.303098	0.767146	0.313246	-0.0279544	0.117429	-0.0614056	0.214871	0.423691	0.218657	11
H3BU86;O14662;F8W9Z6;B7ZBM8	STX16-NPEPL1;STX16	STX16-NPEPL1	#N/A	#N/A	Syntaxin-16	0.00374607	-0.164998	0.313478	-0.0440921	0.524866	-0.149937	0.299479	-0.240486	0.42304	-0.0960439	15
B7ZC38;Q9NR46	SH3GLB2	SH3GLB2	#N/A	#N/A	Endophilin-B2	0.405121	0.0305479	0.280244	-0.134366	0.550999	-0.104775	0.427392	-0.200548	0.421964	-0.119495	21
Q9Y263;E5RIM3	PLAA	PLAA	#N/A	#N/A	Phospholipase A-2-activating protein	0.690283	0.0772429	0.420617	0.0557509	0.422879	0.018919	0.317536	0.026021	0.421748	0.0374525	42
Q9BV10;H7C5R7	ALG12	ALG12	#N/A	#N/A	Dol-P-Man:Man(7)GlcNAc(2)-PP-Dol alpha-1,6-mannosyltransferase	0.318809	0.106482	0.275484	0.10608	0.554147	-0.161653	0.193583	-0.189006	0.421533	-0.0215847	4
O15254	ACOX3	ACOX3	#N/A	Peroxisomedb	Peroxisomal acyl-coenzyme A oxidase 3	0.141825	0.263635	0.365469	0.016639	0.474774	-0.450006	0.360758	0.0177795	0.421156	-0.197898	6
P54252;F5H211;A0A2R8Y3X7;A0A087X1A8;D3VVH9;G3V3R7;A0A0A0MS38;A0A087WXY4;G3V4U9;E9PJN5;C9JQV6;G3V328;G3V2G1;S4R399;G3V526;G3V2G2;G3V3T6	ATXN3	ATXN3	#N/A	#N/A	Ataxin-3	-0.021819	-0.0392956	0.531668	-0.285548	0.301471	0.164014	0.642655	0.285225	0.421156	-0.0433263	7
Q9H299;Q5T123	SH3BGRL3	SH3BGRL3	#N/A	#N/A	SH3 domain-binding glutamic acid-rich-like protein 3	0.312781	0.000721115	0.308011	0.0360461	0.524766	-0.0247954	0.426748	0.0207689	0.420455	0.00594607	5
O94855;E9PDM8	SEC24D	SEC24D	#N/A	#N/A	Protein transport protein Sec24D	0.62742	0.0832474	0.489954	0.0321009	0.345623	-0.00984383	0.260026	0.0776532	0.419593	0.011281	33
Q5T6V5;Q5T6V7	C9orf64	C9orf64	#N/A	#N/A	UPF0553 protein C9orf64	0.315218	0.0918014	0.615793	0.252658	0.191815	-0.109639	0.171975	0.0156403	0.419323	0.0828525	22
O95865;A0A140T971;Q5SSV3;Q5SRR8;H0Y7N1	DDAH2	DDAH2	#N/A	#N/A	N(G),N(G)-dimethylarginine dimethylaminohydrolase 2	0.11023	0.0139266	0.27035	0.0716254	0.552672	-0.0972395	0.368824	-0.185638	0.418406	-0.0103378	22
Q96HD1	CRELD1	CRELD1	#N/A	#N/A	Cysteine-rich with EGF-like domain protein 1	0.278698	-0.180741	0.218595	-0.31493	0.593784	-0.0636202	0.520146	-0.399521	0.418352	-0.18381	13
O75368	SH3BGRL	SH3BGRL	#N/A	#N/A	SH3 domain-binding glutamic acid-rich-like protein	0.355806	0.0869197	0.635058	0.195474	0.162597	-0.15719	0.320311	0.101247	0.418082	0.029891	8
O15525	MAFG	MAFG	#N/A	#N/A	Transcription factor MafG	0.0866479	-0.176984	0.480679	-0.388355	0.351967	-0.00560858	0.260146	-0.248176	0.417758	-0.184326	5
E9PIM6;E9PNQ8;P04216;J3QRJ3	THY1	THY1	#N/A	#N/A	Thy-1 membrane glycoprotein	-0.0411945	-0.112069	0.281787	-0.0943565	0.539928	-0.289898	0.565792	-0.0441665	0.416624	-0.188817	4
P20962;F5H7R9;F5GXR3	PTMS	PTMS	#N/A	#N/A	Parathymosin	0.191942	0.0683268	0.442864	0.0994973	0.385818	-0.0829884	0.266037	-0.0963446	0.414623	0.0111378	4
Q8TCG5	CPT1C	CPT1C	#N/A	#N/A	Carnitine O-palmitoyltransferase 1, brain isoform	0.193961	-0.0121553	0.308943	0.0313951	0.512985	-0.525372	0.438506	-0.0323444	0.414569	-0.220295	9
H7C4G8	NT5DC2	NT5DC2	Known mitochondrial	#N/A		-1.0696	-0.191211	0.706111	0.227248	0.0472592	-0.125872	0.43189	-0.101954	0.413973	0.0614652	17
P35611;E7EV99;E7ENY0;A0A0A0MSR2	ADD1	ADD1	#N/A	#N/A	Alpha-adducin	0.126312	-0.0584279	0.277271	-0.169242	0.538538	-0.0524311	0.484499	-0.276642	0.413811	-0.109654	37
P31323	PRKAR2B	PRKAR2B	#N/A	#N/A	cAMP-dependent protein kinase type II-beta regulatory subunit	0.245861	0.129613	0.35682	0.0275787	0.467801	-0.000750383	0.357946	-0.02869	0.413377	0.0134837	19
A0MZ66	KIAA1598	KIAA1598	#N/A	#N/A	Shootin-1	0.169797	0.44615	0.291368	-0.087764	0.524766	0.0714881	0.539829	0.0422241	0.412781	-0.00594171	18
Q7L311	ARMCX2	ARMCX2	Predicted mitochondrial	#N/A	Armadillo repeat-containing X-linked protein 2	-0.128456	0.0352017	0.577634	-0.295606	0.225152	-0.137981	0.537644	-0.216568	0.412131	-0.214642	9
Q9BUF5;K7ESM5	TUBB6	TUBB6	#N/A	#N/A	Tubulin beta-6 chain	0.506399	0.0851526	0.292428	0.140909	0.521654	0.0801119	0.324465	0.0425042	0.411589	0.110831	30
Q3KQV9	UAP1L1	UAP1L1	#N/A	#N/A	UDP-N-acetylhexosamine pyrophosphorylase-like protein 1	0.439889	-0.0253679	0.382391	0.0473989	0.438612	-0.000620475	0.0915306	-0.0369994	0.410775	0.023589	16
A0A2R8Y7Q9;A0A2R8Y5S9;Q9Y5P4;A0A2R8YEK8;A0A2U3TZL3;A0A2R8YE18;A0A2R8Y7C5;A0A2R8Y5H3;A0A2R8YE59;A0A2R8YFA1;A0A2R8YEA4	COL4A3BP	COL4A3BP	#N/A	#N/A	Collagen type IV alpha-3-binding protein	0.406428	-0.0595851	0.192447	-0.207711	0.599508	-0.0624145	0.403377	-0.197931	0.410287	-0.133234	23
A0A1B0GUN5;Q5VTI5;Q9Y2H5	PLEKHA6	PLEKHA6	#N/A	#N/A	Pleckstrin homology domain-containing family A member 6	0.471448	-0.16351	0.424492	-0.192513	0.393965	-0.0633338	0.458382	-0.316618	0.409309	-0.126478	27
P19086	GNAZ	GNAZ	#N/A	#N/A	Guanine nucleotide-binding protein G(z) subunit alpha	-0.1121	-0.19555	0.168642	-0.373533	0.61438	-0.037636	0.145091	-0.482472	0.408658	-0.195831	13
Q96DX4	RSPRY1	RSPRY1	#N/A	#N/A	RING finger and SPRY domain-containing protein 1	-0.388374	-0.442556	0.763242	-0.395644	-0.0641329	-0.0576018	0.276318	-0.235025	0.40807	-0.216744	5
O95470	SGPL1	SGPL1	#N/A	#N/A	Sphingosine-1-phosphate lyase 1	0.189287	-0.0934788	0.251446	-0.137981	0.549226	0.00388999	0.40621	-0.15859	0.408005	-0.0653024	29
Q86WA6;Q49AI2;B4DML3	BPHL	BPHL	Predicted mitochondrial	#N/A	Valacyclovir hydrolase	0.277032	0.396269	0.71264	0.187008	0.0211954	-0.240009	0.408821	-0.111835	0.407951	-0.0107593	13
Q8N5G2	TMEM57	TMEM57	#N/A	#N/A	Macoilin			0.446044	-0.093602	0.367483	0.300417	-0.0951576	-0.266819	0.407298	0.116817	9
Q8TCD5;J3KRC4;J3KSX6	NT5C	NT5C	#N/A	#N/A	5(3)-deoxyribonucleotidase, cytosolic type	0.680594	0.527771	0.697062	0.444349	0.0415233	-0.335918	0.0284277	-0.198345	0.40621	0.106335	9
P09936;D6R956;D6RE83;D6R974	UCHL1	UCHL1	#N/A	#N/A	Ubiquitin carboxyl-terminal hydrolase isozyme L1;Ubiquitin carboxyl-terminal hydrolase	0.409147	0.148088	0.419647	0.128821	0.391878	-0.0737273	0.213627	-0.075824	0.405829	0.0310987	23
Q14247	CTTN	CTTN	#N/A	#N/A	Src substrate cortactin	0.210389	0.033652	0.535157	0.0281448	0.263515	-0.132578	0.352871	-0.0538232	0.40572	-0.0499796	52
P52943;H0YFA4;H0YHD8	CRIP2	CRIP2	#N/A	#N/A	Cysteine-rich protein 2	0.270589	0.0769695	0.318346	0.0160683	0.482229	-0.0496063	0.441908	-0.0580223	0.402613	-0.0163953	13
P35813	PPM1A	PPM1A	#N/A	#N/A	Protein phosphatase 1A	0.285343	0.0942361	0.355242	0.193456	0.448372	-0.09068	0.242084	-0.0504277	0.402558	0.0583719	24
O95671	ASMTL	ASMTL	#N/A	#N/A	N-acetylserotonin O-methyltransferase-like protein	0.206393	-0.0665331	0.139731	-0.391323	0.623305	-0.123795	0.474566	-0.190223	0.401685	-0.251367	21
O00159;F5H6E2	MYO1C	MYO1C	#N/A	#N/A	Unconventional myosin-Ic	0.066537	-0.183032	0.263876	-0.173661	0.526269	-0.10262	0.42191	-0.210563	0.40103	-0.137703	67
Q99611	SEPHS2	SEPHS2	#N/A	#N/A	Selenide, water dikinase 2			0.455018	0.154065	0.344601	-0.358583	0.240864	-0.369185	0.400866	-0.0796076	6
A0A384DVU0;Q8IY17	PNPLA6	PNPLA6	#N/A	#N/A	Neuropathy target esterase	0.120086	-0.0583378	0.27858	0.00748262	0.513289	-0.105691	0.445197	-0.219085	0.400702	-0.0479945	37
Q00169;F5GWE5;I3L4H1;I3L459	PITPNA	PITPNA	#N/A	#N/A	Phosphatidylinositol transfer protein alpha isoform	0.597221	0.0619835	0.429	0.193961	0.370834	0.145221	0.371838	0.162726	0.40021	0.169797	18
E9PDL4;A0A3B3IST8;Q05084;B9ZVM7;E7ENI6;Q6LCR0;C9J3Y4	ICA1	ICA1	#N/A	#N/A	Islet cell autoantigen 1	0.192699	0.215865	0.171463	0.208018	0.597317	0.185359	0.237564	-0.381104	0.400046	0.196733	14
Q96RU3;B7ZL14;H0Y7W6	FNBP1	FNBP1	#N/A	#N/A	Formin-binding protein 1	-0.186541	-0.0693308	0.407951	0.226508	0.388796	0.312781	0.360533	0.128029	0.398405	0.27029	12
Q969P0;C9J8Z4	IGSF8	IGSF8	#N/A	#N/A	Immunoglobulin superfamily member 8	-0.509615	-0.235025	0.111566	-0.382156	0.637471	-0.0926632	0.0377336	-0.931508	0.39835	-0.230161	12
Q14693	LPIN1	LPIN1	#N/A	#N/A	Phosphatidate phosphatase LPIN1	0.613909	0.103263	0.379732	-0.131835	0.416083	-0.0728621	0.549521	-0.158687	0.398022	-0.102047	25
Q9GZT4;I3L4B4	SRR	SRR	#N/A	#N/A	Serine racemase	0.243913	0.219835	0.747946	0.241962	-0.0651891	0.21176	0.551196	0.288063	0.397923	0.22694	8
Q8NAF0	ZNF579	ZNF579	#N/A	#N/A	Zinc finger protein 579	-0.31901	-0.0880707	0.305562	0.0553346	0.481609	0.409038	0.317767	0.374733	0.396269	0.242999	4
Q8NBX0	SCCPDH	SCCPDH	Known mitochondrial	#N/A	Saccharopine dehydrogenase-like oxidoreductase	0.35242	0.0446039	0.292782	0.028852	0.491186	0.0618453	0.451224	0.00532815	0.395392	0.045443	21
P61970;H3BRV9	NUTF2	NUTF2	#N/A	#N/A	Nuclear transport factor 2	0.522257	0.376179	0.550605	0.518938	0.220701	-0.179596	0.143524	0.0497701	0.395063	0.211542	7
Q5SNT2;H0Y4R5	TMEM201	TMEM201	#N/A	#N/A	Transmembrane protein 201	0.148348	0.0786098	0.435735	0.354791	0.352194	0.0594937	0.334911	-0.093602	0.394569	0.214684	5
O75843	AP1G2	AP1G2	#N/A	#N/A	AP-1 complex subunit gamma-like 2	0.376402	0.268554	0.133695	-0.205364	0.613815	-0.00147232	0.531868	-0.483178	0.393636	-0.0998191	8
F6U1T9;D3YTA9;P63098;H7BYZ3	PPP3R1	PPP3R1	#N/A	#N/A	Calcineurin subunit B type 1	0.432853	0.117429	0.432104	0.0720372	0.35242	-0.149489	0.200881	-0.0627159	0.392812	-0.0344779	7
P62942;Q5W0X3;A0A087WZM5	FKBP1A	FKBP1A	#N/A	#N/A	Peptidyl-prolyl cis-trans isomerase FKBP1A;Peptidyl-prolyl cis-trans isomerase	0.471968	0.243425	0.576377	0.233643	0.182311	-0.0595099	0.13829	0.0657101	0.392757	0.0944996	11
A0A2R8Y4H2;B1AHR1;Q9UH03	SEPT3	SEPT3	#N/A	#N/A	Neuronal-specific septin-3	-0.0934788	0.0246034	0.311852	0.256528	0.469261	0.179511	0.168514	0.152248	0.392702	0.218533	11
Q9UPQ0;D6RD46;H0Y8P3;G5EA03;E7EPK0;E9PDJ9	LIMCH1	LIMCH1	#N/A	#N/A	LIM and calponin homology domains-containing protein 1	0.536749	-0.174654	0.342555	-0.173677	0.440633	-0.126848	0.360308	0.0126402	0.392427	-0.150073	51
P17677	GAP43	GAP43	#N/A	#N/A	Neuromodulin	-0.242055	-0.132942	0.107286	-0.0447021	0.630126	-0.206013	0.497434	-0.0979495	0.392263	-0.123104	15
F5H5I6;Q12849;H0Y8R1;H0YAK1	GRSF1	GRSF1	Known mitochondrial	#N/A	G-rich sequence factor 1	-0.615574	-0.0122571	0.726483	0.010923	-0.0435121	-0.0391621	-0.0786247	0.315334	0.392257	-0.0139023	20
P13284	IFI30	IFI30	#N/A	#N/A	Gamma-interferon-inducible lysosomal thiol reductase	-0.132989	-0.241612	0.313826	-0.248691	0.46289	-0.00193447	0.123931	-0.384847	0.390282	-0.120043	3
Q9BZV1;K7EP32	UBXN6	UBXN6	#N/A	#N/A	UBX domain-containing protein 6	-0.377576	-0.210964	0.275603	-0.403542	0.495797	0.0106367	0.405666	-0.145382	0.389897	-0.18164	13
Q9NQW7;Q5T6H7	XPNPEP1	XPNPEP1	#N/A	#N/A	Xaa-Pro aminopeptidase 1	0.28889	0.0354831	0.418568	0.0500489	0.360196	-0.101428	0.182311	-0.146787	0.389677	-0.0237023	35
Q9UQ13;X6RI37	SHOC2	SHOC2	#N/A	#N/A	Leucine-rich repeat protein SHOC-2	0.280838	0.0803847	0.493955	0.267356	0.276437	-0.112787	0.280481	-0.147522	0.389291	0.0897693	19
X6R3N0;Q5K4L6;H7BZH4	SLC27A3	SLC27A3	Predicted mitochondrial	#N/A	Long-chain fatty acid transport protein 3	-0.119808	-0.259392	0.405992	-0.27174	0.371392	-0.296846	0.291721	-0.444891	0.388796	-0.284238	24
P15586;H7C3P4;F6S8M0;H0YFA9;F5H4C6	GNS	GNS	#N/A	#N/A	N-acetylglucosamine-6-sulfatase	0.0705267	-0.10118	0.371615	-0.0664878	0.405775	-0.0360229	0.264597	-0.0810338	0.388796	-0.0511749	15
K7EIY1;Q9Y421;K7ENN5;K7ELZ8	FAM32A	FAM32A	#N/A	#N/A	Protein FAM32A	-0.289069	0.0839282	0.683921	0.811882	0.0164963	-0.276642	0.326997	0.492315	0.388465	0.367936	7
Q14728;D6RIZ4;D6RA47;D6RE79	MFSD10	MFSD10	#N/A	#N/A	Major facilitator superfamily domain-containing protein 10	-0.00649231	-0.211465	0.137635	-0.230922	0.601697	-0.165337	0.390117	-0.48348	0.388245	-0.197757	7
Q9NP58;H7BXK9	ABCB6	ABCB6	Known mitochondrial	#N/A	ATP-binding cassette sub-family B member 6, mitochondrial	0.206268	-0.175436	0.154972	-0.0891138	0.588517	-0.00434902	0.465922	-0.259755	0.387969	-0.046109	22
Q9C040;A0A0J9YX34	TRIM2	TRIM2	#N/A	#N/A	Tripartite motif-containing protein 2	0.278817	0.189413	0.259785	-0.04883	0.504671	-0.0345149	0.53097	0.200253	0.387418	-0.0416547	28
J3QR64	EIF4A1	EIF4A1	#N/A	#N/A		-1.43059	-0.825108	-0.848869	-0.927688	1.04292	1.30077			0.387153	0.579808	15
Q9NS86	LANCL2	LANCL2	#N/A	#N/A	LanC-like protein 2	0.408494	0.276318	0.586693	0.236829	0.155102	-0.0774976	0.293959	0.230572	0.386976	0.0882095	14
P04179;F5H3C5;F5H4R2;F5GYZ5	SOD2	SOD2	Known mitochondrial	Peroxisomedb	Superoxide dismutase [Mn], mitochondrial	0.455544	-0.127526	0.307195	-0.0721187	0.462157	0.0901759	0.608147	-0.199719	0.386756	0.0113095	8
E7EV01;O15484;A0A3B3IRX8	CAPN5	CAPN5	#N/A	#N/A	Calpain-5	0.0563061	-0.126266	0.357946	-0.241543	0.414244	-0.27418	0.168257	-0.678487	0.38637	-0.25777	18
Q6PJW8	CNST	CNST	#N/A	#N/A	Consortin			0.15069	-0.12078	0.588709	0.160017	0.158208	-0.0308255	0.386259	0.0264389	4
Q9ULC3	RAB23	RAB23	#N/A	#N/A	Ras-related protein Rab-23	-0.00251245	-0.184556	0.207893	0.0581087	0.544881	0.113167	0.678793	-0.0463548	0.386204	0.0859005	7
Q8N129;A0A0J9YYJ0	CNPY4	CNPY4	#N/A	#N/A	Protein canopy homolog 4	0.149129	-0.165159	0.158466	-0.0760217	0.581399	0.0374524	0.645609	-0.233566	0.385376	-0.0181693	10
P08754	GNAI3	GNAI3	#N/A	#N/A	Guanine nucleotide-binding protein G(k) subunit alpha	0.144699	-0.179564	0.25411	-0.102667	0.505484	-0.0436161	0.599984	-0.0842726	0.385265	-0.0728393	28
O75884	RBBP9	RBBP9	#N/A	#N/A	Putative hydrolase RBBP9	0.624616	0.14274	0.631337	0.313942	0.0875986	-0.0493375	0.20989	0.0926134	0.384934	0.143707	8
Q8N128;G3V583	FAM177A1	FAM177A1	#N/A	#N/A	Protein FAM177A1	-0.291186	-0.321622	0.197488	-0.61202	0.55031	0.275603	0.454387	-0.189318	0.384658	-0.100995	6
P37235;E9PC71;P84074	HPCAL1;HPCA	HPCAL1	#N/A	#N/A	Hippocalcin-like protein 1;Neuron-specific calcium-binding protein hippocalcin	0.265077	-0.0829121	0.189793	-0.0214675	0.556209	-0.0504277	0.252173	-0.109452	0.384602	-0.0358749	18
D6RGI3;D6RER5;Q9NVA2;D6RDU5	SEPT11	SEPT11	#N/A	#N/A	Septin-11	0.330558	0.203389	0.472488	0.178109	0.29066	0	0.287236	0.0174944	0.384437	0.0918014	33
Q9UBF6	RNF7	RNF7	#N/A	#N/A	RING-box protein 2			0.30229	1.15277	0.462052	0.0244615	0.146264	0.0468402	0.384381	0.696216	3
C9J9B2;C9JIJ9;Q6XE24;A0A1B0GUW5	RBMS3	RBMS3	#N/A	#N/A	RNA-binding motif, single-stranded-interacting protein 3	0.26135	0.392427	0.524565	-0.099108	0.227987	-0.0889451	0.386149	0.0847447	0.383884	-0.0940176	8
P05556	ITGB1	ITGB1	#N/A	#N/A	Integrin beta-1	-0.396175	-0.189105	0.259423	-0.148385	0.496718	0.0316775	0.368265	-0.149697	0.382944	-0.0555463	36
Q9NRW1	RAB6B	RAB6B	#N/A	#N/A	Ras-related protein Rab-6B	-0.183556	0.138028	-0.0373103	-0.0111372	0.706199	-0.0699666	0.377846	-0.400454	0.38182	-0.0402521	19
O14734;H7C5A7;E9PJN0	ACOT8	ACOT8	Predicted mitochondrial	Peroxisomedb	Acyl-coenzyme A thioesterase 8	0.457016	-0.170134	0.129481	0.104873	0.595504	0.151209	0.369494	0.00920381	0.381228	0.128227	6
Q9P0L0	VAPA	VAPA	#N/A	#N/A	Vesicle-associated membrane protein-associated protein A	0.132774	-0.0523563	0.3744	0.0567222	0.383939	0.0391384	0.247684	-0.012912	0.379177	0.0479571	26
P10768;X6RA14;H7BZT7	ESD	ESD	#N/A	#N/A	S-formylglutathione hydrolase	0.494979	0.316378	0.468531	0.262794	0.281194	-0.0863388	0.124593	0.0291349	0.377901	0.0987632	22
Q96AB3;K7EKW4;K7ENV7	ISOC2	ISOC2	Known mitochondrial	#N/A	Isochorismatase domain-containing protein 2, mitochondrial	0.0464211	0.251568	0.569005	0.172616	0.157044	-0.144425	0.350384	-0.265345	0.377679	0.0227868	8
H0YE88;P28347;H0YEJ9;A0A1X7SBS4;Q99594;A0A0A0MRF3;Q53GI4;Q15561;Q15562;H0YGS2	TEAD1;TEAD3;TEAD4;TEAD2	TEAD1	#N/A	#N/A	Transcriptional enhancer factor TEF-1;Transcriptional enhancer factor TEF-5;Transcriptional enhancer factor TEF-3;Transcriptional enhancer factor TEF-4	0.453439	0.116365	0.335255	-0.0157242	0.418352	0.00388999	0.262433	0.320427	0.377401	-0.00588377	8
Q9BVC4;A0A0A0MR05;H3BPT1;H3BN58;H3BSZ4;H3BM50;H3BPU5;H3BR25	MLST8	MLST8	#N/A	#N/A	Target of rapamycin complex subunit LST8	0.128293	0.0779266	0.081885	-0.224334	0.621055	0.295723	0.261832	0.383055	0.376513	0.0590022	10
P08247;H7C4W3	SYP	SYP	#N/A	#N/A	Synaptophysin	0.307428	-0.0195505	0.138814	-0.388072	0.579277	-0.313065	0.668755	-0.612615	0.37579	-0.350081	4
Q8IVW6	ARID3B	ARID3B	#N/A	#N/A	AT-rich interactive domain-containing protein 3B	0.428142	0.48656	0.104202	-0.143692	0.603502	0.286763	0.827006	0.22885	0.375345	0.0875307	15
F6TLX2	GLOD4	GLOD4	Known mitochondrial	#N/A		0.33182	0.192447	0.434241	0.260387	0.313246	-0.048263	0.236462	0.024036	0.375012	0.1143	24
P06132;A0A494C085;A0A1B0GVN9;A0A1B0GVZ4;A0A494C0Q8;Q5T446;A0A494BZY8;A0A494C0S8;H0Y5R6	UROD	UROD	#N/A	#N/A	Uroporphyrinogen decarboxylase	0.487795	0.273456	0.583712	0.23952	0.130799	-0.171352	0.122739	0.0112093	0.374956	0.0486617	16
P09525;Q6P452	ANXA4	ANXA4	#N/A	#N/A	Annexin A4;Annexin	0.390998	-0.208794	0.475292	-0.080576	0.266757	-0.196227	0.0976109	-0.365202	0.374789	-0.137243	19
Q96RL7	VPS13A	VPS13A	Known mitochondrial	#N/A	Vacuolar protein sorting-associated protein 13A	0.343465	-0.0919403	0.29772	-0.147825	0.447949	-0.120341	0.279887	-0.201875	0.374789	-0.134018	59
P62714	PPP2CB	PPP2CB	#N/A	#N/A	Serine/threonine-protein phosphatase 2A catalytic subunit beta isoform	0.214995	0.135009	0.259664	-0.0542875	0.480885	0.0173518	0.415975	-0.115332	0.374511	-0.0180232	25
P52565;J3KTF8;J3QQX2;J3KRY1;J3KRE2	ARHGDIA	ARHGDIA	#N/A	#N/A	Rho GDP-dissociation inhibitor 1	0.429	0.095587	0.351289	0.067088	0.396927	-0.0564762	0.295723	-0.00306179	0.374288	0.0066284	20
P14174	MIF	MIF	#N/A	#N/A	Macrophage migration inhibitory factor	0.514905	0.489337	0.475604	0.487178	0.264717	-0.157496	0.112767	-0.0469508	0.37401	0.200555	6
Q9NYJ1	COA4	COA4	Known mitochondrial	#N/A	Cytochrome c oxidase assembly factor 4 homolog, mitochondrial	-0.394164	-0.0327429	0.757279	0.241474	-0.150785	-0.0496959	0.282973	0.167872	0.373542	0.103222	6
Q9H3Q1;J3KRZ9	CDC42EP4	CDC42EP4	#N/A	#N/A	Cdc42 effector protein 4	0.248535	-0.0786703	0.282973	-0.145143	0.457647	-0.470009	0.329526	-0.491348	0.372952	-0.298451	12
Q9BU23	LMF2	LMF2	#N/A	#N/A	Lipase maturation factor 2	-0.248553	-0.733028	0.389677	-0.616569	0.355355	-0.0082179	0.457647	0.135272	0.372618	-0.280562	10
Q8IXV7	KLHDC8B	KLHDC8B	#N/A	#N/A	Kelch domain-containing protein 8B			0.81106	0.629939	-0.261933	-0.281755	-0.117333	-0.614779	0.3721	0.244942	6
O75695	RP2	RP2	#N/A	#N/A	Protein XRP2	0.34551	0.193078	0.338453	0.063641	0.404794	0.105544	0.282973	-0.114707	0.372005	0.0847446	7
Q96QT6;C9J9G2	PHF12	PHF12	#N/A	#N/A	PHD finger protein 12			0.148739	-0.489929	0.562181	-0.364478			0.37022	-0.42584	3
Q12846;C9JFM5	STX4	STX4	#N/A	#N/A	Syntaxin-4	0.000432815	-0.272332	0.375735	-0.0423379	0.364348	-0.31651	0.194717	-0.450439	0.370053	-0.172921	10
Q7L775	EPM2AIP1	EPM2AIP1	#N/A	#N/A	EPM2A-interacting protein 1	0.357833	0.180148	0.310922	-0.0071301	0.42503	0.131589	0.631896	0.339594	0.369103	0.0638963	21
Q8WUY8;M0R1E3	NAT14	NAT14	#N/A	#N/A	N-acetyltransferase 14	0.108491	-0.0746993	0.279531	-0.196095	0.452912	-0.294916	0.366924	-0.571429	0.368824	-0.244659	8
P04080;A0A1W2PS52	CSTB	CSTB	#N/A	#N/A	Cystatin-B	0.236095	-0.0383174	0.327572	-0.0169353	0.407842	-0.0367035	0.317536	0.0182068	0.368265	-0.0267855	6
A0A2C9F2P4;A0A286YFF7;P50897;Q5T0S4;A0A286YFE3;A0A286YFL8	PPT1	PPT1	#N/A	#N/A	Palmitoyl-protein thioesterase 1	-0.054677	-0.0539728	0.598175	0.00388999	0.0943712	-0.0988918	0.17645	-0.0418626	0.368154	-0.0465858	14
Q9BTZ2	DHRS4	DHRS4	Predicted mitochondrial	#N/A	Dehydrogenase/reductase SDR family member 4	0.217727	-0.206162	0.373286	-0.526514	0.362105	-0.0297795	0.429428	-0.270051	0.367707	-0.256873	8
Q92930;H0YNE9	RAB8B	RAB8B	#N/A	#N/A	Ras-related protein Rab-8B	0.348346	0.00920381	0.401303	0.102053	0.332164	0.0710762	0.244765	-0.0660648	0.367147	0.0866479	10
P20645;F5GX30;H0YGE9	M6PR	M6PR	#N/A	#N/A	Cation-dependent mannose-6-phosphate receptor	0.207768	-0.0290286	0.416083	0.00144204	0.316378	0.0241777	0.14965	0.0284277	0.367091	0.0128547	12
O75223;M0QZK8;B8ZZK2	GGCT	GGCT	#N/A	#N/A	Gamma-glutamylcyclotransferase	0.480369	0.105544	0.406319	0.0946415	0.326652	-0.0678027	0.230203	0.186754	0.367035	0.0157045	15
P13637;A0A2R8YEY8;A0A0A0MT26;M0R116	ATP1A3	ATP1A3	#N/A	#N/A	Sodium/potassium-transporting ATPase subunit alpha-3	-0.0166434	-0.188397	0.25532	-0.0530297	0.470511	-0.0676818	0.330903	-0.349971	0.366924	-0.0603371	65
Q86UT6	NLRX1	NLRX1	Known mitochondrial	#N/A	NLR family member X1	-0.667997	-0.539121	0.296311	0.172616	0.433814	0.0321009	0.810237	-0.302546	0.3667	0.104068	7
Q15149	PLEC	PLEC	#N/A	#N/A	Plectin	0.22404	-0.15457	0.301822	-0.148241	0.428786	-0.176723	0.444985	-0.266975	0.3667	-0.162412	291
Q9HB40	SCPEP1	SCPEP1	#N/A	#N/A	Retinoid-inducible serine carboxypeptidase	0.297602	0.0402613	0.511063	0.040121	0.206018	-0.117161	0.252416	-0.0603522	0.366588	-0.0363779	12
Q92466;A0A087X0X5	DDB2	DDB2	#N/A	#N/A	DNA damage-binding protein 2	0.00460933	-0.332081	0.291368	-0.282544	0.437334	-0.373327	0.246104	-0.509943	0.366196	-0.327222	22
P00441;H7BYH4	SOD1	SOD1	Predicted mitochondrial	Peroxisomedb	Superoxide dismutase [Cu-Zn]	0.307312	0.0839282	0.446997	0.108892	0.277271	-0.0224636	0.302407	0.00949053	0.364628	0.0447089	12
A0A087X1Z3;Q9UL46;H0YM70	PSME2	PSME2	#N/A	#N/A	Proteasome activator complex subunit 2	0.317304	0.0869197	0.438612	0.0433446	0.284988	-0.0990462	0.230818	-0.014281	0.363844	-0.0260948	21
P53004	BLVRA	BLVRA	#N/A	#N/A	Biliverdin reductase A	0.418784	0.131721	0.399882	0.073546	0.326077	-0.154265	0.201508	-0.180626	0.363451	-0.0358676	32
Q9GZT8	NIF3L1	NIF3L1	Known mitochondrial	#N/A	NIF3-like protein 1	0.309875	0.161952	0.462471	0.305329	0.25689	0.00417777	0.102725	0.157303	0.363339	0.162597	16
P11413;E9PD92	G6PD	G6PD	#N/A	#N/A	Glucose-6-phosphate 1-dehydrogenase	0.509037	0.0270125	0.477781	0.032242	0.238665	-0.0104977	0.246226	0.0100636	0.363171	0.0110304	43
Q3ZCM7;A0A075B736;Q5SQY0	TUBB8	TUBB8	#N/A	#N/A	Tubulin beta-8 chain	0.405775	0.535555	0.31823	0.369606	0.406101	0.360083	0.0588013	0.20063	0.362834	0.364853	12
O95490;B1ALU3;B1ALU1;H0Y5C0	LPHN2;ADGRL2	LPHN2	#N/A	#N/A	Latrophilin-2	0.325617	-0.195021	0.451541	0.0184917	0.266996	-0.0960516	0.290188	-0.0861551	0.362217	-0.0376435	25
Q6ZR64;K7EQX8	MXRA7	MXRA7	#N/A	#N/A		0.075738	-0.137902	0.179384	-0.189763	0.523863	1.44917	0.279887	0.803723	0.361881	0.850899	3
P13861	PRKAR2A	PRKAR2A	#N/A	#N/A	cAMP-dependent protein kinase type II-alpha regulatory subunit	0.168385	0.0357646	0.349478	0.0342158	0.373843	-0.112038	0.267116	-0.128803	0.361712	-0.0370586	25
Q6PCE3	PGM2L1	PGM2L1	#N/A	#N/A	Glucose 1,6-bisphosphate synthase	0.0344974	-0.0803929	0.412185	0.168899	0.309293	-0.0835233	0.295841	-0.297892	0.361656	0.0482013	17
P0CG35;P0CG34	TMSB15B;TMSB15A	TMSB15B	#N/A	#N/A	Thymosin beta-15B;Thymosin beta-15A	-0.276433	0.144699	0.670478	0.663026	-0.0320937	0.230326	-0.313925	0.299948	0.361544	0.462838	9
P46940;A0A0J9YXZ5;H0YLE8	IQGAP1	IQGAP1	#N/A	#N/A	Ras GTPase-activating-like protein IQGAP1	0.275365	0.0173518	0.380064	0.00317045	0.340847	-0.0675154	0.352646	-0.00914677	0.360589	-0.0317396	110
Q8N2G8;K7ESN3	GHDC	GHDC	#N/A	#N/A	GH3 domain-containing protein	0.0742315	-0.0353426	0.111966	-0.168561	0.572114	0.122607	-0.0966069	-0.153992	0.360308	-0.015644	12
O60927;Q5SRK2	PPP1R11	PPP1R11	#N/A	#N/A	Protein phosphatase 1 regulatory subunit 11	0.39846	0.0522768	0.353436	0.00173014	0.365916	0.16954	0.299362	0.175429	0.35969	0.0880737	6
Q15843;S4R3E9	NEDD8;NEDD8-MDP1	NEDD8	#N/A	#N/A	NEDD8	0.252052	0.121015	0.365581	0.0880058	0.353323	-0.0550966	0.195222	0.00963388	0.359465	0.0182282	6
Q9Y3E7	CHMP3	CHMP3	#N/A	#N/A	Charged multivesicular body protein 3	0.251689	-0.229179	0.0943712	-0.261137	0.582941	-0.0477112	0.532267	0.107822	0.35924	-0.150481	6
P41236;E7EMN6;E7EUI7;Q6NXS1	PPP1R2;PPP1R2P3	PPP1R2	#N/A	#N/A	Protein phosphatase inhibitor 2;Protein phosphatase inhibitor 2-like protein 3	0.37951	0.0978804	0.437441	0.00733906	0.275007	0.0102069	0.0687396	-0.105334	0.358509	0.00877371	9
Q92626	PXDN	PXDN	#N/A	#N/A	Peroxidasin homolog	-0.468771	0.303576	0.0350608	0.0851526	0.622274	-0.0854508	0.621524	-0.0384063	0.35834	0.00237124	29
P11117;E9PQY3;E9PHY0;B7Z7D2;E9PP23	ACP2	ACP2	#N/A	#N/A	Lysosomal acid phosphatase	0.188654	0.0057592	0.288418	0.0368901	0.424492	0.0405417	0.207768	-0.130918	0.358059	0.0387171	13
P49773	HINT1	HINT1	#N/A	#N/A	Histidine triad nucleotide-binding protein 1	0.581303	0.447844	0.496923	0.440633	0.204391	-0.0481586	0.135404	0.183836	0.358059	0.21684	16
Q9Y6W5	WASF2	WASF2	#N/A	#N/A	Wiskott-Aldrich syndrome protein family member 2	0.0583859	0.116631	0.390888	0.0364681	0.323082	0.0511633	0.332278	0.0297002	0.357383	0.0438344	12
Q9C0C4	SEMA4C	SEMA4C	#N/A	#N/A	Semaphorin-4C	0.0920721	-0.103829	0.471448	-0.148705	0.233275	-0.169112	0.638676	-0.14256	0.35727	-0.158872	7
F5GWI9;F5GXZ7;F5GZ97;Q9Y3C0;H0YGN0	CCDC53	CCDC53	#N/A	#N/A	WASH complex subunit CCDC53	0.170951	0.0574155	0.455229	0.0597706	0.251931	-0.68506	0.0743684	-0.0718003	0.357158	-0.265102	4
Q99719;G3XAH0;B4DJ62;C9JM82;E7EX32;E7EQM7;E7EPG2;F8W9E5	SEPT5	SEPT5	#N/A	#N/A	Septin-5	0.0418037	0.000288558	0.181929	0.0801119	0.512783	0.00475299	0.430927	-0.239038	0.35682	0.0429245	26
Q9BVA1	TUBB2B	TUBB2B	#N/A	#N/A	Tubulin beta-2B chain	0.167615	0.1145	0.167358	0.0779266	0.523462	0.114767	0.223793	-0.0232551	0.356369	0.0964643	35
P23610	F8A1	F8A1	#N/A	#N/A	Factor VIII intron 22 protein	0.298776	-0.120953	0.0852886	-0.0412241	0.584289	0.418028	0.433494	0.106214	0.356256	0.206599	8
P55001	MFAP2	MFAP2	#N/A	#N/A	Microfibrillar-associated protein 2	-0.522468	-0.0668806	0.0962619	-0.315361	0.575409	-0.38163	0.381173	-0.41423	0.355637	-0.348115	7
Q9NSU2;C9J052	TREX1	TREX1	#N/A	#N/A	Three-prime repair exonuclease 1	0.435522	-0.342104	0.497331	0.0543624	0.197488	-0.472509	0.218223	-0.31874	0.355185	-0.185154	4
Q59EK9	RUNDC3A	RUNDC3A	#N/A	#N/A	RUN domain-containing protein 3A	0.0316775	-0.193387	0.286881	-0.189977	0.420186	-0.0564762	0.359634	-0.272698	0.355073	-0.121683	8
H0YB09;A0A0C4DGD4;H0YB62	C14orf159	C14orf159	Known mitochondrial	#N/A		0.0214797	-0.110199	0.182692	0.131458	0.50853	-0.180038	0.567545	-0.140412	0.354791	-0.0158992	10
Q13232	NME3	NME3	Known mitochondrial	#N/A	Nucleoside diphosphate kinase 3	-0.0157534	-0.188003	0.235114	-0.23817	0.463832	-0.106747	0.569588	-0.411311	0.354001	-0.170962	14
Q9HA64;I3L139;I3L3W5	FN3KRP	FN3KRP	#N/A	#N/A	Ketosamine-3-kinase	0.458592	0.178492	0.518334	0.219091	0.167229	-0.120075	0.249506	0.109695	0.353436	0.0594522	14
Q14011;K7EMY9;K7EPM4;K7EQR7;D6W5Y5;K7EJV1;K7EJV5;K7ER40;K7ENX8;K7ELT6;K7ELV6	CIRBP	CIRBP	#N/A	#N/A	Cold-inducible RNA-binding protein	0.222063	0.240864	0.51652	0.337768	0.169155	-0.024766	0.38228	0.384271	0.353267	0.167859	14
P19022	CDH2	CDH2	#N/A	#N/A	Cadherin-2	-0.498709	-0.328924	0.611267	-0.0821482	0.0371714	-0.200929	0.0958569	-0.260377	0.352589	-0.140317	25
A6NDG6	PGP	PGP	#N/A	#N/A	Phosphoglycolate phosphatase	0.487383	0.174918	0.437654	0.269512	0.262072	0.0357646	0.10916	0.00906043	0.352533	0.157367	14
Q93050;B7Z641;B7Z2A9	ATP6V0A1	ATP6V0A1	#N/A	#N/A	V-type proton ATPase 116 kDa subunit a isoform 1;V-type proton ATPase subunit a	0.135666	-0.0319461	0.170053	-0.138807	0.513794	-0.0978415	0.418676	-0.225649	0.352137	-0.118179	32
A0A0J9YXF2;A0A0J9YYG4;Q15165;J3QT77;G3XAK4	PON2	PON2	#N/A	#N/A	Serum paraoxonase/arylesterase 2	0.0538064	-0.149697	0.434668	-0.0800727	0.263515	0.0413831	0.0880058	-0.0798592	0.351628	-0.018067	12
P60953;Q5JYX0	CDC42	CDC42	#N/A	#N/A	Cell division control protein 42 homolog	0.329526	-0.0337615	0.305212	-0.0423231	0.394514	-0.0660195	0.284396	-0.129024	0.350554	-0.0541227	14
P13807	GYS1	GYS1	#N/A	#N/A	Glycogen [starch] synthase, muscle	0.0416635	-0.316762	0.458277	0.170181	0.23352	-0.0304276	-0.108534	-0.349217	0.350271	0.073361	13
Q13404;I3L0A0;G3V2F7;A0A0A0MSL3	UBE2V1;TMEM189-UBE2V1	UBE2V1	#N/A	#N/A	Ubiquitin-conjugating enzyme E2 variant 1	0.384713	0.167229	0.524565	0.244765	0.148869	-0.0872888	0.144438	0.0539454	0.348912	0.0882706	12
Q9Y2J0;F8VP47	RPH3A	RPH3A	#N/A	#N/A	Rabphilin-3A	0.188907	-0.279897	0.410558	-0.326606	0.282736	-0.112397	0.351176	-0.059029	0.348062	-0.215529	20
Q9BRK5;H0Y3T6;G3V1E2	SDF4	SDF4	#N/A	#N/A	45 kDa calcium-binding protein	-1.42453	0.00417777	0.466549	0.129217	0.216362	0.254957	0.305679	0.301119	0.346872	0.193456	16
P00492	HPRT1	HPRT1	#N/A	#N/A	Hypoxanthine-guanine phosphoribosyltransferase	0.422018	0.208143	0.524866	0.246469	0.143263	-0.0158263	0.0326651	0.103397	0.346645	0.121274	18
Q96AG3;E7EVY2	SLC25A46	SLC25A46	Known mitochondrial	#N/A	Solute carrier family 25 member 46	-0.531677	0.0650208	0.153157	1.28664	0.516721	-0.0151555	0.387583	0.0801119	0.346361	0.777851	8
Q9NZR1	TMOD2	TMOD2	#N/A	#N/A	Tropomodulin-2	0.0467006	0.0494913	0.0900404	-0.147058	0.563353	0.0132121	0.465609	-0.127179	0.346021	-0.0646987	20
Q96C86;A0A3B3ITF0	DCPS	DCPS	#N/A	#N/A	m7GpppX diphosphatase	0.296193	0.225398	0.408603	0.0342158	0.280006	-0.0132177	0.19497	0.0990932	0.345737	0.010694	14
Q01518	CAP1	CAP1	#N/A	#N/A	Adenylyl cyclase-associated protein 1	0.325617	0.0708015	0.400647	0.0888201	0.287709	-0.0353426	0.206393	-0.0420557	0.345283	0.028074	52
Q9UBV8	PEF1	PEF1	#N/A	#N/A	Peflin	0.524365	0.23952	0.435415	0.287472	0.248656	-0.0876721	0.166587	-0.167993	0.345056	0.11206	8
P52735	VAV2	VAV2	#N/A	#N/A	Guanine nucleotide exchange factor VAV2	0.535754	0.106348	0.261832	-0.0828968	0.423309	-0.069891	0.412185	-0.145605	0.344828	-0.0763792	30
A0A087WSW9;A0A087WSY9;Q16881;F8W809;A0A182DWI3;E9PIR7;E2QRB9	TXNRD1	TXNRD1	#N/A	#N/A	Thioredoxin reductase 1, cytoplasmic	0.304978	0.184852	0.505484	0.274769	0.16221	0.0462816	-0.0149223	0.209266	0.344033	0.165044	28
Q14344	GNA13	GNA13	#N/A	#N/A	Guanine nucleotide-binding protein subunit alpha-13	0.00129789	-0.14701	0.260387	-0.002657	0.422771	-0.0994635	0.345169	-0.12367	0.343863	-0.0502484	26
Q9NTJ5;E9PGZ4	SACM1L	SACM1L	Predicted mitochondrial	#N/A	Phosphatidylinositide phosphatase SAC1	0.171463	-0.041625	0.264957	-0.07224	0.418244	0.0124972	0.279174	-0.0446128	0.343635	-0.0292494	33
Q9Y639;Q9UFM8;H3BU51	NPTN;DKFZp566H1924	NPTN	#N/A	#N/A	Neuroplastin	-0.125258	0.0427844	0.139601	0.00949053	0.521754	-0.0292788	0.332966	-0.383793	0.343294	-0.00976392	6
A0A1B0GU86;Q03154	ACY1	ACY1	#N/A	#N/A	Aminoacylase-1	0.384271	-0.065793	0.440633	0.135535	0.238298	-0.0737121	-0.165596	-0.191096	0.34301	0.0347017	15
P13473;H0YCG2	LAMP2	LAMP2	#N/A	#N/A	Lysosome-associated membrane glycoprotein 2	0.0848807	-0.153158	0.34551	-0.164496	0.340163	-0.0978107	0.153805	-0.224216	0.342839	-0.130768	3
Q6ZMI0	PPP1R21	PPP1R21	#N/A	#N/A	Protein phosphatase 1 regulatory subunit 21	0.125122	-0.0587133	0.115699	-0.15967	0.538836	-0.249325	0.592732	-0.235161	0.342725	-0.203801	10
Q709C8	VPS13C	VPS13C	#N/A	#N/A	Vacuolar protein sorting-associated protein 13C	0.210514	0.153027	0.295135	0.0628125	0.387583	-0.0585331	0.311503	-0.0112971	0.3421	0.00341514	107
P35914	HMGCL	HMGCL	Known mitochondrial	Peroxisomedb	Hydroxymethylglutaryl-CoA lyase, mitochondrial	0.121546	-0.22967	0.127105	-0.413134	0.528571	-0.180348	0.62686	-0.229991	0.341758	-0.292051	14
Q96G03	PGM2	PGM2	#N/A	#N/A	Phosphoglucomutase-2	0.365357	0.0549179	0.499884	0.159242	0.163628	0.0361869	0.141564	0.00302647	0.34153	0.0990259	25
Q9Y696	CLIC4	CLIC4	Known mitochondrial	#N/A	Chloride intracellular channel protein 4	0.367147	0.0416635	0.145873	-0.104821	0.513491	-0.0522815	0.499578	-0.0883621	0.34136	-0.0783123	22
P40425	PBX2	PBX2	#N/A	#N/A	Pre-B-cell leukemia transcription factor 2	0.423417	0.067088	0.407298	0.501414	0.272143	-0.0712241	0.367707	0.354452	0.341303	0.243322	9
Q53FT3;A0A087WYW7	C11orf73	C11orf73	#N/A	#N/A	Protein Hikeshi	0.593975	0.167615	0.513996	0.245982	0.14496	-0.0947723	0.36793	0.051024	0.341246	0.0856422	5
Q07960;H0YE29;E9PNR6	ARHGAP1	ARHGAP1	#N/A	#N/A	Rho GTPase-activating protein 1	0.532965	0.127237	0.295723	-0.10583	0.385265	0.0713507	0.345851	0.012068	0.341189	-0.0145214	27
Q8NBM8;E7EVZ5	PCYOX1L	PCYOX1L	#N/A	#N/A	Prenylcysteine oxidase-like	-0.0814306	-0.16238	0.0713507	-0.300022	0.568129	-0.0573166	0.367147	-0.241663	0.341018	-0.173572	12
P07099	EPHX1	EPHX1	#N/A	#N/A	Epoxide hydrolase 1	0.0766959	-0.345051	0.214871	-0.0153158	0.456701	-0.247936	0.396379	-0.349787	0.340847	-0.126943	16
P22612	PRKACG	PRKACG	#N/A	#N/A	cAMP-dependent protein kinase catalytic subunit gamma	0.15782	-0.174687	0.288536	-0.0441219	0.390558	-0.0241937	0.141825	-0.153687	0.340448	-0.0341234	5
Q8NG68	TTL	TTL	#N/A	#N/A	Tubulin--tyrosine ligase	0.812868	0.336283	0.0182068	-0.0783961	0.602837	-0.0142373	0.631244	-0.0565062	0.339935	-0.0459601	6
Q6ICJ4;P0CG30;P0CG29;A0A087WY67	Em:AP000351.3;GSTT2B;GSTT2	Em:AP000351.3	#N/A	#N/A	Glutathione S-transferase theta-2B;Glutathione S-transferase theta-2	0.322736	0.0201999	0.540027	0.267596	0.106348	-0.150401	0.211012	-0.0598558	0.339423	0.0736831	15
Q13433	SLC39A6	SLC39A6	#N/A	#N/A	Zinc transporter ZIP6	-0.638636	-0.275454	0.556307	0.212258	0.0839282	-0.171645	-0.113083	-0.262763	0.339365	0.0330388	11
Q9NWM8	FKBP14	FKBP14	#N/A	#N/A	Peptidyl-prolyl cis-trans isomerase FKBP14	-0.192612	0.0521377	0.0271541	0.342441	0.594835	0.40719	-0.353524	0.102725	0.338738	0.375178	8
A0A0C4DGH3;Q9Y6R0;M0QYC2;M0QXQ4	NUMBL	NUMBL	#N/A	#N/A	Numb-like protein	0.0561673	-0.208144	0.521051	-0.051459	0.128953	-0.704489	0.304978	-0.547847	0.338282	-0.341336	10
Q9Y6W3	CAPN7	CAPN7	#N/A	#N/A	Calpain-7	0.817705	0.189287	0.560715	0.266397	0.0749164	-0.3709	0.801076	0.298424	0.338168	-0.017344	10
O43504	LAMTOR5	LAMTOR5	#N/A	#N/A	Ragulator complex protein LAMTOR5	-0.103565	-0.184621	0.312433	-0.0949573	0.361207	0.00906043	0.254473	-0.189828	0.337026	-0.0420112	5
P04062;A0A0G2JNZ5;A0A0G2JLB3;A0A0G2JNZ0	GBA	GBA	#N/A	#N/A	Glucosylceramidase	0.212507	-0.0644648	0.428893	-0.0337319	0.23842	-0.106591	0.162597	-0.130287	0.336798	-0.0697017	24
Q9BXI3	NT5C1A	NT5C1A	#N/A	#N/A	Cytosolic 5-nucleotidase 1A	0.34301	0.0411028	0.264837	-0.224621	0.405121	0.0368901	0.228973	-0.195368	0.336683	-0.087948	25
P27144	AK4	AK4	Known mitochondrial	#N/A	Adenylate kinase 4, mitochondrial	-0.323787	-0.12904	0.454492	-0.13841	0.207518	-0.306306	0.454597	-0.312026	0.336283	-0.219917	15
P16591	FER	FER	#N/A	#N/A	Tyrosine-protein kinase Fer	0.575506	0.425889	0.195096	-0.237932	0.464668	-0.175582	0.0292761	0.00201835	0.336169	-0.20642	9
Q9BYM8;G3XAG9	RBCK1	RBCK1	#N/A	#N/A	RanBP-type and C3HC4-type zinc finger-containing protein 1			0.315218	0.293253	0.356482	-0.132135			0.335998	0.0961809	4
E7EVA0;P27816	MAP4	MAP4	#N/A	#N/A	Microtubule-associated protein;Microtubule-associated protein 4	0.0912597	-0.13949	0.371726	-0.103426	0.298776	-0.200167	0.279174	-0.373159	0.335712	-0.150986	81
P28289	TMOD1	TMOD1	#N/A	#N/A	Tropomodulin-1	-0.218296	-0.126045	0.11063	-0.221943	0.53037	-0.0868444	0.580145	-0.331808	0.335712	-0.152813	28
A0A0A6YYL4	CORO7-PAM16	CORO7-PAM16	#N/A	#N/A	Coronin	0.462995	0.0812032	0.338453	-0.0851753	0.332507	-0.0957124	0.350045	-0.15157	0.335483	-0.0904342	47
Q00796;H0YLA4	SORD	SORD	#N/A	#N/A	Sorbitol dehydrogenase	0.293017	0.247563	0.437015	0.238787	0.225768	-0.0131158	0.174406	0.091666	0.335255	0.118326	25
P45983	MAPK8	MAPK8	#N/A	#N/A	Mitogen-activated protein kinase 8	0.52296	0.476537	0.0632269	-0.0839515	0.562181	0.335712	0.27035	0.185613	0.334168	0.141086	7
O95674	CDS2	CDS2	#N/A	#N/A	Phosphatidate cytidylyltransferase 2	0.277628	0.0154976	0.185105	-0.0290433	0.468635	-0.0226248	0.349139	-0.274913	0.333824	-0.0258305	5
Q8N9F7;J3QQN7	GDPD1	GDPD1	Predicted mitochondrial	#N/A	Glycerophosphodiester phosphodiesterase domain-containing protein 1	-0.25367	-0.0608336	0.280838	0.0812032	0.383718	0.103665	0.474877	0.0274371	0.333195	0.092478	12
Q9P2K3;H0YF22	RCOR3	RCOR3	#N/A	#N/A	REST corepressor 3	0.348006	0.0207689	0.291368	-0.00216568	0.37362	0.128953	0.365581	0.293606	0.33308	0.0648829	15
Q8WVY7	UBLCP1	UBLCP1	#N/A	#N/A	Ubiquitin-like domain-containing CTD phosphatase 1	0.406537	0.326997	0.573181	0.239398	0.044464	-0.0469211	0.241596	0.100843	0.332908	0.10333	21
Q9Y296;E9PKS9;E9PQE8;J3KP27;E9PN70;G3V1A0;G5EA23	TRAPPC4	TRAPPC4	#N/A	#N/A	Trafficking protein particle complex subunit 4	0.148348	0.108892	0.430178	-0.124141	0.228111	-0.130492	0.508124	-0.306377	0.332679	-0.127313	8
O75688;C9JIR6;A0A3B3IS24;B8ZZF0	PPM1B	PPM1B	#N/A	#N/A	Protein phosphatase 1B	0.227864	0.212507	0.40621	0.172359	0.254836	-0.0667748	-0.111477	-0.0772085	0.332507	0.0577414	22
P21964;E7EMS6;E7EUU8	COMT	COMT	Predicted mitochondrial	#N/A	Catechol O-methyltransferase	0.217851	-0.0911564	0.262313	-0.0575568	0.398898	-0.0586984	0.269273	-0.130776	0.332221	-0.0581275	17
J3QRG5;J3KSJ5;Q9BQA9;J3KTF4;J3QKS6;J3QLB7	C17orf62	C17orf62	Predicted mitochondrial	#N/A	Uncharacterized protein C17orf62	0.374066	-0.0480094	0.223299	0.0970713	0.432853	-0.0622789	0.186754	-0.143182	0.331877	0.0195952	5
F5GYQ1;P61421;R4GN72;J3QL14	ATP6V0D1	ATP6V0D1	#N/A	#N/A	V-type proton ATPase subunit d 1	0.196355	-0.0995253	0.105946	-0.125903	0.526369	-0.134271	0.42825	-0.181002	0.331419	-0.130081	20
Q13015	MLLT11	MLLT11	#N/A	#N/A	Protein AF1q	0.0551957	0.161565	0.332622	-0.288717	0.329181	-0.230736	0.204266	0.00748262	0.330903	-0.259435	6
Q9UK53;A0A0C4DFW2	ING1	ING1	#N/A	#N/A	Inhibitor of growth protein 1;Inhibitor of growth protein	0.0531114	-0.150449	-0.097363	0.0321009	0.660107	0.16954	0.276437	0.117695	0.330524	0.102457	5
A0A3B3ITT1;Q6IQ22	RAB12	RAB12	#N/A	#N/A	Ras-related protein Rab-12	0.954941	0.392537	0.446256	0.338681	0.204642	0.0220482	0.15004	-0.111898	0.330501	0.189034	8
J3KQJ1;Q8NBJ7;C9JL30;A8MXB9;A0A494C1B1;C9J660;H7C3B2;F8WA42;E9PBT8;J3QT17	SUMF2	SUMF2	#N/A	#N/A	Sulfatase-modifying factor 2	0.0817487	0.0199154	0.395502	-0.121926	0.260748	-0.0467869	0.177344	-0.0687859	0.329698	-0.0838674	12
P35573	AGL	AGL	#N/A	#N/A	Glycogen debranching enzyme;4-alpha-glucanotransferase;Amylo-alpha-1,6-glucosidase	0.25532	0.116232	0.305679	0.0758749	0.352194	-0.0336582	0.307195	-0.092494	0.329124	0.0221476	63
Q5JTV8;A0A0A0MSK5	TOR1AIP1	TOR1AIP1	#N/A	#N/A	Torsin-1A-interacting protein 1	0.287118	-0.0761435	0.390117	-0.0904189	0.265077	-0.0576169	0.404576	-0.00290272	0.328951	-0.0739247	31
Q6ZT62			#N/A	#N/A		0.280481	0.224411	0.448901	0.0538064	0.197488	0.00705191	0.0835197	-0.0427837	0.328664	0.0306186	17
Q9ULF5	SLC39A10	SLC39A10	#N/A	#N/A	Zinc transporter ZIP10	-0.299614	-0.0228593	0.358621	-0.0204868	0.297485	-0.0402447	0.0912597	-0.212685	0.328377	-0.0303319	10
Q53GQ0;A0A1B0GV93;A0A1B0GVY6	HSD17B12	HSD17B12	#N/A	#N/A	Very-long-chain 3-oxoacyl-CoA reductase	0.12075	-0.00646329	0.246347	-0.0105267	0.405448	-0.0146744	0.283922	-0.176153	0.32809	-0.0125991	16
Q8WUF5	PPP1R13L	PPP1R13L	#N/A	#N/A	RelA-associated inhibitor	0.123931	1.11303	-0.00379928	-0.10293	0.597603	-0.146196	0.728661	-0.296261	0.328015	-0.124401	13
Q5T0R9	CAP1	CAP1	#N/A	#N/A	Adenylyl cyclase-associated protein			0.419539	0.132379	0.229957	0.169155	0.253868	1.16806	0.32786	0.150885	23
H3BRN4;P80404;H3BNQ7	ABAT	ABAT	Known mitochondrial	#N/A	4-aminobutyrate aminotransferase, mitochondrial	0.0220482	0.0140695	0.448372	0.137897	0.195726	-0.0944181	0.557484	-0.0911717	0.327572	0.0264105	33
Q8IUR0	TRAPPC5	TRAPPC5	#N/A	#N/A	Trafficking protein particle complex subunit 5	0.162081	0.1125	0.271904	0.0619835	0.380397	0.0350608	0.364685	-0.0506518	0.32717	0.048585	5
P05026	ATP1B1	ATP1B1	#N/A	#N/A	Sodium/potassium-transporting ATPase subunit beta-1	-0.0379026	-0.165305	0.312317	-0.0827439	0.341644	-0.165726	0.346645	-0.348023	0.327055	-0.123638	20
P00387;B1AHF3	CYB5R3	CYB5R3	Known mitochondrial	#N/A	NADH-cytochrome b5 reductase 3;NADH-cytochrome b5 reductase 3 membrane-bound form;NADH-cytochrome b5 reductase 3 soluble form	0.0367495	-0.0583528	0.226262	0.028852	0.421264	-0.101428	0.40969	-0.206079	0.327055	-0.0348178	22
Q9UET6	FTSJ1	FTSJ1	#N/A	#N/A	Putative tRNA (cytidine(32)/guanosine(34)-2-O)-methyltransferase	0.982437	-0.145206	0.47467	0.114634	0.161952	0.284869	-0.0830954	-0.166049	0.326767	0.202261	4
Q8N1F8	STK11IP	STK11IP	#N/A	#N/A	Serine/threonine-protein kinase 11-interacting protein	0.262794	-0.122868	0.338795	0.167358	0.313246	-0.194328	0.15562	-0.191854	0.326077	-0.0021801	11
Q15075	EEA1	EEA1	#N/A	#N/A	Early endosome antigen 1	0.260267	0.0472592	0.389457	0.0687396	0.259423	-0.016191	-0.0828203	-0.303187	0.325904	0.0268992	39
Q92562	FIG4	FIG4	#N/A	#N/A	Polyphosphoinositide phosphatase			0.111966	-0.109343	0.510962	-0.23703	-0.200034	-0.392838	0.325214	-0.171775	5
Q9P2B2	PTGFRN	PTGFRN	#N/A	#N/A	Prostaglandin F2 receptor negative regulator	-0.271897	-0.179057	0.306962	-0.203303	0.342441	-0.126439	0.0579701	-0.43154	0.324811	-0.164359	22
O95394;A0A494C0G1;H0Y987;A0A494C1E2;A0A087WT27;A0A494C1Q4;J3KN95;A0A494C099;A0A494C163	PGM3	PGM3	#N/A	#N/A	Phosphoacetylglucosamine mutase	0.278104	0.063641	0.363676	0.0900404	0.284396	-0.077589	0.104068	-0.030133	0.32458	0.00865896	27
Q5HYB6	DKFZp686J1372	DKFZp686J1372	#N/A	#N/A		0.182311	0.0429245	0.346304	0.0610158	0.302524	-0.0140625	0.237441	0.0169242	0.32458	0.023965	43
P32321;D6RBJ9;D6R9S0;D6RBN2	DCTD	DCTD	#N/A	#N/A	Deoxycytidylate deaminase	0.599413	0.200881	0.37362	0.0927488	0.272859	-0.0206185	0.0423643	-0.17989	0.324119	0.0371784	9
P37837;F2Z393	TALDO1	TALDO1	#N/A	#N/A	Transaldolase	0.246955	0.109294	0.380729	0.101381	0.263275	-0.0391029	0.202136	-0.0308992	0.323197	0.0328485	35
A0A087WYS1;E7EUC7;Q16851	UGP2	UGP2	#N/A	#N/A	UTP--glucose-1-phosphate uridylyltransferase	0.178492	0.057277	0.316493	0.158596	0.329755	-0.029647	0.0954519	-0.0866912	0.32314	0.0675423	24
A6NHK2	SNRPE	SNRPE	#N/A	#N/A		0.248778	0.435629	-0.194245	-0.1633	0.702037	0.267596			0.322407	0.0681755	3
B4DG22;B1AXG1;B7ZB17;P51812	RPS6KA3	RPS6KA3	#N/A	#N/A	Ribosomal protein S6 kinase alpha-3	0.351515	0.358621	0.396817	0.0464211	0.243303	0.113034	-0.0377101	-0.159605	0.322101	0.0801119	19
Q96F85;B8ZZB8	CNRIP1	CNRIP1	#N/A	#N/A	CB1 cannabinoid receptor-interacting protein 1	0.385928	0.341986	0.350497	0.317999	0.293017	-0.0459675	0.14978	0.0398403	0.322044	0.147463	10
Q9UI09;F8VRD8	NDUFA12	NDUFA12	Known mitochondrial	#N/A	NADH dehydrogenase [ubiquinone] 1 alpha subcomplex subunit 12	-0.518019	-0.0477708	0.477884	-0.115894	0.146916	-0.457158	0.0419438	-0.194278	0.32187	-0.276459	12
O00429	DNM1L	DNM1L	Known mitochondrial	Peroxisomedb	Dynamin-1-like protein	0.255561	0.0784732	0.301236	0.0668125	0.341075	-0.0604725	0.215119	-0.045625	0.321293	0.00457329	57
Q9Y3L5;A0A087X2C3;F6U784	RAP2C;RAP2A	RAP2C	#N/A	#N/A	Ras-related protein Rap-2c	-0.108783	-0.0519524	0.286763	0.0652966	0.353775	-0.0904803	0.132379	-0.221018	0.320658	-0.0104903	8
Q96BJ3	AIDA	AIDA	#N/A	#N/A	Axin interactor, dorsalization-associated protein	0.268794	-0.0732718	0.180784	-0.0814153	0.448161	-0.0122717	0.40174	-0.126376	0.320658	-0.0464293	16
Q96DA2	RAB39B	RAB39B	#N/A	#N/A	Ras-related protein Rab-39B	0.23008	-0.344263	0.183328	-0.331028	0.444667	-0.131677	0.441484	0.666666	0.319907	-0.227912	11
Q9P0U4	CXXC1	CXXC1	#N/A	#N/A	CXXC-type zinc finger protein 1	0.309293	0.110764	0.289834	-0.188019	0.347439	-0.221977	0.34301	0.187768	0.318924	-0.204898	11
Q8IY47;A0A087WXP9	KBTBD2	KBTBD2	#N/A	#N/A	Kelch repeat and BTB domain-containing protein 2	0.317188	0.0142124	0.538538	0.14274	0.0575542	0.281075	0.260869	-0.182933	0.317999	0.213565	12
A0A087WT99;Q9H0W9;E9PJU8;E9PQS1;E9PPB5	C11orf54	C11orf54	#N/A	#N/A	Ester hydrolase C11orf54	0.335483	0.262433	0.354678	0.057277	0.27965	-0.0333776	0.153676	0.0492126	0.317651	0.0126617	13
X6R5Z6;Q5JTJ3	COA6	COA6	Known mitochondrial	#N/A	Cytochrome c oxidase assembly factor 6 homolog	-0.335845	-0.117177	0.656268	0.161823	-0.125746	-0.120106	0.070252	-0.0358454	0.317611	0.0277344	7
O75976	CPD	CPD	#N/A	#N/A	Carboxypeptidase D	0.138683	-0.0759153	0.311503	-0.164157	0.323658	-0.105861	0.348459	-0.209178	0.317594	-0.134715	43
Q9H832	UBE2Z	UBE2Z	#N/A	#N/A	Ubiquitin-conjugating enzyme E2 Z	0.250962	0.016211	0.316146	0.148999	0.318693	-0.0288667	0.215492	0.0436244	0.31742	0.0628056	16
P17600	SYN1	SYN1	#N/A	#N/A	Synapsin-1	0.283685	-0.0647666	0.100709	-0.037562	0.505586	0.00776951	0.291132	-0.0946491	0.317304	-0.0147182	15
P63000	RAC1	RAC1	#N/A	#N/A	Ras-related C3 botulinum toxin substrate 1	0.261711	0.0655723	0.351967	0.121015	0.28155	-0.0612851	0.185993	-0.0341012	0.317188	0.0327427	12
Q9UBG0	MRC2	MRC2	#N/A	#N/A	C-type mannose receptor 2	-0.196508	-0.357419	0.317999	-0.364775	0.31603	-0.232854	0.142087	-0.473591	0.317015	-0.297307	35
Q07065	CKAP4	CKAP4	#N/A	#N/A	Cytoskeleton-associated protein 4	0.0803847	-0.124786	0.191942	-0.0311646	0.431676	-0.0368811	0.240009	-0.203236	0.316783	-0.03402	49
Q6P996;H3BND4;Q86XE2	PDXDC1	PDXDC1	#N/A	#N/A	Pyridoxal-dependent decarboxylase domain-containing protein 1	-0.293341	0.00288247	0.505688	-0.28051	0.0992279	0.0103502	0.00532815	0.104068	0.316725	-0.127762	19
Q6P2P2	PRMT9	PRMT9	#N/A	#N/A	Putative protein arginine N-methyltransferase 9	0.0329472	0.0213375	0.557582	0.541317	0.0270125	-0.308573	-0.271601	-0.734491	0.316551	0.178071	7
P49116	NR2C2	NR2C2	#N/A	#N/A	Nuclear receptor subfamily 2 group C member 2	-0.130681	-0.0780154	0.397146	0.0144981	0.229588	-0.047741	0.323428	0.0329472	0.315798	-0.0162858	20
O14810;D6RI11;D6RAG3	CPLX1	CPLX1	#N/A	#N/A	Complexin-1	0.119024	-0.154827	0.473112	-0.170589	0.139077	-0.40032	0.0542234	-0.0307224	0.31574	-0.280887	6
C9JFR7;P99999	CYCS	CYCS	Known mitochondrial	#N/A	Cytochrome c	-0.0549017	-0.0200479	0.465713	0.146264	0.147958	-0.181509	0.454387	-0.0438987	0.315566	-0.00833397	16
Q9H0B6;A8MZ87	KLC2	KLC2	#N/A	#N/A	Kinesin light chain 2	0.180912	0.0385766	0.113567	0.00201835	0.492315	0.151859	0.44074	-0.162816	0.315334	0.078883	40
Q9BRJ7;K7EIN2;K7ENA3;W4VSQ8	NUDT16L1	NUDT16L1	#N/A	#N/A	Protein syndesmos	-0.121769	-0.341446	0.304745	-0.0934941	0.325732	0.111966	0.529771	0.119555	0.315276	0.0128905	15
O14735;B3KY94;H3BUR9	CDIPT	CDIPT	Predicted mitochondrial	#N/A	CDP-diacylglycerol--inositol 3-phosphatidyltransferase	0.104202	-0.0200332	0.182438	-0.0392956	0.436695	-0.0841349	0.401958	-0.615972	0.31516	-0.0615411	6
Q9H008;Q5T1Z0	LHPP	LHPP	#N/A	#N/A	Phospholysine phosphohistidine inorganic pyrophosphate phosphatase	0.245252	-0.138521	0.297837	-0.0137128	0.332278	-0.0714819	0.220206	-0.342726	0.31516	-0.0423082	7
Q92643;A6NEM5;B1AK81	PIGK	PIGK	#N/A	#N/A	GPI-anchor transamidase	-0.0799811	-0.156289	0.328837	-0.0438095	0.300417	0.00934718	0.245131	-0.093956	0.314697	-0.0169864	14
Q04446;E9PGM4	GBE1	GBE1	#N/A	#N/A	1,4-alpha-glucan-branching enzyme	0.632268	0.0727232	0.218347	-0.123497	0.404576	0.107018	0.255561	-0.0301625	0.314465	-0.00364017	19
P22492	HIST1H1T	HIST1H1T	#N/A	#N/A	Histone H1t	0.432318	0.032524	0.363339	0.0611541	0.263395	-0.0890678	0.503857	0.174662	0.314232	-0.0120025	12
Q9NR45	NANS	NANS	#N/A	#N/A	Sialic acid synthase	0.358734	0.0553346	0.35208	-0.0282928	0.274888	-0.0802252	0.144568	-0.059029	0.314	-0.0540253	22
O00299	CLIC1	CLIC1	Predicted mitochondrial	#N/A	Chloride intracellular channel protein 1	0.294312	0.0295589	0.207643	-0.0476366	0.412836	-0.073955	0.341416	-0.104961	0.313884	-0.0607358	20
O95292	VAPB	VAPB	Predicted mitochondrial	#N/A	Vesicle-associated membrane protein-associated protein B/C	0.14965	-0.0716032	0.292664	0.018919	0.334683	-0.0632735	0.392757	-0.110184	0.313826	-0.021592	18
P20340	RAB6A	RAB6A	#N/A	#N/A	Ras-related protein Rab-6A	0.0633648	-0.0572416	0.123136	-0.0684531	0.482126	0.00288247	0.283803	-0.22457	0.313768	-0.0323444	20
Q5JS54;D6RB92;D6REN3;E2QRC7;H7C465	PSMG4	PSMG4	#N/A	#N/A	Proteasome assembly chaperone 4	1.37334	0.705845	0.649294	0.342555	-0.126187	-0.058518	0.0794293	0.268794	0.313043	0.155911	6
P17174	GOT1	GOT1	#N/A	#N/A	Aspartate aminotransferase, cytoplasmic	0.299714	0.11929	0.425352	0.167229	0.190425	-0.0586833	0.0246034	-0.0281309	0.312665	0.0586905	32
O43505	B4GAT1	B4GAT1	#N/A	#N/A	Beta-1,4-glucuronyltransferase 1	-0.131835	0.0223323	0.187641	-0.073287	0.427392	-0.0911103	0.164529	-0.357973	0.312491	-0.0821711	11
Q9H488	POFUT1	POFUT1	#N/A	#N/A	GDP-fucose protein O-fucosyltransferase 1	0.213005	0.106616	0.373843	0.151079	0.247442	-0.0753528	0.0263043	-0.0412092	0.312026	0.0423011	14
Q6VY07;B4DF77	PACS1	PACS1	#N/A	#N/A	Phosphofurin acidic cluster sorting protein 1	0.372283	-0.0936635	0.180912	-0.169388	0.431676	-0.177409	0.272859	-0.4655	0.311736	-0.173393	22
P09211;A8MX94	GSTP1	GSTP1	Predicted mitochondrial	#N/A	Glutathione S-transferase P	0.336398	0.132906	0.498659	0.198997	0.0959919	-0.0754592	0.0274371	0.0533895	0.311329	0.0682856	19
P48739;A0A0A0MSW4	PITPNB	PITPNB	#N/A	#N/A	Phosphatidylinositol transfer protein beta isoform	0.0646069	-0.0367627	0.380286	0.0606008	0.23842	-0.0154471	0.261832	0.0630888	0.311096	0.0230779	25
P31946	YWHAB	YWHAB	#N/A	#N/A	14-3-3 protein beta/alpha;14-3-3 protein beta/alpha, N-terminally processed	0.29007	0.119157	0.246347	0.0992279	0.372841	0.0425042	0.282855	0.0731348	0.31098	0.0711448	29
Q12974	PTP4A2	PTP4A2	#N/A	#N/A	Protein tyrosine phosphatase type IVA 2	0.157044	0.0107799	0.334797	0.224287	0.28629	0.220701	0.114767	0.111833	0.310747	0.222495	7
Q9GZU8;H3BP64;H3BUL4;H3BMX9;H3BTP8;H3BSY6;H3BTI2;H3BQQ6;Q6P4H7;H3BSF0	FAM192A;NIP30	FAM192A	#N/A	#N/A	Protein FAM192A	0.0568609	0.0894982	0.576474	0.141694	-0.0153596	0.0880058	0.156008	0.0697021	0.310695	0.1151	13
Q9HB07;F8VQQ3;F8VR84	C12orf10	C12orf10	Known mitochondrial	#N/A	UPF0160 protein MYG1, mitochondrial	0.213378	0.0568609	0.340619	0.0797024	0.279768	-0.129103	0.155102	-0.0407788	0.310515	-0.0209258	15
Q13630;E9PKL9;E9PP14;A0A0J9YX13;E9PLH9	TSTA3	TSTA3	#N/A	#N/A	GDP-L-fucose synthase	0.427821	0.0243196	0.326997	0.11929	0.29337	0.0238941	0.318809	-0.151602	0.310282	0.0723803	13
J3KR35;Q8WUD4;C9JUN5	CCDC12	CCDC12	#N/A	#N/A	Coiled-coil domain-containing protein 12	-0.268938	0.231801	0.56267	0.0697021	0.00417777	0.0988237	0.0356239	0.214249	0.310282	0.0843364	7
Q8NHU6	TDRD7	TDRD7	Known mitochondrial	#N/A	Tudor domain-containing protein 7	0.135141	-0.226898	0.407081	-0.0229326	0.205393		0.160275		0.309758		2
A0A0B4J294;H3BP13;Q9UL33;H3BUK6;A0A0B4J286;H3BQQ8	TRAPPC2L	TRAPPC2L	#N/A	#N/A	Trafficking protein particle complex subunit 2-like protein	0.248292	0.0632269	0.109695	0.171335	0.482539	-0.187214	0.0385766	-0.502096	0.308128	0.00317041	4
Q9UHY7;A0A0C4DGY8;D6RA00	ENOPH1	ENOPH1	#N/A	#N/A	Enolase-phosphatase E1	0.314755	0.0126402	0.226139	0.0747794	0.383829	-0.00688366	0.238053	0.101247	0.307137	0.0345256	13
Q92791;K7ERA3	LEPREL4;P3H4	LEPREL4	#N/A	#N/A	Synaptonemal complex protein SC65	-0.0516832	0.0346383	0.52657	0.168	0.0480967	0.0447438	0.414677	-0.0543923	0.307079	0.107688	8
P55795	HNRNPH2	HNRNPH2	#N/A	#N/A	Heterogeneous nuclear ribonucleoprotein H2	0.216362	0.0268709	0.267476	0.0440444	0.344715	-0.0397701	0.293017	0.0319598	0.306612	0.00274571	30
Q8N9I9;A0A0C4DGI8;F8VUZ4	DTX3	DTX3	#N/A	#N/A	Probable E3 ubiquitin-protein ligase DTX3	0.123401	-0.00553615	0.355242	0.357158	0.256045	0.339821			0.306496	0.348516	6
Q9Y316	MEMO1	MEMO1	#N/A	#N/A	Protein MEMO1	0.402176	0.270589	0.379732	0.174023	0.228726	-0.114957	0.126841	0.0854246	0.306204	0.0367565	15
P00568;Q5T9B7	AK1	AK1	#N/A	#N/A	Adenylate kinase isoenzyme 1	0.414244	0.129217	0.22885	-0.0317396	0.37951	0.0169242	0.27023	-0.0255294	0.306146	-0.00720252	15
Q9NTJ4	MAN2C1	MAN2C1	#N/A	#N/A	Alpha-mannosidase 2C1	0.350384	0.128557	0.383276	0.25084	0.224658	0.0795658	0.339821	0.114367	0.306146	0.167743	10
P46736;A0A087WZR3;H9KVA9;A0A0D9SF50;X6RJS7	BRCC3	BRCC3	#N/A	#N/A	Lys-63-specific deubiquitinase BRCC36	0.242084	0.301119	0.379177	0.0635029	0.228234	0.0893625	0.0927488	-0.139856	0.305679	0.0764907	12
Q9Y315;E9PPM8;E9PML7;G3V158	DERA	DERA	#N/A	#N/A	Deoxyribose-phosphate aldolase	0.20201	-0.069785	0.506399	0.354452	0.0714881	-0.097255	-0.132325	0.0850168	0.30527	0.146205	19
Q9UHQ4;C9JTE9;H7C5E2;C9IYK6;B7Z2L0;H0Y7N8;F8WB99	BCAP29	BCAP29	#N/A	#N/A	B-cell receptor-associated protein 29	0.185232	-0.106094	0.132379	-0.124629	0.458697	-0.0388361	0.323889	-0.34077	0.304745	-0.0810948	8
Q9Y547;A6NIR2;X6R7Y7	HSPB11	HSPB11	#N/A	#N/A	Intraflagellar transport protein 25 homolog	0.486972	0.223052	0.399445	0.770702	0.203013	0.133958			0.304569	0.487178	2
O75145;R4GN36	PPFIA3	PPFIA3	#N/A	#N/A	Liprin-alpha-3	-0.296244	-0.498525	0.1644	-0.304576	0.431676	0.0187766	0.570074	0.166587	0.304219	-0.13386	18
P63279;H3BQQ9;B0QYN7;H3BPC4	UBE2I	UBE2I	#N/A	#N/A	SUMO-conjugating enzyme UBC9	0.485118	0.435522	0.488824	0.407625	0.0918014	-0.11516	-0.102233	-0.011428	0.303927	0.169784	12
A0A0A0MS70;H0Y4G9;Q99836;A0A0A0MSI9;A0A3F2YP85;A0A494C0J8	MYD88	MYD88	#N/A	#N/A	Myeloid differentiation primary response protein MyD88			0.436375	-0.493703	0.15782	-0.22398	0.704518	0.0311129	0.30381	-0.352547	10
Q9UQB8;I3L4C2;B4DWA1	BAIAP2	BAIAP2	#N/A	#N/A	Brain-specific angiogenesis inhibitor 1-associated protein 2	0.245861	-0.0337319	0.292428	-0.0806675	0.314986	0.0291349	0.288772	-0.283843	0.303751	-0.024722	27
Q13057	COASY	COASY	Known mitochondrial	#N/A	Bifunctional coenzyme A synthase;Phosphopantetheine adenylyltransferase;Dephospho-CoA kinase	0.570463	0.172231	0.276556	0.182311	0.330329	-0.0297795	0.343578	-0.0131449	0.303693	0.0801596	21
Q71U36;P0DPH8;P0DPH7;A0A1W2PQM2	TUBA1A	TUBA1A	Predicted mitochondrial	#N/A	Tubulin alpha-1A chain	0.210763	0.172616	0.145743	0.252658	0.445621	0.0129261	0.239398	-0.0908183	0.303459	0.137766	44
Q8TAD4;Q9BY48	SLC30A5	SLC30A5	#N/A	#N/A	Zinc transporter 5			0.397584	-0.0725435	0.202637	0.115566	0.0174944	-0.0047253	0.303401	0.024575	2
Q9Y2H6	FNDC3A	FNDC3A	#N/A	#N/A	Fibronectin type-III domain-containing protein 3A	0.0779266	-0.0360525	0.342555	-0.131724	0.261711	-0.0350026	0.207018	-0.0567763	0.302699	-0.082553	24
O60725	ICMT	ICMT	#N/A	#N/A	Protein-S-isoprenylcysteine O-methyltransferase			0.275961	0.0688772	0.328377	0.0176369	-0.0039005	-0.117975	0.302407	0.0434845	4
P62993;J3KT38;J3QRL5	GRB2	GRB2	#N/A	#N/A	Growth factor receptor-bound protein 2	0.0347792	0.0347792	0.234624	0.105008	0.366476	0.0220482	0.215741	-0.0757632	0.302056	0.0641241	25
P11166	SLC2A1	SLC2A1	#N/A	#N/A	Solute carrier family 2, facilitated glucose transporter member 1	0.459851	-0.0846398	0.428142	-0.0152867	0.16337	-0.0395179	0.352646	0.156138	0.301822	-0.0273514	8
F5GYH1;A0A1W2PRM0;A0A1W2PRL5;A0A1W2PR09;Q8NC96;A0A1W2PNT6;F5H2U7	NECAP1	NECAP1	#N/A	#N/A	Adaptin ear-binding coat-associated protein 1	-0.200233	-0.168431	0.275484	-0.222162	0.327228	-0.313889	0.266757	0.27262	0.301588	-0.267297	8
Q96GZ6;D6RF72;D6R9S7;D6R9M9;D6RHE3;D6RDB0;D6R9X6	SLC41A3	SLC41A3	#N/A	#N/A	Solute carrier family 41 member 3	-0.181657	-0.183327	0.311038	0.341075	0.291957	-0.177604	0.325732	0.091666	0.301529	0.10492	2
P50336;A0A494C146;A0A494C0D4;H0YFP3	PPOX	PPOX	Known mitochondrial	#N/A	Protoporphyrinogen oxidase	-0.155839	0.365245	0.573859	0.206768	-0.0350174	-0.337685	0.207268	-0.100824	0.301307	-0.0399258	14
O14672	ADAM10	ADAM10	#N/A	#N/A	Disintegrin and metalloproteinase domain-containing protein 10	-0.267184	-0.123748	0.410015	-0.168285	0.183328	-0.184834	0.0154976	-0.220648	0.301119	-0.176536	15
Q96BM9	ARL8A	ARL8A	#N/A	#N/A	ADP-ribosylation factor-like protein 8A	-0.0339683	-0.139188	0.122209	-0.0416844	0.459956	-0.112615	0.302992	-0.456049	0.300944	-0.0767139	12
P43034	PAFAH1B1	PAFAH1B1	#N/A	#N/A	Platelet-activating factor acetylhydrolase IB subunit alpha	0.340847	0.107688	0.232783	0.0415233	0.366028	-0.00339428	0.2587	0.015212	0.300944	0.0192393	34
E9PM92;O00193;E9PRZ9;E9PQA1	C11orf58;SMAP	C11orf58	#N/A	#N/A	Small acidic protein	0.406319	0.0792927	0.418136	0.201258	0.173	-0.105985	0.187134	0.106884	0.300768	0.0557996	9
O60831;A6NM71	PRAF2	PRAF2	#N/A	#N/A	PRA1 family protein 2	-0.00849355	-0.319964	0.160146	-0.175599	0.428571	0.0668125	0.209017	-0.475314	0.300592	-0.0493076	8
Q9NUY8;E9PGE5	TBC1D23	TBC1D23	#N/A	#N/A	TBC1 domain family member 23	0.152768	0.340049	0.379621	0.0267293	0.216982	-0.0388805	-0.014966	0.0354831	0.300592	-0.00570268	9
Q07812;K4JQN1	BAX	BAX	Known mitochondrial	#N/A	Apoptosis regulator BAX	-0.154153	-0.194278	0.354452	0.0297002	0.244644	-0.196641	0.23634	-0.205131	0.300592	-0.079036	9
P14618;B4DNK4	PKM	PKM	Predicted mitochondrial	#N/A	Pyruvate kinase PKM;Pyruvate kinase	0.365581	0.185613	0.387032	0.227741	0.208392	0.0113525	0.0997664	0.0963968	0.300475	0.1236	61
Q7Z4H8	KDELC2	KDELC2	#N/A	#N/A	KDEL motif-containing protein 2	0.282973	0.117163	0.240009	0.062398	0.357496	0.0791561	0.220825	-0.152885	0.299948	0.0708014	20
Q16222	UAP1	UAP1	#N/A	#N/A	UDP-N-acetylhexosamine pyrophosphorylase;UDP-N-acetylgalactosamine pyrophosphorylase;UDP-N-acetylglucosamine pyrophosphorylase	0.341644	0.243303	0.31034	0.244644	0.288772	0.35682	0.000721115	0.643487	0.299596	0.301822	12
A0A087WYL5	SEZ6L2	SEZ6L2	#N/A	#N/A		-0.253584	-0.197683	0.394843	-0.335717	0.196859	-0.2041	0.262674	-0.406924	0.299245	-0.268408	21
Q0VDG4	SCRN3	SCRN3	#N/A	#N/A	Secernin-3	0.412619	0.110497	0.361319	0.18954	0.234379	-0.164706	0.125651	-0.0796	0.299245	0.0232625	13
Q8WZA0;K7ES95	LZIC	LZIC	#N/A	#N/A	Protein LZIC	0.243182	-0.0834317	0.297954	-0.00342325	0.300065	-0.0650684	0.124196	-0.090972	0.29901	-0.0339166	12
Q9HDC9;H0Y512	APMAP	APMAP	#N/A	#N/A	Adipocyte plasma membrane-associated protein	0.0816123	-0.0814917	0.205768	-0.0458037	0.385486	0.00187425	0.119821	-0.259392	0.298424	-0.0217678	25
P60763;J3KSC4;J3QLK0	RAC3	RAC3	#N/A	#N/A	Ras-related C3 botulinum toxin substrate 3	0.238053	0.183201	0.227495	0.0697021	0.365469	-0.099139	0.112233	-0.285372	0.29813	-0.0122499	11
P36871;A0A3B3ITK7	PGM1	PGM1	#N/A	#N/A	Phosphoglucomutase-1	0.278817	0.0661237	0.32987	0.0586628	0.264717	-0.0814917	0.147437	-0.0796153	0.297661	-0.00971314	53
A0A087X0R6;Q9UMY4	SNX12	SNX12	#N/A	#N/A	Sorting nexin-12	0.333996	0.0905825	0.253989	0.0159258	0.340049	-0.0687254	0.143263	-0.281597	0.297661	-0.025779	15
Q13445;K7EIN4;K7EQ63	TMED1	TMED1	#N/A	#N/A	Transmembrane emp24 domain-containing protein 1	0.355467	-0.037414	0.200379	-0.204433	0.388355	-0.0127956	0.348686	0.0206267	0.297426	-0.105434	8
Q9H4A4;A6NKB8	RNPEP	RNPEP	#N/A	#N/A	Aminopeptidase B	0.190425	0.0576928	0.177854	-0.071679	0.407733	0.000432815	0.204141	-0.0694065	0.297367	-0.0351726	39
Q969Q5;F8W8H5	RAB24	RAB24	Known mitochondrial	#N/A	Ras-related protein Rab-24	-0.0916021	0.0308304	0.0200577	0.00432164	0.529471	0.135535	0.0265876	-0.218112	0.297133	0.0714195	6
A0A0A0MTL5;Q13309;D6R9R7	SKP2	SKP2	#N/A	#N/A	S-phase kinase-associated protein 2			0.422879	0.824075	0.158466	0.601506	-0.983846	0.111833	0.296722	0.717079	5
P78417;Q5TA02;Q5TA01	GSTO1	GSTO1	#N/A	#N/A	Glutathione S-transferase omega-1	0.326077	0.117961	0.419431	0.108223	0.161694	-0.0764324	0.0610158	-0.023783	0.296311	0.0188478	21
Q7L5N7	LPCAT2	LPCAT2	#N/A	#N/A	Lysophosphatidylcholine acyltransferase 2	0.220701	-0.354003	0.366476	-0.265379	0.222063	-0.136965	0.0506061	-0.225514	0.296076	-0.199744	22
P46063	RECQL	RECQL	#N/A	#N/A	ATP-dependent DNA helicase Q1	0.488104	0.0817487	0.188274	-0.00555066	0.395721	-0.00155892	0.355693	0.0209111	0.295723	-0.00355341	42
Q96TA1	FAM129B	FAM129B	#N/A	#N/A	Niban-like protein 1	0.464564	0.139993	0.23842	-0.0425014	0.350724	-0.223795	0.201258	-0.184834	0.295664	-0.130302	28
Q12765;C9K052	SCRN1	SCRN1	#N/A	#N/A	Secernin-1	0.0780633	-0.0209551	0.187134	-0.0597054	0.394953	-0.0746233	0.235237	-0.209428	0.294782	-0.0671451	21
Q06124	PTPN11	PTPN11	Known mitochondrial	#N/A	Tyrosine-protein phosphatase non-receptor type 11	0.217107	0.0795658	0.306845	-0.00623147	0.282499	-0.0297206	0.0392789	0.0411028	0.294724	-0.0179282	32
U3KPY1;U3KQB0;P61218;U3KQS8;F8WC47;B0QYL8;B0QYL9	POLR2F	POLR2F	#N/A	#N/A	DNA-directed RNA polymerases I, II, and III subunit RPABC2	0.0553346	0.12499	0.42191	0.326652	0.154324	0.0943712	0.0949116	0.18574	0.294312	0.215182	3
E7ERI8;E7EW49	CLASP2	CLASP2	#N/A	#N/A		0.109962	0.0878702	0.0270125	-0.0836915	0.519642	0.0319598	0.318924	-0.169031	0.294253	-0.0247073	56
A0A024R442;E7ETB3;Q9ULA0;E7EMB6;C9JBE1	DNPEP	DNPEP	#N/A	#N/A	Aspartyl aminopeptidase	0.246104	0.249991	0.337654	0.0265876	0.249385	-0.299844	0.108892	-0.0802404	0.294194	-0.127415	16
Q96CP2;I3L1Y9;I3L4I0	FLYWCH2	FLYWCH2	#N/A	#N/A	FLYWCH family member 2	0.0295589	-0.0989226	0.314174	-0.253481	0.273456	-0.294809	-0.00382825	-0.477583	0.293959	-0.273997	9
Q9NYU2	UGGT1	UGGT1	#N/A	#N/A	UDP-glucose:glycoprotein glucosyltransferase 1	0.122739	-0.0802252	0.198997	-0.0440624	0.38228	-0.0346627	0.202512	-0.153013	0.293547	-0.0393549	94
Q9UBQ0;F8VXU5	VPS29	VPS29	#N/A	#N/A	Vacuolar protein sorting-associated protein 29	0.204141	0.0802483	0.27262	0.0335111	0.313594	-0.0354609	0.214747	0.0251707	0.293253	-0.000562794	11
J3KNF4;O14618;E9PP76	CCS	CCS	Known mitochondrial	#N/A	Copper chaperone for superoxide dismutase;Superoxide dismutase [Cu-Zn]	0.16877	0.0742315	0.120485	0.190678	0.446997	-0.18825	0.327112	-0.291186	0.292958	0.0136194	9
E9PAK5;O75064	DENND4B	DENND4B	#N/A	#N/A	DENN domain-containing protein 4B	0.16221	-0.355645	0.195348	0.1503	0.384271	0.244035			0.292899	0.197928	4
A0A087WSV8;P80303;E9PKG6;Q2L696;E9PLR0;E9PLE9;A0A2R8Y6G7	NUCB2;Nucb2	NUCB2	Known mitochondrial	#N/A	Nucleobindin-2;Nesfatin-1	0.173128	-0.0879787	0.160017	0.0104934	0.413702	-0.00959692	0.242084	-0.225143	0.292428	0.000483233	18
Q969N2;A0A1W2PNP0;A0A1W2PPS0;A0A1W2PPC3;A0A1W2PP57;A0A1W2PPR6;A0A1W2PQN1;A0A1W2PP53;A0A1W2PRZ8;F6W983;A0A1W2PPQ7;A0A1W2PR92;A0A1W2PP13;A0A1W2PRH2	PIGT	PIGT	#N/A	#N/A	GPI transamidase component PIG-T	-0.198477	-0.0964063	0.159371	-0.0841349	0.414136	0.00144204	0.192321	-0.171856	0.292369	-0.040712	20
Q9Y4P8	WIPI2	WIPI2	#N/A	#N/A	WD repeat domain phosphoinositide-interacting protein 2	0.374288	0.248292	0.378512	0.591201	0.200002	-0.246447	-0.0632132	-0.318326	0.292016	0.232335	13
Q8WWV3;G3V1R2	RTN4IP1	RTN4IP1	Known mitochondrial	#N/A	Reticulon-4-interacting protein 1, mitochondrial			0.620868	-0.234075	-0.134857	-0.207394	0.0576928	0.18916	0.291934	-0.220673	6
P17612;Q15136;K7ERP6	PRKACA;KIN27	PRKACA	Known mitochondrial	#N/A	cAMP-dependent protein kinase catalytic subunit alpha	0.168899	0.0250289	0.290188	-0.0750336	0.293253	0.0123541	0.260387	-0.0558312	0.291721	-0.0306782	26
Q8IXM6;H0Y6T6	NRM	NRM	#N/A	#N/A	Nurim	0.383608	0.0801119	0.271306	0.00374607	0.310805	0.116631	0.101112	-0.191524	0.291191	0.0612923	6
Q92934	BAD	BAD	Known mitochondrial	#N/A	Bcl2-associated agonist of cell death	0.00848693	0.0377336	0.448267	-0.0338058	0.114767	-0.119354	0.474877	0.118891	0.291132	-0.0759457	7
Q3YEC7;H0Y4Z8;F2Z2T0;G3V154	RABL6	RABL6	#N/A	#N/A	Rab-like protein 6	0.154324	0.0817487	0.376179	0.118626	0.20063	0.0792927	-0.0564162	0.00302647	0.291073	0.0990932	21
Q9HCM3	KIAA1549	KIAA1549	#N/A	#N/A	UPF0606 protein KIAA1549			0.49293	-0.0574067	0.0554733	-0.213788	0.196103	-0.081049	0.290719	-0.13348	9
A0A2U3TZH3;Q05639	EEF1A2	EEF1A2	#N/A	#N/A	Elongation factor 1-alpha 2	0.262914	-0.0445831	0.123666	-0.159605	0.439676	-0.00410306	0.256528	-0.264062	0.290306	-0.0797601	40
H0Y9S9;A0A087WWN8	PPIP5K2	PPIP5K2	#N/A	#N/A		0.287827	0.168257	0.418568	0.0177795	0.147958	0.0468402	0.0829751	0.145743	0.289598	0.032383	13
Q9UL26	RAB22A	RAB22A	#N/A	#N/A	Ras-related protein Rab-22A	0.339821	0.0852886	0.408494	0.0918014	0.159629	-0.0163223	0.228973	0.0380147	0.289421	0.0387522	9
P54725;A0A494C0B4;K7ENJ0;K7ELW1	RAD23A	RAD23A	#N/A	#N/A	UV excision repair protein RAD23 homolog A	0.105142	-0.0823468	0.237074	-0.0834775	0.339137	-0.110199	0.283685	-0.174279	0.289008	-0.0967766	13
P26232;A0A0A0MRI5	CTNNA2	CTNNA2	#N/A	#N/A	Catenin alpha-2	-0.0174755	-0.130287	0.129876	-0.111913	0.432211	0.0999011	0.542506	-0.0547369	0.288949	-0.00212232	55
Q01538;A0A0G2JS52;Q6P6D5	MYT1	MYT1	#N/A	#N/A	Myelin transcription factor 1	-0.0918634	-0.342762	0.363676	0.172616	0.210015	0.0750534	0.204892	-0.249393	0.28889	0.124659	23
E9PNW4;A0A2U3TZL5;P13987;H0YET2	CD59	CD59	#N/A	#N/A	CD59 glycoprotein	-0.0746537	-0.152212	0.243669	0.10742	0.332622	-0.0384656	0.338111	-0.173157	0.288831	0.0363204	6
Q9NVJ2	ARL8B	ARL8B	Predicted mitochondrial	#N/A	ADP-ribosylation factor-like protein 8B	-0.168528	-0.494881	0.191815	0.212756	0.379288	-0.0647666	0.244278	-0.0436905	0.288595	0.0806577	10
P09382	LGALS1	LGALS1	#N/A	#N/A	Galectin-1	0.0977456	-0.0367478	0.154065	0.0377336	0.411535	-0.105085	0.259664	-0.149601	0.288536	-0.0319092	18
Q9NP80;A0A0C4DG51	PNPLA8	PNPLA8	Known mitochondrial	#N/A	Calcium-independent phospholipase A2-gamma	0.199248	-0.159057	0.244035	0.13606	0.331591	0.0472592	0.315566	-0.330538	0.288477	0.0923428	14
Q01813;B1APP6	PFKP	PFKP	#N/A	#N/A	ATP-dependent 6-phosphofructokinase, platelet type	0.269153	0.0418037	-0.0159575	-0.108052	0.538041	0.0243196	0.310107	-0.237898	0.287472	-0.0403486	55
P49903;Q5T5U6	SEPHS1	SEPHS1	#N/A	#N/A	Selenide, water dikinase 1	0.285225	0.193204	0.340733	0.231678	0.231064	0.101784	-0.028028	0.153027	0.28694	0.168193	14
A0A0C4DGB0;Q9UIL1	SCOC	SCOC	#N/A	#N/A	Short coiled-coil protein	-0.0990772	-0.0334957	0.32239	0.0812032	0.250477	-0.0973784	0.307312	-0.129813	0.286881	-0.00532619	6
P49591;Q5T5C7	SARS	SARS	#N/A	#N/A	Serine--tRNA ligase, cytoplasmic	0.319155	0.17645	0.449746	0.230818	0.102053	0.0706641	0.0517201	0.133958	0.286349	0.152962	36
Q15154	PCM1	PCM1	#N/A	#N/A	Pericentriolar material 1 protein	0.174918	0.208642	0.454702	0.377068	0.0943712	-0.0985055	0.104202	0.0961269	0.285757	0.158789	20
P08133;E5RK69;E7EMC6	ANXA6	ANXA6	Predicted mitochondrial	#N/A	Annexin A6;Annexin	0.260387	-0.0731504	0.179001	-0.0681506	0.384823	-0.189335	0.177216	-0.312187	0.28558	-0.127471	63
P62328	TMSB4X	TMSB4X	#N/A	#N/A	Thymosin beta-4;Hematopoietic system regulatory peptide	-0.232447	0.0371714	0.265077	0.345737	0.304394	0.0284277	0.265197	0.13014	0.284869	0.195788	8
P68402	PAFAH1B2	PAFAH1B2	#N/A	#N/A	Platelet-activating factor acetylhydrolase IB subunit beta	0.391548	0.163112	0.336855	0.152508	0.230326	-0.161863	0.182184	0.0130691	0.284573	0.00386846	13
P13489;H0YCR7	RNH1	RNH1	#N/A	#N/A	Ribonuclease inhibitor	0.351176	0.0238941	0.234501	-0.144393	0.332966	-0.0367478	0.233765	-0.0316954	0.284573	-0.0895666	31
P27540;A6NGV6	ARNT	ARNT	#N/A	#N/A	Aryl hydrocarbon receptor nuclear translocator	-0.223138	0.0426443	0.268434	0.477159	0.300299	0.378955	0.115699	0.218843	0.284455	0.428893	8
Q6ZXV5	TMTC3	TMTC3	Predicted mitochondrial	#N/A	Transmembrane and TPR repeat-containing protein 3	-0.00962592	-0.178192	0.236952	-0.212584	0.329411	0.0192037	0.211386	-0.0358158	0.283922	-0.0920403	23
Q5XUX1	FBXW9	FBXW9	#N/A	#N/A	F-box/WD repeat-containing protein 9	0.240864	0.274769	0.4246	0.127501	0.127369	-0.423991	0.169155	0.343578	0.283626	-0.122052	8
O14974;F8VZN8	PPP1R12A	PPP1R12A	#N/A	#N/A	Protein phosphatase 1 regulatory subunit 12A	0.284396	-0.0800269	0.293488	-0.107803	0.273456	-0.04375	0.254231	-0.0794018	0.283507	-0.0754212	36
Q9GZP4	PITHD1	PITHD1	#N/A	#N/A	PITH domain-containing protein 1	0.295841	0.181675	0.385818	0.139339	0.172616	0.081476	0.293017	-0.0506219	0.283151	0.110697	12
P62875	POLR2L	POLR2L	#N/A	#N/A	DNA-directed RNA polymerases I, II, and III subunit RPABC5	0.382501	0.413486	0.619742	0.344942	-0.158735	-0.0906032	-0.0608035	0.125387	0.282386	0.143544	5
M0QYT0			#N/A	#N/A		0.0871912	0.00848693	0.256407	0.0650208	0.307545	-0.0830801	0.477677	0.0487942	0.282203	-0.00713006	21
F5H6L7;Q9UPR5	SLC8A2	SLC8A2	#N/A	#N/A	Sodium/calcium exchanger 2	-0.0514888	-0.0853131	-0.16728	-0.110293	0.624148	-0.0355644	0.488001	-0.322072	0.282036	-0.0724448	3
Q5VWV2;Q8TEW0;Q5VWU8;F5GZI3	PARD3	PARD3	#N/A	#N/A	Partitioning defective 3 homolog	-0.138696	0.0943712	0.153676	-0.131424	0.399335	0.170438	-0.221522	-0.0645402	0.281728	0.0273876	12
A0A0A0MS41;Q9BWM7;A0A1P0AYU5;S4R3N9	SFXN3	SFXN3	Known mitochondrial	#N/A	Sideroflexin;Sideroflexin-3	-0.146691	-0.0697244	0.0409626	-0.165354	0.487589	-0.124881	0.583134	-0.296811	0.281491	-0.144975	24
P00338	LDHA	LDHA	#N/A	#N/A	L-lactate dehydrogenase A chain	0.37128	0.111699	0.380508	0.231187	0.173895	-0.0318576	0.108759	0.0374524	0.280897	0.105651	36
Q5MNZ6	WDR45B	WDR45B	#N/A	#N/A	WD repeat domain phosphoinositide-interacting protein 3	-0.258684	0.0863761	0.311271	-0.340587	0.249142	0.309176	0.133564	0.301939	0.280541	0.0205697	10
O94973;A0A0G2JS82	AP2A2	AP2A2	#N/A	#N/A	AP-2 complex subunit alpha-2	-0.0746385	-0.105877	0.0608775	-0.213939	0.471031	-0.0715728	0.422879	-0.155309	0.280481	-0.141001	47
P50402;Q5HY57	EMD	EMD	#N/A	#N/A	Emerin	0.237197	0.012068	0.227248	-0.0488001	0.331705	-0.0858642	0.35208	-0.0898814	0.280422	-0.0672131	22
A0A087X1N3;O75818;X6RLL4;F8WC38	RPP40	RPP40	#N/A	#N/A	Ribonuclease P protein subunit p40	-0.138934	-0.285143	0.467592	-0.087059	0.0652966	-0.0717396	-0.0501887	-0.0343376	0.280422	-0.079379	7
Q13867;K7ES02;J3KSD8;K7ESE8	BLMH	BLMH	#N/A	#N/A	Bleomycin hydrolase	0.223546	0.114634	0.378623	0.209391	0.172359	0.0539454	0.146655	0.0271541	0.279174	0.133761	33
P42684	ABL2	ABL2	#N/A	#N/A	Abelson tyrosine-protein kinase 2	-0.326896	-0.182066	-0.282246	-0.247457	0.681854	0.0825664			0.278883	-0.073029	6
P48723	HSPA13	HSPA13	#N/A	#N/A	Heat shock 70 kDa protein 13	-0.131645	-0.0364815	0.205893	-0.0502634	0.347552	-0.0259112	0.151859	-0.0549617	0.278461	-0.0380359	11
Q13526;K7EN45;K7EMU7	PIN1	PIN1	#N/A	#N/A	Peptidyl-prolyl cis-trans isomerase NIMA-interacting 1	0.323889	0.173255	0.237319	0.122607	0.317651	0.110096	0.312317	0.173767	0.278044	0.116365	11
Q96DZ1	ERLEC1	ERLEC1	#N/A	#N/A	Endoplasmic reticulum lectin 1	-0.100964	-0.100608	0.19131	-0.0580974	0.359634	-0.0187318	0.185486	-0.372748	0.277925	-0.0382804	14
Q15019	SEPT2	SEPT2	#N/A	#N/A	Septin-2	0.146264	-0.0149806	0.319965	0.041243	0.234501	-0.105613	0.158596	-0.130081	0.277866	-0.0303172	29
O43707	ACTN4	ACTN4	#N/A	#N/A	Alpha-actinin-4	0.225768	0.0130691	0.389787	0.0698396	0.155879	-0.094187	0.27011	0.00403388	0.277568	-0.00984383	82
Q6ZVM7;B7Z2U2	TOM1L2	TOM1L2	#N/A	#N/A	TOM1-like protein 2	0.22132	0.0213375	0.337768	-0.222111	0.214	-0.179139	0.305562	-0.174182	0.277211	-0.200465	13
Q9BW62	KATNAL1	KATNAL1	#N/A	#N/A	Katanin p60 ATPase-containing subunit A-like 1	0.347779	0.422125	0.230572	0.180148	0.322159	-0.215932	0.311619	0.00201835	0.277092	-0.00434182	11
A0A0A6YYH1;Q7Z6K5	C15orf38-AP3S2;ARPIN	C15orf38-AP3S2	#N/A	#N/A	Arpin			-0.0743499	0.202386	0.559247	0.11836			0.276955	0.160985	6
Q2TAA5;A0A3B3ISU2	ALG11	ALG11	#N/A	#N/A	GDP-Man:Man(3)GlcNAc(2)-PP-Dol alpha-1,2-mannosyltransferase	0.180148	-0.218514	0.0312541	-0.192365	0.486663	-0.12904	0.320311	0.0357646	0.276854	-0.160355	10
P20020;E7ERY9	ATP2B1	ATP2B1	#N/A	#N/A	Plasma membrane calcium-transporting ATPase 1;Calcium-transporting ATPase	-0.0421003	-0.141621	0.224905	-0.110589	0.326767	-0.0258232	0.188274	-0.230804	0.276735	-0.0675835	32
Q96S90	LYSMD1	LYSMD1	#N/A	#N/A	LysM and putative peptidoglycan-binding domain-containing protein 1	0.252295	-0.0222878	0.140517	-0.248913	0.399773	-0.148033	-0.0118207	-0.182655	0.275961	-0.197592	7
Q6P3W7;A0A0U1RQQ9;F8VSC5	SCYL2	SCYL2	#N/A	#N/A	SCY1-like protein 2	0.0897694	-0.0914484	0.15549	-0.0822093	0.385928	-0.0334071	0.054779	-0.0656873	0.275305	-0.0576018	21
P50583	NUDT2	NUDT2	Predicted mitochondrial	#N/A	Bis(5-nucleosyl)-tetraphosphatase [asymmetrical]	0.443288	0.291957	0.213876	0.259303	0.331017	0.0311129	0.333195	-0.0387027	0.273635	0.149715	6
Q96S52	PIGS	PIGS	#N/A	#N/A	GPI transamidase component PIG-S	-0.0324772	-0.0962984	0.206643	-0.0892366	0.337311	-0.040126	0.173128	-0.232193	0.273456	-0.0644723	16
F5H8L0;B7ZAP0	RABGAP1L	RABGAP1L	#N/A	#N/A	Rab GTPase-activating protein 1-like, isoform 10			0.193961	-0.671393	0.347439	-0.580267			0.27274	-0.625111	7
Q9Y680	FKBP7	FKBP7	#N/A	#N/A	Peptidyl-prolyl cis-trans isomerase FKBP7	-0.053898	-0.381348	0.445939	0.218719	0.075738	-0.104558	-0.0741221	0.0966667	0.27268	0.0661168	10
Q13546	RIPK1	RIPK1	#N/A	#N/A	Receptor-interacting serine/threonine-protein kinase 1	0.725261	0.175301	0.143916	-0.275716	0.390117	0.10044	0.290542	-0.226881	0.272262	-0.0754135	8
A0A3B3ITH3;Q9P2X3	IMPACT	IMPACT	#N/A	#N/A	Protein IMPACT	0.673195	0.0992279	0.205518	0.162726	0.335483	-0.00781167	0.37128	-0.0269692	0.271963	0.0799754	5
Q8WUW1	BRK1	BRK1	#N/A	#N/A	Protein BRICK1	0.113834	-0.0162931	0.165044	-0.0163223	0.371392	-0.0598407	0.122739	-0.0875954	0.271904	-0.0379175	8
C9JLT7;A0A1X7SBT4;H0Y2P9;Q8TBF5;C9JF71;C9JFU3;F8WEJ3;H7C0F2	PIGX	PIGX	#N/A	#N/A	Phosphatidylinositol-glycan biosynthesis class X protein			0.281194	0.268913	0.262553	0.141694	0.439889	0.193456	0.271904	0.206706	6
Q15768	EFNB3	EFNB3	#N/A	#N/A	Ephrin-B3	-0.21068	0.195096	0.584289	-0.182721	-0.12751	-0.693201	0.446997	-0.486752	0.27185	-0.415499	10
A0A0A0MQU4;Q96I15;H7C3V9	SCLY	SCLY	#N/A	#N/A	Selenocysteine lyase	0.353888	0.105812	0.340733	-0.0753224	0.199248	-0.0983202	0.0116388	-0.106513	0.271724	-0.0867755	18
A0A1W2PRB8			#N/A	#N/A		0.133037	0.0713507	0.144046	0.133564	0.388796	0.0571383	0.225028	0.104739	0.271605	0.0958569	15
Q7Z3U7;A0A286YFF8;F8VZV1	MON2	MON2	#N/A	#N/A	Protein MON2 homolog	0.0113525	0.0284277	-0.117803	-0.231007	0.576474	0.218595	0.182692	-0.116927	0.270702	0.011238	25
Q9Y664;M0QXX4	KPTN	KPTN	#N/A	#N/A	Kaptin	0.226385	0.0480967	0.518535	0.358284	-0.0293966	-0.307716			0.270427	0.0633787	3
Q9Y281	CFL2	CFL2	#N/A	#N/A	Cofilin-2	0.378401	0.12618	0.379954	0.145221	0.151079	-0.0735602	0.0705267	0.0350608	0.27005	0.0399736	19
Q5T8U5;O15260	SURF4	SURF4	#N/A	#N/A	Surfeit locus protein 4	0.311038	-0.0431256	0.115699	0.00374607	0.409255	-0.00434902	0.226262	-0.134366	0.269931	-0.000295797	7
P61296;A0A087WT70;H0YAH1	HAND2	HAND2	#N/A	#N/A	Heart- and neural crest derivatives-expressed protein 2	-0.0169499	-0.119887	0.307079	-0.243916	0.230818	-0.179384	0.357271	0.212134	0.269452	-0.211289	9
H3BTL1;Q9GZQ8;A6NCE7	MAP1LC3B;MAP1LC3B2	MAP1LC3B	#N/A	#N/A	Microtubule-associated proteins 1A/1B light chain 3B;Microtubule-associated proteins 1A/1B light chain 3 beta 2	-0.0749576	-0.0559812	0.0457225	-0.0219069	0.462785	-0.0852365	0.424385	-0.153077	0.269273	-0.0532243	7
Q969U7;K7ENR6;V9GZ55	PSMG2	PSMG2	#N/A	#N/A	Proteasome assembly chaperone 2	0.413811	0.130008	0.35208	0.315914	0.181039	0.210264	-0.0834317	0.158466	0.269093	0.264056	7
Q96HQ2	CDKN2AIPNL	CDKN2AIPNL	#N/A	#N/A	CDKN2AIP N-terminal-like protein	0.25411	-0.047562	0.374177	0.365021	0.15549	1.15244	0.196607	0.287236	0.268973	0.8118	5
O43399;A0A087WYR3;A0A087WZ51	TPD52L2	TPD52L2	#N/A	#N/A	Tumor protein D54	0.259785	0.0368901	0.438825	0.0278618	0.0760118	-0.0162785	0.157173	-0.0328609	0.268794	0.00596046	22
H7BY58;A0A0A0MRJ6;P22061;F6S8N6;A0A3F2YNX8	PCMT1	PCMT1	Predicted mitochondrial	#N/A	Protein-L-isoaspartate O-methyltransferase;Protein-L-isoaspartate(D-aspartate) O-methyltransferase	0.204266	0.0676387	0.273098	0.0739573	0.263395	-0.129387	0.186881	-0.152548	0.268255	-0.0241351	16
Q96IG2;J3KTA1	FBXL20	FBXL20	#N/A	#N/A	F-box/LRR-repeat protein 20	0.301705	-0.0946029	0.233397	0.133827	0.302173	-0.116098	-0.192744	-0.549134	0.268195	0.0142696	6
P42858	HTT	HTT	#N/A	#N/A	Huntingtin	0.181548	0.0932897	0.25411	-0.0203258	0.281787	-0.082362	0.0802483	-0.33898	0.268015	-0.0510105	75
Q8IZ83;F5H4B6	ALDH16A1	ALDH16A1	#N/A	#N/A	Aldehyde dehydrogenase family 16 member A1	0.366364	0.0536674	0.487795	0.189287	0.00662125	-0.122177	-0.112927	-0.129418	0.267176	0.0419438	18
Q12860	CNTN1	CNTN1	#N/A	#N/A	Contactin-1	-0.323696	0.017922	0.155231	0.0597706	0.370945	-0.0513992	0.29725	-0.218145	0.267116	0.00525622	54
P43378;A0A0A0MR09	PTPN9	PTPN9	#N/A	#N/A	Tyrosine-protein phosphatase non-receptor type 9;Protein-tyrosine-phosphatase	0.203264	-0.0180743	0.184725	0.00690831	0.344828	-0.190618	0.290778	-0.063379	0.266996	-0.0884772	10
Q13561;F8W1I6;H0YI98;F8VW18	DCTN2	DCTN2	#N/A	#N/A	Dynactin subunit 2	0.102457	0.0601858	0.177216	0.0588013	0.351402	-0.0735754	0.173895	-0.0409866	0.266936	-0.00586927	33
E9PFH7;A0A087WYG2;Q9UPT6	MAPK8IP3	MAPK8IP3	#N/A	#N/A	C-Jun-amino-terminal kinase-interacting protein 3	-0.166438	-0.0797982	0.185105	-0.293147	0.343578	0.0511633	0.290424	-0.131076	0.266517	-0.110744	34
P28070	PSMB4	PSMB4	#N/A	#N/A	Proteasome subunit beta type-4	0.258579	0.141171	0.363115	-0.00996002	0.16221	-0.0646609	0.1133	-0.0649325	0.266157	-0.0370512	10
P30419	NMT1	NMT1	#N/A	#N/A	Glycylpeptide N-tetradecanoyltransferase 1	0.389457	0.125519	0.349139	0.143916	0.176323	-0.102341	0.143132	-0.148993	0.265317	0.0260351	31
Q16720	ATP2B3	ATP2B3	#N/A	#N/A	Plasma membrane calcium-transporting ATPase 3	-0.276415	-0.0306193	0.169027	-0.269025	0.355467	-0.336191	0.357833	-0.701107	0.265257	-0.302217	26
Q9NRZ5	AGPAT4	AGPAT4	Known mitochondrial	#N/A	1-acyl-sn-glycerol-3-phosphate acyltransferase delta	-0.588096	-0.0168769	-0.320198	-0.22945	0.680504	-0.0158555	0.408603	-0.256683	0.265233	-0.118703	10
Q9Y3D6	FIS1	FIS1	Known mitochondrial	Peroxisomedb	Mitochondrial fission 1 protein	0.037312	-0.0180012	0.267356	-0.0660497	0.262313	-0.19626	0.517528	-0.0830954	0.264837	-0.129687	10
Q643R3;A0A0C4DGT4	LPCAT4	LPCAT4	#N/A	#N/A	Lysophospholipid acyltransferase LPCAT4	-0.515913	-0.290603	-0.250114	-0.266767	0.643487	0.0404014	0.139339	-0.18007	0.264795	-0.105023	11
P18669	PGAM1	PGAM1	#N/A	#N/A	Phosphoglycerate mutase 1	0.506805	0.214622	0.298072	0.195726	0.229588	-0.116285	0.0563061	-0.0137566	0.264236	0.0481385	24
P29992;K7EL62	GNA11	GNA11	#N/A	#N/A	Guanine nucleotide-binding protein subunit alpha-11	0.10017	-0.111399	0.174662	-0.130287	0.348346	-0.052117	0.45249	-0.202306	0.264116	-0.0906724	27
Q9NVS9;J3QQV6;J3QQZ9	PNPO	PNPO	Known mitochondrial	#N/A	Pyridoxine-5-phosphate oxidase	0.452174	0.202762	0.218967	0.0852886	0.307195	0.153546	-0.0237977	0.207768	0.263756	0.119821	8
O15075;Q5VZY9	DCLK1	DCLK1	#N/A	#N/A	Serine/threonine-protein kinase DCLK1	0.0123541	-0.103209	-0.203967	-0.395549	0.616169	-0.286779	0.501617	-0.404955	0.263611	-0.340139	21
P51153	RAB13	RAB13	#N/A	#N/A	Ras-related protein Rab-13	-0.0846703	-0.0611496	0.372729	-0.142895	0.144177	-0.0405859	0.0475383	-0.026161	0.262974	-0.0908336	13
Q96C19;H0Y4Y4	EFHD2	EFHD2	#N/A	#N/A	EF-hand domain-containing protein D2	0.42191	0.0422241	0.200379	0.00201835	0.322505	-0.00552165	0.143393	-0.157979	0.262734	-0.00174672	12
P21397	MAOA	MAOA	Known mitochondrial	#N/A	Amine oxidase [flavin-containing] A	-0.329377	-0.539058	0.0939657	-0.0918481	0.41186	0.0104934	0.543001	-0.137632	0.261651	-0.03977	13
Q66LE6	PPP2R2D	PPP2R2D	#N/A	#N/A	Serine/threonine-protein phosphatase 2A 55 kDa regulatory subunit B delta isoform	0.0526941	0.0156403	0.125519	-0.249393	0.385597	-0.0503679	-0.0592393	0.0243196	0.26141	-0.146451	11
A0A0B4J1R7;Q96B45	C10orf32-ASMT;C10orf32	C10orf32-ASMT	#N/A	#N/A	UPF0693 protein C10orf32	-0.22538	0.136716	0.381948	0.100843	0.129745	-0.260584	-0.0677423	-0.11713	0.26135	-0.0685817	4
Q9BPU6	DPYSL5	DPYSL5	#N/A	#N/A	Dihydropyrimidinase-related protein 5	0.13606	0.120883	0.233397	0.0924781	0.287709	-0.0110064	0.187768	0.00345838	0.260809	0.0416635	41
H3BU49;Q9Y2Y0	ARL2BP	ARL2BP	Known mitochondrial	#N/A	ADP-ribosylation factor-like protein 2-binding protein	0.489337	0.308244	0.270589	0.0469799	0.250962	-0.0649477	0.227987	0.15004	0.260809	-0.00789869	3
Q6P1K8;D6RID8;Q13888	GTF2H2C;GTF2H2	GTF2H2C	#N/A	#N/A	General transcription factor IIH subunit 2-like protein;General transcription factor IIH subunit 2	0.066537	0.207643	0.471968	-0.253343	0.0127833	-0.187329	0.0791561	-0.107275	0.260568	-0.219959	13
A0A0A0MTN0;Q13617;Q5T2B5	CUL2	CUL2	Known mitochondrial	#N/A	Cullin-2	0.335826	0.066537	0.286763	0.0350608	0.232906	-0.0208673	0.0990932	0.00259443	0.260086	0.00736777	31
H7BXD5;P28676;H7C2Z6	GCA	GCA	#N/A	#N/A	Grancalcin			-0.0458931	0.234869	0.512379	-0.0478752	-0.253945	-0.113052	0.26008	0.100413	7
Q9UNE7;H3BS86;H3BTA3;H3BUD0	STUB1	STUB1	#N/A	#N/A	E3 ubiquitin-protein ligase CHIP	0.216486	-0.00537681	0.116232	-0.116817	0.390558	-0.0566563	0.295488	-0.230279	0.259905	-0.0864231	22
Q8N2K0;I3L294	ABHD12	ABHD12	#N/A	#N/A	Monoacylglycerol lipase ABHD12	0.0434844	-0.105427	0.128689	-0.0524011	0.379399	-0.124456	0.227495	-0.241577	0.259483	-0.0879787	18
P30566;A0A1B0GTJ7;A0A1B0GWJ0;A0A0A6YY92;A0A1B0GWF8;A0A1B0GTG9;A0A096LNY6	ADSL	ADSL	#N/A	#N/A	Adenylosuccinate lyase	0.348006	0.1121	0.439357	0.185232	0.052555	-0.010672	0.0144981	0.151079	0.258881	0.0906028	22
Q15631;E9PGT1;H7C1D4	TSN	TSN	#N/A	#N/A	Translin	0.22033	0.132774	0.389677	0.183709	0.115033	0.059909	0.00417777	0.108357	0.258881	0.123136	20
P60981;F6RFD5	DSTN	DSTN	#N/A	#N/A	Destrin	0.379399	0.122076	0.207768	0.016211	0.308244	-0.00728955	0.23352	0.063641	0.258881	0.00450857	17
P46821	MAP1B	MAP1B	#N/A	#N/A	Microtubule-associated protein 1B;MAP1B heavy chain;MAP1 light chain LC1	0.0601858	-0.0415953	0.103128	-0.0485167	0.399226	-0.0883928	0.340391	-0.121549	0.25876	-0.068317	140
O14745	SLC9A3R1	SLC9A3R1	#N/A	#N/A	Na(+)/H(+) exchange regulatory cofactor NHE-RF1	0.145221	0.00403388	0.347666	0.132774	0.161307	-0.145845	0.038998	-0.161944	0.257493	0.000180356	23
Q9Y608	LRRFIP2	LRRFIP2	#N/A	#N/A	Leucine-rich repeat flightless-interacting protein 2	0.635522	-0.112724	0.0695647	-0.155373	0.42374	0.00805652	0.370164	-0.077589	0.257493	-0.0713455	12
O14972;A8MTY9;A8MY26	DSCR3	DSCR3	#N/A	#N/A	Down syndrome critical region protein 3	0.176833	0.0758749	0.20964	-0.151474	0.303342	-0.11115	0.212507	0.0594937	0.257252	-0.131171	7
Q5EBL4;A0A1B0GVV3	RILPL1	RILPL1	#N/A	#N/A	RILP-like protein 1	-0.197302	-0.307662	0.000288558	-0.124833	0.475189	-0.0560262	0.105142	-0.132451	0.257192	-0.0900196	12
P23381	WARS	WARS	#N/A	#N/A	Tryptophan--tRNA ligase, cytoplasmic;T1-TrpRS;T2-TrpRS	0.301119	0.18574	0.397693	0.251204	0.101381	-0.0455655	-0.0449402	0.0582473	0.257131	0.110437	37
G8JLD3;X6RLX0;Q8IUD2;X6RM00	ERC1	ERC1	#N/A	#N/A	ELKS/Rab6-interacting/CAST family member 1	0.0973411	-0.173222	0.102591	-0.0715122	0.396598	-0.0524161	0.309991	-0.0984592	0.257071	-0.0619325	35
Q9NX40;D6RG39;D6RIT9;D6RBN5;D6RDK6	OCIAD1	OCIAD1	Known mitochondrial	#N/A	OCIA domain-containing protein 1	-0.793532	-0.135554	0.163628	-0.206295	0.344715	-0.082026	0.332393	-0.124189	0.257011	-0.142823	12
Q6N022	TENM4	TENM4	#N/A	#N/A	Teneurin-4	-0.0970234	-0.307501	0.149259	-0.390756	0.356595	-0.0234164	0.0673633	-0.1908	0.256648	-0.195426	37
Q86X02	CDR2L	CDR2L	#N/A	#N/A	Cerebellar degeneration-related protein 2-like	0.275007	0.168642	-0.130523	-0.0680296	0.561399	0.0905825	0.465191	0.0797024	0.256528	0.0134551	11
Q9UBV2	SEL1L	SEL1L	#N/A	#N/A	Protein sel-1 homolog 1	0.0612924	-0.227033	0.049352	-0.115879	0.437334	0.191689	0.0370308	-0.210813	0.256346	0.0460859	13
Q96Q05;H0YBR0	TRAPPC9	TRAPPC9	#N/A	#N/A	Trafficking protein particle complex subunit 9	0.174918	-0.278391	0.202512	-0.297023	0.307895	0.0852886	0.15043	-0.239685	0.256165	-0.0932403	9
Q12768;E7EQI7	KIAA0196	KIAA0196	#N/A	#N/A	WASH complex subunit strumpellin	0.211261	0.1133	0.2806	0.0487942	0.230449	0.159888	-0.00398733	-0.214776	0.255742	0.10541	45
P21359;H0Y465;J3KSB5	NF1	NF1	#N/A	#N/A	Neurofibromin;Neurofibromin truncated	0.142609	0.213254	0.0117819	-0.0193166	0.464355	0.00417777	0.534759	0.123136	0.255742	-0.00752158	23
Q01082;A0A087WUZ3	SPTBN1	SPTBN1	#N/A	#N/A	Spectrin beta chain, non-erythrocytic 1	0.134878	-0.0910641	0.265317	-0.0699364	0.245861	-0.0587585	0.328032	0.0169242	0.255622	-0.0643366	227
Q6Y288	B3GALTL	B3GALTL	#N/A	#N/A	Beta-1,3-glucosyltransferase	0.314523	0.129349	0.318346	0.00647761	0.189919	0.0113525	0.224781	0.0651587	0.255561	0.00891712	13
Q9H1K0	RBSN	RBSN	#N/A	#N/A	Rabenosyn-5	0.251568	0.19497	0.0993626	-0.033038	0.395063	0.373063	0.199123	0.186754	0.254775	0.184255	10
P04075;J3KPS3;H3BQN4;H3BPS8;H3BUH7;H3BR04;H3BMQ8	ALDOA	ALDOA	#N/A	#N/A	Fructose-bisphosphate aldolase A;Fructose-bisphosphate aldolase	0.257735	0.136323	0.281787	0.14496	0.226878	-0.00945167	0.11929	0.0787465	0.254594	0.069819	39
Q9NX46	ADPRHL2	ADPRHL2	Known mitochondrial	#N/A	Poly(ADP-ribose) glycohydrolase ARH3	0.177727	0.124196	0.249991	0.123136	0.259062	-0.027175	0.165558	-0.0300888	0.254534	0.0499374	18
O75110;A0A0A0MR22	ATP9A	ATP9A	#N/A	#N/A	Probable phospholipid-transporting ATPase IIA;Phospholipid-transporting ATPase	-0.0872735	-0.239702	0.273934	-0.00998912	0.233152	-0.109047	-0.00523207	-0.448548	0.253687	-0.0586683	10
O43303	CCP110	CCP110	#N/A	#N/A	Centriolar coiled-coil protein of 110 kDa	0.0973411	-0.10197	0.113834	0.169284	0.381173	-0.057707	0.494364	-0.232227	0.253687	0.060248	10
P51659;A0A2R8YD50;E7EWE5;G5E9S2;E7ET17;A0A2R8Y7L2;E7ER27;E7EPL9	HSD17B4	HSD17B4	#N/A	Peroxisomedb	Peroxisomal multifunctional enzyme type 2;(3R)-hydroxyacyl-CoA dehydrogenase;Enoyl-CoA hydratase 2	0.493032	-0.0544522	0.320427	-0.0136837	0.183709	0.0275787	0.309991	0.0418037	0.253687	0.007095	46
Q16181;E7ES33;E7EPK1;G3V1Q4	SEPT7	SEPT7	#N/A	#N/A	Septin-7	0.0676387	0.03492	0.269273	0.068602	0.237931	-0.0608788	0.202512	-0.13584	0.253687	0.00531371	44
Q9NY33;G3V1D3;G3V180	DPP3	DPP3	#N/A	#N/A	Dipeptidyl peptidase 3	0.270589	0.15069	0.336626	0.23008	0.165044	-0.0509806	0.16221	0.00230651	0.253384	0.0963833	34
Q15527	SURF2	SURF2	#N/A	#N/A	Surfeit locus protein 2	0.425137	-0.0182642	0.115832	0.0867838	0.378623	0.53456			0.253203	0.327975	6
A0A494C017;C9JJV6;C9JZL8;A0A499FIY8;C9J5M0;C9JC07;Q96S97	MYADM	MYADM	#N/A	#N/A	Myeloid-associated differentiation marker	0.147176	-0.286076	0.11836	0.345396	0.376068	-0.171758	0.218843	-0.569265	0.252961	0.109869	2
Q96QR8	PURB	PURB	#N/A	#N/A	Transcriptional activator protein Pur-beta	0.277985	0.024036	0.297954	-0.031371	0.206143	0.0413831	-0.002209	-0.0471148	0.252779	0.00546462	15
Q96ME1;H0Y6I6	FBXL18	FBXL18	#N/A	#N/A	F-box/LRR-repeat protein 18	0.241962	0.0554733	0.276794	0.103934	0.228111	0.156267	0.154194	0.0816123	0.252658	0.130338	29
P35227;J3KT13;A0A087X259	PCGF2	PCGF2	#N/A	#N/A	Polycomb group RING finger protein 2	0.635522	0.0724488	-0.0279692	-0.0542425	0.486251	0.187894	-0.0550067	-0.479533	0.251931	0.0718999	10
Q92734;C9JJP5;C9JUE0;C9JTY3	TFG	TFG	#N/A	#N/A	Protein TFG	0.192068	0.1333	0.362217	0.139601	0.132248	-0.121267	0.0173518	-0.0956354	0.25181	0.0150551	16
A0A0C4DFZ1;A8MZ54;Q16623	STX1A	STX1A	#N/A	#N/A	Syntaxin-1A	-0.322199	-0.195831	0.0388575	0.00791302	0.437228	-0.13603	0.398679	-0.377819	0.251749	-0.0622639	10
Q9NRX5	SERINC1	SERINC1	#N/A	#N/A	Serine incorporator 1	-0.0209551	-0.135776	0.215119	-0.204582	0.287354	-0.137061	0.228111	-0.115269	0.251689	-0.170426	4
Q9Y3B3;A0A0A6YYA0	TMED7;TMED7-TICAM2	TMED7	#N/A	#N/A	Transmembrane emp24 domain-containing protein 7	0.369271	-0.0525208	0.145743	0.00144204	0.350158	-0.0821787	0.198494	-0.146931	0.251568	-0.0397626	11
Q9BT23;J3QQM5;J3QL69;J3KRR0	LIMD2	LIMD2	#N/A	#N/A	LIM domain-containing protein 2	-0.418408	0.0476779	0.497127	0.113167	-0.0446723	0.0666747	0.453017	0.558072	0.251513	0.0901081	9
A0A1B0GW05;Q2PZI1	DPY19L1	DPY19L1	#N/A	#N/A	Probable C-mannosyltransferase DPY19L1	0.102457	-0.096283	0.154972	0.0588013	0.341986	-0.120655	0.234011	-0.108612	0.251507	-0.0281383	19
Q01658	DR1	DR1	#N/A	#N/A	Protein Dr1	0.269871	0.14978	0.203264	0.0460021	0.297602	0.0886844	0.177216	0.0399806	0.251204	0.0675011	12
Q01433;H0Y360	AMPD2	AMPD2	Predicted mitochondrial	#N/A	AMP deaminase 2	0.102053	0.0554733	0.310689	-0.0112971	0.188907	-0.10341	0.0448837	-0.147218	0.251083	-0.0566187	40
Q14847;C9J9W2	LASP1	LASP1	#N/A	#N/A	LIM and SH3 domain protein 1	-0.0103378	-0.0190827	0.22033	-0.0510852	0.281075	-0.0984592	0.171847	0.00273846	0.251022	-0.0745778	18
Q15173;E9PNY3	PPP2R5B	PPP2R5B	#N/A	#N/A	Serine/threonine-protein phosphatase 2A 56 kDa regulatory subunit beta isoform	0.190804	0.633106	-0.116504	0.551295	0.543496	-0.83877	0.830418	1.53715	0.250913	0.0175799	8
Q14677	CLINT1	CLINT1	#N/A	#N/A	Clathrin interactor 1	0.181548	0.0661237	0.236952	0.00906043	0.264717	0.00992034	0.165558	0.0893625	0.250901	0.00949045	24
P36551	CPOX	CPOX	Known mitochondrial	#N/A	Oxygen-dependent coproporphyrinogen-III oxidase, mitochondrial	0.0323829	0.0792927	0.204642	-0.280615	0.295488	-0.0818427	0.464982	-0.146819	0.25078	-0.177808	23
Q8TB52	FBXO30	FBXO30	#N/A	#N/A	F-box only protein 30			0.601316	0.485118	-0.215513	-0.257028	0.279412	0.0471196	0.249955	0.161249	4
Q9P013	CWC15	CWC15	#N/A	#N/A	Spliceosome-associated protein CWC15 homolog	-0.129908	0.0147838	0.398131	0.292311	0.0842003	0.0258793	0.0467006	0.315914	0.249688	0.165237	14
Q96PU5;K7ERN1;A0A1B0GVY1	NEDD4L	NEDD4L	#N/A	#N/A	E3 ubiquitin-protein ligase NEDD4-like	-0.0865533	0.00619029	0.0110662	0.134878	0.454281	0.288654			0.249627	0.213814	6
Q9BZE9;J3QL04;J3QR12;J3KRY8	ASPSCR1	ASPSCR1	#N/A	#N/A	Tether containing UBX domain for GLUT4	0.265557	-0.0453867	0.353662	0.0308304	0.137372	-0.0965915	0.0716254	-0.114457	0.249567	-0.0314742	22
Q96NT1	NAP1L5	NAP1L5	#N/A	#N/A	Nucleosome assembly protein 1-like 5	0.322159	0.0395595	0.0328061	-0.121706	0.437867	0.176578	0.416299	0.0920721	0.249506	0.0351312	5
P09972;A8MVZ9;J3KSV6;J3QKP5;C9J8F3	ALDOC	ALDOC	#N/A	#N/A	Fructose-bisphosphate aldolase C;Fructose-bisphosphate aldolase	0.0535284	-0.016264	0.151469	-0.209728	0.340847	-0.215982	0.172744	-0.463947	0.249263	-0.212852	39
P48454;G3V111;H0YC26	PPP3CC	PPP3CC	#N/A	#N/A	Serine/threonine-protein phosphatase 2B catalytic subunit gamma isoform;Serine/threonine-protein phosphatase	0.158596	0.489235	0.368489	0.184725	0.118891	-0.27174	0.206018	-0.054677	0.249081	-0.0255294	10
Q9BQ04;E9PLB0;E9PM61;U3KQD5	RBM4B	RBM4B	#N/A	#N/A	RNA-binding protein 4B	0.229465	0.207143	0.127765	0.142479	0.36087	0.201634	0.386149	0.333767	0.24902	0.17236	28
P49407;E9PM35	ARRB1	ARRB1	#N/A	#N/A	Beta-arrestin-1	0.330558	0.111432	0.324926	0.196481	0.16877	0.0203421	0.190804	-0.0416844	0.24896	0.111098	14
P28482	MAPK1	MAPK1	Predicted mitochondrial	#N/A	Mitogen-activated protein kinase 1	0.167743	-0.0460718	0.209266	-0.0849764	0.287236	-0.0125772	0.361095	0.0201999	0.248778	-0.0483227	27
Q8WUD1;A0A3B3ITL1	RAB2B	RAB2B	#N/A	#N/A	Ras-related protein Rab-2B	-0.0797067	-0.184752	-0.0209112	-0.244053	0.475707	-0.102295	0.494569	-0.17568	0.248662	-0.171433	15
Q8WWN8;G5E9Y3	ARAP3	ARAP3	#N/A	#N/A	Arf-GAP with Rho-GAP domain, ANK repeat and PH domain-containing protein 3	0.188148	-0.0323887	0.405884	0.0684644	0.0716254	0.0913952	0.0738202	0.184344	0.248413	0.0799753	32
F5GXX5;P61803	DAD1	DAD1	#N/A	#N/A	Dolichyl-diphosphooligosaccharide--protein glycosyltransferase subunit DAD1	-0.11129	-0.134049	0.245496	0.155231	0.251083	0.246591	-0.0899735	-0.203219	0.248292	0.201634	3
P09497	CLTB	CLTB	#N/A	#N/A	Clathrin light chain B	0.274888	-0.0505473	0.0821575	-0.156466	0.397146	-0.0118498	0.228234	-0.058518	0.248231	-0.0823468	9
Q9H4B0	OSGEPL1	OSGEPL1	Known mitochondrial	#N/A	Probable tRNA N6-adenosine threonylcarbamoyltransferase, mitochondrial	0.0561673	0.14496	0.487795	-0.121973	-0.0401853	-0.270243	0.0687396	-0.18894	0.247824	-0.194204	5
Q14165;F5H1S8	MLEC	MLEC	Predicted mitochondrial	#N/A	Malectin	0.0683268	-0.264807	0.066537	-0.0935711	0.40806	0.146394	0.0779266	-0.258184	0.247381	0.0313952	19
Q86SF2;H0YAH3;H0YAK0	GALNT7	GALNT7	#N/A	#N/A	N-acetylgalactosaminyltransferase 7;Polypeptide N-acetylgalactosaminyltransferase	0.166073	-0.158993	0.0601858	-0.0349583	0.412511	0.241596	0.161694	0.111031	0.247077	0.109935	10
O60664;K7ERZ3	PLIN3	PLIN3	#N/A	#N/A	Perilipin-3	0.120485	-0.00333645	0.223793	-0.0141353	0.269392	-0.183589	0.13606	-0.121204	0.246773	-0.0963755	26
Q9NRW7;A0A2R8YE10;A0A2R8YD95;A0A087WU65;A0A2R8YF01;A0A1B0GXI6	VPS45	VPS45	#N/A	#N/A	Vacuolar protein sorting-associated protein 45	-0.00843551	-0.19904	0.0886844	-0.0689373	0.388575	0.0476779	0.152768	-0.17467	0.246408	-0.00945171	31
P17858	PFKL	PFKL	#N/A	#N/A	ATP-dependent 6-phosphofructokinase, liver type	0.250355	-0.0981349	0.037312	-0.203535	0.427821	-0.0356235	0.236707	-0.362937	0.245739	-0.117138	42
Q14161;F8W822	GIT2	GIT2	#N/A	#N/A	ARF GTPase-activating protein GIT2	-0.0193019	0.0797024	0.190552	-0.0307076	0.298893	-0.000822569	0.313942	-0.189384	0.245739	-0.0156877	16
O43813;E9PHS0	LANCL1	LANCL1	#N/A	#N/A	LanC-like protein 1	0.220701	0.166587	0.241718	0.0521377	0.247198	0.0263043	0.0851526	0.10675	0.244461	0.0392788	25
P84157	MXRA7	MXRA7	#N/A	#N/A	Matrix-remodeling-associated protein 7	0.163241	-0.161605	0.180784	-0.280527	0.305445	-0.233854	0.382833	-0.321225	0.244461	-0.257002	11
Q99627;E9PGT6	COPS8	COPS8	#N/A	#N/A	COP9 signalosome complex subunit 8	0.787265	0.683562	0.340391	0.449641	0.141564	-0.0166288	-0.0525059	0.234011	0.2444	0.235261	8
J3KPF9;A0A087X011;E9PES4;Q9Y496	KIF3A	KIF3A	#N/A	#N/A	Kinesin-like protein;Kinesin-like protein KIF3A	0.216113	0.219835	0.0928839	-0.0508611	0.381394	0.00532815	0.390117	-0.105442	0.244339	-0.0224929	29
Q53EL6	PDCD4	PDCD4	#N/A	#N/A	Programmed cell death protein 4	0.182311	0.131326	0.289362	0.0881415	0.197488	0.0829751	0.0996318	0.0962619	0.244156	0.0855606	26
Q16656;C9JP85	NRF1	NRF1	#N/A	#N/A	Nuclear respiratory factor 1	-0.071967	-0.099649	0.245009	0.095722	0.24306	0.0123541	-0.294031	-0.0267929	0.244035	0.0546402	9
Q9NRY2	INIP	INIP	#N/A	#N/A	SOSS complex subunit C	-0.0735299	-0.0866912	0.592732	-0.4656	-0.216887	-0.142927	0.307662	0.196481	0.243986	-0.295261	4
Q5VW32;F5GXQ0	BROX	BROX	#N/A	#N/A	BRO1 domain-containing protein BROX	0.191436	0.0592169	0.354678	0.032242	0.124063	0.0264459	0.166458	0.152638	0.243974	0.0293469	16
D6RCD0	HSD17B11	HSD17B11	#N/A	#N/A		0.1153	-0.0124608	0.259785	0.0994973	0.227864	-0.0652948	0.127105	-0.126077	0.243913	0.0194529	19
Q13011;M0R248	ECH1	ECH1	Known mitochondrial	Peroxisomedb	Delta(3,5)-Delta(2,4)-dienoyl-CoA isomerase, mitochondrial	-0.029809	-0.104635	0.172231	-0.065793	0.311271	-0.174589	0.477574	-0.0969308	0.243425	-0.119166	21
Q86TM6;E9PMA1	SYVN1	SYVN1	#N/A	#N/A	E3 ubiquitin-protein ligase synoviolin	0.106348	-0.112912	0.217231	0.137504	0.268434	0.0926134	0.227495	-0.0669411	0.24306	0.115233	8
A0A2R8YFK2;A0A2R8Y6M6;A0A2R8Y4C2;A0A2R8YFS8;A0A2R8Y8C4;A0A2R8Y5C9;A0A2R8Y596;P56945;A0A2R8Y5E4	BCAR1	BCAR1	#N/A	#N/A	Breast cancer anti-estrogen resistance protein 1	0.514198	0.095587	0.26111	0.146655	0.224287	0.0196308	0.4336	-0.272175	0.242816	0.0845406	8
A0A0B4J1S8;Q9UBF8	PI4KB	PI4KB	#N/A	#N/A	Phosphatidylinositol 4-kinase beta	0.0859685	0.0783365	-0.015943	-0.0125772	0.462052	0.424492	0.56306	0.0781998	0.242761	0.222446	11
P61960;H0Y614	UFM1	UFM1	#N/A	#N/A	Ubiquitin-fold modifier 1	0.194465	-0.00337989	0.29725	0.181039	0.18612	-0.0886076	0.144308	0.0100636	0.242755	0.0525063	4
A0A2R8Y6L5;A0A2R8Y6I6;Q13627;A0A2R8YDF3;A0A2R8Y443	DYRK1A	DYRK1A	#N/A	#N/A	Dual specificity tyrosine-phosphorylation-regulated kinase 1A	0.107286	0.537346	0.349026	0.678613	0.126841	0.0319598	-0.047562	-0.125809	0.242206	0.391218	12
H0YA93;Q86UW6	N4BP2	N4BP2	#N/A	#N/A	NEDD4-binding protein 2	0.179893	-0.154827	0.353097	-0.790609	0.12075	0.19333	0.224658	0.0149266	0.241596	-0.216334	11
Q9BSJ8	ESYT1	ESYT1	Predicted mitochondrial	#N/A	Extended synaptotagmin-1	0.112633	-0.0616013	0.10608	-0.0829273	0.364797	-0.0797525	0.383386	-0.185146	0.24123	-0.081339	54
O14531;Q5T0Q6	DPYSL4	DPYSL4	Predicted mitochondrial	#N/A	Dihydropyrimidinase-related protein 4	0.105142	0.136454	0.246834	0.187641	0.234624	0.052555	0.229834	0.0797024	0.240742	0.121679	38
E7ESW6;Q6ZQQ6	WDR87	WDR87	#N/A	#N/A	WD repeat-containing protein 87			0.466236	0.00805652	-0.0269692	-0.0778783			0.240607	-0.0342711	4
Q6NXE6;B4E1N1	ARMC6	ARMC6	#N/A	#N/A	Armadillo repeat-containing protein 6	0.240253	0.390007	0.630592	0.374066	-0.29573	0.210888	-0.305949	0.0486547	0.240534	0.294782	11
Q01650	SLC7A5	SLC7A5	#N/A	#N/A	Large neutral amino acids transporter small subunit 1	0.0103502	-0.166989	0.139731	-0.00597068	0.334568	0.257131	0.103531	-0.00392947	0.240436	0.13157	4
P42126;Q96DC0;H3BS70	ECI1;DCI	ECI1	Known mitochondrial	#N/A	Enoyl-CoA delta isomerase 1, mitochondrial	-0.251779	-0.32072	0.095587	-0.500075	0.370834	-0.173092	0.560128	-0.255116	0.239765	-0.327339	14
Q9BTL3;A0A3B3IU46	FAM103A1	FAM103A1	#N/A	#N/A	RNMT-activating mini protein	-0.194526	-0.0439582	0.295723	0.0560286	0.180657	-0.199968	0.0690147	0.179638	0.239337	-0.0662989	6
Q96GG9;C9JVE2;C9J8R4	DCUN1D1	DCUN1D1	#N/A	#N/A	DCN1-like protein 1;DCN1-like protein	0.121679	0.173895	0.221692	0.123666	0.256528	0.0187766	0.0343565	0.136323	0.239215	0.0721744	7
P68133;P68032;P63267;P62736;A6NL76	ACTA1;ACTC1;ACTG2;ACTA2	ACTA1	#N/A	#N/A	Actin, alpha skeletal muscle;Actin, alpha cardiac muscle 1;Actin, gamma-enteric smooth muscle;Actin, aortic smooth muscle	0.352758	0.134878	0.198746	0.118758	0.276913	0.0287106	0.153805	0.113567	0.238359	0.074437	28
Q9UBQ7;U3KQ56	GRHPR	GRHPR	Known mitochondrial	#N/A	Glyoxylate reductase/hydroxypyruvate reductase	0.263155	0.133169	0.211635	0.0370308	0.264356	-0.0544522	0.240375	-0.138648	0.238237	-0.00798572	17
O75886	STAM2	STAM2	#N/A	#N/A	Signal transducing adapter molecule 2	0.324695	-0.114754	0.146786	0.024036	0.323889	0.129349	0.395502	0.148348	0.238053	0.0776532	7
A0A3B3IT47;Q9Y2I8;E7EQ49;A0A087WTQ2	WDR37	WDR37	#N/A	#N/A	WD repeat-containing protein 37	0.408821	0.0912597	0.0691523	-0.217608	0.389236	0.220825	0.394514	0.367483	0.238053	0.0181998	16
P62253	UBE2G1	UBE2G1	#N/A	#N/A	Ubiquitin-conjugating enzyme E2 G1;Ubiquitin-conjugating enzyme E2 G1, N-terminally processed			0.184217	0.459641	0.288772	0.132906	0.429321	0.257976	0.237441	0.305504	3
E9PLK3;P55786	NPEPPS	NPEPPS	#N/A	#N/A	Puromycin-sensitive aminopeptidase	0.138945	0.0454429	0.283092	0.105544	0.190046	-0.0197991	0.107018	-0.0394883	0.237319	0.0442332	60
Q16566	CAMK4	CAMK4	#N/A	#N/A	Calcium/calmodulin-dependent protein kinase type IV	0.272023	0.0589399	0.0913952	-0.182606	0.369718	-0.130192	0.36793	-0.308627	0.237258	-0.156161	28
P35613;A0A087X2B5;I3L192;A0A087WUV8	BSG	BSG	Predicted mitochondrial	#N/A	Basigin	-0.0664576	-0.185212	0.267955	0.237197	0.205768	-0.0686497	0.017922	-0.168366	0.237197	0.0923631	9
Q8IUH3	RBM45	RBM45	#N/A	#N/A	RNA-binding protein 45	0.0241777	0.0268709	0.31904	-0.0642687	0.14965	0.0843364	0.182057	0.00748262	0.236829	0.0119464	12
Q8IUE1;Q8IUE0	TGIF2LX;TGIF2LY	TGIF2LX	#N/A	#N/A	Homeobox protein TGIF2LX;Homeobox protein TGIF2LY	0.125254	-0.0963446	0.23352	0.0742315	0.240009	-0.317553	0.275007	-0.0156221	0.236768	-0.108402	14
Q9NX08	COMMD8	COMMD8	#N/A	#N/A	COMM domain-containing protein 8	0.1141	0.160533	0.2529	0.0278618	0.219587	0.0216219	0.0048968	0.103665	0.236339	0.0247452	8
P54727;Q5W0S5	RAD23B	RAD23B	#N/A	#N/A	UV excision repair protein RAD23 homolog B	0.182565	0.0455827	0.242572	0.0265876	0.229219	-0.0774367	0.0905825	-0.0328461	0.235911	-0.0244872	18
P47755;F8W9N7;A0A0D9SET8	CAPZA2	CAPZA2	#N/A	#N/A	F-actin-capping protein subunit alpha-2	0.196355	0.158725	0.210763	0.0603242	0.260146	0.0457225	0.228726	0.0384361	0.235666	0.0530418	19
Q92990	GLMN	GLMN	#N/A	#N/A	Glomulin	0.217851	0.147176	0.248049	0.229711	0.222557	0.0863761	-0.00487007	-0.0079277	0.235359	0.159823	13
E9PFP8;P57721;J3QT27	PCBP3	PCBP3	#N/A	#N/A	Poly(rC)-binding protein 3	0.0404014	0.0695647	0.0777899	-0.0504128	0.37629	-0.183867	0.174279	-0.287483	0.234747	-0.115597	14
A0A087X0W7;A0A087WT95;P49753	ACOT2	ACOT2	Known mitochondrial	Peroxisomedb	Acyl-coenzyme A thioesterase 2, mitochondrial	0.126709	0.264717	0.441058	0.25882	-0.00695607	-0.179939	0.28889	-0.051429	0.234373	0.0560563	23
Q9NZC9;H7BYI2	SMARCAL1	SMARCAL1	#N/A	#N/A	SWI/SNF-related matrix-associated actin-dependent regulator of chromatin subfamily A-like protein 1	-0.311542	-0.300928	0.307195	-0.102032	0.157303	-0.600271	0.143785	0.041243	0.234195	-0.329749	10
Q96DE0	NUDT16	NUDT16	#N/A	#N/A	U8 snoRNA-decapping enzyme	0.512783	0.339023	0.597698	0.555914	-0.252948	0.0586628	-0.10118	0.101919	0.234182	0.328607	9
P26583;D6R9A6	HMGB2	HMGB2	#N/A	#N/A	High mobility group protein B2	0.310573	0.131589	0.329411	0.114767	0.131458	0.0381553	0.195977	0.144568	0.233827	0.0769695	27
A0A494C1N0;P26885	FKBP2	FKBP2	Predicted mitochondrial	#N/A	Peptidyl-prolyl cis-trans isomerase FKBP2	0.0850168	-0.0705271	0.0557509	-0.251195	0.391988	0.0156403	0.231678	-0.176903	0.233643	-0.111617	13
Q9NXR7;F8W733	BRE	BRE	#N/A	#N/A	BRCA1-A complex subunit BRE	0.265197	0.0353423	0.377624	0.121148	0.0727232	0.0969364	-0.139872	0.121281	0.233213	0.109093	16
O14576;A0A0A0MTG2	DYNC1I1	DYNC1I1	#N/A	#N/A	Cytoplasmic dynein 1 intermediate chain 1			-0.0649477	-0.106591	0.479541	0.182311	0.269871	0.144308	0.232833	0.0450794	3
P08253	MMP2	MMP2	#N/A	#N/A	72 kDa type IV collagenase;PEX	-0.557433	-0.223879	0.216734	-0.187346	0.248656	-0.487399	0.161694	-0.449552	0.232783	-0.329586	24
Q9Y6H1;Q5T1J5	CHCHD2;CHCHD2P9	CHCHD2	Known mitochondrial	#N/A	Coiled-coil-helix-coiled-coil-helix domain-containing protein 2;Putative coiled-coil-helix-coiled-coil-helix domain-containing protein CHCHD2P9, mitochondrial	0.0551957	0.0775164	0.683472	0.0892269	-0.426296	-0.288135	0.0840642	-0.112475	0.232765	-0.0871509	5
O15511;B1ALC0	ARPC5	ARPC5	#N/A	#N/A	Actin-related protein 2/3 complex subunit 5	0.0968015	0.0172092	0.161694	0.0746424	0.299948	-0.0593897	0.129217	-0.135729	0.232477	0.00918232	9
Q9UKB3;S4R3E2	DNAJC12	DNAJC12	#N/A	#N/A	DnaJ homolog subfamily C member 12	-0.465739	0.471135	0.0261627	0.875387	0.412836	0.0506061	-0.329939	-0.133432	0.232415	0.521151	8
P60983;G3V4P8	GMFB	GMFB	Predicted mitochondrial	#N/A	Glia maturation factor beta	0.329755	0.0736831	0.274649	0.12075	0.188781	-0.093371	0.0751904	-0.123733	0.232354	0.0176582	13
Q9NVZ3;F6SKB8;D6RB24;D6RAN6	NECAP2	NECAP2	#N/A	#N/A	Adaptin ear-binding coat-associated protein 2	0.365804	-0.051444	0.214622	0.649569	0.249142	-0.0347809	0.313478	-0.0468168	0.231985	0.347598	8
Q86VS8	HOOK3	HOOK3	#N/A	#N/A	Protein Hook homolog 3	-0.0137274	0.0257376	0.103263	0.00705191	0.348686	-0.121691	-0.0369254	-0.295819	0.231187	-0.0558837	24
P60709;A0A2R8Y793	ACTB	ACTB	Known mitochondrial	#N/A	Actin, cytoplasmic 1;Actin, cytoplasmic 1, N-terminally processed	0.334454	0.0867838	0.226632	0.117695	0.235359	0.00100953	0.190552	0.0497701	0.231002	0.0605317	49
P62879;E7EP32;C9JXA5;C9JIS1;C9JZN1	GNB2	GNB2	#N/A	#N/A	Guanine nucleotide-binding protein G(I)/G(S)/G(T) subunit beta-2	-0.0697547	0.0564447	0.0384361	0.00590291	0.399991	-0.0448806	0.332622	-0.230601	0.23051	-0.0192654	20
P84095	RHOG	RHOG	#N/A	#N/A	Rho-related GTP-binding protein RhoG	0.093425	0.0378742	0.148739	-0.0407046	0.307079	0.152118	0.204892	-0.110449	0.23008	0.058926	11
Q15257;Q5T949;Q5T948	PPP2R4	PPP2R4	#N/A	#N/A	Serine/threonine-protein phosphatase 2A activator	0.243303	0.0969364	0.264356	0.0489336	0.193835	-0.145127	0.216486	-0.112802	0.229526	-0.044836	22
Q15286;F5H157	RAB35	RAB35	Known mitochondrial	#N/A	Ras-related protein Rab-35	0.113834	-0.0722248	0.193961	0.0760118	0.263996	-0.00455164	0.210888	-0.126896	0.229403	0.0362924	12
Q9UN36;G3V4S9;H0YJT9;G3V578;G3V5H8;A0A0A0MS87;G3V2I9	NDRG2	NDRG2	#N/A	#N/A	Protein NDRG2			0.0949116	-0.346683	0.35242	0.090718	-0.26979	-0.2859	0.229403	-0.111469	7
P51797	CLCN6	CLCN6	#N/A	#N/A	Chloride transport protein 6	-0.261085	0.126709	0.100843	-0.23033	0.347099	-0.377276	0.0395595	5.07558	0.229219	-0.301933	12
P28074	PSMB5	PSMB5	#N/A	#N/A	Proteasome subunit beta type-5	0.304394	0.217231	0.334797	0.135798	0.115033	-0.058473	0.0968015	-0.0588636	0.229096	0.0419299	21
P48553	TRAPPC10	TRAPPC10	#N/A	#N/A	Trafficking protein particle complex subunit 10	0.256528	0.324119	0.0655723	-0.639917	0.375512	-0.273256	0.0839282	-0.234652	0.228849	-0.444969	18
Q8NCW5	APOA1BP	APOA1BP	Known mitochondrial	#N/A	NAD(P)H-hydrate epimerase	0.20389	-0.0248834	0.279055	0.0817487	0.175045	-0.351295	0.128821	-0.173596	0.227987	-0.118586	19
Q15435;H7C003;C9J177;C9JD73;B5MBZ8	PPP1R7	PPP1R7	#N/A	#N/A	Protein phosphatase 1 regulatory subunit 7	0.360083	0.192194	0.286526	0.149259	0.166972	-0.0729835	0.154194	0.0833836	0.227987	0.0424132	30
Q68DH5	LMBRD2	LMBRD2	#N/A	#N/A	LMBR1 domain-containing protein 2	-0.618539	0.183328	-0.0389546	-0.250457	0.452279	0.180403	0.605305	0.112233	0.22747	-0.0190022	9
O00161;H3BP15;H3BQY9;H3BV99	SNAP23	SNAP23	#N/A	#N/A	Synaptosomal-associated protein 23;Synaptosomal-associated protein	0.0913952	0.00647761	0.559149	0.545277	-0.2041	0.877352	-0.386393	-0.132878	0.227421	0.720848	8
Q15723	ELF2	ELF2	#N/A	#N/A	ETS-related transcription factor Elf-2	-0.105722	-0.0380952	0.379732	0.43157	0.0568609	0.314058	0.10541	0.299714	0.22731	0.37401	7
Q6IAA8;F5GX19;F5H3Y3;H0YFI1;F5H479	LAMTOR1	LAMTOR1	#N/A	#N/A	Ragulator complex protein LAMTOR1	-0.0173441	-0.122209	0.205768	0.00100953	0.247928	-0.111383	0.147437	-0.279967	0.227002	-0.0540927	9
Q96S59	RANBP9	RANBP9	#N/A	#N/A	Ran-binding protein 9	-0.217038	0.0549179	-0.097857	0.123136	0.490673	0.110497	-0.047249	-0.0632434	0.226213	0.11683	14
P17655	CAPN2	CAPN2	#N/A	#N/A	Calpain-2 catalytic subunit	0.197614	0.0257376	0.259785	0.0701146	0.191815	-0.145031	0.0528332	-0.0864154	0.2262	-0.0334514	40
P18206	VCL	VCL	#N/A	#N/A	Vinculin	0.222063	-0.0410609	0.249021	-0.0132323	0.202888	-0.123748	0.168	-0.0797525	0.226139	-0.0674323	80
Q9NZN3	EHD3	EHD3	#N/A	#N/A	EH domain-containing protein 3	0.122474	-0.00788421	0.161823	0.0230425	0.287472	-0.0493225	0.13014	0.0284277	0.226015	-0.0126864	33
O60784;B0QY01;Q6UW50	TOM1	TOM1	#N/A	#N/A	Target of Myb protein 1	0.206768	-0.146483	0.141171	-0.277342	0.305912	0.0713507	0.454808	0.0756011	0.225892	-0.0924863	13
O75436;S4R3Q6	VPS26A	VPS26A	#N/A	#N/A	Vacuolar protein sorting-associated protein 26A	0.169155	0.0194884	0.178237	-0.0410609	0.271665	0.0233263	0.0751904	0.03492	0.225707	-0.00850813	23
Q96HE7	ERO1L	ERO1L	#N/A	#N/A	ERO1-like protein alpha	0.0196308	-0.136712	0.179129	-0.0664123	0.270828	-0.151618	0.0734089	-0.309091	0.225707	-0.108386	38
Q9BT78;D6RFN0;D6RAX7;D6RD63	COPS4	COPS4	#N/A	#N/A	COP9 signalosome complex subunit 4	0.294077	0.156655	0.24184	0.0560286	0.209266	0.0057592	0.131721	0.0885487	0.225645	0.0311128	33
A0A1W2PNV4			#N/A	#N/A		0.193835	0.0536674	0.123534	0.0761487	0.32008	-0.0611045	0.11063	-0.0530446	0.225152	0.0091537	41
Q9H1Y0;A0A2R8Y718;A0A1B0GV54;A0A1B0GUS1;L7UQJ2	ATG5	ATG5	#N/A	#N/A	Autophagy protein 5			0.33754	0.128161	0.103263	0.000576886	0.229219		0.225152	0.0657791	8
Q96B36;H9KV91	AKT1S1	AKT1S1	#N/A	#N/A	Proline-rich AKT1 substrate 1	0.182819	0.199876	0.359184	0.0529723	0.0762854	-0.160621	-0.00118347	-0.245933	0.224658	-0.049875	6
Q5T321;A0A0D9SF28;F5GXV7;Q8NFP9	NBEA	NBEA	#N/A	#N/A	Neurobeachin	0.109695	0.0330882	0.0695647	-0.1811	0.364348	-0.0422042	0.147567	-0.0413875	0.224472	-0.109981	51
P49902	NT5C2	NT5C2	#N/A	#N/A	Cytosolic purine 5-nucleotidase	0.18612	0.0157831	0.314986	0.191815	0.127633	0.0878702	0.184725	0.0274371	0.224349	0.140779	22
Q14194;E9PD68	CRMP1	CRMP1	#N/A	#N/A	Dihydropyrimidinase-related protein 1	0.0201999	0.0251707	0.097476	-0.0168039	0.340619	-0.0324182	0.228111	-0.10431	0.224164	-0.0245899	43
Q9H1D9	POLR3F	POLR3F	#N/A	#N/A	DNA-directed RNA polymerase III subunit RPC6	0.351855	-0.193816	0.480989	0.331132	-0.0893747	-0.0324625	0.0919367	0.0920721	0.223812	0.160759	3
Q99943	AGPAT1	AGPAT1	#N/A	#N/A	1-acyl-sn-glycerol-3-phosphate acyltransferase alpha	-0.00807279	-0.0937867	0.197236	0.0825664	0.249506	-0.278636	0.155102	-0.183687	0.223608	-0.0867601	11
Q9H5Q4	TFB2M	TFB2M	Known mitochondrial	#N/A	Dimethyladenosine transferase 2, mitochondrial	-0.832873	-0.0176799	0.751292	0.420186	-0.617787	-0.0616314	-0.324256	0.29007	0.223404	0.199299	14
P01112	HRAS	HRAS	#N/A	#N/A	GTPase HRas;GTPase HRas, N-terminally processed	-0.218665	-0.162509	0.129481	0.081885	0.311271	-0.0400073	0.201885	-0.184752	0.223237	0.0222258	15
O95155	UBE4B	UBE4B	#N/A	#N/A	Ubiquitin conjugation factor E4 B	0.033652	-0.089206	0.199374	-0.114707	0.245861	0.00619029	0.0698396	0.0661237	0.222805	-0.0529922	29
Q9HAB8	PPCS	PPCS	#N/A	#N/A	Phosphopantothenate--cysteine ligase	0.174918	-0.0147473	0.0443242	-0.0730745	0.380729	-0.128598	0.172744	-0.0774063	0.22231	-0.100569	12
P40925;B9A041;B8ZZ51;C9JF79	MDH1	MDH1	#N/A	#N/A	Malate dehydrogenase, cytoplasmic;Malate dehydrogenase	0.227987	0.112233	0.318809	0.191942	0.118758	-0.0373251	0.0258793	0.0450235	0.222248	0.0818577	22
H3BV07;A0A2R8Y518;H3BNU1;Q9ULP9;A0A0D9SFR5;H3BQ06	TBC1D24	TBC1D24	#N/A	#N/A	TBC1 domain family member 24	0.146916	-0.0378582	0.194591	0.063779	0.249021	-0.0299415	0.164143	-0.0541377	0.222063	0.0176797	15
Q8N8N7;G3V3Y1;G3V2R9	PTGR2	PTGR2	#N/A	#N/A	Prostaglandin reductase 2	0.210139	0.0306892	0.236217	0.268195	0.207643	0.0214797	-0.361009	-0.330846	0.222001	0.150105	13
Q9H977;B9A049	WDR54	WDR54	#N/A	#N/A	WD repeat-containing protein 54	-0.0200332	0.145482	-0.116614	0.548042	0.495593	-0.105194	0.306845	-0.023607	0.221722	0.258085	5
Q13509;A0A0B4J269	TUBB3	TUBB3	Known mitochondrial	#N/A	Tubulin beta-3 chain	0.209141	0.211511	0.169027	0.240986	0.272382	0.00100953	0.0958569	0.0475383	0.22163	0.125982	33
Q641Q2;F8W7U3;A0A087WYF6;E7ESD2	FAM21A	FAM21A	#N/A	#N/A	WASH complex subunit FAM21A	0.0316775	-0.128977	0.306029	0.0447438	0.131589	-0.0821635	-0.0766759	-0.226544	0.221444	-0.0173149	33
O43772;C9JPE1	SLC25A20	SLC25A20	Known mitochondrial	#N/A	Mitochondrial carnitine/acylcarnitine carrier protein	0.177216	0.0302654	0.214747	-0.00763764	0.227618	-0.262486	0.439357	-0.0757176	0.221197	-0.129442	15
Q7L7X3	TAOK1	TAOK1	#N/A	#N/A	Serine/threonine-protein kinase TAO1	0.366028	-0.298407	0.158078	0.0788831	0.281075	-0.0155492	0.0881415	-0.159267	0.220887	0.0324394	18
K7ENL9;Q96DM3;A0A087WZD4	C18orf8	C18orf8	#N/A	#N/A	Uncharacterized protein C18orf8	0.442015	-0.169128	0.173255	-0.147426	0.266996	-0.0338206	0.0556121	-0.168188	0.220887	-0.0895053	5
O00154;K7EKP8	ACOT7	ACOT7	Known mitochondrial	#N/A	Cytosolic acyl coenzyme A thioester hydrolase	0.262193	0.0538064	0.183201	0.0739573	0.257011	-0.0150826	0.191184	0.0720372	0.220578	0.0301242	29
E9PDF2;E9PCR7;Q02218;A0A0D9SFS3;E9PFG7	OGDH	OGDH	Known mitochondrial	#N/A	2-oxoglutarate dehydrogenase, mitochondrial	-0.572694	-0.0144413	0.322044	-0.0848233	0.111432	-0.206512	0.268554	-0.199802	0.220578	-0.144385	47
P84077	ARF1	ARF1	#N/A	#N/A	ADP-ribosylation factor 1	-0.0675608	-0.0494271	0.147307	0.0457225	0.290306	-0.0316069	0.127765	-0.06868	0.220578	0.00757586	18
O95456	PSMG1	PSMG1	#N/A	#N/A	Proteasome assembly chaperone 1	-0.0915099	0.554933	0.605874	0.531369	-0.307216	0.163885	-0.0716638	0.345396	0.220392	0.359296	6
Q9NXG2	THUMPD1	THUMPD1	#N/A	#N/A	THUMP domain-containing protein 1	0.207268	0.0583859	0.267356	0.0942361	0.170822	-0.0263373	0.132511	-0.107866	0.219896	0.0352086	20
Q13813	SPTAN1	SPTAN1	#N/A	#N/A	Spectrin alpha chain, non-erythrocytic 1	0.0825664	-0.0841961	0.234133	-0.0249568	0.205393	-0.0624598	0.278104	0.0462816	0.219835	-0.0435864	256
Q9UHB7	AFF4	AFF4	#N/A	#N/A	AF4/FMR2 family member 4	-0.922347	0.0946415	0.277985	0.09815	0.159242	-0.118633	0.176323	0.0736831	0.219835	-0.00617348	13
E9PL57;F8VSA6;E9PS38	NEDD8-MDP1;NEDD8	NEDD8-MDP1	#N/A	#N/A		0.178492	0.037312	0.263996	0.286999	0.174279	-0.110729	0.0709388	-0.0867831	0.219834	0.101798	8
Q5SSJ5;B0QZK4;X6RGJ2;Q5SWC8	HP1BP3	HP1BP3	#N/A	#N/A	Heterochromatin protein 1-binding protein 3	0.15004	-0.134873	0.254231	-0.0800879	0.184217	-0.0520422	0.392098	-0.0157388	0.219649	-0.0659969	40
Q9UH65;E7EMB1	SWAP70	SWAP70	#N/A	#N/A	Switch-associated protein 70	0.208392	-0.0375768	0.18612	0.0255958	0.251931	0.105946	0.105142	0.0597706	0.219401	0.0663303	27
Q15417;E9PDU6	CNN3	CNN3	#N/A	#N/A	Calponin-3;Calponin	0.132774	0.0753272	0.242206	0.0836559	0.196103	0.0504668	0.176833	0.0157831	0.219339	0.0671568	23
Q9H1E5	TMX4	TMX4	#N/A	#N/A	Thioredoxin-related transmembrane protein 4	-0.284757	-0.0372363	0.288654	0.144308	0.146264	0.202762	0.245009	-0.0654458	0.219215	0.173831	7
Q9BXP2	SLC12A9	SLC12A9	#N/A	#N/A	Solute carrier family 12 member 9	-0.212551	-0.0902192	-0.0170813	-0.155197	0.422018	-0.151314	0.156655	-0.425501	0.21911	-0.153254	9
O43823	AKAP8	AKAP8	#N/A	#N/A	A-kinase anchor protein 8	0.0298416	0.1125	0.35558	0.314755	0.0681893	0.0697021	-0.0269104	0.105142	0.219029	0.197425	17
P82979;F8VZQ9	SARNP	SARNP	#N/A	#N/A	SAP domain-containing ribonucleoprotein	-0.0527753	-0.0619175	0.403704	0.141564	0.00633396	-0.086247	0.131326	0.137635	0.218657	0.0321502	15
O15240	VGF	VGF	#N/A	#N/A	Neurosecretory protein VGF;Neuroendocrine regulatory peptide-1;Neuroendocrine regulatory peptide-2;Antimicrobial peptide VGF[554-577]	-0.47702	-0.305236	0.0692898	-0.302529	0.353662	-0.27638	0.242938	-0.319316	0.218471	-0.289395	53
Q04864	REL	REL	#N/A	#N/A	Proto-oncogene c-Rel	0.297367	0.0688772	0.617863	0.220949	-0.335827	0.0836559			0.218428	0.153935	7
P22307;H0YF61	SCP2	SCP2	Known mitochondrial	Peroxisomedb	Non-specific lipid-transfer protein	0.390888	0.0507454	0.258217	0.0973411	0.176961	0.00762616	0.23952	0.0590784	0.218161	0.0531809	24
E7EVJ5;Q96F07;H7C229;E7EW33	CYFIP2	CYFIP2	#N/A	#N/A	Cytoplasmic FMR1-interacting protein 2	-0.289087	-0.123984	0.0432045	-0.134509	0.373732	0.00187425	0.221073	-0.204782	0.217913	-0.0647062	54
Q9H7L9	SUDS3	SUDS3	#N/A	#N/A	Sin3 histone deacetylase corepressor complex component SDS3	-0.36563	-0.25972	0.218719	-0.0458931	0.21661	0.119688	0.227864	0.0720372	0.217665	0.0392718	12
P62834;A0A075B6Q0	RAP1A	RAP1A	#N/A	#N/A	Ras-related protein Rap-1A	-0.101985	-0.192299	0.194087	-0.093017	0.239642	-0.0250449	0.0852886	-0.0646157	0.217045	-0.0586307	15
B7WPE2;Q32P44;G3V195;G3V1D0;H0Y3M3	EML3	EML3	#N/A	#N/A	Echinoderm microtubule-associated protein-like 3	0.30229	-0.177637	0.0817487	-0.310397	0.340505	-0.0163515	0.275245	-0.242652	0.21692	-0.155896	11
P62312	LSM6	LSM6	#N/A	#N/A	U6 snRNA-associated Sm-like protein LSm6	0.00590291	0.0614305	0.241352	0.101112	0.191942	-0.046042	0.0882773	-0.00395845	0.216858	0.0294105	9
Q15018	FAM175B	FAM175B	#N/A	#N/A	BRISC complex subunit Abro1	0.098689	0.10608	0.314523	-0.146659	0.110764	0.123534	-0.0597655	0.107018	0.216238	-0.00524648	13
Q9UKY7;H0Y8K3	CDV3	CDV3	#N/A	#N/A	Protein CDV3 homolog	0.167229	-0.00478328	0.391438	-0.0213797	0.0159258	-0.241458	-0.0230205	-0.126801	0.215865	-0.127226	10
P23786;A0A1B0GVF3;A0A1B0GV75;A0A1B0GTB8;A0A1B0GWC0	CPT2	CPT2	Known mitochondrial	#N/A	Carnitine O-palmitoyltransferase 2, mitochondrial	-0.318164	-0.00842098	0.217479	0.0464211	0.214125	-0.355959	0.270589	-0.180659	0.215803	-0.140786	32
Q9HBM1	SPC25	SPC25	#N/A	#N/A	Kinetochore protein Spc25	-0.237183	0.293253	0.331017	0.265077	0.0903115	0.42191	-0.713072	0.516015	0.215679	0.345623	7
A2RRP1;H0Y5G7	NBAS	NBAS	#N/A	#N/A	Neuroblastoma-amplified sequence	-0.238698	-0.102233	0.175173	-0.00763764	0.254957	-0.0183812	0.143132	-0.223003	0.215616	-0.0129994	55
K7EMQ3	DNM2	DNM2	#N/A	#N/A		0.285698	0.122474	0.033793	-0.105458	0.377068	-0.158188	0.0234683	-0.246532	0.215616	-0.131582	24
Q13131	PRKAA1	PRKAA1	#N/A	#N/A	5-AMP-activated protein kinase catalytic subunit alpha-1	0.359184	0.135404	0.0881415	-0.0719974	0.332737	0.109561	0.214622	0.00690831	0.215616	0.021636	21
M0R0N4;M0QYZ2;P53680;X6R390;M0QZ21	AP2S1	AP2S1	#N/A	#N/A	AP-2 complex subunit sigma	-0.0831412	-0.10276	0.116631	-0.041625	0.306962	-0.09866	0.297015	-0.180414	0.214933	-0.0698607	7
Q9BR76	CORO1B	CORO1B	#N/A	#N/A	Coronin-1B	0.135009	-0.0423083	0.0392789	-0.14484	0.370945	-0.0875341	0.361881	-0.261898	0.214622	-0.115902	28
H6UMI1;O95166;F5GZY7;Q9H0R8	GABARAP;GABARAPL1	GABARAP	#N/A	#N/A	Gamma-aminobutyric acid receptor-associated protein;Gamma-aminobutyric acid receptor-associated protein-like 1	-0.216971	-0.0871509	0.271545	0.0710762	0.154194	0.239398	0.196733	0.0343565	0.214063	0.157691	3
G3V5T0;A0A0C4DFM0;A0A0A0MR33;G3V4T6;G3V267	GSTZ1	GSTZ1	Known mitochondrial	#N/A		0.126709	0.0380147	0.220701	0.131985	0.207143	0.159242	0.446891	0.0798389	0.213938	0.145678	7
A0A0C4DGQ8;Q6IAN0;J3KRS1	DHRS7B	DHRS7B	Predicted mitochondrial	#N/A	Dehydrogenase/reductase SDR family member 7B	-0.141844	-0.259064	0.265917	0.00403388	0.159371	0.154972	0.260869	0.218719	0.213627	0.081476	9
P00395	MT-CO1	MT-CO1	Known mitochondrial	#N/A	Cytochrome c oxidase subunit 1	0.00647761	-0.0392214	0.229834	-0.0600664	0.196733	-0.389716	0.308128	-0.0873195	0.213378	-0.215496	5
Q96RD7	PANX1	PANX1	#N/A	#N/A	Pannexin-1	-0.0149951	-0.161847	0.0600474	-0.0467273	0.351289	0.0611541	0.361432	0.0708015	0.213005	0.00822155	5
O15085	ARHGEF11	ARHGEF11	#N/A	#N/A	Rho guanine nucleotide exchange factor 11	0.238298	-0.167766	0.134484	-0.340075	0.287118	-0.0644045	0.39846	-0.14468	0.212818	-0.195666	26
Q86Y82;B1AJQ6	STX12	STX12	#N/A	#N/A	Syntaxin-12	-0.0723917	-0.270956	0.154583	-0.11566	0.268674	-0.179221	0.291486	-0.132831	0.212756	-0.14709	13
Q5W111	SPRYD7	SPRYD7	#N/A	#N/A	SPRY domain-containing protein 7	-0.136173	-0.429479	0.0747794	0.257493	0.338453	-0.0245165	0.179766	-0.458921	0.212632	0.123368	8
Q16513	PKN2	PKN2	#N/A	#N/A	Serine/threonine-protein kinase N2	0.198494	0.0963968	0.130008	-0.0377101	0.29066	0.127633	0.192699	-0.119134	0.212569	0.047329	25
Q7LC14;O00221	NFKBIE	NFKBIE	#N/A	#N/A	NF-kappa-B inhibitor epsilon	0.690372	-0.0250889	-0.0331709	0.0831112	0.422018	-0.260809	0.0749164	-0.324943	0.212302	-0.0786247	6
B4DE60;Q9BRK0	REEP2	REEP2	#N/A	#N/A	Receptor expression-enhancing protein;Receptor expression-enhancing protein 2	-0.315792	-0.171693	-0.0108464	-0.316007	0.405012	-0.0352096	0.348912	-0.290868	0.212015	-0.168788	5
Q53T59;F6TR53;B5MC96	HS1BP3	HS1BP3	#N/A	#N/A	HCLS1-binding protein 3	0.649018	0.177471	0	-0.239839	0.396269	-0.108612	0.424922	-0.186311	0.211698	-0.172734	11
P61081	UBE2M	UBE2M	#N/A	#N/A	NEDD8-conjugating enzyme Ubc12	0.369829	0.234379	0.201634	0.0982848	0.221073	-0.00540581	0.0533895	0.00805652	0.211386	0.0473709	13
P30086	PEBP1	PEBP1	#N/A	#N/A	Phosphatidylethanolamine-binding protein 1;Hippocampal cholinergic neurostimulating peptide	0.197236	0.123534	0.311852	0.186247	0.103128	-0.036585	-0.0632585	0.0694271	0.211261	0.0791289	20
Q86TU7;Q6NXR6	SETD3	SETD3	#N/A	#N/A	Histone-lysine N-methyltransferase setd3	0.102591	0.0703893	0.239642	0.262553	0.182311	0.22404	0.0947765	-0.145845	0.211261	0.243425	16
P61088;F8VQQ8;F8VSD4;F8VV71	UBE2N	UBE2N	Predicted mitochondrial	#N/A	Ubiquitin-conjugating enzyme E2 N	0.495695	0.327457	0.349818	0.282973	0.0571383	-0.178469	-0.0258966	0.0251707	0.210888	0.0706229	16
P18754;C9JW69;C9JRH2;C9J3R0;C9JMJ4;C9JQZ4	RCC1	RCC1	#N/A	#N/A	Regulator of chromosome condensation	0.269991	0.00619029	0.253868	0.112767	0.166587	0.104739	0.103665	0.160146	0.210888	0.108759	19
P55957	BID	BID	#N/A	#N/A	BH3-interacting domain death agonist;BH3-interacting domain death agonist p15;BH3-interacting domain death agonist p13;BH3-interacting domain death agonist p11	0.205393	0.113701	0.276318	0.0973411	0.141171	0.0729976	-0.0407491	0.169155	0.210327	0.0852207	10
Q9ULE3;F8WAT8	DENND2A	DENND2A	#N/A	#N/A	DENN domain-containing protein 2A			-0.0457739	-0.238391	0.426748	-0.215094			0.209747	-0.226696	3
A0A0C4DGH0;Q5ZPR3;H0YL10	CD276	CD276	#N/A	#N/A	CD276 antigen	-0.214508	-0.235161	0.22231	0.0950467	0.195852	0.0561673	0.066537	-0.0702998	0.209141	0.075738	11
Q96FJ0;B3KR00	STAMBPL1	STAMBPL1	#N/A	#N/A	AMSH-like protease	0.269991	0.255561	0.0968015	-0.164157	0.313014	-0.0102361	0.215119	0.120352	0.208954	-0.0851447	7
P61764;A0A0D9SG72;A0A1B0GVQ5;A0A1B0GWF2;A0A1B0GTP9;A0A2R8Y5D4;A0A1B0GW76	STXBP1	STXBP1	Predicted mitochondrial	#N/A	Syntaxin-binding protein 1	-0.124755	-0.0626706	0.0163537	-0.104775	0.378734	-0.113707	0.319155	-0.213253	0.208892	-0.109234	43
Q15814	TBCC	TBCC	#N/A	#N/A	Tubulin-specific chaperone C	0.451119	0.113167	0.227248	-0.0362448	0.190172	0.0177795	-0.00132789	0.00647761	0.208829	-0.0089798	15
P11137	MAP2	MAP2	#N/A	#N/A	Microtubule-associated protein 2	0.263034	0.131853	0.16877	0.00647761	0.247442	-0.0172127	0.204016	-0.120247	0.208642	-0.0053189	86
A0A087X271;H3BVI6;B4DDF4;B4DUT8;Q99439;K7ES69	CNN2	CNN2	#N/A	#N/A	Calponin;Calponin-2			-0.719661	-0.243113	0.768841	0.166715			0.208605	-0.0236951	6
O43865	AHCYL1	AHCYL1	#N/A	#N/A	Putative adenosylhomocysteinase 2	-0.136839	-0.248159	0.166201	-0.302244	0.249627	-0.07224	0.00245056	-0.359379	0.208517	-0.182663	22
E9PHM6;F6QMI7	DST	DST	#N/A	#N/A		0.125916	-0.0338058	0.0601858	-0.122287	0.342782	0.0882773	0.204516	-0.0485017	0.208392	-0.0131668	113
Q9NQX3;F5H039	GPHN	GPHN	#N/A	#N/A	Gephyrin;Molybdopterin adenylyltransferase;Molybdopterin molybdenumtransferase	0.318346	0.202261	0.294547	0.258459	0.115433	0.0618453	-0.0567312	0.0107799	0.207768	0.163499	28
Q9BW60	ELOVL1	ELOVL1	#N/A	#N/A	Elongation of very long chain fatty acids protein 1	-0.0860479	-0.267166	0.147828	0.00920381	0.264597	-0.114863	0.0807941	-0.134699	0.207393	-0.0514963	3
P52888;K7EP46	THOP1	THOP1	#N/A	#N/A	Thimet oligopeptidase	0.322044	0.205267	0.277985	0.145612	0.133169	0.0720372	0.116631	0.142609	0.207393	0.109294	40
P50579;F8VRR3;F8VQZ7	METAP2	METAP2	#N/A	#N/A	Methionine aminopeptidase 2	0.358621	0.326882	0.39594	0.43957	-0.00984383	0.0640551	-0.285548	-0.0215554	0.207268	0.263996	19
Q9BX68	HINT2	HINT2	Known mitochondrial	#N/A	Histidine triad nucleotide-binding protein 2, mitochondrial	0.0122111	0.095587	0.182184	0.118094	0.231555	-0.150241	0.480679	-0.0627008	0.207081	-0.00984387	8
O95352	ATG7	ATG7	#N/A	#N/A	Ubiquitin-like modifier-activating enzyme ATG7	0.187134	0.0756011	0.143002	0.104739	0.268434	0.0409626	-0.153559	0.0893625	0.207081	0.0732033	18
C9J1X0;A4D1P6	WDR91	WDR91	#N/A	#N/A	WD repeat-containing protein 91	0.909735	-0.048845	0.600936	-0.234635	-0.336865	-0.17054	-0.107741	0.245496	0.206931	-0.202232	9
P42345	MTOR	MTOR	#N/A	#N/A	Serine/threonine-protein kinase mTOR	0.220206	-0.018498	0.158596	-0.133575	0.253626	0.104337	0.0839282	-0.0662763	0.206893	-0.00972033	86
P53701	HCCS	HCCS	Known mitochondrial	#N/A	Cytochrome c-type heme lyase	-0.0604124	0.0479571	0.525568	0.295605	-0.203037	-0.392819	-0.0523413	-0.0498153	0.206781	-0.00792774	11
Q9UBQ6;C9JEG3	EXTL2	EXTL2	#N/A	#N/A	Exostosin-like 2;Processed exostosin-like 2	-0.618096	-0.0216725	-0.35113	-0.13397	0.607484	0.254836	-0.0421894	0.054779	0.206374	0.0734912	6
P49189	ALDH9A1	ALDH9A1	Known mitochondrial	#N/A	4-trimethylaminobutyraldehyde dehydrogenase	0.193961	0.117828	0.301119	0.140779	0.104873	-0.0146161	0.0943712	-0.106948	0.206331	0.0651725	31
Q9HD42;F8VVT7;F8VUA2;F5H875	CHMP1A	CHMP1A	#N/A	#N/A	Charged multivesicular body protein 1a	0.0190613	0.00403388	-0.00543473	-0.232786	0.390888	0.0287106	0.0460021	-0.294066	0.206293	-0.0961211	10
E9PHI4;O94901	SUN1	SUN1	#N/A	#N/A	SUN domain-containing protein 1	-0.0856345	-0.234007	0.0275787	-0.22164	0.365245	-0.131124	0.13947	-0.187559	0.206268	-0.175672	34
Q9HCE3	ZNF532	ZNF532	#N/A	#N/A	Zinc finger protein 532	0.350837	0.102457	0.435842	1.33171	-0.0681051	0.562768	0.532666	0.548733	0.205762	0.99787	9
Q4V339;A0A0A6YYH9;Q5JTY5;Q5RIA9;Q8IUF1;Q9BRT8;A0A0B4J2F1;A0A087X140;A0A087WWG3;C9J3G2;A0A0A0MRU4;Q5RIB0;H0Y5V3	CBWD6;CBWD5;CBWD3;CBWD2;CBWD1;CBWD7	CBWD6	#N/A	#N/A	COBW domain-containing protein 6;COBW domain-containing protein 3;COBW domain-containing protein 5;COBW domain-containing protein 2;COBW domain-containing protein 1	0.391878	0.271426	0.352194	-0.191491	0.0425042	-0.146771	-0.242772	-0.297271	0.205643	-0.168958	7
A0A0U1RQP1;Q05193;A0A0D9SFE4;A0A0D9SFB1;A0A1B0GU67	DNM1	DNM1	#N/A	#N/A	Dynamin-1	0.0692898	0.0396999	0.0695647	-0.112724	0.329985	-0.0139313	0.221073	-0.222364	0.205643	-0.0624824	62
P09172	DBH	DBH	#N/A	#N/A	Dopamine beta-hydroxylase;Soluble dopamine beta-hydroxylase	-0.371721	-0.0799049	0.00245056	-0.0102361	0.383608	0.041243	0.549226	-0.210079	0.20558	0.0157331	40
E9PFZ1;Q5JPI3	C3orf38	C3orf38	#N/A	#N/A	Uncharacterized protein C3orf38	-0.00239685	0.0900404	0.0057592	0.132116	0.380286	-0.0648118	0.221073	0.160275	0.205142	0.0370097	2
Q8NEY1;A0A0A0MRJ3	NAV1	NAV1	#N/A	#N/A	Neuron navigator 1	-0.724325	-0.363457	0.134878	0.397474	0.269153	-0.0453719	0.18574	0.331705	0.203577	0.192977	8
A0A087WU03	HNRNPDL	HNRNPDL	#N/A	#N/A		0.23842	0.167101	0.353775	0.258217	0.0357646	0.0753272	0.0556121	0.234011	0.203514	0.169668	2
H0YLD0;H0YLY9;Q14442	PIGH	PIGH	#N/A	#N/A	Phosphatidylinositol N-acetylglucosaminyltransferase subunit H			0.263155	-0.342982	0.14104	0.202261	0.0851526	-0.216552	0.203389	-0.0447541	2
O95716	RAB3D	RAB3D	Known mitochondrial	#N/A	Ras-related protein Rab-3D	0.0932897	-0.199106	0.16337	-0.154763	0.242328	-0.135396	0.266037	-0.271339	0.203389	-0.145047	10
H3BMF4;Q9H2V7;H3BR82	SPNS1	SPNS1	Known mitochondrial	#N/A	Protein spinster homolog 1	-0.220127	-0.259202	0.00748262	-0.150337	0.375401	-0.106312	0.205643	-0.218968	0.203138	-0.128156	7
A0A0R4J2F3;P0DPB6			#N/A	#N/A		-0.0451635	-0.21327	0.455755	-0.291486	-0.103767	-0.873529	-0.191623	-0.0962213	0.202951	-0.553352	3
Q15102;M0R1K3;M0R389;M0QZT2	PAFAH1B3	PAFAH1B3	#N/A	#N/A	Platelet-activating factor acetylhydrolase IB subunit gamma	0.265557	0.175557	0.121944	0.0278618	0.279293	0.0643311	0.139208	0.0177795	0.202762	0.0462117	17
Q9BRP8	WIBG	WIBG	#N/A	#N/A	Partner of Y14 and mago	0.0828389	0.0533895	0.397693	0.140648	-0.0229033	-0.0133488	-0.0230499	0.0394191	0.202668	0.0657032	13
O75340;A0A024QZ42	PDCD6	PDCD6	#N/A	#N/A	Programmed cell death protein 6	0.236095	-0.0545121	0.303459	0.111699	0.0939657	-0.0416101	0.109962	0.0174944	0.202512	0.03708	9
Q13885	TUBB2A	TUBB2A	#N/A	#N/A	Tubulin beta-2A chain	0.29443	0.166458	0.121944	0.118758	0.277628	0.0210533	0.0918014	-0.0126354	0.201885	0.0707329	35
Q495W5	FUT11	FUT11	#N/A	#N/A	Alpha-(1,3)-fucosyltransferase 11	-0.813931	-0.83367	0.00633396	-0.126486	0.373954	0.0835197	0.457752	-0.148881	0.201822	-0.0176653	5
Q13889;F5GWD3;H0YFF7;A0A087WYD5;F5GXG6;F5H4K7	GTF2H3	GTF2H3	#N/A	#N/A	General transcription factor IIH subunit 3	0.0993626	-0.185638	0.433173	-0.00895804	-0.0741828	-0.0141353	0.139077	-0.11143	0.201684	-0.0115444	7
P20618	PSMB1	PSMB1	#N/A	#N/A	Proteasome subunit beta type-1	0.263635	0.1121	0.273098	0.0970713	0.125387	-0.0814764	0.0976109	-0.0226981	0.201132	0.0105579	18
Q6NXT1;D3YTC9;B5MCX7;H7C3L3;F8WB76;C9JU48	ANKRD54	ANKRD54	#N/A	#N/A	Ankyrin repeat domain-containing protein 54	0.254473	-0.360138	0.128029	-0.318326	0.270708	0.193583	0.280481	-0.191096	0.201132	-0.0397849	8
A0A0D9SEU5;R4GMX8;Q6VN20	RANBP10	RANBP10	#N/A	#N/A	Ran-binding protein 10	0.103397	0.303693	-0.0358602	0.943134	0.404576	-0.736869	-0.135982	-0.516636	0.201101	0.334992	9
P06730;D6RBW1;H0Y8J7	EIF4E	EIF4E	#N/A	#N/A	Eukaryotic translation initiation factor 4E	0.189034	0.127765	0.397912	0.288536	-0.0272632	-0.0496361	-0.0815832	0.102591	0.200931	0.129336	12
A0A494C1G8;A0A494C0Z6;H0Y6K5;A0A494C070;H0Y7L6;Q02447	SP3	SP3	#N/A	#N/A	Transcription factor Sp3	-0.168739	-0.150577	0.129876	-0.0980268	0.268434	0.284633	0.00475299	0.0507454	0.200818	0.105953	4
Q99829;B0QZ18;F2Z2V0;A6PVH9;E7ENH5;Q5JX44;Q5JX58;Q5JX59;Q5JX60;Q5JX45;Q5JX56;Q5JX52;Q5JX61;Q5JX55	CPNE1	CPNE1	#N/A	#N/A	Copine-1	0.202637	0.0250289	0.0496307	-0.140682	0.336969	-0.120624	0.0720372	-0.291398	0.200442	-0.130618	24
P28066	PSMA5	PSMA5	#N/A	#N/A	Proteasome subunit alpha type-5	0.0970713	0.052555	0.234869	0.0140695	0.164915	-0.0346775	0.140517	-0.0544223	0.200316	-0.0100981	15
P40616;B4DZG7;F8VYN9	ARL1	ARL1	#N/A	#N/A	ADP-ribosylation factor-like protein 1	0.0394191	0.0432045	0.144046	-0.130508	0.253989	-0.00168891	0.20364	-0.185392	0.200065	-0.0646609	11
Q17RN3	FAM98C	FAM98C	#N/A	#N/A	Protein FAM98C			-0.202871	-0.463231	0.514501	-0.156386	0.133958	-0.374898	0.199952	-0.301666	5
F5H1N7;Q6ZU35	KIAA1211	KIAA1211	#N/A	#N/A	Uncharacterized protein KIAA1211	0.064469	-0.0560412	0.31904	-0.0687406	0.0701146	0.0368901	-0.0441368	-0.0309435	0.199939	-0.0149587	37
Q8TCC3	MRPL30	MRPL30	Known mitochondrial	#N/A	39S ribosomal protein L30, mitochondrial	-0.752631	-0.122428	-0.197583	-0.238953	0.511164	-0.221674	-0.0515486	-0.107213	0.199883	-0.230287	7
B7Z7F3;Q9H6Z4	RANBP3	RANBP3	#N/A	#N/A	Ran-binding protein 3	0.271306	0.153416	0.336398	0.229588	0.0489336	0.0287106	0.00532815	0.250355	0.199814	0.132643	15
Q9UJ70;C9JEV6;H7C3G9;H7C286;H0YEB7	NAGK	NAGK	#N/A	#N/A	N-acetyl-D-glucosamine kinase	0.364572	0.252052	0.269512	0.159113	0.126048	0.0157831	0.165687	0.128161	0.199562	0.089227	12
Q7Z2T5	TRMT1L	TRMT1L	#N/A	#N/A	TRMT1-like protein	0.0558898	-0.015068	0.180912	-0.023475	0.217355	0.137635	0.259664	0.0104934	0.199248	0.0593276	31
Q9UKG1	APPL1	APPL1	#N/A	#N/A	DCC-interacting protein 13-alpha	0.266517	0.0694271	0.179001	-0.0327133	0.219215	0.095587	0.102994	0.038998	0.199248	0.0328626	35
O00273	DFFA	DFFA	#N/A	#N/A	DNA fragmentation factor subunit alpha	0.14274	-0.0126792	0.123799	-0.120859	0.270947	-0.11652	0.138945	-0.218078	0.199248	-0.118688	25
Q9H490	PIGU	PIGU	#N/A	#N/A	Phosphatidylinositol glycan anchor biosynthesis class U protein	-0.144855	0.0263043	0.230203	0.0312541	0.166073	-0.113364	-0.0117625	-0.229907	0.198494	-0.0392436	7
P00558	PGK1	PGK1	Known mitochondrial	#N/A	Phosphoglycerate kinase 1	0.170438	0.0749164	0.217231	0.0508847	0.178109	-0.0360968	0.000432815	-0.0519674	0.197803	0.00804938	50
O43324;D6RBD7;C9J1V9;H0YAL7	EEF1E1;EEF1E1-BLOC1S5	EEF1E1	#N/A	#N/A	Eukaryotic translation elongation factor 1 epsilon-1	0.255561	-0.00219453	0.193204	-0.0718155	0.202386	0.042084	0.0943712	0.0136409	0.197803	-0.013742	13
O60262;K7ESC6	GNG7	GNG7	#N/A	#N/A	Guanine nucleotide-binding protein G(I)/G(S)/G(O) subunit gamma-7;Guanine nucleotide-binding protein subunit gamma	-0.0432593	-0.118805	0.0319598	-0.236452	0.346078	-0.240844	0.22132	-0.456623	0.197551	-0.238647	3
P55072	VCP	VCP	#N/A	#N/A	Transitional endoplasmic reticulum ATPase	0.111966	0.00388999	0.199876	0.040682	0.194844	-0.0198723	0.1503	-0.00194893	0.197362	0.0107226	74
Q9P291	ARMCX1	ARMCX1	Predicted mitochondrial	#N/A	Armadillo repeat-containing X-linked protein 1	-0.302173	-0.0254413	0.234624	-0.277149	0.158725	0.0140695	0.793355	0.0669503	0.197173	-0.124204	8
Q9GZQ3;H0YEQ6;E9PJE4	COMMD5	COMMD5	#N/A	#N/A	COMM domain-containing protein 5	0.44297	0.0112093	0.028852	-0.0376509	0.347552	-0.0829273	0.054779	-0.118962	0.196985	-0.0601115	7
O43181	NDUFS4	NDUFS4	Known mitochondrial	#N/A	NADH dehydrogenase [ubiquinone] iron-sulfur protein 4, mitochondrial	-0.929583	-0.0701484	0.266757	-0.523795	0.123401	-0.286744	0.127237	-0.164609	0.196859	-0.400406	7
O15211	RGL2	RGL2	#N/A	#N/A	Ral guanine nucleotide dissociation stimulator-like 2	-0.102094	0.0447438	-0.0343672	-0.0955891	0.395611	-0.143245	0.443819	-0.0341898	0.196582	-0.11922	9
P22694;A0A0A0MS54;A0A087WVC4;B1APG2;B1APF8;B1APF9;B1APG3;B1APG1;B1APG0;B1APF7	PRKACB	PRKACB	#N/A	#N/A	cAMP-dependent protein kinase catalytic subunit beta	0.102457	-0.0977643	0.124196	-0.00623147	0.265077	-0.140635	0.181293	-0.0393845	0.196355	-0.0718685	24
Q9UGM6	WARS2	WARS2	Known mitochondrial	#N/A	Tryptophan--tRNA ligase, mitochondrial	-0.215479	0.150949	-0.0234603	0.234747	0.387032	0.286999	0.121148	0.0901759	0.196336	0.26111	5
Q9Y2Q5	LAMTOR2	LAMTOR2	#N/A	#N/A	Ragulator complex protein LAMTOR2	0.0231843	0.0618453	0.25544	0.0626743	0.134352	-0.117772	0.225645	-0.119322	0.196166	-0.0247294	8
O15118;K7EQ23	NPC1	NPC1	#N/A	#N/A	Niemann-Pick C1 protein	0.0554733	-0.0608185	0.145482	0.0206267	0.245009	-0.0801794	0.218223	-0.229349	0.196103	-0.0288961	8
O95372;Q5QPQ1;Q5QPQ3;Q5QPQ2	LYPLA2	LYPLA2	#N/A	#N/A	Acyl-protein thioesterase 2	0.436695	0.366364	0.253747	0.0603242	0.135535	-0.0859867	0.119954	0.0370308	0.195851	-0.0109773	16
P50570	DNM2	DNM2	#N/A	#N/A	Dynamin-2	0.272859	0.0728604	0.12075	-0.0260729	0.266637	-0.0178552	0.190678	-0.065325	0.195537	-0.0219582	56
A0A0A0MR88;A0A096LPC5;Q9Y4E1;J3KP36	FAM21C	FAM21C	#N/A	#N/A	WASH complex subunit FAM21C	0.162339	-0.0709362	0.238175	-0.139029	0.15082	-0.00121239	0.219835	-0.022068	0.195159	-0.0684758	34
O43598;H0Y8X4	DNPH1	DNPH1	#N/A	#N/A	2-deoxynucleoside 5-phosphate N-hydrolase 1	0.101784	0.0507454	0.31371	0.0837921	0.0657101	-0.143803	-0.0698455	-0.0942948	0.195033	-0.025522	10
Q96QK1	VPS35	VPS35	#N/A	#N/A	Vacuolar protein sorting-associated protein 35	0.0606008	0.0411028	0.0775164	-0.0304866	0.303459	0.00417777	0.20063	-0.101892	0.194907	-0.0130503	50
Q32MZ4	LRRFIP1	LRRFIP1	#N/A	#N/A	Leucine-rich repeat flightless-interacting protein 1	0.322851	-0.103519	0.28404	0.0611541	0.0997664	-0.0696487	0.162597	0.0968015	0.194843	-0.00276538	18
Q8WWI5	SLC44A1	SLC44A1	Known mitochondrial	#N/A	Choline transporter-like protein 1	-0.229839	-0.277569	0.139862	0.199625	0.246226	-0.113099	0.178237	-0.239174	0.194024	0.0517201	6
Q13618	CUL3	CUL3	#N/A	#N/A	Cullin-3	0.21176	0.0265876	0.214374	0.0745054	0.173128	-0.0142519	0.0210533	-0.0615862	0.193898	0.0308092	41
O94905;E5RHW4	ERLIN2	ERLIN2	#N/A	#N/A	Erlin-2	0.111833	-0.105613	0.130008	-0.0441665	0.254715	-0.0367922	0.152897	-0.14626	0.193709	-0.0404746	21
G3V1U5;Q9Y3E0;F5H6U7	GOLT1B	GOLT1B	#N/A	#N/A	Vesicle transport protein GOT1B	0.442333	0.190299	0.0640551	0.0590784	0.312549	0.0652966	0.239765	-0.0597355	0.193646	0.0621909	2
Q9H4G4;Q5VZR0	GLIPR2	GLIPR2	#N/A	#N/A	Golgi-associated plant pathogenesis-related protein 1	-0.30602	-0.213487	0.0600474	0.0167816	0.315334	-0.291945	0.463832	-0.460707	0.19333	-0.129339	6
G3XAG1;Q96ME7	ZNF512	ZNF512	#N/A	#N/A	Zinc finger protein 512	-0.023607	-0.217122	0.0915306	-0.292034	0.288418	-0.11516	0.431463	-0.0890832	0.19333	-0.200888	30
H0YNH8;Q9BZF9;F5H2B9	UACA	UACA	#N/A	#N/A	Uveal autoantigen with coiled-coil domains and ankyrin repeats	0.624148	0.846714	0.562377	-0.1778	-0.303828	-0.0789599			0.19333	-0.127534	9
Q8WUF8;E9PBM2	FAM172A	FAM172A	#N/A	#N/A	Protein FAM172A	0.121413	-0.0883928	-0.0701484	-0.149665	0.415434	0.275007	0.286645	0.0204844	0.192977	0.0782409	10
Q9BTV5;M0R366	FSD1	FSD1	#N/A	#N/A	Fibronectin type III and SPRY domain-containing protein 1	0.156526	0.126973	0.0976109	-0.0901117	0.282025	-0.00316296	0.141956	-0.0560111	0.192762	-0.0459824	28
P62699	YPEL5	YPEL5	#N/A	#N/A	Protein yippee-like 5	0.032524	-0.0190242	0.200002	-0.132515	0.185232	0.0404014	-0.0459973	-0.172425	0.192636	-0.0434675	4
B3KSI3;O15382;M0QXF9;M0QZ10;M0QZP4	BCAT2	BCAT2	Known mitochondrial	#N/A	Branched-chain-amino-acid aminotransferase;Branched-chain-amino-acid aminotransferase, mitochondrial	0.00331442	-0.0173587	0.205017	-0.105396	0.180021	-0.232413	0.430178	-0.219035	0.192573	-0.167507	15
P46108	CRK	CRK	#N/A	#N/A	Adapter molecule crk	0.198494	-0.016585	0.145482	0.0184917	0.237441	-0.000721562	0.0514416	-0.117944	0.192194	0.00891707	20
Q8N1G2	CMTR1	CMTR1	#N/A	#N/A	Cap-specific mRNA (nucleoside-2-O-)-methyltransferase 1	0.331705	0.246955	0.210763	-0.0242965	0.172744	0.0775164	-0.00351005	0.0760118	0.191878	0.0275079	30
Q9NRY6;I3L161;I3L3X5;I3NI29	PLSCR3;TMEM256-PLSCR3	PLSCR3	#N/A	#N/A	Phospholipid scramblase 3	-0.107182	0.379843	0.0583859	0.282855	0.314058	-0.0423677	0.203514	-0.168058	0.191878	0.129388	4
Q9HCN8	SDF2L1	SDF2L1	#N/A	#N/A	Stromal cell-derived factor 2-like protein 1	0.0486547	-0.0347957	0.0270125	0.0807941	0.339707	0.0196308	0.0918014	-0.176251	0.191815	0.0505365	9
Q8IYS1	PM20D2	PM20D2	#N/A	#N/A	Peptidase M20 domain-containing protein 2	0.229834	0.289598	0.330444	0.044464	0.0384361	0.0837921	0.0398403	0.10165	0.191815	0.064262	12
Q9UFW8;C9JUJ0	CGGBP1	CGGBP1	#N/A	#N/A	CGG triplet repeat-binding protein 1	0.0207689	-0.090634	0.215989	-0.00384265	0.167229	0.291839	0.232783	0.332622	0.191815	0.15156	10
Q16401	PSMD5	PSMD5	#N/A	#N/A	26S proteasome non-ATPase regulatory subunit 5	0.376179	0.0326651	0.101919	-0.11738	0.276437	-0.0627008	0.183201	-0.0567163	0.191815	-0.0897816	25
Q8TBX8	PIP4K2C	PIP4K2C	#N/A	#N/A	Phosphatidylinositol 5-phosphate 4-kinase type-2 gamma	0.364685	-0.0605929	0.0282862	-0.0252505	0.338453	-0.00222347	0.182947	-0.179025	0.191689	-0.013691	21
O00115;K7ENE5	DNASE2	DNASE2	#N/A	#N/A	Deoxyribonuclease-2-alpha	-0.175566	-0.0537183	0.120883	-0.474392	0.25882	-0.109701	0.100843	-0.280422	0.191499	-0.280554	7
O75935;X6RCK5;X6RLR1;X6RA56;A0A0A0MRV8	DCTN3	DCTN3	#N/A	#N/A	Dynactin subunit 3	0.0724488	0.0694271	0.176706	-0.000764838	0.206018	-0.154474	0.131063	-0.0814611	0.191436	-0.0755732	14
Q99497;K7ELW0;K7EN27	PARK7	PARK7	Known mitochondrial	#N/A	Protein deglycase DJ-1	0.155361	0.0194884	0.245009	0.063641	0.135535	-0.0101489	0.0104934	-0.0058548	0.19131	0.0272178	30
Q9Y2W2	WBP11	WBP11	#N/A	#N/A	WW domain-binding protein 11	0.0913952	-0.00575336	0.409472	0.14978	-0.065944	-0.0765693	0.0786098	0.163499	0.191259	0.0410397	25
Q05655	PRKCD	PRKCD	#N/A	#N/A	Protein kinase C delta type;Protein kinase C delta type regulatory subunit;Protein kinase C delta type catalytic subunit			-0.234516	-0.211866	0.519542	-0.176854	0.0439044	-0.458148	0.191228	-0.194254	12
Q9H9G7	AGO3	AGO3	#N/A	#N/A	Protein argonaute-3	0.68419	0.087327	0.265557	0.157949	0.111165	0.0483758	0.450697	-0.104759	0.190425	0.104202	22
Q9UI08;H0YJN0	EVL	EVL	#N/A	#N/A	Ena/VASP-like protein	-0.295163	0.125916	0.337768	0.319271	0.026021	-0.366392	0.262313	-0.0946337	0.190299	0.0167958	10
O00116;A0A1B0GWA2;A0A2R8YEL0	AGPS	AGPS	#N/A	Peroxisomedb	Alkyldihydroxyacetonephosphate synthase, peroxisomal	0.250962	-0.0848845	0.205518	0.100709	0.174918	0.105812	0.245617	0.0871912	0.190299	0.103263	36
P62873;F6UT28;B1AKQ8	GNB1	GNB1	Predicted mitochondrial	#N/A	Guanine nucleotide-binding protein G(I)/G(S)/G(T) subunit beta-1	-0.161185	-0.095096	0.0323829	-0.0747753	0.332507	-0.125903	0.211884	-0.211882	0.190236	-0.100113	20
Q9Y243	AKT3	AKT3	#N/A	#N/A	RAC-gamma serine/threonine-protein kinase	0.0930192	0.0458623	0.0831112	-0.0587284	0.289716	-0.0356679	0.26135	-0.170735	0.190109	-0.0471521	22
Q8NB49;A0A067XG54	ATP11C	ATP11C	#N/A	#N/A	Phospholipid-transporting ATPase IG;Phospholipid-transporting ATPase	-0.246669	-0.31563	0.31904	0.545178	0.0476779	0.15004	-0.253567	-0.15327	0.18973	0.361095	12
Q8TBA6	GOLGA5	GOLGA5	#N/A	#N/A	Golgin subfamily A member 5	0.663755	0.320773	0.258217	0.200002	0.117695	0.167486	-0.398094	-0.289228	0.189666	0.183836	15
Q9NYR9;K7ERG2;H7BXP1	NKIRAS2	NKIRAS2	#N/A	#N/A	NF-kappa-B inhibitor-interacting Ras-like protein 2	-0.300715	-0.0788988	0.14496	-0.0355201	0.231924	0.00345838	0.0669503	-0.236215	0.189097	-0.0158992	5
O95758	PTBP3	PTBP3	#N/A	#N/A	Polypyrimidine tract-binding protein 3	0.45038	0.205768	0.161565	-0.167442	0.214995	0.116897	0.337882	0.0911243	0.188527	-0.0182788	21
Q7L5Y9;B4DVN3;E7ESC7;B4DQT1;D6RE80;D6REW7	MAEA	MAEA	#N/A	#N/A	Macrophage erythroblast attacher	-0.116066	0.166972	-0.0955274	-0.368532	0.425674	0.0480967	0.272262	0.0882773	0.188483	-0.14523	13
Q9H0U4;E9PLD0	RAB1B	RAB1B	Predicted mitochondrial	#N/A	Ras-related protein Rab-1B	0.160146	0.0419438	0.153027	0.0219061	0.222928	0.0265876	0.227495	0.0140695	0.188401	0.0242488	21
P68371	TUBB4B	TUBB4B	#N/A	#N/A	Tubulin beta-4B chain	0.256648	0.120883	0.147828	0.120352	0.227618	0.0408223	0.0554733	0.0207689	0.188274	0.0811351	34
Q9UJW0	DCTN4	DCTN4	#N/A	#N/A	Dynactin subunit 4	-0.00594166	0.115433	0.1141	-0.0171396	0.25882	-0.148497	0.154583	-0.179858	0.188274	-0.0813237	27
P08758;D6RBL5;D6RBE9;E9PHT9	ANXA5	ANXA5	#N/A	#N/A	Annexin A5;Annexin	0.0980152	0.0371714	0.141825	0.0832474	0.232661	0.0271541	0.0829751	-0.0140188	0.187958	0.0554733	33
Q15067	ACOX1	ACOX1	#N/A	Peroxisomedb	Peroxisomal acyl-coenzyme A oxidase 1	0.411969	0.00848693	0.231801	0.0783365	0.14104	0.00791302	0.25181	0.0436244	0.187134	0.0435544	34
Q9H0F7;C9IZ13;A0A0J9YXT0	ARL6	ARL6	#N/A	#N/A	ADP-ribosylation factor-like protein 6	0.220701	0.0517201	0.119024	-0.0640575	0.252173	0.0820213	0.422018	0.161952	0.187134	0.01083	6
P25788;G3V4X5	PSMA3	PSMA3	#N/A	#N/A	Proteasome subunit alpha type-3	0.18409	0.0543624	0.256528	0.0394191	0.113834	-0.0504426	0.1644	-0.00456613	0.186944	-0.00481222	20
Q7Z6I8;H0YAE0	C5orf24	C5orf24	#N/A	#N/A	UPF0461 protein C5orf24	-0.0789141	-0.259116	0.337197	0.27274	0.0187766	-0.226594	0.30229	0.0604624	0.186754	0.044569	8
O75054	IGSF3	IGSF3	#N/A	#N/A	Immunoglobulin superfamily member 3	-0.17262	-0.354464	0.140124	-0.295482	0.23131	-0.435651	0.256648	-0.684179	0.186437	-0.363865	36
A0A087X256;Q2M389	KIAA1033	KIAA1033	#N/A	#N/A	WASH complex subunit 7	0.137766	-0.0989536	0.147307	-0.0502037	0.224534	-0.0630926	0.0354831	-0.0802862	0.186437	-0.0566337	42
P48637;A0A2R8Y430;A0A2R8Y5T7	GSS	GSS	#N/A	#N/A	Glutathione synthetase	0.238298	-0.0273221	0.256407	0.11023	0.112633	0.00748262	0.0326651	0.00115371	0.18631	0.0597706	29
Q9UNH7;A0A0A0MRI2	SNX6	SNX6	#N/A	#N/A	Sorting nexin-6;Sorting nexin-6, N-terminally processed	0.193709	0.0549179	0.169027	-0.0304719	0.203139	0.0402613	0.184852	0.032524	0.186184	0.00532815	27
Q14203	DCTN1	DCTN1	#N/A	#N/A	Dynactin subunit 1	0.0982848	0.0465608	0.121148	-0.0188341	0.248292	-0.0676062	0.138683	-0.0566262	0.18612	-0.0430141	86
Q8N1G4	LRRC47	LRRC47	#N/A	#N/A	Leucine-rich repeat-containing protein 47	0.267955	0.037593	0.257614	-0.0311056	0.11063	-0.0308403	0.0867838	-0.0188196	0.185993	-0.0309729	39
Q9GZN7;K7EPN1;K7EPS3;K7EMJ5;K7EJ96;K7ERP1	ROGDI	ROGDI	#N/A	#N/A	Protein rogdi homolog			-0.162444	-0.0658685	0.465504	0.108759	0.510152	0.703189	0.185429	0.0240856	4
Q99598;C4P0D6;C4P0D8;Q5VVQ1	TSNAX;DISC1	TSNAX	#N/A	#N/A	Translin-associated protein X	0.315102	0.213254	0.355242	0.342327	-0.00739111	0.0652966	-0.0538531	0.0843364	0.185289	0.210451	18
P62330	ARF6	ARF6	#N/A	#N/A	ADP-ribosylation factor 6	-0.000432859	-0.318686	0.0482362	-0.119824	0.31034	0.0913952	0.288418	0.0278618	0.185232	-0.0103523	9
Q7LBR1	CHMP1B	CHMP1B	#N/A	#N/A	Charged multivesicular body protein 1b	-0.202439	0.0635029	0.0901759	0.0126402	0.274292	-0.0222878	-0.0522665	-0.252398	0.185169	-0.0047181	5
O15226	NKRF	NKRF	#N/A	#N/A	NF-kappa-B-repressing factor	-0.0870436	0.0353423	0.368489	0.337882	-0.0252798	0.0821575	-0.088899	0.0281448	0.184998	0.215679	31
D6R938;Q13557;E9PBG7;E9PF82	CAMK2D	CAMK2D	#N/A	#N/A	Calcium/calmodulin-dependent protein kinase type II subunit delta	0.291132	0.2587	0.0568609	0.0194884	0.302641	0.111165	0.174918	-0.0107011	0.184978	0.0660548	15
Q9UMN6	KMT2B	KMT2B	#N/A	#N/A	Histone-lysine N-methyltransferase 2B			0.615416	1.48001	-0.431481	-0.429071	0.00949053	-0.195352	0.184915	0.820583	7
O43237	DYNC1LI2	DYNC1LI2	#N/A	#N/A	Cytoplasmic dynein 1 light intermediate chain 2	0.0404014	0.0611541	-0.00707212	-0.0474428	0.354001	0.00762616	0.132116	-0.135095	0.184731	-0.0196456	35
Q3MHD2;K7ELG9	LSM12	LSM12	#N/A	#N/A	Protein LSM12 homolog	0.287709	0.103128	0.246712	0.235114	0.119954	-0.0393104	0.118758	0.0132121	0.184725	0.104417	7
D6RDV0;D6RA37;D6RIY7;Q13454;A0A0A0MTC2	TUSC3	TUSC3	Predicted mitochondrial	#N/A	Tumor suppressor candidate 3	-0.673026	-0.000692654	0.112767	0.237931	0.253142	0.102725	0.0294175	-0.00692712	0.184661	0.171911	6
Q96IJ6;A0A087WUI8;C9JAH0;F8WD54	GMPPA	GMPPA	#N/A	#N/A	Mannose-1-phosphate guanyltransferase alpha	0.0655723	-0.089559	0.161307	0.278223	0.207518	-0.212601	-0.151026	-0.312438	0.184598	0.0535841	12
Q5QPM7;Q92530;Q5QPM9	PSMF1	PSMF1	#N/A	#N/A	Proteasome inhibitor PI31 subunit	0.182438	0.205643	0.339023	0.331361	0.0113525	0.0130691	0.0437644	-0.0287931	0.184471	0.180975	7
A0A2U3TZM4;A0A2U3TZN6;O14936;A0A2R8YEK3;A0A2R8YE77;A0A2U3TZM1;A0A2R8YFN5;A0A2R8Y6F8;Q5JS74;A0A2R8Y3B3	CASK	CASK	#N/A	#N/A	Peripheral plasma membrane protein CASK	-0.10493	-0.0909258	0.149259	0.101112	0.218595	-0.135111	0.0182068	0.066537	0.184344	-0.0121698	32
Q14353;A0A1W2PR36	GAMT	GAMT	#N/A	#N/A	Guanidinoacetate N-methyltransferase	0.409147	0.154454	0.201885	0.0935602	0.165815	-0.0911564	0.154065	0.00805652	0.183963	0.0041562	11
Q9H9Q2;J3KQ34;J3KQ41;A0A087X1P5;J3QT95;J3QT73	COPS7B	COPS7B	#N/A	#N/A	COP9 signalosome complex subunit 7b	0.144568	0.104471	0.132643	0.143132	0.23352	0.0246034	0.109294	-0.00307618	0.183963	0.0850847	14
Q8N684;F5H669;F5H6M0;F5H047;J3QT54	CPSF7	CPSF7	#N/A	#N/A	Cleavage and polyadenylation specificity factor subunit 7	0.118758	-0.00432013	0.309875	0.118626	0.0450235	0.0199154	0.190172	0.169284	0.183518	0.0701146	21
O75151	PHF2	PHF2	#N/A	#N/A	Lysine-specific demethylase PHF2	0.188654	0.280244	0.153805	-0.0100618	0.212632	0.0503276	0.00273846	-0.0428729	0.183518	0.0204489	7
A0A1B0GV98;A0A1B0GTC5;A0A1B0GU26;A0A1B0GTC3;A0A1B0GVH5;Q9C0B1;A0A1B0GUC3;A0A1B0GTY1	FTO	FTO	#N/A	#N/A	Alpha-ketoglutarate-dependent dioxygenase FTO	0.183709	0.134747	0.207518	0.119157	0.158854	0.0542234	0.024887	-0.0307372	0.183391	0.0870554	36
P78537;G8JLQ3	BLOC1S1	BLOC1S1	Known mitochondrial	#N/A	Biogenesis of lysosome-related organelles complex 1 subunit 1	0.0363276	0.141171	0.178746	-0.0821635	0.187768	-0.37372	0.0503276	0.0219061	0.183264	-0.220589	5
Q9NQ88;A0A0U1RQD1	TIGAR	TIGAR	#N/A	#N/A	Fructose-2,6-bisphosphatase TIGAR	0.180021	0.0738202	-0.0541826	-0.00278709	0.38637	-0.0232111	0.136323	-0.11466	0.182845	-0.012963	12
P60059	SEC61G	SEC61G	#N/A	#N/A	Protein transport protein Sec61 subunit gamma	-0.0345445	-0.114551	0.157561	-0.00884192	0.207643	-0.15157	0.0299829	-0.168642	0.182819	-0.0784418	3
Q9BRR6;H3BRS6	ADPGK	ADPGK	#N/A	#N/A	ADP-dependent glucokinase	-0.0606832	0.00158601	0.0965318	0.105008	0.264236	0.0247452	0.221939	0.0282862	0.182819	0.0654345	13
Q6ZWT7	MBOAT2	MBOAT2	#N/A	#N/A	Lysophospholipid acyltransferase 2	0.0951818	0.135535	-0.0578121	-0.2124	0.388796	0.0540844	0.140779	-0.186393	0.182705	-0.0730138	9
Q9UNW9	NOVA2	NOVA2	#N/A	#N/A	RNA-binding protein Nova-2	0.0201999	0.0113525	-0.0416547	-0.119401	0.376179	-0.0304866	0.346531	0.00173014	0.182336	-0.0742588	18
Q2M2I8;E9PG46	AAK1	AAK1	#N/A	#N/A	AP2-associated protein kinase 1	0.192825	-0.0504277	0.0318186	-0.0723159	0.318577	-0.00385713	0.251325	-0.0398294	0.182311	-0.0376805	19
P22695;H3BRG4;H3BSJ9;H3BP04	UQCRC2	UQCRC2	Known mitochondrial	#N/A	Cytochrome b-c1 complex subunit 2, mitochondrial	-0.141685	-0.0285282	0.044464	-0.159782	0.308011	-0.0873654	0.420078	-0.046042	0.182247	-0.12312	29
Q92932;E7EM83	PTPRN2	PTPRN2	#N/A	#N/A	Receptor-type tyrosine-protein phosphatase N2;Protein-tyrosine-phosphatase	-0.717928	-0.142322	-0.411694	-0.139395	0.601697	-0.295889	0.691087	-0.527242	0.182209	-0.215521	15
Q9C005	DPY30	DPY30	#N/A	#N/A	Protein dpy-30 homolog	-0.0946954	0.0330882	0.265677	0.121679	0.093425	0.0153548	0.0716254	-0.00392947	0.18212	0.069496	8
Q9NZ32;V9GYX7	ACTR10	ACTR10	#N/A	#N/A	Actin-related protein 10	0.0429245	0.0797024	0.0221902	0.0216219	0.326077	-0.0241937	0.142479	-0.0796	0.18212	-0.00110408	24
P42336;A0A2R8Y2F6	PIK3CA	PIK3CA	#N/A	#N/A	Phosphatidylinositol 4,5-bisphosphate 3-kinase catalytic subunit alpha isoform	0.543694	0.237319	0.111566	0.384934	0.249021	0.608431	0.112633	0.499578	0.181929	0.501006	14
P53992;G5EA31	SEC24C	SEC24C	#N/A	#N/A	Protein transport protein Sec24C	0.226755	-0.00326422	0.0949116	-0.0827286	0.263996	-0.0325953	0.135141	-0.0728773	0.181929	-0.0574442	44
P49720;A0A087WUL2;A0A087WXQ8;A0A087WY10	PSMB3	PSMB3	Predicted mitochondrial	#N/A	Proteasome subunit beta type-3	0.334339	0.180275	0.31603	0.135404	0.0335111	-0.0762043	0.0657101	-0.0978107	0.181675	0.0334759	13
Q8WW12	PCNP	PCNP	#N/A	#N/A	PEST proteolytic signal-containing nuclear protein	0.0388575	-0.0209405	0.173511	-0.023827	0.189287	0.0340749	-0.129087	0.153805	0.181421	0.00541438	15
P30044	PRDX5	PRDX5	Known mitochondrial	Peroxisomedb	Peroxiredoxin-5, mitochondrial	0.0703893	0.0112093	0.141956	-0.0337763	0.219587	-0.170654	0.264837	-0.0865993	0.181293	-0.100592	16
Q9NP79;A0A087WY55;Q5TGM0	VTA1	VTA1	#N/A	#N/A	Vacuolar protein sorting-associated protein VTA1 homolog	0.300299	0.172487	0.108892	0.0278618	0.250113	0.0394191	0.174151	0.0487942	0.18123	0.033652	13
O00479	HMGN4	HMGN4	#N/A	#N/A	High mobility group nucleosome-binding domain-containing protein 4	0.0851526	-0.0327429	0.0411028	-0.189368	0.308244	0.0057592	0.281906	-0.0947877	0.180848	-0.0885078	9
K7EMC9;Q969T9;A6NG10;K7ENL2;K7EIJ0	WBP2	WBP2	#N/A	#N/A	WW domain-binding protein 2	-0.0875034	0.0184917	0.127501	-0.0163223	0.231924	-0.0354018	0.20989	-0.0152721	0.180657	-0.0258305	13
Q9Y490	TLN1	TLN1	#N/A	#N/A	Talin-1	0.194213	0.0564447	0.217479	-0.0166141	0.142348	-0.0343376	0.0654344	-0.0277632	0.180403	-0.0254487	175
Q9P253	VPS18	VPS18	#N/A	#N/A	Vacuolar protein sorting-associated protein 18 homolog	0.392427	0.0760118	0.0897694	-0.0763563	0.265437	0.063641	0.0827026	0.0129261	0.180275	-0.00466021	30
O60583;F8WDY7;F2Z2C9	CCNT2	CCNT2	#N/A	#N/A	Cyclin-T2	-0.0723159	-0.172051	0.140517	-0.34628	0.218843	-0.352381	0.683202	0.0604624	0.180212	-0.349327	8
Q9HB90;Q9NQL2	RRAGC;RRAGD	RRAGC	#N/A	#N/A	Ras-related GTP-binding protein C;Ras-related GTP-binding protein D	0.144177	0.203139	-0.000923584	-0.214826	0.340961	0.0982848	0.277866	-0.0430215	0.180122	-0.0497929	12
Q92889	ERCC4	ERCC4	#N/A	#N/A	DNA repair endonuclease XPF	0.139993	0.0441843	0.14978	-0.0866758	0.209765	0.238787	0.406863	0.0597706	0.180084	0.0852139	14
Q92733	PRCC	PRCC	#N/A	#N/A	Proline-rich protein PRCC	0.331476	-0.0564612	0.305912	0.0706641	0.042084	0.0629506	0.24062	0.142871	0.180021	0.0668125	11
Q9H479	FN3K	FN3K	#N/A	#N/A	Fructosamine-3-kinase	0.0600474	-0.0624447	0.0321009	-0.03851	0.313942	-0.125478	0.160146	-0.256149	0.179893	-0.081339	11
Q9H4Z3	PCIF1	PCIF1	#N/A	#N/A	Phosphorylated CTD-interacting factor 1	0.0928839	-0.0563562	-0.0659893	-0.300448	0.388796	-0.0220534	0.156397	-0.248468	0.17925	-0.154546	13
Q8WXG6	MADD	MADD	#N/A	#N/A	MAP kinase-activating death domain protein	0.010923	-0.0706937	-0.100623	-0.19047	0.413486	-0.0924479	0.156785	-0.526244	0.179212	-0.140627	36
Q7L5N1;E7EM64	COPS6	COPS6	#N/A	#N/A	COP9 signalosome complex subunit 6	0.378623	0.309525	0.227371	0.134089	0.128821	-0.0746537	0.0321009	-0.0500244	0.178938	0.0334899	17
Q96FX7;H0Y2Q1	TRMT61A	TRMT61A	#N/A	#N/A	tRNA (adenine(58)-N(1))-methyltransferase catalytic subunit TRMT61A	0.490159	0.266277	0.242938	0.188274	0.111699	-0.0087548	-0.0572715	0.113967	0.17881	0.0931207	14
Q9Y3C6	PPIL1	PPIL1	#N/A	#N/A	Peptidyl-prolyl cis-trans isomerase-like 1	0.193456	0.151079	0.284988	0.0592169	0.0641931	0.0798389	0.0646069	0.0905825	0.17881	0.0695647	9
P01111	NRAS	NRAS	#N/A	#N/A	GTPase NRas	-0.107897	-0.144265	0.0751904	0.129613	0.275245	-0.118054	0.105946	-0.435768	0.178683	0.0110877	14
Q9Y2Q0	ATP8A1	ATP8A1	#N/A	#N/A	Phospholipid-transporting ATPase IA	-0.21739	-0.231566	-0.0417884	-0.137695	0.369606	-0.203203	0.195474	-0.560239	0.178523	-0.170077	20
H3BS09;Q9NQC7;J3KRR7	CYLD	CYLD	#N/A	#N/A	Ubiquitin carboxyl-terminal hydrolase CYLD	0.331934	0.0440444	0.0367495	-0.232955	0.307428	0.165815	0.505383	0.20364	0.178428	-0.0198358	6
Q13363;D6RAX2	CTBP1	CTBP1	#N/A	#N/A	C-terminal-binding protein 1	0.171591	0.165301	0.123931	0.177216	0.230572	-0.0761435	0.180403	0.00417777	0.178237	0.056091	24
O95551;X6R5A3	TDP2	TDP2	#N/A	#N/A	Tyrosyl-DNA phosphodiesterase 2			0.641638	-0.281299	-0.50865	-0.138203	-0.153816	0.232292	0.178224	-0.207978	5
Q92905	COPS5	COPS5	#N/A	#N/A	COP9 signalosome complex subunit 5	0.0889556	0.185232	0.208143	0.0896338	0.147437	0.0817487	0.0769695	0.0164963	0.178109	0.0856966	20
B1ANR0;Q13310	PABPC4	PABPC4	#N/A	#N/A	Polyadenylate-binding protein;Polyadenylate-binding protein 4	0.354339	0.0281448	0.183709	0.0164963	0.172103	0.129876	0.192699	0.161565	0.177918	0.0742999	45
Q9NP97;B1AKR6	DYNLRB1	DYNLRB1	#N/A	#N/A	Dynein light chain roadblock-type 1	-0.0740158	0.0343565	0.15562	0.0164963	0.199876	-0.0340422	0.0851526	-0.128787	0.177918	-0.00855164	7
B8ZZ31;E7ERP4;Q9BRB3;J3QTH6;A0A1B0GUF6;B8ZZ29	PIGQ	PIGQ	#N/A	#N/A	Phosphatidylinositol N-acetylglucosaminyltransferase subunit Q	-0.363419	-0.0385545	-0.00468191	-0.158494	0.339935	-0.0713303	0.0454429	-0.267548	0.177892	-0.114254	8
A0A087X152;O95185;E0CX15	UNC5C	UNC5C	#N/A	#N/A	Netrin receptor UNC5C	-0.75577	-0.294031	0.23634	-0.0260876	0.116764	0.214249	0.115166	-0.227472	0.17779	0.0990797	16
B0QYK0;Q01844;A0A0D9SFL3;C9JGE3	EWSR1	EWSR1	#N/A	#N/A	RNA-binding protein EWS	0.0724488	0.015212	0.309525	0.204892	0.0316775	0.0359054	0.103665	0.129349	0.17728	0.122872	10
Q12904	AIMP1	AIMP1	#N/A	#N/A	Aminoacyl tRNA synthase complex-interacting multifunctional protein 1;Endothelial monocyte-activating polypeptide 2	0.17645	0.0776532	0.134352	-0.0584279	0.218719	0.0586628	0.10286	0.00317045	0.177152	0.00130502	27
Q9UIC8;I3L4A2	LCMT1	LCMT1	#N/A	#N/A	Leucine carboxyl methyltransferase 1	0.140124	0.0878702	0.18612	0.0601858	0.167872	0.292193	0.0961269	0.296076	0.177025	0.180848	16
Q12979;A0A1C7CYZ0;A0A0G2JQ41;B7Z683	ABR	ABR	#N/A	#N/A	Active breakpoint cluster region-related protein	0.0666747	-0.0142955	0.0996318	-0.120231	0.250355	0.201132	0.337083	-0.0023102	0.176961	0.0493799	20
O14967	CLGN	CLGN	#N/A	#N/A	Calmegin	-0.248536	-0.183376	0.241596	-0.00598518	0.10916	-0.105194	-0.0707241	-0.160476	0.176897	-0.0547369	23
A0A494C169;Q9NVE7;E9PHT6;H0YA26	PANK4	PANK4	#N/A	#N/A	Pantothenate kinase 4	0.301119	0.00733906	0.140909	-0.0775281	0.211012	-0.00093804	0.136716	-0.1461	0.176387	-0.0387249	35
Q14696	MESDC2	MESDC2	#N/A	#N/A	LDLR chaperone MESD	0.0330882	-0.0780305	0.105544	0.0532504	0.243913	0.0856966	0.136323	0.0437644	0.176387	0.0695647	10
P15531	NME1	NME1	Predicted mitochondrial	#N/A	Nucleoside diphosphate kinase A	0.284159	0.102053	0.251204	0.139077	0.0972062	-0.0476515	-0.252621	0.0306892	0.176259	0.0487314	13
Q9BTV4	TMEM43	TMEM43	#N/A	#N/A	Transmembrane protein 43	-0.0248981	-0.11009	0.0486547	-0.0975945	0.293017	0.00906043	0.0816123	-0.174687	0.176004	-0.0432817	22
Q969S2	NEIL2	NEIL2	#N/A	#N/A	Endonuclease 8-like 2	0.0454429	-0.231667	0.0959919	-0.30349	0.251568	0.651224	0.290896	-0.370359	0.175876	0.25144	5
Q9UL25	RAB21	RAB21	Predicted mitochondrial	#N/A	Ras-related protein Rab-21	0.295841	-0.0954504	0.142479	-0.110869	0.208392	0.0354831	0.0347792	-0.0573617	0.175812	-0.035838	16
O14818	PSMA7	PSMA7	#N/A	#N/A	Proteasome subunit alpha type-7	0.15549	0.0254541	0.203389	0.0359054	0.147307	-0.0111663	0.135666	-0.0116462	0.17562	0.0125615	21
P53801;A8MXQ1	PTTG1IP	PTTG1IP	#N/A	#N/A	Pituitary tumor-transforming gene 1 protein-interacting protein	-0.425133	-0.124723	-0.0602468	-0.0487107	0.378179	0.166587	0.105946	-0.18843	0.175557	0.0629506	3
B5MCA1;Q96G28;B5MC35;B5MD16	CFAP36	CFAP36	#N/A	#N/A	Cilia- and flagella-associated protein 36			0.344828	0.656908	-0.016264	0.139862	0.0485151	0.168899	0.17555	0.421425	8
Q96HR9;A8MXN1;A8MWX0	REEP6	REEP6	#N/A	#N/A	Receptor expression-enhancing protein 6;Receptor expression-enhancing protein	-0.0896357	-0.344666	0.243547	-0.139792	0.1038	-0.170102	-0.0086387	-0.451386	0.175365	-0.154867	3
B1AHL2	FBLN1	FBLN1	#N/A	#N/A	Fibulin-1	-0.64801	-0.246053	0.307662	-0.520583	0.0297002	-0.686545	0.223299	-0.393141	0.175365	-0.601179	14
Q9UNF0	PACSIN2	PACSIN2	#N/A	#N/A	Protein kinase C and casein kinase substrate in neurons protein 2	0.0677764	0.351063	0.0330882	0.1133	0.304628	0.120086	0.129217	0.133169	0.175237	0.116697	18
Q86VN1;A0A3B3ISW7	VPS36	VPS36	#N/A	#N/A	Vacuolar protein-sorting-associated protein 36	0.312084	0.0673633	0.128689	-0.0457739	0.22033	-0.0398442	0.107554	-0.0840126	0.175237	-0.042806	17
C9J0K6;P30626;B4DHQ6	SRI	SRI	#N/A	#N/A	Sorcin	0.339935	0.255561	0.254594	0.0285691	0.0909888	-0.252896	0.0116388	-0.130176	0.175109	-0.10531	19
Q9UNS2;H7C3P9	COPS3	COPS3	#N/A	#N/A	COP9 signalosome complex subunit 3	0.22033	0.113034	0.138683	0.0643311	0.210514	0.0192037	0.127897	0.124725	0.175045	0.0419438	22
Q9NUJ3;E9PJ55	TCP11L1	TCP11L1	#N/A	#N/A	T-complex protein 11-like protein 1	0.568032	-0.0107593	-0.0663216	-0.379151	0.381283	0.246104	0.471968	-0.189401	0.174771	-0.0329126	13
P62837;A0A0A0MQU3;D6RFM0	UBE2D2	UBE2D2	#N/A	#N/A	Ubiquitin-conjugating enzyme E2 D2	0.35682	0.14496	0.466444	0.331247	-0.191986	-0.153719	0.232415	0.158337	0.17447	0.109046	5
A6NHX0	GATSL2	GATSL2	#N/A	#N/A	GATS-like protein 2	0.0652966	0.151859	0.164529	0.107152	0.184217	-0.110028	0.142217	-0.117224	0.174406	0.00264495	7
Q16537	PPP2R5E	PPP2R5E	#N/A	#N/A	Serine/threonine-protein phosphatase 2A 56 kDa regulatory subunit epsilon isoform	0.230941	0.0528332	0.185359	0.0172092	0.162983	-0.076691	0.142609	-0.0102651	0.174215	-0.0289771	28
P10599	TXN	TXN	#N/A	#N/A	Thioredoxin	0.123799	0.188274	0.213752	0.225152	0.133169	-0.0977488	-0.0791884	-0.0238124	0.174023	0.0727164	10
P52907	CAPZA1	CAPZA1	#N/A	#N/A	F-actin-capping protein subunit alpha-1	0.0716254	0.0436244	0.133169	0.0625362	0.213627	-0.0505024	0.128821	-0.0361412	0.173959	0.00712371	21
Q96FJ2	DYNLL2	DYNLL2	#N/A	#N/A	Dynein light chain 2, cytoplasmic	-0.0419815	0.102053	0.18612	0.0187766	0.161694	0.087327	0.241596	0.0194884	0.173959	0.0534589	9
Q96N16;F2Z2K5	JAKMIP1	JAKMIP1	#N/A	#N/A	Janus kinase and microtubule-interacting protein 1	0.335026	-1.18351	0.332622	-1.02436	-0.00443588	0.153027			0.173914	-0.318749	6
Q9NWT6;E9PL41	HIF1AN	HIF1AN	#N/A	#N/A	Hypoxia-inducible factor 1-alpha inhibitor	0.014641	-0.100639	-0.0390287	0.236217	0.359184	-0.0537932	0.000144286	-0.0248981	0.173773	0.0984869	6
P61201;B4DIH5;H0YKU5	COPS2	COPS2	#N/A	#N/A	COP9 signalosome complex subunit 2	0.194844	0.0361869	0.216734	0.10541	0.129085	0.00417777	0.0136409	-0.0260434	0.173575	0.0556815	30
Q5T6W2	HNRNPK	HNRNPK	Known mitochondrial	#N/A		-0.00856613	0.0458623	0.161694	0.164658	0.184979	0.0531114	0.231064	0.204141	0.173383	0.109962	32
O00399	DCTN6	DCTN6	#N/A	#N/A	Dynactin subunit 6	-0.0439433	-0.00333645	0.0776532	0.183074	0.263155	0.0549179	0.213005	0.218471	0.173383	0.120418	7
Q92688	ANP32B	ANP32B	#N/A	#N/A	Acidic leucine-rich nuclear phosphoprotein 32 family member B	0.184725	0.121944	0.22404	0.15043	0.120617	0.101381	-0.00715905	0.0869197	0.173255	0.126114	18
Q8NCN5;A8MT40;H3BQG3	PDPR	PDPR	Known mitochondrial	#N/A	Pyruvate dehydrogenase phosphatase regulatory subunit, mitochondrial	-0.200581	0.00934718	0.190678	0.118758	0.15562	-0.0757024	0.491391	-0.064329	0.173255	0.024802	30
Q15555;K7ERD8;K7EL66	MAPRE2	MAPRE2	#N/A	#N/A	Microtubule-associated protein RP/EB family member 2	0.141825	0.197614	0.0223323	0.117429	0.309409	0.105142	0.234133	-0.0671073	0.172999	0.111298	21
P09455;A0A0A0MTB9;H0YAK8	RBP1	RBP1	#N/A	#N/A	Retinol-binding protein 1	0.107554	0.334225	-0.109732	0.0690147	0.409255	0.0238941	0.0174944	0.000865329	0.172974	0.0466308	17
P54687	BCAT1	BCAT1	Predicted mitochondrial	#N/A	Branched-chain-amino-acid aminotransferase, cytosolic	0.275007	0.189413	0.259423	0.355693	0.0805212	0.105142	-0.0391621	0.127897	0.172744	0.23585	16
O15144	ARPC2	ARPC2	#N/A	#N/A	Actin-related protein 2/3 complex subunit 2	0.102457	0.0425042	0.14991	0.0471196	0.195222	-0.0891752	0.0946415	-0.0520122	0.172744	-0.0194189	31
Q96CW1;A0A087WY71;E9PFW3;C9JJ47	AP2M1	AP2M1	Predicted mitochondrial	#N/A	AP-2 complex subunit mu	-0.100855	-0.120577	0.0278618	-0.244822	0.303693	-0.10067	0.311271	-0.192629	0.17236	-0.170946	31
Q9P273	TENM3	TENM3	#N/A	#N/A	Teneurin-3	0.038998	-0.230008	0.230572	0.336283	0.111165	-0.0693913	0.110363	-0.120341	0.172103	0.147658	53
Q9ULC4	MCTS1	MCTS1	#N/A	#N/A	Malignant T-cell-amplified sequence 1	0.206768	0.188148	0.183709	0.141825	0.160017	-0.0147036	0.014641	0.0996318	0.171911	0.0656826	13
Q9P270;D6RIF6	SLAIN2	SLAIN2	#N/A	#N/A	SLAIN motif-containing protein 2	0.0909888	-0.0450741	0.42825	0.205768	-0.140173	-0.113785	-0.0687859	-0.00468191	0.171854	0.0548207	14
Q9NUI1;Q4VXZ8;G3V0I9;A0A0J9YXZ6;A0A0J9YY83;A0A0J9YWI0	DECR2	DECR2	#N/A	Peroxisomedb	Peroxisomal 2,4-dienoyl-CoA reductase			0.561008	0.193709	-0.363308	-1.02726	0.422018	-0.261933	0.171642	-0.291292	4
Q5VZ89	DENND4C	DENND4C	#N/A	#N/A	DENN domain-containing protein 4C	-0.0256175	0.0103502	0.16954	0.298189	0.173639	0.111298	0.0387171	-0.0239444	0.171591	0.207768	13
Q6P587	FAHD1	FAHD1	Known mitochondrial	#N/A	Acylpyruvase FAHD1, mitochondrial	-0.0796	0.142348	0.228357	0.0126402	0.111833	-0.196905	0.217851	-0.0148931	0.171271	-0.0883314	12
Q96FC7	PHYHIPL	PHYHIPL	Predicted mitochondrial	#N/A	Phytanoyl-CoA hydroxylase-interacting protein-like	0.27262	-0.0140916	0.0780633	-0.0808812	0.25882	0.0877344	0.264837	0.0589399	0.171271	0.0058886	25
O75934	BCAS2	BCAS2	#N/A	#N/A	Pre-mRNA-splicing factor SPF27	-0.0426054	0.0625362	0.249021	0.173383	0.0886844	0.185359	0.201885	0.159758	0.171079	0.179384	20
O94766;G3V150	B3GAT3	B3GAT3	#N/A	#N/A	Galactosylgalactosylxylosylprotein 3-beta-glucuronosyltransferase 3	0.0405417	-0.243387	0.042084	-0.212868	0.289244	-0.206645	0.0924781	-0.241953	0.170951	-0.209753	11
Q04917;A2IDB2	YWHAH	YWHAH	Predicted mitochondrial	#N/A	14-3-3 protein eta	0.193709	0.0736831	-0.035594	-0.00578236	0.350837	0.0441843	0.309642	0.0441843	0.170521	0.0194173	29
Q08257;A6NP24;C9JH92	CRYZ	CRYZ	Known mitochondrial	#N/A	Quinone oxidoreductase	0.133695	0.123004	0.247684	0.111966	0.0886844	-0.100438	0.145351	-0.0300593	0.170374	0.00966966	21
Q9NSK0	KLC4	KLC4	#N/A	#N/A	Kinesin light chain 4	-0.0976253	-0.195566	-0.0963909	-0.141573	0.395392	0.0694271	0.0947765	-0.147634	0.170355	-0.032219	22
Q8WVM8	SCFD1	SCFD1	#N/A	#N/A	Sec1 family domain-containing protein 1	0.134089	-0.050099	0.171463	-0.0328904	0.168899	-0.0811253	0.166201	-0.0834775	0.170181	-0.0568063	29
P11279	LAMP1	LAMP1	#N/A	#N/A	Lysosome-associated membrane glycoprotein 1	-0.0773455	-0.11416	0.167743	0.0522768	0.172616	0.0229004	0.177089	-0.0786856	0.170181	0.0376634	8
O60884	DNAJA2	DNAJA2	#N/A	#N/A	DnaJ homolog subfamily A member 2	-0.1588	-0.0152575	-0.0440326	0.0415233	0.356369	0.234379	-0.0775738	0.165301	0.170015	0.141171	23
P47756;B1AK85	CAPZB	CAPZB	#N/A	#N/A	F-actin-capping protein subunit beta	0.218223	0.140124	0.130272	-0.0863848	0.208642	-0.0619024	0.221444	0.0511633	0.169989	-0.0740917	20
P24534	EEF1B2	EEF1B2	Predicted mitochondrial	#N/A	Elongation factor 1-beta	0.167229	0.0856966	0.282499	0.0416635	0.0475383	-0.0632132	-0.0435716	0.0508847	0.169797	-0.00982205	15
O60925;E5RGS4	PFDN1	PFDN1	#N/A	#N/A	Prefoldin subunit 1	0.181166	0.0097772	0.248535	0.0650208	0.0852886	-0.0205307	-0.0754136	-0.0494271	0.169219	0.0228791	15
Q7L8L6	FASTKD5	FASTKD5	Known mitochondrial	#N/A	FAST kinase domain-containing protein 5	-0.651768	0.00633396	0.563353	0.109829	-0.375834	-0.0781676	0.234256	0.00115371	0.168873	0.0188905	21
O00400;H7C562;A0A2R8YF57	SLC33A1	SLC33A1	#N/A	#N/A	Acetyl-coenzyme A transporter 1	0.0953169	0.0291349	0.13014	0.0381553	0.205893	-0.0254119	0.129085	-0.128661	0.168514	0.00672174	8
Q5LJA5	UCHL5	UCHL5	#N/A	#N/A	Ubiquitin carboxyl-terminal hydrolase	0.192321	0.0900404	0.320542	0.066537	-0.00216568	0.021764	0.0590784	0.0839282	0.168193	0.0443242	25
Q13242;H0YIB4;S4R3G0	SRSF9	SRSF9	#N/A	#N/A	Serine/arginine-rich splicing factor 9	0.059909	-0.00595617	0.117296	0.0227584	0.217231	0.000432815	0.153546	-0.0433486	0.168129	0.0116388	26
Q9Y3A5;A0A087X020	SBDS	SBDS	#N/A	#N/A	Ribosome maturation protein SBDS	0.0970713	0.0747794	0.28238	0.0619835	0.0436244	0.0326651	0.161565	0.0777899	0.167936	0.0473988	19
O75569	PRKRA	PRKRA	#N/A	#N/A	Interferon-inducible double-stranded RNA-dependent protein kinase activator A	0.154583	0.0127833	0.0958569	0.00532815	0.236462	-0.074517	0.0684644	-0.138807	0.167872	-0.0340421	19
A0A0A0MT58;Q15560;Q5JRI7	TCEA2	TCEA2	#N/A	#N/A	Transcription elongation factor A protein 2	-0.0786398	0.387914	0.0116388	-0.207628	0.30871	0.311503	0.676719	0.121679	0.167808	0.075163	8
Q9NZB2;A0A0C4DG79	FAM120A	FAM120A	#N/A	#N/A	Constitutive coactivator of PPAR-gamma-like protein 1	0.153287	-0.0665331	0.190172	-0.129213	0.143655	-0.0268664	0.145351	-0.10386	0.167101	-0.0771324	44
Q13620;K4DI93	CUL4B	CUL4B	#N/A	#N/A	Cullin-4B	0.0170667	0.0275787	0.151599	0.0720372	0.182184	0.0153548	0.129745	0.100574	0.166973	0.0439744	42
Q05469	LIPE	LIPE	#N/A	#N/A	Hormone-sensitive lipase	0.303225	-0.0218337	0.0230425	0.0990932	0.296898	-0.0301183	0.0110662	-0.152869	0.166458	0.0359335	5
P23743;G3V4E1	DGKA	DGKA	#N/A	#N/A	Diacylglycerol kinase alpha;Diacylglycerol kinase	0.520548	0.00504059	-0.112568	-0.0573016	0.399991	-0.191426			0.166355	-0.122805	6
P43686	PSMC4	PSMC4	#N/A	#N/A	26S protease regulatory subunit 6B	0.102322	0.024887	0.224781	0.00705191	0.105142	0.00460933	0.021764	-0.0617218	0.166201	0.00583114	40
Q9UH99	SUN2	SUN2	#N/A	#N/A	SUN domain-containing protein 2	0.107152	-0.123685	0.164529	-0.222633	0.166844	-0.137648	0.0201999	0.0404014	0.165687	-0.179515	16
P14550	AKR1A1	AKR1A1	#N/A	#N/A	Alcohol dehydrogenase [NADP(+)]	0.434668	0.305095	0.0847447	0.0309717	0.242206	-0.193965	0.0856966	-0.0729987	0.165623	-0.0771171	23
Q13303;Q5TG81	KCNAB2	KCNAB2	#N/A	#N/A	Voltage-gated potassium channel subunit beta-2	-0.158027	0.0455827	0.0196308	0.0241777	0.297837	-0.171255	0.457227	-0.585951	0.16543	-0.0702318	9
A0A087X0K1;Q9Y376	CAB39	CAB39	#N/A	#N/A	Calcium-binding protein 39	0.130008	0.266517	0.153287	0.135798	0.177344	-0.0172857	0.480679	0.273337	0.165365	0.0612854	13
Q8WZA9	IRGQ	IRGQ	#N/A	#N/A	Immunity-related GTPase family Q protein	0.251325	0.20964	0.304861	0.257976	0.00992034	0.0159258	0.205142	0.304044	0.164915	0.142021	28
Q5VWZ2	LYPLAL1	LYPLAL1	Predicted mitochondrial	#N/A	Lysophospholipase-like protein 1	0.303927	0.370388	0.213627	0.448161	0.114234	-0.185556	0.287591	-0.0257203	0.164786	0.165822	12
E9PGC0;P20936	RASA1	RASA1	#N/A	#N/A	Ras GTPase-activating protein 1	0.0993626	-0.0730745	0.0835197	-0.0872735	0.24062	-0.0899582	0.205267	0.234133	0.164207	-0.0886152	15
Q9H270	VPS11	VPS11	#N/A	#N/A	Vacuolar protein sorting-associated protein 11 homolog	0.144177	0.103397	0.129745	0.033793	0.19774	-0.0282633	0.138028	-0.160282	0.164143	0.00309846	40
F8W717;A0A3B3IU69;O00423;G3V3N9;G3V500	EML1	EML1	#N/A	#N/A	Echinoderm microtubule-associated protein-like 1	0.475292	0.0899048	0.300768	-0.0481586	0.0129261	-0.0612249	0.362778	0.164529	0.164014	-0.054677	14
Q96II5;P10398	ARAF	ARAF	#N/A	#N/A	Serine/threonine-protein kinase A-Raf	0.383055	-0.0808812	-0.261552	-0.188151	0.492007	0.108223	-0.309199	-0.0297206	0.163879	-0.0323665	12
Q8WWB7;A0A087WV34;A0A087X0W3	GLMP	GLMP	#N/A	#N/A	Glycosylated lysosomal membrane protein	-0.114238	-0.314141	0.217479	-0.0672887	0.10809	-0.457217	0.109695	0.972031	0.163821	-0.249119	3
Q5GLZ8	HERC4	HERC4	#N/A	#N/A	Probable E3 ubiquitin-protein ligase HERC4	-0.10431	0.0346383	0.1956	-0.301888	0.131063	0.0945064	0.105946	-0.236215	0.163692	-0.0901194	16
Q70IA6;A0A087WVS8	MOB2	MOB2	#N/A	#N/A	MOB kinase activator 2	0.128821	0.105142	0.0877344	-0.0386582	0.23585	-0.190783	0.064469	-0.0503679	0.163692	-0.112717	7
A8MUP8;P10276;J3KSJ4	RARA	RARA	#N/A	#N/A	Retinoic acid receptor alpha	-0.391248	-0.309932	-0.267792	-0.288346	0.495286	0.227741			0.163621	-0.00734755	3
P61006	RAB8A	RAB8A	#N/A	#N/A	Ras-related protein Rab-8A	0.017922	-0.119698	0.146134	-0.129813	0.180784	0.0194884	0.0945064	-0.00157338	0.163563	-0.0532317	15
Q9NRD5;F6V107	PICK1	PICK1	#N/A	#N/A	PRKCA-binding protein	0.227002	0.0982848	-0.0166725	0.181548	0.323312	0.186754	0.271784	0.180784	0.163312	0.184153	13
C9J494;Q9H000	MKRN2	MKRN2	#N/A	#N/A	Probable E3 ubiquitin-protein ligase makorin-2	-0.486995	-0.0513244	0.174406	0.295958	0.152118	0.365692	-0.196938	-0.0339092	0.163305	0.331247	7
P05091	ALDH2	ALDH2	Known mitochondrial	#N/A	Aldehyde dehydrogenase, mitochondrial	-0.217508	-0.097826	0.154324	-0.127573	0.171847	-0.282193	0.299245	-0.269912	0.163112	-0.202813	45
Q9Y303;A0A3B3IU33	AMDHD2	AMDHD2	#N/A	#N/A	Putative N-acetylglucosamine-6-phosphate deacetylase			-0.0757329	0.158725	0.367818	0.0928839	0.325732	0.379954	0.163022	0.12618	7
Q9UH62	ARMCX3	ARMCX3	Known mitochondrial	#N/A	Armadillo repeat-containing X-linked protein 3	-0.103844	-0.00301835	-0.106203	-0.0543174	0.389787	0.0918014	0.564915	-0.0393697	0.163003	0.0205911	15
P06733;A0A2R8Y6G6	ENO1	ENO1	Predicted mitochondrial	#N/A	Alpha-enolase	0.223299	0.067088	0.251931	0.143002	0.0681893	-0.0244139	-0.0580824	0.0594937	0.162983	0.0617209	42
Q9H089;H7C2X7	LSG1	LSG1	#N/A	#N/A	Large subunit GTPase 1 homolog	0.0792927	-0.0750032	0.0911243	0.0340749	0.231064	0.0648829	-0.0321231	0.145482	0.16279	0.0495611	14
P46926;D6RAY7;D6R9P4;D6RFF8;D6RB13;D6R917	GNPDA1	GNPDA1	#N/A	#N/A	Glucosamine-6-phosphate isomerase 1;Glucosamine-6-phosphate isomerase	0.256165	0.234256	0.38659	0.262914	-0.102434	-0.163139	-0.0827439	0.0292761	0.1627	0.0655585	20
P46976;C9JQ42;G5E9W8	GYG1	GYG1	#N/A	#N/A	Glycogenin-1			0.204141	0.134484	0.119688	-0.0241644			0.162532	0.0573393	6
P0CG12	CHTF8	CHTF8	#N/A	#N/A	Chromosome transmission fidelity protein 8 homolog isoform 2	-0.274564	-0.180315	0.235114	-0.0681959	0.0858326	-0.265605	-0.27687	-0.152372	0.162403	-0.163526	7
Q9H8M2	BRD9	BRD9	#N/A	#N/A	Bromodomain-containing protein 9	-0.238817	-0.283088	-0.105225	0.0360461	0.387914	0.218099	0.0822938	0.200379	0.162313	0.129942	11
P51151	RAB9A	RAB9A	#N/A	#N/A	Ras-related protein Rab-9A	0.162597	-0.00141456	0.142609	0.0574155	0.181548	-0.105737	0.0764222	0.0182068	0.16221	-0.0218557	4
O75663	TIPRL	TIPRL	#N/A	#N/A	TIP41-like protein	0.0592169	0.0779266	0.10742	0.0504668	0.214498	-0.069134	0.0237522	-0.150241	0.161952	-0.00809458	22
Q5JTZ9	AARS2	AARS2	Known mitochondrial	#N/A	Alanine--tRNA ligase, mitochondrial	-1.15059	-0.209762	0.201508	-0.335353	0.121148	0.00100953	0.0244615	-0.174849	0.161888	-0.157391	35
P07237;H7BZ94	P4HB	P4HB	Known mitochondrial	#N/A	Protein disulfide-isomerase	0.0549179	-0.112272	0.0450235	-0.0450444	0.268913	-0.0368367	0.15549	-0.155888	0.161307	-0.0409347	57
O15121	DEGS1	DEGS1	#N/A	#N/A	Sphingolipid delta(4)-desaturase DES1	-0.208444	-0.118868	-0.0796153	-0.0659591	0.3667	-0.111118	0.235237	-0.305378	0.160733	-0.0883621	4
P50552	VASP	VASP	#N/A	#N/A	Vasodilator-stimulated phosphoprotein	0.148869	-0.0331561	0.123269	0.00504059	0.196481	-0.0487255	-0.0275132	-0.27275	0.160339	-0.021592	14
A0A3B3IUC4;P06280	GLA	GLA	#N/A	#N/A	Alpha-galactosidase A	0.256769	0.253142	0.20964	0.176195	0.109294	0.0190613	0.215492	-0.0126646	0.160339	0.0997664	11
Q5JY65;Q9BZJ0	CRNKL1	CRNKL1	#N/A	#N/A	Crooked neck-like protein 1	0.0866479	0.0339339	0.225028	-0.131139	0.0923428	0.0342158	0.217479	0.213254	0.16021	-0.0460941	34
Q99807;H3BP28	COQ7	COQ7	Known mitochondrial	#N/A	5-demethoxyubiquinone hydroxylase, mitochondrial	0.0340749	-0.0784875	-0.103147	0.0048968	0.382612	-0.39051	0.107152	0.0223323	0.160081	-0.179302	7
P31930	UQCRC1	UQCRC1	Known mitochondrial	#N/A	Cytochrome b-c1 complex subunit 1, mitochondrial	-0.00283043	0.117429	0.100843	0.0227584	0.216734	-0.0703756	0.400756	-0.0101344	0.159952	-0.0230572	30
Q9H497;Q5W0C6	TOR3A	TOR3A	#N/A	#N/A	Torsin-3A	-0.89266	-0.0559962	0.325041	-0.00987292	-0.028175	0.218595	-0.406254	-0.163526	0.159216	0.108879	7
P61158;B4DXW1	ACTR3	ACTR3	#N/A	#N/A	Actin-related protein 3	0.170438	0.095587	0.136848	0.0404014	0.180657	-0.0972086	0.123269	-0.0812474	0.158919	-0.0267635	32
Q8TF74	WIPF2	WIPF2	#N/A	#N/A	WAS/WASL-interacting protein family member 2			-0.0226248	0.0820213	0.319618	0.00877379	-0.15133	-0.480378	0.158621	0.0458624	8
B4DEE8;P16455	MGMT	MGMT	#N/A	#N/A	Methylated-DNA--protein-cysteine methyltransferase	-0.128393	0.00633396	0.208143	-0.138362	0.10675	-0.296421	0.115033	-0.19593	0.158337	-0.215228	6
B7Z2R7	ACBD5	ACBD5	#N/A	Peroxisomedb	Acyl-CoA-binding domain-containing protein 5	-0.245574	-0.232125	-0.0421894	-0.115801	0.334225	-0.0470701	0.165301	-0.103488	0.158259	-0.0810262	11
E9PL17;Q92989	CLP1	CLP1	#N/A	#N/A	Polyribonucleotide 5-hydroxyl-kinase Clp1	-0.0531045	0.238298	0.225398	0.439144	0.0862402	0.0255958	0.591392	0.980976	0.157497	0.247138	10
Q8NCE2	MTMR14	MTMR14	#N/A	#N/A	Myotubularin-related protein 14	-1.74899	-1.90293	0.158208	-0.0311941	0.156267	0.311736	-0.0430067	-0.0281898	0.157238	0.150436	7
O15173	PGRMC2	PGRMC2	Predicted mitochondrial	#N/A	Membrane-associated progesterone receptor component 2	0.15069	0.0214797	0.213129	-0.0126354	0.0990932	-0.0494868	-0.0343524	-0.139601	0.157238	-0.0309435	9
Q9H910;A6NGP5;H3BU16;H3BMV3;H3BMT0;H3BTV5	HN1L	HN1L	#N/A	#N/A	Hematological and neurological expressed 1-like protein	0.0207689	-0.0120243	0.267716	0.0122111	0.0374524	-0.0111372	0.0740944	0.0308304	0.157173	0.00058415	13
P67809;H0Y449	YBX1	YBX1	#N/A	#N/A	Nuclease-sensitive element-binding protein 1	0.187008	0.00216244	0.200002	0.0436244	0.112767	0.0489336	0.116098	0.147307	0.157044	0.0462815	21
Q9HBH5	RDH14	RDH14	Predicted mitochondrial	#N/A	Retinol dehydrogenase 14	0.109427	-0.0697244	0.294077	-0.0319019	0.00532815	-0.194922	0.0494913	-0.101025	0.156914	-0.111111	18
Q01484;E9PHW9;A0A0U1RQN6	ANK2	ANK2	#N/A	#N/A	Ankyrin-2	-0.0909105	0.00259443	0.0870554	0.1145	0.223423	-0.0873961	0.482848	-0.0115443	0.15685	0.017081	98
O75531	BANF1	BANF1	#N/A	#N/A	Barrier-to-autointegration factor;Barrier-to-autointegration factor, N-terminally processed	0.14991	0.104605	0.0749164	0.0160683	0.234256	0.0432045	0.128029	-0.00868222	0.156785	0.0297002	11
P62937;F8WE65;C9J5S7	PPIA	PPIA	#N/A	#N/A	Peptidyl-prolyl cis-trans isomerase A;Peptidyl-prolyl cis-trans isomerase A, N-terminally processed;Peptidyl-prolyl cis-trans isomerase	0.258941	0.210638	0.192068	0.1133	0.119821	-0.00306179	-0.0263079	0.0619835	0.156397	0.0562921	17
Q9UBS8;D6RA38;E7EP22	RNF14	RNF14	#N/A	#N/A	E3 ubiquitin-protein ligase RNF14	0.485118	0.179384	0.43776	0.0604624	-0.193668	0.101516			0.156319	0.0811351	6
Q8WXF1;X6RDA4	PSPC1	PSPC1	#N/A	#N/A	Paraspeckle component 1	0.237074	0.00173014	0.131985	0.0766959	0.180148	0.0617071	0.212134	0.0371714	0.156267	0.0692209	28
Q9BVK6	TMED9	TMED9	Predicted mitochondrial	#N/A	Transmembrane emp24 domain-containing protein 9	0.193961	0.0285691	0.0691523	-0.0225076	0.237808	0.0384361	0.0632269	-0.0603221	0.155944	0.00828606	15
P63010;A0A087X253;A0A087WU93;A0A087WZQ6;A0A087WYD1	AP2B1	AP2B1	Predicted mitochondrial	#N/A	AP-2 complex subunit beta	-0.0947415	-0.0668353	0.0110662	-0.102914	0.287591	-0.0464591	0.28155	-0.195137	0.155943	-0.0744107	72
Q5T0N5;S4R347;A0A075B6Q2	FNBP1L	FNBP1L	#N/A	#N/A	Formin-binding protein 1-like	-0.140078	0.113701	0.157561	0.0875986	0.154065	0.0227584	0.110497	-0.00507277	0.155814	0.0555428	36
P39687;H0YN26	ANP32A	ANP32A	#N/A	#N/A	Acidic leucine-rich nuclear phosphoprotein 32 family member A	0.0581087	0.167101	0.220206	0.199876	0.0882773	0.0277203	-0.0438987	0.0663992	0.155749	0.116365	19
Q6P4Q7	CNNM4	CNNM4	#N/A	#N/A	Metal transporter CNNM4	-0.00202118	0.844225	-0.17041	0.802483	0.421371	0.0492126	0.131194	-0.111851	0.155613	0.474462	14
Q9BXR0;K7ESP6	QTRT1	QTRT1	Known mitochondrial	#N/A	Queuine tRNA-ribosyltransferase	-0.0729228	0.183709	0.256286	0.307662	0.0467006	0.0419438	-0.299827	0.114767	0.155296	0.180912	10
A0A0D9SG71;P49459;A0A0R4J2E5	UBE2A	UBE2A	#N/A	#N/A	Ubiquitin-conjugating enzyme E2 A	-0.266021	-0.16571	0.102591	0.29901	0.206143	0.00259443	0.102457	0.157044	0.155296	0.158402	5
O95777;F2Z2Y6;C9JIZ0;C9JNV3	LSM8	LSM8	#N/A	#N/A	U6 snRNA-associated Sm-like protein LSm8	0.0697021	0.147828	0.13711	0.169668	0.173128	-0.0337467	0.0776532	0.164786	0.155231	0.071543	7
A0A1W2PPX5;A0A1W2PQR6;A0A1W2PQB7;A0A1W2PS43;Q14108;A0A1W2PRS1;A0A1W2PPU6;A0A1W2PSE4	SCARB2	SCARB2	Predicted mitochondrial	#N/A	Lysosome membrane protein 2	-0.110044	-0.11491	0.1129	-0.0187757	0.196355	-0.0847315	0.0244615	-0.148129	0.155231	-0.0513767	15
P28702;A0A0G2JKR7	RXRB	RXRB	#N/A	#N/A	Retinoic acid receptor RXR-beta	-0.109499	0.0126402	-0.0112535	-0.022493	0.304161	0.125122	0.0482362	-0.0661102	0.155056	0.0532017	14
Q6PIJ6	FBXO38	FBXO38	#N/A	#N/A	F-box only protein 38	-0.52338	-0.338451	-0.139188	0.0364681	0.399007	-0.00552165	-0.300288	-0.156257	0.154862	0.015626	7
Q7KZ85	SUPT6H	SUPT6H	#N/A	#N/A	Transcription elongation factor SPT6	-0.236079	-0.0545271	0.168899	0.0882773	0.140124	0.151729	0.124063	0.138552	0.154583	0.120352	76
P84085;C9J1Z8	ARF5	ARF5	#N/A	#N/A	ADP-ribosylation factor 5	0.0299829	0.00446549	0.0536674	0.0641931	0.248899	0.00331442	0.128161	-0.018425	0.154583	0.0340749	19
P53609	PGGT1B	PGGT1B	#N/A	#N/A	Geranylgeranyl transferase type-1 subunit beta	0.366924	-0.138966	0.0832474	0.13947	0.222434	-0.13922	0.0903115	0.31823	0.154518	0.00684378	7
A0A087WT92;Q0VGL1;A0A087WV46;C9JXA7	LAMTOR4	LAMTOR4	#N/A	#N/A	Ragulator complex protein LAMTOR4;Ragulator complex protein LAMTOR4, N-terminally processed	-0.141494	-0.170914	0.1503	0.228111	0.158596	-0.0709665	0.0129261	-0.0850222	0.154454	0.0863083	3
Q5T2E6	C10orf76	C10orf76	#N/A	#N/A	UPF0668 protein C10orf76	-0.135364	-0.114535	0.151209	-0.0706483	0.157561	0.0219061	0.0962619	0.0585243	0.154389	-0.023629	7
A0A088AWN2;Q8TBZ3	WDR20	WDR20	#N/A	#N/A	WD repeat-containing protein 20	-0.13984	-0.261984	0.00906043	-0.0759305	0.28629	0.0247452	0.380286	-0.0645856	0.154324	-0.0247147	11
O95619;F8W0J4;F8W1B9;F8VTR4	YEATS4	YEATS4	#N/A	#N/A	YEATS domain-containing protein 4	0.505891	0.128821	0.107286	-0.0545721	0.199374	-0.101165	0.238053	0.403704	0.154065	-0.0776803	7
C4AMC7;Q6VEQ5;A8K0Z3;A8MWX3	WASH3P;WASH2P;WASH1;WASH4P	WASH3P	#N/A	#N/A	Putative WAS protein family homolog 3;WAS protein family homolog 2;WAS protein family homolog 1;Putative WAS protein family homolog 4	0.148609	0.143002	0.36042	0.0193461	-0.0869364	-0.190536	0.0703893	-0.139331	0.154013	-0.0817817	10
O60443;C9JSR4	DFNA5	DFNA5	#N/A	#N/A	Non-syndromic hearing impairment protein 5	0.143916	0.00805652	0.00762616	-0.012519	0.286645	-0.00288824	0.0713507	-0.171044	0.15387	-0.0076956	21
Q15208	STK38	STK38	#N/A	#N/A	Serine/threonine-protein kinase 38	0.0182068	-0.225076	-0.0647213	-0.235246	0.343465	0.188021	0.273814	-0.0161472	0.15376	-0.00814535	21
Q9P0J1	PDP1	PDP1	Known mitochondrial	#N/A	[Pyruvate dehydrogenase [acetyl-transferring]]-phosphatase 1, mitochondrial	-0.484328	-0.027425	0.0233263	-0.344209	0.272979	-0.141876	0.294782	0.0114957	0.153546	-0.239498	18
A0A0D9SGF6	SPTAN1	SPTAN1	#N/A	#N/A		-0.0862776	-0.0607434	-0.0156075	-0.205597	0.304861	-0.0899274	0.403268	-0.0917404	0.153507	-0.146603	253
O75391;I3L0X5;I3L4C3	SPAG7	SPAG7	#N/A	#N/A	Sperm-associated antigen 7	-0.0904189	-0.0141499	0.335483	0.314755	-0.0549317	-0.0834317	-0.0737273	-0.141016	0.153442	0.129356	10
Q13217;X6R9L0	DNAJC3	DNAJC3	#N/A	#N/A	DnaJ homolog subfamily C member 3	-0.0306339	-0.137902	-0.101304	-0.130602	0.369383	-0.090634	-0.0906954	-0.280405	0.15315	-0.11048	22
Q86YN1	DOLPP1	DOLPP1	#N/A	#N/A	Dolichyldiphosphatase 1	-0.0833094	-0.138092	0.0611541	0.0561673	0.23952	0.12618	0.124725	0.0464211	0.153092	0.0915983	4
A0A2Q3DP09;Q7Z3E5;H7C3U7;H7BZY2	ARMC9	ARMC9	#N/A	#N/A	LisH domain-containing protein ARMC9	0.212881	-0.758087	0.136979	-0.369818	0.16877	-0.120608	0.502432	-0.513831	0.152962	-0.239839	15
Q13451	FKBP5	FKBP5	#N/A	#N/A	Peptidyl-prolyl cis-trans isomerase FKBP5;Peptidyl-prolyl cis-trans isomerase FKBP5, N-terminally processed	0.354001	-0.0332743	0.123401	-0.0223317	0.181802	0.1595	-0.0825759	0.126312	0.152897	0.0714469	25
Q9UDT6	CLIP2	CLIP2	#N/A	#N/A	CAP-Gly domain-containing linker protein 2	-0.20553	-0.0913562	-0.0128538	-0.176495	0.301354	-0.203419	0.29725	-0.25257	0.152787	-0.189894	34
Q9H2G2	SLK	SLK	#N/A	#N/A	STE20-like serine/threonine-protein kinase	0.357833	-0.0347957	0.101919	-0.16025	0.201508	-0.142274	0.226632	-0.0288372	0.152573	-0.151234	39
E7EX90;Q6AWB1	DCTN1;DKFZp686E0752	DCTN1	#N/A	#N/A				0.151989	0.444879	0.153027	-0.0455207	0.107152	0.010923	0.152508	0.220417	84
Q6PJF5	RHBDF2	RHBDF2	#N/A	#N/A	Inactive rhomboid protein 2	-0.423178	-0.311238	0.111566	-0.266125	0.192194	-0.0242671	0.104739	-0.103286	0.152443	-0.140134	5
Q8TDX7	NEK7	NEK7	#N/A	#N/A	Serine/threonine-protein kinase Nek7	0.0719	-0.332771	-0.10019	-0.442007	0.367259	-0.0902499	0.23842	-0.39627	0.152385	-0.255434	6
O75083	WDR1	WDR1	#N/A	#N/A	WD repeat-containing protein 1	0.19497	0.0565835	0.100574	0.0312541	0.202261	0.0054719	0.169412	0.0574155	0.152313	0.0184206	39
Q99720;Q5T1J1	SIGMAR1	SIGMAR1	#N/A	#N/A	Sigma non-opioid intracellular receptor 1	-0.235603	-0.224705	0.0475383	-0.134192	0.249749	-0.0202234	-0.0369402	-0.2768	0.152183	-0.0760826	4
O14976	GAK	GAK	#N/A	#N/A	Cyclin-G-associated kinase	-0.140651	-0.0378286	0.0571383	0.013498	0.24123	0.122607	0.236584	0.00432164	0.152119	0.0690835	28
Q6SZW1	SARM1	SARM1	Known mitochondrial	#N/A	Sterile alpha and TIR motif-containing protein 1	0.168899	0.0908535	0.117296	-0.0322117	0.185867	-0.0605327	0.16337	-0.0142664	0.151989	-0.0463027	37
P49593;B5MCT7;A8MX49	PPM1F	PPM1F	#N/A	#N/A	Protein phosphatase 1F	0.282736	0.10608	0.146655	-0.0984747	0.156914	-0.101149	-0.0782285	-0.0329052	0.151794	-0.0998114	18
Q8IVL6	LEPREL2	LEPREL2	#N/A	#N/A	Prolyl 3-hydroxylase 3	0.295135	-0.117412	0.254836	-0.21734	0.040682	0.135009	0.251204	0.212258	0.151729	-0.0304351	18
Q9UEG4	ZNF629	ZNF629	#N/A	#N/A	Zinc finger protein 629	-0.162913	-0.0352096	0.152378	0.00633396	0.150949	0.177344	0.146655	-0.0224197	0.151664	0.0943712	21
O75165	DNAJC13	DNAJC13	#N/A	#N/A	DnaJ homolog subfamily C member 13	0.213752	-0.130097	0.00805652	-0.252604	0.281669	0.0204844	0.227125	-0.0965915	0.151339	-0.109608	70
Q96SZ5	ADO	ADO	Predicted mitochondrial	#N/A	2-aminoethanethiol dioxygenase	-0.0531494	0.130799	0.15562	0.161694	0.146525	0.0754641	0.0154976	0.104605	0.151079	0.119223	14
A0A087WZA9;A0A024R4K9;A0A087X266;Q9BXJ8	TMEM120A;TMPIT	TMEM120A	#N/A	#N/A	Transmembrane protein 120A	-0.261466	-0.242908	-0.0522216	-0.184867	0.328722	-0.146627	0.133169	-0.352566	0.150787	-0.16562	6
Q8N138;J3KTF9;J3QRM9	ORMDL3	ORMDL3	#N/A	#N/A	ORM1-like protein 3	-0.0300888	0.0758749	0.162081	0.351289	0.139077	0.170822	0.0196308	0.0169242	0.150625	0.263876	3
O15066	KIF3B	KIF3B	#N/A	#N/A	Kinesin-like protein KIF3B;Kinesin-like protein KIF3B, N-terminally processed	0.0540844	0.0176369	0.00245056	0.0859685	0.28404	-0.041239	-0.280335	-0.167183	0.150105	0.0237664	28
P14923	JUP	JUP	#N/A	#N/A	Junction plakoglobin	-0.412424	-0.179515	0.0574155	-0.121188	0.237197	-0.239055	0.27262	-0.293253	0.150105	-0.178918	24
Q8TC12;G3V2G6;G3V234;H0YJ46	RDH11	RDH11	#N/A	#N/A	Retinol dehydrogenase 11	-0.140523	-0.0983357	0.129085	-0.0169499	0.170694	-0.083875	0.129613	-0.103937	0.15004	-0.0500244	16
Q8IXB1	DNAJC10	DNAJC10	#N/A	Peroxisomedb	DnaJ homolog subfamily C member 10	0.0159258	-0.0699061	0.00129789	0.0139266	0.284869	-0.109888	0.180912	-0.127888	0.15004	-0.0466528	35
Q92610;H0YM74	ZNF592	ZNF592	#N/A	#N/A	Zinc finger protein 592	-0.0547969	0.245252	-0.234024	0.197865	0.452385	0.838185	0.139993	-0.269043	0.149624	0.553262	5
Q8TDJ6	DMXL2	DMXL2	#N/A	#N/A	DmX-like protein 2	0.15562	0.124461	-0.0713151	-0.0763412	0.341075	0.081476	0.0874628	0.0805212	0.149565	0.00472427	40
P07902;G3V4G9	GALT	GALT	#N/A	#N/A	Galactose-1-phosphate uridylyltransferase	0.399882	0.137635	0.479644	0.232292	-0.279319	-0.346371	0.166844	0.321466	0.149507	-0.0282192	5
B4DR61;P61619	SEC61A1	SEC61A1	#N/A	#N/A	Protein transport protein Sec61 subunit alpha isoform 1	0.0216219	-0.123528	0.00259443	-0.116661	0.282736	-0.0260141	0.1149	-0.187674	0.149454	-0.0706256	16
Q96GD0	PDXP	PDXP	#N/A	#N/A	Pyridoxal phosphate phosphatase	0.064469	-0.0197699	0.168514	0.0347792	0.130008	-0.0555013	0.0203421	0.0716254	0.14939	-0.00965501	14
Q8NFI3;F8W925	ENGASE	ENGASE	#N/A	#N/A	Cytosolic endo-beta-N-acetylglucosaminidase	0.0126402	0.158337	0.193078	0.323774	0.103397	0.0339339	0.220701	-0.13242	0.148934	0.18612	8
P12081;B3KWE1;B4DDD8;B4E1C5	HARS	HARS	#N/A	#N/A	Histidine--tRNA ligase, cytoplasmic	0.169027	0.0558898	0.296545	0.131063	-0.0160305	-0.0105848	0.00848693	0.0797024	0.148706	0.0619767	41
Q14141;B1AMS2	SEPT6	SEPT6	#N/A	#N/A	Septin-6	-0.0725435	-0.01749	0.0772429	0.00518438	0.216238	-0.0581124	0.0999011	-0.224638	0.148414	-0.0261169	33
Q86WA8;E7EN44	LONP2	LONP2	#N/A	Peroxisomedb	Lon protease homolog 2, peroxisomal	0.335941	-0.260567	0.410884	-0.00881285	-0.172734	-0.157608	-0.101381	-0.240384	0.148387	-0.0812932	14
C9JEA7;Q9BRC7	PLCD4	PLCD4	#N/A	#N/A	Phosphoinositide phospholipase C;1-phosphatidylinositol 4,5-bisphosphate phosphodiesterase delta-4	0.0915306	-0.174035	-0.0424419	-0.393008	0.316841	-0.111118	0.131326	-0.763073	0.148355	-0.245189	20
Q12802;A0A087WTD7;A8MYJ1	AKAP13	AKAP13	#N/A	#N/A	A-kinase anchor protein 13	0.0489336	-0.00913223	0.297837	0.323428	-0.0184688	-0.135206	0.0364681	0.132116	0.148335	0.11226	29
Q8IWT0;D3DPQ2;A0A087X0V4;A8K0B5	ZBTB8OS	ZBTB8OS	#N/A	#N/A	Protein archease			0.210514	0.0976109	0.0832474	0.146003			0.148283	0.12201	4
P07919	UQCRH	UQCRH	Known mitochondrial	#N/A	Cytochrome b-c1 complex subunit 6, mitochondrial	-0.343165	-0.0432296	-0.025779	-0.0926632	0.303576	0.0549179	0.372283	0.0569996	0.148277	-0.0169864	4
P07737;K7EJ44	PFN1	PFN1	#N/A	#N/A	Profilin-1	0.221197	0.107018	0.147046	0.0297002	0.149129	-0.0380211	-0.00617352	0.0413831	0.148088	-0.00376311	21
Q9H974	QTRTD1	QTRTD1	Known mitochondrial	#N/A	Queuine tRNA-ribosyltransferase subunit QTRTD1	-0.104868	0.163628	0.133432	0.102457	0.162339	0.473631	-0.34108	0.577441	0.147958	0.299948	10
Q8NAT1	POMGNT2	POMGNT2	#N/A	#N/A	Protein O-linked-mannose beta-1,4-N-acetylglucosaminyltransferase 2			-0.238545	0.0680517	0.45249	0.105678	-0.183589	0.0524158	0.147958	0.0869875	6
P78310	CXADR	CXADR	#N/A	#N/A	Coxsackievirus and adenovirus receptor	-0.384584	-0.143118	-0.106343	0.204642	0.363788	0.283211	0.221939	-0.0704211	0.147789	0.244461	8
H0Y5K5;Q9Y282;A0A1W2PPS8;H0Y621	ERGIC3	ERGIC3	#N/A	#N/A	Endoplasmic reticulum-Golgi intermediate compartment protein 3	0.175429	0.146786	0.173511	-0.0165558	0.121546	0.0828389	0.0464211	-0.0160597	0.147763	0.0339973	7
Q86YS7	C2CD5	C2CD5	#N/A	#N/A	C2 domain-containing protein 5	-0.208944	-0.0209844	0.269153	0.258941	0.015212	-0.211097	0.041243	0.191057	0.147763	0.0429804	16
P61160;F5H6T1	ACTR2	ACTR2	#N/A	#N/A	Actin-related protein 2	0.0875986	0.0280033	0.09815	-0.0343819	0.1956	-0.0833094	0.102457	-0.038599	0.147697	-0.0586382	29
F5H365;Q15436	SEC23A	SEC23A	#N/A	#N/A	Protein transport protein Sec23A	0.181548	0.0124972	0.0532504	-0.0503531	0.23634	-0.0698304	0.0723116	-0.109748	0.147697	-0.0600588	39
P68363	TUBA1B	TUBA1B	#N/A	#N/A	Tubulin alpha-1B chain	0.216238	0.154713	0.0738202	0.0992279	0.217851	0.0309717	0.049352	0.0244615	0.147632	0.0655034	44
P28072	PSMB6	PSMB6	#N/A	#N/A	Proteasome subunit beta type-6	0.124461	0.0395595	0.158337	-0.07224	0.136585	-0.0605327	0.140124	-0.0704817	0.147502	-0.0663745	9
O75061	DNAJC6	DNAJC6	#N/A	#N/A	Putative tyrosine-protein phosphatase auxilin	0.185993	0.0399806	0.0332292	-0.0552465	0.252779	0.0328061	-0.21739	-0.10583	0.147176	-0.0105485	23
Q8ND56	LSM14A	LSM14A	#N/A	#N/A	Protein LSM14 homolog A	0.0301242	-0.0321084	0.123534	0.00432164	0.17031	-0.0265283	0.15004	-0.0639219	0.147111	-0.0110209	15
Q86X76	NIT1	NIT1	Known mitochondrial	#N/A	Nitrilase homolog 1	0.192699	-0.0534637	0.00690831	-0.16579	0.27453	-0.430295	0.155102	-0.299418	0.146916	-0.291989	13
Q9UMS4	PRPF19	PRPF19	#N/A	#N/A	Pre-mRNA-processing factor 19	0.205643	0.194339	0.187894	0.167615	0.104605	0.00877379	0.169027	0.102188	0.146851	0.0903793	35
P43155	CRAT	CRAT	Known mitochondrial	Peroxisomedb	Carnitine O-acetyltransferase	-0.430859	-0.352437	0.0097772	-0.340295	0.271904	-0.421979	0.353549	-0.205497	0.146786	-0.380559	17
Q9H6U6;K7ESE9	BCAS3	BCAS3	#N/A	#N/A	Breast carcinoma-amplified sequence 3	0.015212	0.285816	-0.142322	0.090447	0.387363	0.205518			0.146694	0.149129	8
Q96JB2	COG3	COG3	#N/A	#N/A	Conserved oligomeric Golgi complex subunit 3	0.0688772	0.0163537	0.0356239	-0.0597957	0.249749	0.0691523	0.245861	0.0681893	0.146655	0.00611849	16
Q8IZH2;H7C5E4	XRN1	XRN1	#N/A	#N/A	5-3 exoribonuclease 1	-0.164448	-0.244189	0.1644	-0.113208	0.128689	0.0312541	0.14965	-0.0717093	0.146655	-0.0391695	20
Q9Y478;F5H2X8	PRKAB1	PRKAB1	#N/A	#N/A	5-AMP-activated protein kinase subunit beta-1	-0.0555313	-0.13841	-0.173075	0.0129261	0.408168	0.192321	0.394075	-0.128298	0.146623	0.10541	7
Q96NC0;R4GNG8	ZMAT2	ZMAT2	#N/A	#N/A	Zinc finger matrin-type protein 2	-0.047741	-0.0373103	0.223299	0.0805212	0.0648829	-0.0836609	0.0697021	0.0227584	0.146264	0.000764432	11
Q63HM9	PLCXD3	PLCXD3	#N/A	#N/A	PI-PLC X domain-containing protein 3	-0.0248688	0.0130691	0.256165	0.131721	0.0267293	-0.200531	-0.232108	-0.149217	0.146003	-0.0248614	12
Q99442;F8WF48;F8WCJ7	SEC62	SEC62	#N/A	#N/A	Translocation protein SEC62	0.057277	-0.0133779	0.0342158	0.0126402	0.249749	-0.0541976	0.012068	-0.233617	0.146003	-0.0203916	8
A0A087WVF7;Q9NZM3;E7EPJ2	ITSN2	ITSN2	#N/A	#N/A	Intersectin-2	0.244278	-0.114223	0.075738	-0.179335	0.212881	-0.297591	0.165687	-0.280668	0.145938	-0.237251	16
P52594;B8ZZY2;C9J2I0	AGFG1	AGFG1	#N/A	#N/A	Arf-GAP domain and FG repeat-containing protein 1	0.327342	0.0473989	0.0781998	0.0309717	0.210638	-0.0201649	0.153676	-0.17041	0.145938	0.00562995	14
Q53FV1;F6WST4;A0A1B0GXE7;F8VXD5	ORMDL2;ORMDL1	ORMDL2	#N/A	#N/A	ORM1-like protein 2	-0.0306635	0.0187766	0.506196	0.0306892	-0.335681	0.295723	-0.289915	-0.00358228	0.145814	0.169284	3
Q9ULH0;A0A1W2PPB7	KIDINS220	KIDINS220	#N/A	#N/A	Kinase D-interacting substrate of 220 kDa	-0.0878867	-0.316654	0.241962	-0.190437	0.0427844	-0.170443	-0.0176215	-0.0631077	0.145808	-0.180405	75
O43314;A0A087WZV0	PPIP5K2	PPIP5K2	#N/A	#N/A	Inositol hexakisphosphate and diphosphoinositol-pentakisphosphate kinase 2	0.139862	-0.0324182	0.0106367	-0.0420557	0.269273	0.0274371	-0.0683774	-0.207428	0.145743	-0.00689088	34
Q9NRG0	CHRAC1	CHRAC1	#N/A	#N/A	Chromatin accessibility complex protein 1	-0.00365461	0.108357	0.414677	0.511063	-0.185556	0.175812	-0.355461	0.559247	0.145554	0.353154	5
P17026	ZNF22	ZNF22	#N/A	#N/A	Zinc finger protein 22	-0.101459	-0.0954504	0.162597	0.0486547	0.127501	0.0139266	0.334111	-0.0637559	0.145156	0.0313951	12
Q5QPK2;O60762;H0Y368;Q5QPJ9	DPM1	DPM1	#N/A	#N/A	Dolichol-phosphate mannosyltransferase subunit 1	0.101112	-0.0596152	0.124461	-0.00630393	0.165172	0.028852	0.0501883	-0.0949418	0.14496	0.0113811	19
P61026	RAB10	RAB10	Predicted mitochondrial	#N/A	Ras-related protein Rab-10	-0.0487852	-0.0554863	0.0619835	-0.0140042	0.223423	-0.0421152	0.139601	-0.166535	0.14496	-0.0279912	21
P25789;H0YMZ1;H0YN18;H0YL69;H0YMA1;H0YKT8;H0YMI6;H0YLC2	PSMA4	PSMA4	#N/A	#N/A	Proteasome subunit alpha type-4;Proteasome subunit alpha type;Proteasome subunit beta type	0.149389	0.124063	0.230572	0.081067	0.0536674	-0.0470253	0.117961	-0.0345149	0.14483	0.018442	22
Q9Y217	MTMR6	MTMR6	#N/A	#N/A	Myotubularin-related protein 6	-0.0613905	-0.0939407	-0.116113	-0.187362	0.365357	-0.044717	0.0943712	-0.198725	0.144614	-0.114277	23
P14927;B7Z2R2	UQCRB	UQCRB	Known mitochondrial	#N/A	Cytochrome b-c1 complex subunit 7	-0.0810032	-0.0871969	-0.0387175	-0.188233	0.307195	-0.253928	0.490057	-0.170248	0.144582	-0.220707	11
Q8TF68;E9PHB3	ZNF384	ZNF384	#N/A	#N/A	Zinc finger protein 384	-0.0938328	-0.204333	0.141825	0.108759	0.147176	-0.0554263	0.098689	0.0492126	0.144503	0.0290005	8
Q9UKJ3	GPATCH8	GPATCH8	#N/A	#N/A	G patch domain-containing protein 8	0.224534	0.182819	0.0938305	0.0831112	0.193204	0.00374607	-0.00987292	-0.0666389	0.144373	0.0439743	11
P78560	CRADD	CRADD	#N/A	#N/A	Death domain-containing protein CRADD	0.703544	0.488104	0.208767	0.0451634	0.0768327	0.0717627	0.178492	0.280956	0.144307	0.0585243	4
P33176	KIF5B	KIF5B	#N/A	#N/A	Kinesin-1 heavy chain	0.0692898	-0.0136255	0.00158601	-0.0303098	0.273934	0.00532815	0.1038	-0.134635	0.144177	-0.0123808	98
Q9UMX5	NENF	NENF	#N/A	#N/A	Neudesin	0.0546401	-0.115019	-0.0162931	-0.105411	0.288299	-0.0674701	0.20989	-0.290586	0.144027	-0.0863159	12
P24386	CHM	CHM	#N/A	#N/A	Rab proteins geranylgeranyltransferase component A 1	0.171335	0.00187425	0.351628	0.317767	-0.0993399	-0.0297795	0.179129	0.210264	0.143694	0.154434	14
P10644;K7EPB2;K7EM13	PRKAR1A	PRKAR1A	#N/A	#N/A	cAMP-dependent protein kinase type I-alpha regulatory subunit;cAMP-dependent protein kinase type I-alpha regulatory subunit, N-terminally processed	0.0129261	0.00432164	0.208143	0.0114957	0.0760118	-0.0190972	0.104068	0.0888201	0.143589	-0.0037197	14
B4DUC8;Q13126;J3QSB7	MTAP	MTAP	#N/A	#N/A	S-methyl-5-thioadenosine phosphorylase;Purine nucleoside phosphorylase	0.139731	0.0201999	0.217355	0.135666	0.0657101	0.0301242	-0.0984747	0.0666747	0.143524	0.0838601	16
P53041;H0YDU8;A8MU39	PPP5C	PPP5C	#N/A	#N/A	Serine/threonine-protein phosphatase 5;Serine/threonine-protein phosphatase	0.0568609	0.0666747	0.222434	0.0758749	0.0600474	0.1145	0.00187425	0.040121	0.143524	0.0953169	31
Q9UHA4	LAMTOR3	LAMTOR3	Predicted mitochondrial	#N/A	Ragulator complex protein LAMTOR3	0.396269	0.410558	0.0710762	-0.035801	0.212507	-0.150481	0.112233	0.244644	0.143524	-0.0920018	4
A0A1C7CYX9;Q16555	DPYSL2	DPYSL2	#N/A	#N/A	Dihydropyrimidinase-related protein 2	-0.010861	0.0278618	0.0850168	0.037312	0.199374	-0.0876414	0.106348	-0.0890371	0.143328	-0.0238123	57
Q3SXM5	HSDL1	HSDL1	Known mitochondrial	#N/A	Inactive hydroxysteroid dehydrogenase-like protein 1	-0.468052	-0.300466	0.0054719	-0.016979	0.269153	0.0557509	0.268315	0.10286	0.143328	0.0198442	10
P61106;X6RFL8	RAB14	RAB14	#N/A	#N/A	Ras-related protein Rab-14	0.120617	-0.0232991	0.168257	0.0478175	0.117695	0.0127833	0.0194884	-0.0414765	0.143198	0.0304067	23
A0A087WU53;Q9H0U3	MAGT1	MAGT1	#N/A	#N/A	Magnesium transporter protein 1	0.0922074	-0.15814	0.184217	0.00144204	0.100978	-0.0250302	0.0999011	-0.218028	0.143197	-0.0117334	9
P53990;H3BMU1;H3BUI0;H3BQF7;J3KR23;F5GXM3	IST1	IST1	#N/A	#N/A	IST1 homolog	-0.0878714	-0.0781067	-0.0194189	-0.0936943	0.289126	-0.120263	0.0160683	-0.282667	0.143086	-0.106917	13
P14868	DARS	DARS	#N/A	#N/A	Aspartate--tRNA ligase, cytoplasmic	0.245374	0.0701146	0.0963968	-0.00183338	0.188274	-0.0311941	0.116897	-0.100732	0.143067	-0.0164391	51
Q93034	CUL5	CUL5	#N/A	#N/A	Cullin-5	0.217975	0.00460933	0.168642	0.000288558	0.11703	-0.0175631	0.102322	-0.10552	0.143067	-0.00860964	46
A8MVZ6;Q96G01	BICD1	BICD1	#N/A	#N/A	Protein bicaudal D homolog 1	0.543991	-0.348335	-0.146052	0.235482	0.383386	-0.0445236	0.126312	-0.867015	0.142819	0.102262	11
Q66K74	MAP1S	MAP1S	#N/A	#N/A	Microtubule-associated protein 1S;MAP1S heavy chain;MAP1S light chain	0.246591	0.0695647	0.0124972	-0.175387	0.261591	-0.0616615	0.125519	-0.207844	0.142413	-0.117404	35
O15228;Q5TBH8	GNPAT	GNPAT	#N/A	Peroxisomedb	Dihydroxyacetone phosphate acyltransferase	0.239398	-0.100824	0.0905825	-0.00137118	0.191942	-0.0301036	0.1153	-0.0571815	0.142152	-0.0156659	32
Q8WVR3;H7C1F8;B3KNS5	C7orf43	C7orf43	#N/A	#N/A	Uncharacterized protein C7orf43			0.0592169	0.143002	0.219835	-0.153559			0.14176	0.0023281	3
Q9NQC3	RTN4	RTN4	#N/A	#N/A	Reticulon-4	-0.223172	-0.0935865	0.00647761	-0.125321	0.265437	-0.0420705	0.21661	-0.143484	0.14176	-0.0830954	25
Q9P0K1;F8WAD8	ADAM22	ADAM22	#N/A	#N/A	Disintegrin and metalloproteinase domain-containing protein 22	-0.486691	-0.305628	0.131063	-0.373159	0.152248	-0.343092	0.158078	-0.32858	0.141694	-0.358047	36
J3KR44;Q96FW1;F5GYN4;F5H6Q1;F5GYJ8	OTUB1	OTUB1	#N/A	#N/A	Ubiquitin thioesterase OTUB1	0.200002	0.0430645	0.0719	-0.00868222	0.208268	0.00992034	0.0889556	-0.0489792	0.141694	0.000649045	21
P30613	PKLR	PKLR	#N/A	#N/A	Pyruvate kinase PKLR			-0.193354	0.559247	0.413161	0.355242			0.141544	0.460847	5
O43809;H3BND3	NUDT21	NUDT21	#N/A	#N/A	Cleavage and polyadenylation specificity factor subunit 5	0.207643	0.293606	0.330673	0.307428	-0.0762499	-0.118946	0.130272	0.161436	0.141511	0.109935	19
P52209	PGD	PGD	#N/A	#N/A	6-phosphogluconate dehydrogenase, decarboxylating	0.213752	0.0100636	0.234011	0.146786	0.0422241	-0.0343967	0.0172092	0.00848693	0.141302	0.0590368	42
P51798;H0Y2M6	CLCN7	CLCN7	#N/A	#N/A	H(+)/Cl(-) exchange transporter 7	0.125916	-0.0372215	0.119821	-0.042234	0.16221	-0.00807279	0.121015	-0.295641	0.141171	-0.0250523	10
P78330;C9JBI3	PSPH	PSPH	#N/A	#N/A	Phosphoserine phosphatase	0.252052	0.167615	0.298776	0.32262	-0.0358306	-0.00447927	-0.103147	-0.0244285	0.141152	0.168321	16
Q5MIZ7	SMEK2	SMEK2	#N/A	#N/A	Serine/threonine-protein phosphatase 4 regulatory subunit 3B	-0.131171	-0.242908	0.181802	-0.0854814	0.09815	-0.0330676	-2.47041	-2.51598	0.140582	-0.0590365	10
Q9Y394;H0YJ66;H0YJR8	DHRS7	DHRS7	Predicted mitochondrial	#N/A	Dehydrogenase/reductase SDR family member 7	-0.138426	-0.135982	-0.0132177	-0.155888	0.279412	-0.0718457	0.0219061	-0.314428	0.140504	-0.113255	24
E9PDF6;O43795	MYO1B	MYO1B	#N/A	#N/A	Unconventional myosin-Ib	0.0122111	-0.185277	0.182311	-0.0599159	0.0962619	-0.0136983	0.116631	0.00719549	0.139928	-0.0366221	74
A0A499FIZ0;Q9H7D7;H0Y9R3	WDR26	WDR26	#N/A	#N/A	WD repeat-containing protein 26	0.0953169	0.178492	-0.0130285	-0.239413	0.278104	0.0104934	0.154454	-0.167475	0.139869	-0.109055	30
Q9BYJ9	YTHDF1	YTHDF1	#N/A	#N/A	YTH domain-containing family protein 1	0.198117	0.144568	0.104471	0.392867	0.174406	0.0738202	-0.0228593	0.135404	0.139862	0.242145	13
P22681;A0A1B0GW38;A0A0U1RQX8;A0A0U1RR39	CBL	CBL	#N/A	#N/A	E3 ubiquitin-protein ligase CBL	-0.0243992	0.165687	-0.183359	-0.167086	0.403049	-0.0714819	0.038998	-0.151122	0.139437	-0.118492	27
P30793	GCH1	GCH1	#N/A	#N/A	GTP cyclohydrolase 1	-0.238272	-0.11115	0.0612924	-0.242226	0.213129	-0.490902	0.081067	-0.683553	0.139208	-0.361213	14
Q6ZMZ3;G3V533	SYNE3	SYNE3	#N/A	#N/A	Nesprin-3	-0.132847	-0.222885	0.122209	-0.0525807	0.156008	-0.128835	0.198243	-0.0606832	0.139208	-0.0902039	29
P25786;F5GX11;B4DEV8	PSMA1	PSMA1	#N/A	#N/A	Proteasome subunit alpha type-1;Proteasome subunit alpha type	0.183963	0.107822	0.200128	0.00690831	0.0747794	-0.0702242	0.119954	-0.080454	0.138814	-0.0311425	25
Q9NXC5	MIOS	MIOS	#N/A	#N/A	WD repeat-containing protein mio	-0.0121699	0.0193461	0.0295589	0.132643	0.240253	0.0611541	0.0183493	-0.040304	0.138749	0.0973411	25
Q9NQG5	RPRD1B	RPRD1B	#N/A	#N/A	Regulation of nuclear pre-mRNA domain-containing protein 1B	0.189793	0.0881415	0.104202	0.0771063	0.171847	0.0750534	0.125651	0.0346383	0.138421	0.0760802	22
J3QS48;I3L295;J3KT75;J3QW43;J3QRD5;O75352;I3L1D2;J3KTK8;J3QQZ4;I3L405;I3L261	MPDU1	MPDU1	#N/A	#N/A	Mannose-P-dolichol utilization defect 1 protein	0.237319	-0.098691	0.208517	0.013355	0.0646069	-0.0654608	-0.00420439	0.0246034	0.138356	-0.0255147	5
Q6NSW5;Q8TCE6;A0A3B3IRE4	FAM45B;FAM45A	FAM45B	#N/A	#N/A	Protein FAM45B;Protein FAM45A	0.41446	0.0918014	0.23352	0.307662	0.0363276	0.016211	-0.154506	0.024036	0.13829	0.169284	8
P16333;C9JAB9	NCK1	NCK1	#N/A	#N/A	Cytoplasmic protein NCK1	0.0820213	-0.153479	-0.12268	-0.328761	0.358959	0.264476	0.158725	0.0119249	0.138146	-0.00186227	8
A0A0A0MSE7;Q86UA6;A0A0A0MR35	RPAIN	RPAIN	#N/A	#N/A	RPA-interacting protein	0.16877	0.16543	0.177854	0.0399806	0.0966667	-0.0923709	0.392867	-0.0788837	0.137831	-0.024678	6
A0A0G2JN29;A0A087X117;Q15155;A0A0G2JP90;A0A087WW46	NOMO1	NOMO1	Predicted mitochondrial	#N/A	Nodal modulator 1	0.111833	0.0542234	0.0576928	0.0538064	0.213752	-0.103333	-0.180757	-0.407842	0.137831	-0.0226248	50
Q96S44	TP53RK	TP53RK	#N/A	#N/A	TP53-regulating kinase	0.355242	0.1503	0.10165	0.107956	0.173128	0.109294	-0.0208965	-0.0194189	0.137831	0.108625	5
Q15311	RALBP1	RALBP1	#N/A	#N/A	RalA-binding protein 1	-0.226763	0.126973	0.433707	1.20864	-0.235688	0.00129789	0.0869197	-0.0914484	0.13749	0.727746	14
Q9BXK5;A0A087WX97;A0A087WTL4	BCL2L13	BCL2L13	Known mitochondrial	#N/A	Bcl-2-like protein 13	-0.492241	-0.290992	0.0617071	-0.00718809	0.209266	-0.289193	0.337197	-0.233142	0.137372	-0.141311	11
Q9BRG1;K7ENE3	VPS25	VPS25	#N/A	#N/A	Vacuolar protein-sorting-associated protein 25	0.352533	0.134484	0.272979	0.157044	-0.0123881	-0.182966	0.0123541	-0.0957124	0.13734	-0.00296777	16
P36405	ARL3	ARL3	#N/A	#N/A	ADP-ribosylation factor-like protein 3	0.454492	0.31603	-0.0113117	0.0662615	0.271904	0.0454429	0.171719	0.0781998	0.137235	0.0558898	16
Q9H553	ALG2	ALG2	#N/A	#N/A	Alpha-1,3/1,6-mannosyltransferase ALG2	-0.107555	-0.0262051	-0.0181182	-0.0871969	0.27739	0.0304067	0.232047	-0.294632	0.137189	-0.0271971	11
Q9BT09	CNPY3	CNPY3	#N/A	#N/A	Protein canopy homolog 3	-0.185737	-0.247149	0.00173014	-0.0513393	0.260869	-0.0558013	0.145743	-0.153414	0.13711	-0.0535686	17
P85037	FOXK1	FOXK1	#N/A	#N/A	Forkhead box protein K1	-0.0254707	-0.0394586	0.15069	-0.0618724	0.123136	0.10541	-0.0797525	-0.156225	0.136979	0.0241919	24
P26641	EEF1G	EEF1G	Predicted mitochondrial	#N/A	Elongation factor 1-gamma	0.165301	0.0606008	0.179129	0.0650208	0.093425	-0.034574	0.121546	0.016211	0.136913	0.0160827	29
Q9Y4I1;A0A087WY00;G3V394;F8WE88;F8W6H6	MYO5A	MYO5A	#N/A	#N/A	Unconventional myosin-Va	0.0193461	0.0927488	0.0496307	0.129876	0.219091	-0.0320199	0.267955	0.0779266	0.136848	0.0511981	47
D6RFI3;E7EQR8;Q9GZM5;D6RGY8	YIPF3	YIPF3	#N/A	#N/A	Protein YIPF3;Protein YIPF3, 36 kDa form III	-0.0845174	-0.113723	0.17479	-0.0371771	0.0976109	-0.195352	0.0648829	-0.0965452	0.136716	-0.114098	5
P51948;H0YJ92	MNAT1	MNAT1	#N/A	#N/A	CDK-activating kinase assembly factor MAT1	0.139993	-0.0247807	0.258097	0.131326	0.00403388	-0.132262	0.250962	0.0854246	0.136651	0.00554369	8
Q86TI2;M0R2A8	DPP9	DPP9	#N/A	#N/A	Dipeptidyl peptidase 9	0.249021	0.157303	0.249627	0.0852886	0.0139266	-0.0367627	0.0443242	0.0227584	0.136585	0.0255533	27
P50995	ANXA11	ANXA11	#N/A	#N/A	Annexin A11	0.0583859	-0.00372694	0.156655	-0.0252651	0.116232	-0.0855426	0.0472592	-0.00800024	0.136585	-0.0550891	24
Q92574;A0A2R8Y5S3;A0A2R8Y5N2;A0A2R8YFV7;A0A2R8Y6S1	TSC1	TSC1	#N/A	#N/A	Hamartin	-0.0178552	0.033793	0.064469	-0.0570764	0.204892	-0.00446486	-0.0934634	0.215119	0.136388	-0.0305308	13
Q92520	FAM3C	FAM3C	#N/A	#N/A	Protein FAM3C	-0.136315	-0.0605176	-0.0582026	0.0661237	0.307778	0.171207	-0.0119516	-0.00345221	0.136362	0.119622	9
P53367	ARFIP1	ARFIP1	#N/A	#N/A	Arfaptin-1	0.0597706	0.108759	0.102053	0.0829751	0.169797	-0.00324974	-0.0346036	-0.0414765	0.136323	0.0405067	13
A8MX75;P18074;K7EIT8;E7EVE9	ERCC2	ERCC2	#N/A	#N/A	TFIIH basal transcription factor complex helicase XPD subunit	-0.0262786	0.0436244	0.0824301	0.0440444	0.187641	-0.0936635	0.0695647	0.0214797	0.135994	-0.0231671	20
E5RJ52;P53677	AP3M2	AP3M2	#N/A	#N/A	AP-3 complex subunit mu-2			-0.023915	-0.0698455	0.279174	0.458907	0.274411	0.246469	0.135574	0.21862	8
Q9BPX5	ARPC5L	ARPC5L	#N/A	#N/A	Actin-related protein 2/3 complex subunit 5-like protein	0.143916	0.0139266	0.081067	-0.0734995	0.188021	-0.216099	-0.067062	-0.0350765	0.135535	-0.143038	8
Q6ULP2;B8ZZI9;A0A0A0MSN6	AFTPH	AFTPH	#N/A	#N/A	Aftiphilin	-0.134382	0.4336	-0.234431	0.412619	0.429536	0.0250289	0.431142	0.27608	0.135417	0.231801	7
A6NIH7	UNC119B	UNC119B	#N/A	#N/A	Protein unc-119 homolog B	0.458697	0.332507	0.237686	0.117695	0.024887	-0.0627913	-0.0874574	0.264957	0.135207	0.0302725	8
O60701	UGDH	UGDH	#N/A	#N/A	UDP-glucose 6-dehydrogenase	0.392317	0.0794293	0.394185	0.159371	-0.181411	-0.0459675	-0.090972	-0.0871356	0.134904	0.0603518	35
Q8N122	RPTOR	RPTOR	#N/A	#N/A	Regulatory-associated protein of mTOR	0.200379	0.0315363	0.0211954	-0.199636	0.239031	0.19862	0.0924781	-0.144744	0.134221	0.0131907	22
Q5JSL3;A6NIW2;A0A0J9YW64	DOCK11	DOCK11	#N/A	#N/A	Dedicator of cytokinesis protein 11	-0.413519	-0.138696	-0.100469	0.166073	0.335826	0.0640551	-0.0152575	-0.194741	0.134109	0.115965	19
A0A3B3ISV4			#N/A	#N/A		0.0936954	-0.0624598	0.0766959	0.0768327	0.189287	0.00331442	-0.0659138	-0.127557	0.134089	0.0405418	7
O15047	SETD1A	SETD1A	#N/A	#N/A	Histone-lysine N-methyltransferase SETD1A	-0.0406304	0.00532815	0.25181	0.0367495	0.00561564	-0.111602	0.206143	0.278104	0.133958	-0.03552	13
P35080;C9J712;C9J2N0	PFN2	PFN2	#N/A	#N/A	Profilin-2;Profilin	-0.0182788	0.289598	0.151469	0.249263	0.116232	0.0701146	-0.0976871	0.0335111	0.133958	0.162468	15
Q86U44	METTL3	METTL3	#N/A	#N/A	N6-adenosine-methyltransferase 70 kDa subunit	0.131458	0.10675	0.147567	0.0281448	0.120086	-0.0654759	-0.113177	-0.00910324	0.133892	-0.0179063	26
Q6P9B6;H3BM75;H3BUB0	TLDC1	TLDC1	#N/A	#N/A	TLD domain-containing protein 1	0.138028	-0.110573	-0.00466741	-0.00920483	0.260026	-0.0274544	0.260267	-0.0403486	0.133741	-0.0183008	8
A0A0U1RQK7			#N/A	#N/A		0.301939	0.167615	0.0712136	0.0164963	0.193583	0.00317045	0.203765	-0.0863542	0.133695	0.00984877	45
Q9ULK5	VANGL2	VANGL2	#N/A	#N/A	Vang-like protein 2	-0.293624	-0.105473	-0.112568	-0.540149	0.343919	-0.160363	0.219958	-0.202539	0.133656	-0.337795	10
A0A087WYM3;Q8IXJ6;A0A0A0MRF5;E7EWX6	SIRT2	SIRT2	#N/A	#N/A	NAD-dependent protein deacetylase sirtuin-2	0.0893625	0.0614305	0.196607	-0.00749258	0.0673633	-0.0978878	0.543397	0.24184	0.133432	-0.0519823	10
P53999	SUB1	SUB1	#N/A	#N/A	Activated RNA polymerase II transcriptional coactivator p15	0.191184	0.072586	0.177089	0.0268709	0.0880058	-0.00843551	-0.0642838	-0.0220388	0.133235	0.00932569	16
Q96C23;H7C320	GALM	GALM	#N/A	#N/A	Aldose 1-epimerase	0.393416	0.277271	0.194465	0.105812	0.0688772	-0.109297	-0.177262	-0.0841349	0.133037	0.00226323	10
O00401	WASL	WASL	#N/A	#N/A	Neural Wiskott-Aldrich syndrome protein	0.0840642	-0.0222145	0.118227	0.0563061	0.147697	-0.180054	0.126444	-0.187099	0.133037	-0.0570389	26
Q92945;A0A087WTP3;M0R0I5	KHSRP	KHSRP	#N/A	#N/A	Far upstream element-binding protein 2	0.115699	-0.00862417	0.178492	0.0197731	0.0859685	-0.00364022	0.16633	0.107018	0.132972	0.00811394	49
Q9BRL6	SRSF8	SRSF8	#N/A	#N/A	Serine/arginine-rich splicing factor 8	0.10044	0.0688772	0.128425	0.170053	0.136848	0.437441			0.132643	0.309933	7
P50747	HLCS	HLCS	#N/A	#N/A	Biotin--protein ligase;Biotin--[methylmalonyl-CoA-carboxytransferase] ligase;Biotin--[propionyl-CoA-carboxylase [ATP-hydrolyzing]] ligase;Biotin--[methylcrotonoyl-CoA-carboxylase] ligase;Biotin--[acetyl-CoA-carboxylase] ligase	0.118094	0.0706641	0.0790197	0.205393	0.184217	0.00992034	-0.0671527	-0.507132	0.132577	0.110964	10
O00442	RTCA	RTCA	#N/A	#N/A	RNA 3-terminal phosphate cyclase	0.179893	0.0554733	-0.105163	-0.10698	0.336626	-0.0157679	0.0492126	-0.291928	0.132577	-0.060653	20
Q8WUM4	PDCD6IP	PDCD6IP	#N/A	#N/A	Programmed cell death 6-interacting protein	0.132511	0.0589399	0.156008	0.0405417	0.108759	-0.0123299	-0.0209551	0.0363276	0.132577	0.0143481	75
A0A0A0MRE5;Q9ULH1;H0YBF7	ASAP1	ASAP1	#N/A	#N/A	Arf-GAP with SH3 domain, ANK repeat and PH domain-containing protein 1	0.152118	0.148869	0.0136409	0.0779266	0.24245	0.157949	0.20389	-0.163833	0.132577	0.118493	15
F8VSL3;P25208	NFYB	NFYB	#N/A	#N/A	Nuclear transcription factor Y subunit beta	0.130799	0.237808	0.0312541	0.0234683	0.227125	0.322274	0.325732	0.710702	0.132511	0.180593	6
C9JCC6;Q14919;E9PNC7;E9PQX9	DRAP1	DRAP1	#N/A	#N/A	Dr1-associated corepressor	0.169668	0.115699	0.0126402	-0.189121	0.243182	-0.0911717	0.130667	-0.121173	0.132511	-0.139315	11
Q14376;Q5QPP4;Q5QPP3;Q5QPP1	GALE	GALE	#N/A	#N/A	UDP-glucose 4-epimerase	0.135141	0.0139266	-0.156193	0.0611541	0.372952	-0.026161	0.276794	-0.333116	0.132504	0.018157	20
Q68EM7	ARHGAP17	ARHGAP17	#N/A	#N/A	Rho GTPase-activating protein 17	0.180275	0.088413	0.0773797	-0.0526705	0.185486	-0.03934	0.123931	0.123931	0.132445	-0.0459898	26
P51149;C9J592;C9J8S3;C9IZZ0;C9J4V0	RAB7A	RAB7A	Predicted mitochondrial	#N/A	Ras-related protein Rab-7a	0.0951818	-0.041922	0.0935602	-0.0393697	0.170053	-0.0540028	0.102188	-0.10953	0.132314	-0.0466677	19
Q93008	USP9X	USP9X	#N/A	#N/A	Probable ubiquitin carboxyl-terminal hydrolase FAF-X	0.138683	-0.00904517	0.0538064	-0.0830648	0.206768	-0.0145432	0.0648829	-0.0641179	0.132314	-0.0483973	99
Q9Y6D5	ARFGEF2	ARFGEF2	#N/A	#N/A	Brefeldin A-inhibited guanine nucleotide-exchange protein 2	0.625364	0.147567	0.133169	0.2949	0.131194		0.173767	-0.132894	0.132182		25
O95782	AP2A1	AP2A1	#N/A	#N/A	AP-2 complex subunit alpha-1	-0.019492	-0.000808115	0.0387171	-0.0464889	0.219463	-0.0803014	0.217975	-0.196475	0.131919	-0.0632961	51
P45985	MAP2K4	MAP2K4	#N/A	#N/A	Dual specificity mitogen-activated protein kinase kinase 4	0.347212	0.164786	0.100036	0.0316775	0.162597	0.148479	0.237686	0.132379	0.131655	0.0912597	21
A6NML8;K4DI95;C9J6U3;O60879	DIAPH2	DIAPH2	#N/A	#N/A	Protein diaphanous homolog 2	-0.043081	-0.19798	-0.0963446	-0.166211	0.328492	0.21661	0.0223323	-0.268139	0.131655	0.0378601	9
P12814;H9KV75	ACTN1	ACTN1	Predicted mitochondrial	#N/A	Alpha-actinin-1	-0.0126064	-0.0828509	0.117961	-0.0529698	0.14483	-0.0881934	0.18954	-0.102032	0.131458	-0.0704741	84
Q08AG7	MZT1	MZT1	#N/A	#N/A	Mitotic-spindle organizing protein 1	0.44615	0.218099	0.122739	0.0900404	0.139601	0.103531	-0.176495	0.0912597	0.131194	0.0968015	4
O60476;H0Y7H1	MAN1A2	MAN1A2	#N/A	#N/A	Mannosyl-oligosaccharide 1,2-alpha-mannosidase IB;alpha-1,2-Mannosidase	0.220454	0.141825	0.27739	0.429536	-0.0315331	-0.0167309	0.0437644	0.00532815	0.131181	0.223589	11
O43374;C9J798;F5GXT2;E7ERK1;F8W6L0	RASA4;RASA4B	RASA4	#N/A	#N/A	Ras GTPase-activating protein 4;Putative Ras GTPase-activating protein 4B	-0.148721	-0.434656	0.403813	-0.28847	-0.205863	-0.355405	-0.0344706	-0.343806	0.130944	-0.321549	27
P82663;E7EPW2	MRPS25	MRPS25	Known mitochondrial	#N/A	28S ribosomal protein S25, mitochondrial	-0.440694	-0.034707	0.22132	0.365469	0.0343565	-0.287307	-0.0187027	0.0142124	0.130865	0.0756901	10
Q9UEU0	VTI1B	VTI1B	#N/A	#N/A	Vesicle transport through interaction with t-SNAREs homolog 1B	-0.0111081	-0.188381	0.122209	-0.0660347	0.139077	0.0427844	0.0057592	-0.131582	0.130667	-0.0105994	12
P20338	RAB4A	RAB4A	#N/A	#N/A	Ras-related protein Rab-4A	-0.145653	0.0328061	0.054779	0.133037	0.202637	0.298424	-0.164318	0.256286	0.130601	0.218099	12
Q10567;C9J1E7	AP1B1	AP1B1	#N/A	#N/A	AP-1 complex subunit beta-1	0.1129	0.00705191	0.10541	0.0082	0.155361	0.0344974	0.160533	0.0106367	0.130601	0.0214086	70
P09110;C9JDE9;H7C131	ACAA1	ACAA1	Predicted mitochondrial	Peroxisomedb	3-ketoacyl-CoA thiolase, peroxisomal	0.309642	-0.012621	0.0915306	0.0460021	0.168514	0.000144286	0.504671	0.0950467	0.130536	0.0232554	13
P68036;A0A1B0GUS4	UBE2L3	UBE2L3	#N/A	#N/A	Ubiquitin-conjugating enzyme E2 L3	0.154583	0.0720372	0.261952	0.0965318	-0.0141644	-0.107881	-0.0404672	-0.0550816	0.130489	-0.00205726	16
A0A2R8YF87;Q96AX1;H3BMM5	VPS33A	VPS33A	#N/A	#N/A	Vacuolar protein sorting-associated protein 33A	0.112767	0.183582	0.0575542	-0.110994	0.199876	-0.0207209	0.115566	-0.0644045	0.13047	-0.0651514	23
Q5SWX3;A0A2Q3DQE3;Q13555;Q8WU40;H7BXS4;Q13554;H0Y6G2	CAMK2G;CAMK2B	CAMK2G	#N/A	#N/A	Calcium/calmodulin-dependent protein kinase type II subunit gamma;Calcium/calmodulin-dependent protein kinase type II subunit beta	0.216113	0.0740944	-0.126691	-0.0183226	0.348232	0.0824301	0.247442	0.0820213	0.130226	0.0329331	12
A0A2R8YFH5;Q15437	SEC23B	SEC23B	#N/A	#N/A	Protein transport protein Sec23B	0.230818	0.0439044	0.0862402	0.0130691	0.172872	0.0539454	0.0511633	-0.00965501	0.130206	0.033652	42
Q5TGZ0;A0A087WU07;R4GNA1;R4GMY4	MINOS1;MINOS1-NBL1	MINOS1	Known mitochondrial	#N/A	MICOS complex subunit MIC10	-0.767364	-0.0686044	0.0295589	0.289126	0.224164	0.241962	0.146786	0.0291349	0.13014	0.265737	4
Q9Y333	LSM2	LSM2	#N/A	#N/A	U6 snRNA-associated Sm-like protein LSm2	0.640343	0.407951	0.277032	0.401303	-0.0334366	-0.217088	0.00647761	-0.0324182	0.130134	0.12499	8
P23528;G3V1A4;E9PP50;E9PK25;E9PQB7	CFL1	CFL1	#N/A	#N/A	Cofilin-1	0.191942	0.105812	0.122209	0.0574155	0.137897	-0.0425756	0.101112	0.0492126	0.130074	0.00828606	33
Q96NB3	ZNF830	ZNF830	#N/A	#N/A	Zinc finger protein 830	0.174279	-0.0937097	0.265317	0.153416	-0.0192435	0.135141	0.140255	0.203139	0.130041	0.144307	8
Q9Y4K4	MAP4K5	MAP4K5	#N/A	#N/A	Mitogen-activated protein kinase kinase kinase kinase 5	0.224905	-0.062746	0.0639171	-0.140523	0.192699	0.146134	0.0607391	-0.0973939	0.129745	0.0099133	12
P31947	SFN	SFN	#N/A	#N/A	14-3-3 protein sigma	-0.243147	-0.0804387	0.0468402	-0.0586232	0.207768	0.0333701	0.135404	0.0302654	0.129547	-0.0118935	7
E9PPJ5;E9PLM6;P21741	MDK	MDK	#N/A	#N/A	Midkine	-0.627449	-0.155293	-0.0832941	-0.189384	0.31487	-0.168382	0.550507	-0.393274	0.129481	-0.178845	12
Q86UE8	TLK2	TLK2	#N/A	#N/A	Serine/threonine-protein kinase tousled-like 2	0.0540844	0.179001	-0.117913	-0.0954196	0.339935	0.0143553	-0.313334	0.258217	0.129098	-0.0394883	19
A0A087WVQ6;Q00610	CLTC	CLTC	Predicted mitochondrial	#N/A	Clathrin heavy chain;Clathrin heavy chain 1	0.162983	0.014641	0.0384361	-0.0238124	0.214374	0.0112093	0.100036	-0.0492628	0.129085	-0.00619524	146
D6RHI9;O00584;D6REQ6;A0A087WZM2;H0YAE9	RNASET2	RNASET2	#N/A	#N/A	Ribonuclease T2	-0.265223	-0.0961751	-0.11857	-0.27282	0.340277	-0.305628	0.154972	-0.522406	0.129019	-0.289131	10
P78368;K7ESB6	CSNK1G2	CSNK1G2	#N/A	#N/A	Casein kinase I isoform gamma-2	-0.0400963	0.0710762	0.120219	0.0226164	0.13711	0.199625	0.234133	-0.0401111	0.128689	0.113834	6
P46109	CRKL	CRKL	#N/A	#N/A	Crk-like protein	0.138028	0.0690147	-0.0561612	-0.0195505	0.292311	0.0589399	0.033652	-0.0684834	0.128571	0.0202284	17
P35270	SPR	SPR	Predicted mitochondrial	#N/A	Sepiapterin reductase	0.279174	0.065848	0.260869	0.0690147	-0.0172418	-0.110386	0.0905825	-0.108394	0.128505	-0.017899	15
P30520	ADSS	ADSS	#N/A	#N/A	Adenylosuccinate synthetase isozyme 2	0.313942	0.139601	0.341758	0.140779	-0.122067	-0.00351005	-0.0290138	0.160404	0.128406	0.0704374	30
J3QT87;Q96SW2;A0A1W2PPJ5	CRBN	CRBN	#N/A	#N/A	Protein cereblon	0.393636	0.311619	0.196733	0.0747794	0.0565835	0.0422241	-0.0545121	-0.024003	0.128359	0.0585936	8
Q9UBW8;F5GYF7;F5H248;F5H7C6;F5H4U8	COPS7A	COPS7A	#N/A	#N/A	COP9 signalosome complex subunit 7a	0.105678	-0.161669	0.183709	0.195977	0.0705267	-0.0337172	-0.143596	0.117961	0.128227	0.0856965	14
Q6PL24	TMED8	TMED8	#N/A	#N/A	Protein TMED8	0.0060466	-0.0173441	-0.26986	-0.112522	0.439783	0.0871912			0.128161	-0.00921215	7
Q96EQ0;D6RFW1	SGTB	SGTB	#N/A	#N/A	Small glutamine-rich tetratricopeptide repeat-containing protein beta	0.0980152	0.153287	-0.0207063	0.109695	0.263034	-0.202074	0.485015	-0.218615	0.128128	-0.0377842	5
P13010	XRCC5	XRCC5	#N/A	#N/A	X-ray repair cross-complementing protein 5	0.163241	0.0871912	0.0973411	0.0458623	0.158208	0.0368901	0.0274371	0.0295589	0.128095	0.0413832	68
O15498	YKT6	YKT6	#N/A	#N/A	Synaptobrevin homolog YKT6	-0.0700879	-0.0485167	0.156397	-0.0228447	0.0989585	-0.0310614	-0.143468	-0.0738639	0.127963	-0.0269472	20
Q9P2R3	ANKFY1	ANKFY1	#N/A	#N/A	Rabankyrin-5	0.0197731	0.0697021	0.0485151	-0.0207063	0.203139	0.0941009	0.249506	0.0751904	0.127897	0.037839	31
A0A3B3ITK4;Q96LA8	PRMT6	PRMT6	#N/A	#N/A	Protein arginine N-methyltransferase 6	0.474047	0.120352	0.228973	0.14991	0.0187766	0.94875	0.1145	-0.389187	0.127699	0.603929	8
F5H5N1;F5GXJ1;O75251;A0A087WXF6;A0A087WTI3	NDUFS7	NDUFS7	Known mitochondrial	#N/A	NADH dehydrogenase [ubiquinone] iron-sulfur protein 7, mitochondrial	-0.58085	0.153287	-0.245797	-0.228943	0.423955	-0.164723	0.0875986	0.0487942	0.1276	-0.196475	7
Q9BS26	ERP44	ERP44	#N/A	#N/A	Endoplasmic reticulum resident protein 44	0.0467006	-0.0636353	-0.0319461	-0.0415211	0.271187	-0.0380211	0.00705191	-0.259824	0.127567	-0.03977	26
O60551;Q5VUC6	NMT2	NMT2	#N/A	#N/A	Glycylpeptide N-tetradecanoyltransferase 2;Glycylpeptide N-tetradecanoyltransferase	0.40174	-0.00387162	0.283329	0.40021	-0.0473832	-0.159492	-0.557752	-0.346481	0.127429	0.147333	14
P56192	MARS	MARS	#N/A	#N/A	Methionine--tRNA ligase, cytoplasmic	0.14483	0.0517201	0.128161	-0.00810176	0.126312	0.0199154	0.0295589	-0.0619326	0.127237	0.00597484	44
Q6PK18;J3QRG1	OGFOD3	OGFOD3	#N/A	#N/A	2-oxoglutarate and iron-dependent oxygenase domain-containing protein 3	-0.113068	-0.162121	0.178109	-0.305093	0.0743684	-0.162638	0.116764	-0.125903	0.127171	-0.232108	10
Q9NWY4	C4orf27	C4orf27	#N/A	#N/A	UPF0609 protein C4orf27	0.450274	0.203765	0.15043	0.100036	0.103531	0.0467006	0.0848807	-0.0193166	0.127171	0.0736146	20
A0A0A0MSA9;A0A0C4DG49;P15151	PVR	PVR	#N/A	#N/A	Poliovirus receptor	-0.183638	-0.0496063	0.03492	-0.0885308	0.213752	-0.114707	0.116897	-0.0932479	0.127105	-0.101559	6
C9JJV1;Q9Y5U2;A6NCC9;E9PME3;C9JHT9	TSSC4	TSSC4	#N/A	#N/A	Protein TSSC4	0.359859	0.256769	0.218099	0.224781	0.0297002	0.0958569	0.286408	0.207643	0.126973	0.161759	6
Q8TDW0	LRRC8C	LRRC8C	#N/A	#N/A	Volume-regulated anion channel subunit LRRC8C	0.0816123	-0.189532	0.0558898	-0.370191	0.194717	0.044464	0.0659859	-0.163494	0.126973	-0.148017	21
Q8IUR7;B7Z637;G5E9V6;G5E9V7;C9J2I1	ARMC8	ARMC8	#N/A	#N/A	Armadillo repeat-containing protein 8	0.0978804	0.0985544	0.0633648	-0.0996181	0.187514	0.0190613	0.172359	-0.0109046	0.126775	-0.0390584	16
Q9UKK6	NXT1	NXT1	#N/A	#N/A	NTF2-related export protein 1	0.125122	0.208392	0.0784732	0.257976	0.173128	0.065848	0.281431	0.224164	0.126576	0.165108	4
Q8IWJ2;B8ZZW2	GCC2	GCC2	#N/A	#N/A	GRIP and coiled-coil domain-containing protein 2	-0.291857	0.130667	-0.0922017	-0.0599159	0.316493	0.220825	-0.559473	-0.732596	0.12657	0.0872728	9
Q4VC31;C9JQ41;H7C525	CCDC58	CCDC58	Known mitochondrial	#N/A	Coiled-coil domain-containing protein 58	-0.39684	-0.0382137	0.261832	0.20063	-0.0233724	0.0712136	0.116365	-0.0550666	0.126266	0.137372	8
Q96QG7	MTMR9	MTMR9	#N/A	#N/A	Myotubularin-related protein 9	0.418784	-0.0148202	-0.0109046	-0.028175	0.251446	0.0224743	0.0465608	0.147437	0.126226	-0.00262809	11
Q8N9N2;H0YCB3;H0YE76;E9PR40	ASCC1	ASCC1	#N/A	#N/A	Activating signal cointegrator 1 complex subunit 1	0.404249	-0.0480244	0.419647	0.0691523	-0.243199	-0.399121	0.121811	0.0471196	0.125962	-0.146068	10
E7EW77;A0A0C4DG21;F8WAL6;Q9NYB9;E7EP65;E9PEZ7	ABI2	ABI2	#N/A	#N/A	Abl interactor 2	-0.00093804	0.0177795	0.121413	0.0183493	0.130404	-0.0558162	0.119024	-0.00283043	0.125916	-0.0182569	20
Q9UJC5	SH3BGRL2	SH3BGRL2	#N/A	#N/A	SH3 domain-binding glutamic acid-rich-like protein 2	0.134352	-0.293713	0.0717627	-0.0407343	0.177854	0.000144286	0.0368901	0.052555	0.125783	-0.0201502	2
P52788;H7C2R7	SMS	SMS	#N/A	#N/A	Spermine synthase	0.189793	0.126841	-0.0521319	-0.057737	0.28404	0.0416635	0.217975	0.00748262	0.125724	-0.00718083	23
O43617;A0A087WWM0;A0A087WYS5;A6NKE1	TRAPPC3	TRAPPC3	#N/A	#N/A	Trafficking protein particle complex subunit 3	0.00992034	0.10044	0.0803847	0.0890913	0.169284	-0.0154034	-0.0179283	0.0522768	0.125519	0.0377898	6
O95363;A0A3B3ITR6	FARS2	FARS2	Known mitochondrial	#N/A	Phenylalanine--tRNA ligase, mitochondrial	-0.444223	-0.297254	0.363003	-0.48461	-0.159041	-0.151715	0.0661237	-0.347252	0.125466	-0.308582	8
Q13425;H0YCS0	SNTB2	SNTB2	#N/A	#N/A	Beta-2-syntrophin	-0.0997727	-0.0718003	0.0309717	-0.197782	0.214125	-0.101025	0.0216219	0.00417777	0.125453	-0.148593	10
Q9Y2A7	NCKAP1	NCKAP1	#N/A	#N/A	Nck-associated protein 1	0.0647449	0.0621218	0.0836559	0.0346383	0.166073	-0.00300396	0.0769695	-0.106141	0.125453	0.0159399	58
E7EWC2;F5H7S7;Q13576	IQGAP2	IQGAP2	#N/A	#N/A	Ras GTPase-activating-like protein IQGAP2	-0.294544	0.3667	0.289126	0.106884	-0.059495	0.15017			0.12532	0.128689	5
O94967;A0A0A0MRE6	WDR47	WDR47	#N/A	#N/A	WD repeat-containing protein 47	0.0919367	0.0871912	-0.0112681	-0.137314	0.24987	0.23217	0.278698	-0.0355349	0.125201	0.0592238	14
Q5TGY3	AHDC1	AHDC1	#N/A	#N/A	AT-hook DNA-binding motif-containing protein 1	-0.434403	0.157432	0.346304	0.234992	-0.136299	-0.0404227	0.283803	0.0574155	0.125089	0.103847	12
P61981	YWHAG	YWHAG	#N/A	#N/A	14-3-3 protein gamma;14-3-3 protein gamma, N-terminally processed	0.149129	0.0668125	0.0339339	-0.0613454	0.210638	0.0193461	0.108759	0.0144981	0.12499	-0.0204356	31
P55011;G3XAL9	SLC12A2	SLC12A2	#N/A	#N/A	Solute carrier family 12 member 2	0.457121	0.371838	0.300299	-0.0368219	-0.074669	-0.08982	-0.0438392	-0.128062	0.124963	-0.0630776	12
O43159;E9PPY3	RRP8	RRP8	#N/A	#N/A	Ribosomal RNA-processing protein 8	0.121944	-0.107741	0.228111	0.0316775	0.0137839	-0.0325362	-0.0291169	-0.0230499	0.124924	-7.21482e-05	17
O14656;A0A494BZT7	TOR1A	TOR1A	#N/A	#N/A	Torsin-1A	0.0352017	-0.061526	0.1141	-0.0151701	0.135404	0.0060466	0.0928839	-0.0577821	0.124791	-0.00452274	16
A0A0C4DGR1;B4DHA8;M0QY66;Q9BZC1	CELF4	CELF4	#N/A	#N/A	CUGBP Elav-like family member 4	-0.0841197	0.0247452	-0.0123008	0.504976	0.249749	0.0119249	0.173128	-0.189861	0.124666	0.279412	6
Q8TBC4;F8W8D4	UBA3	UBA3	#N/A	#N/A	NEDD8-activating enzyme E1 catalytic subunit	0.115166	0.0301242	0.181039	0.189413	0.0659859	-0.0481437	-0.0531344	-0.0418032	0.124659	0.075519	31
A0A087X1X7;E9PRY8	EEF1D	EEF1D	#N/A	#N/A		0.116631	0.0799754	0.186754	0.00518438	0.0596321	0.0354831	-0.00517408	0.063641	0.124593	0.0204133	35
Q712K3	UBE2R2	UBE2R2	#N/A	#N/A	Ubiquitin-conjugating enzyme E2 R2	0.0207689	0.177599	0.104605	0.15017	0.143916	-0.0101053	-0.379977	-0.0136837	0.124394	0.0722567	8
Q15642;M0R2H7;M0R0F9	TRIP10	TRIP10	#N/A	#N/A	Cdc42-interacting protein 4	0.302875	0.109427	0.0866479	-0.0197261	0.161049	-0.151538	0.141433	-0.093171	0.124328	-0.0841273	17
Q96AT9;C9J9T0;C9IZU8;C9J6A7	RPE	RPE	#N/A	#N/A	Ribulose-phosphate 3-epimerase	0.19862	-0.219421	0.178874	0.224164	0.0673633	-0.0232697	0.0476779	-0.0639068	0.124196	0.105745	7
Q16774;B1ANH5;B1ANH6	GUK1	GUK1	Known mitochondrial	#N/A	Guanylate kinase	-0.147074	-0.0108174	0.0713507	-0.181804	0.174406	-0.170946	0.237319	-0.139236	0.123799	-0.176365	12
Q9Y5S2	CDC42BPB	CDC42BPB	#N/A	#N/A	Serine/threonine-protein kinase MRCK beta	0.0597706	-0.101366	-0.110199	-0.233057	0.32458	-0.130208	0.207143	-0.376114	0.123507	-0.180716	66
P35222;A0A2R8YCH5;A0A2R8Y543;A0A2R8Y5A3;A0A2R8Y804;B4DGU4;A0A2R8Y750;A0A2R8Y7Z0;A0A2R8Y5C3;A0A2R8Y5Z1;A0A2R8Y6G0	CTNNB1	CTNNB1	#N/A	#N/A	Catenin beta-1	-0.220715	-0.231329	-0.0120534	-0.181215	0.246955	-0.0254707	0.289716	-0.111072	0.123256	-0.101242	36
H0YMV8;Q71UM5;C9JLI6	RPS27L	RPS27L	#N/A	#N/A	40S ribosomal protein S27;40S ribosomal protein S27-like	-0.150145	-0.0266165	0.123136	0.450908	0.123269	-0.167604	-0.29343	-0.266125	0.123203	0.174547	7
A0A1B0GUI1;Q6GYQ0;H0YJB5	RALGAPA1	RALGAPA1	#N/A	#N/A	Ral GTPase-activating protein subunit alpha-1	0.0277203	0.0486547	0.0219061	-0.151586	0.217603	-0.0835692	0.157432	-0.185327	0.12307	-0.117177	29
P47985;P0C7P4	UQCRFS1;UQCRFS1P1	UQCRFS1	Known mitochondrial	#N/A	Cytochrome b-c1 complex subunit Rieske, mitochondrial;Cytochrome b-c1 complex subunit 11;Putative cytochrome b-c1 complex subunit Rieske-like protein 1	-0.108892	0.067088	0.0184917	-0.0467869	0.220206	-0.131803	0.42094	-0.0465783	0.122871	-0.0886689	10
Q99436	PSMB7	PSMB7	#N/A	#N/A	Proteasome subunit beta type-7	0.113034	0.0496307	0.201508	-0.0266899	0.038998	0.00690831	-0.12133	-0.0520272	0.12254	-0.00979301	13
Q7L576;A0A0G2JR96;A0A0G2JQT1	CYFIP1	CYFIP1	#N/A	#N/A	Cytoplasmic FMR1-interacting protein 1	0.100036	-0.00659373	0.0880058	0.0465608	0.156138	0.0308304	0.00590291	-0.0612099	0.122474	0.0387171	68
P34949;H3BPB8;F5GX71;H3BP57;H3BUZ9;H3BMZ9;H3BPP3;H3BT48	MPI	MPI	#N/A	#N/A	Mannose-6-phosphate isomerase	0.104337	-0.0365998	-0.0725435	-0.225245	0.294194	-0.135982	0.181548	-0.440988	0.122447	-0.179923	16
Q02127;I3NI32;J3QRQ3;I3L449	DHODH	DHODH	Known mitochondrial	#N/A	Dihydroorotate dehydrogenase (quinone), mitochondrial	-0.323353	-0.0559062	0.163885	0.453122	0.0797024	0.106214	0.0918014	0.0306892	0.122408	0.29007	12
Q9HCD6;J3KRP9	TANC2	TANC2	Predicted mitochondrial	#N/A	Protein TANC2	-0.0892213	-0.044107	-0.233719	-0.123968	0.407733	-0.119902	0.444455	-0.385997	0.122368	-0.121934	31
Q9UNF1;Q5H909;Q5H907	MAGED2	MAGED2	#N/A	#N/A	Melanoma-associated antigen D2	0.264116	0.108491	0.106482	-0.0393993	0.137766	0.0650208	0.17594	-0.10611	0.122209	0.0137553	39
C9JNE2;Q9Y530;C9J5P1;C9JXC3;C9JA90;C9IZY1	OARD1	OARD1	#N/A	#N/A	O-acetyl-ADP-ribose deacetylase 1	0.249749	-0.0900964	0.133037	-0.131851	0.110898	-0.0315774	0.443076	-0.418793	0.12201	-0.080843	6
O15145;C9JZD1	ARPC3	ARPC3	#N/A	#N/A	Actin-related protein 2/3 complex subunit 3	0.0538064	0.0448837	0.0795658	-0.0677271	0.163241	-0.048636	0.00403388	-0.139506	0.12201	-0.05815	15
Q9H871	RMND5A	RMND5A	#N/A	#N/A	Protein RMD5 homolog A	-0.0802557	0.0177795	0.103665	0.062398	0.140124	-0.141271	0.088413	-0.0865686	0.12201	-0.0358454	9
P61224;E7ESV4;F5H7Y6;F5GX62;A6NIZ1;F5H004;F5H6R7;F5GYB5	RAP1B	RAP1B	Predicted mitochondrial	#N/A	Ras-related protein Rap-1b;Ras-related protein Rap-1b-like protein	-0.222094	-0.162961	0.0097772	-0.0392956	0.226015	-0.03292	0.0835197	-0.197186	0.121944	-0.0361042	17
Q5QJ74;A0A2R8YFB7	TBCEL	TBCEL	#N/A	#N/A	Tubulin-specific chaperone cofactor E-like protein	0.247442	0.503857	0.0206267	0.141171	0.216486	0.132774	0.187514	0.0404014	0.121877	0.136979	11
A0A494C1L5;P50851;E9PEM5;A0A494BZW2;H0YAC6;A0A494C0R9	LRBA	LRBA	#N/A	#N/A	Lipopolysaccharide-responsive and beige-like anchor protein	0.298072	0.104202	0.177727	-0.458604	0.0635029	-0.071588	0.15082	-0.0342637	0.121745	-0.252157	37
Q8TAT6	NPLOC4	NPLOC4	#N/A	#N/A	Nuclear protein localization protein 4 homolog	0.0492126	0.0514416	0.123666	0.0740944	0.119821	-0.0224636	0.165815	0.063779	0.121745	0.0266231	32
Q76FK4;F8WE42;F5H101;F5GWN9	NOL8	NOL8	#N/A	#N/A	Nucleolar protein 8	0.363115	-0.25226	0.298893	-0.436822	-0.0803625	0.369718	0.664392	2.01952	0.121692	0.0220908	12
F5GXE4;B4E107;H0Y5C2;O95260;B4DK25	ATE1	ATE1	#N/A	#N/A	Arginyl-tRNA--protein transferase 1	0.1644	-0.0554263	-0.137077	-0.253412	0.339707	-0.0222731	0.262914	-0.149649	0.120923	-0.133219	12
Q9BUR4;E9PMG4	WRAP53	WRAP53	#N/A	#N/A	Telomerase Cajal body protein 1	-0.0894822	0.113167	0.295135	0.532965	-0.0772693	0.392977	0.0750534	0.343919	0.120916	0.464668	9
Q9NX05;F8W881	FAM120C	FAM120C	#N/A	#N/A	Constitutive coactivator of PPAR-gamma-like protein 2	0.0339339	-0.0397404	0.000144286	0.632268	0.232292	-0.00655027	0.285698	0.166844	0.120883	0.347932	16
Q6P6C2	ALKBH5	ALKBH5	#N/A	#N/A	RNA demethylase ALKBH5	0.121546	-0.160443	0.0250289	-0.281141	0.210514	0.0227584	0.214249	0.0274371	0.12075	-0.121204	19
P08574	CYC1	CYC1	Known mitochondrial	#N/A	Cytochrome c1, heme protein, mitochondrial	-0.142337	-0.0418329	0.00273846	-0.0899582	0.229711	0.0209111	0.448055	-0.03623	0.120684	-0.0334588	11
Q13190;E9PNU4;H7C3X5	STX5	STX5	#N/A	#N/A	Syntaxin-5	-0.0247807	0.225152	0.0315363	-0.31802	0.204642	-0.0359933	-0.101459	-0.128898	0.120684	-0.170126	11
Q86VP6;A0A0C4DGH5	CAND1	CAND1	#N/A	#N/A	Cullin-associated NEDD8-dissociated protein 1	0.0935602	0.0184917	0.163241	0.0540844	0.0764222	-0.0134508	-0.0683169	0.0136409	0.120485	0.020712	81
Q14554	PDIA5	PDIA5	#N/A	#N/A	Protein disulfide-isomerase A5	-0.557709	-0.138394	-0.161637	-0.0172418	0.356257	-0.065159	-0.0221999	-0.363085	0.120425	-0.0410015	16
O75746	SLC25A12	SLC25A12	Known mitochondrial	#N/A	Calcium-binding mitochondrial carrier protein Aralar1	-0.17909	-0.31328	-0.0841961	-0.192975	0.298893	-0.0844103	0.356257	-0.182999	0.120027	-0.137672	27
P32119;A6NIW5	PRDX2	PRDX2	Predicted mitochondrial	#N/A	Peroxiredoxin-2	0.132643	0.218719	0.192573	0.187388	0.0436244	-0.0222731	-0.12688	0.0278618	0.12002	0.0863626	21
E9PS17;E9PK59;Q96KG9;E9PPN3	SCYL1	SCYL1	#N/A	#N/A	N-terminal kinase-like protein	0.149129	-0.0625954	0.0302654	-4.32543e-05	0.204141	0.0275787	0.0430645	-0.0501887	0.119821	0.0138338	20
P50395;Q5SX87	GDI2	GDI2	#N/A	#N/A	Rab GDP dissociation inhibitor beta	0.122474	0.0731348	0.237931	0.188781	-0.00885646	-0.0202819	0.028852	0.052555	0.119808	0.088033	56
Q92542;H0Y3Z4;Q5T205;H0Y6T7	NCSTN	NCSTN	#N/A	#N/A	Nicastrin	-0.296191	-0.247817	0.122209	-0.113099	0.117296	-0.0974247	0.193456	-0.0375768	0.119755	-0.10524	10
A0A3F2YNW8;A0A3B3IU04;Q14643;A0A3B3ITU8;A0A3B3ITQ1;A0A3B3IU05;A0A3B3IU13	ITPR1	ITPR1	#N/A	#N/A	Inositol 1,4,5-trisphosphate receptor type 1	-0.0262638	-0.166924	0.146916	-0.0664274	0.091666	-0.0603522	-0.0817359	-0.327873	0.119555	-0.0633866	96
A0A0C4DFM1;Q92544	TM9SF4	TM9SF4	Predicted mitochondrial	#N/A	Transmembrane 9 superfamily member 4	-0.110371	-0.0465932	-0.0205307	-0.12191	0.247198	0.0712136	0.20201	0.0346383	0.119535	-0.0221193	18
Q13619;A0A0A0MR50	CUL4A	CUL4A	#N/A	#N/A	Cullin-4A	-0.0574518	0.00360232	0.0207689	0.0514416	0.211884	0.0110662	0.0176369	0.10165	0.119489	0.0313951	36
P11171;A0A2R8YD30;Q4VB86;A0A2U3TZH6;A0A2R8Y7Y3;A0A2R8Y5Z6;A0A2R8Y5G2;A0A3B3ITP0;A0A2R8Y420;A0A2R8YCW8;A0A3B3IU06;A0A2R8Y570;A0A2R8Y6G5;A0A2R8YFR9;A0A2R8Y6D0;A0A2R8Y7N0;A0A3B3IUD6	EPB41	EPB41	#N/A	#N/A	Protein 4.1	-0.0983047	-0.119087	0.170181	0.024036	0.0662615	-0.0158409	0.038998	-0.128393	0.119157	0.00423534	43
O43488;H3BLU7	AKR7A2	AKR7A2	Known mitochondrial	#N/A	Aflatoxin B1 aldehyde reductase member 2	0.00791302	-0.0190242	-0.0106866	-0.114941	0.238175	0.0747794	0.0850168	-0.154699	0.119104	-0.0169644	12
Q9NXR1;I3L522;I3L2R9	NDE1	NDE1	#N/A	#N/A	Nuclear distribution protein nudE homolog 1	-0.110916	-0.423391	0.273337	0.125651	-0.0536734	-0.115832	-0.197534	0.12075	0.119077	0.00995621	5
Q92504	SLC39A7	SLC39A7	#N/A	#N/A	Zinc transporter SLC39A7	0.00619029	-0.149345	0.00245056	-0.124204	0.225768	-0.0306339	0.0687396	-0.215781	0.118426	-0.0766606	5
E9PHG5;Q6UW02;F8WBE2;C9J8K7	CYP20A1	CYP20A1	#N/A	#N/A	Cytochrome P450 20A1	0.216362	-0.151314	0.403813	0.0909888	-0.237694	-0.0863848	-0.00781167	-0.111602	0.118426	0.0050262	8
P62633	CNBP	CNBP	#N/A	#N/A	Cellular nucleic acid-binding protein	-0.19952	0.139208	0.502636	0.290896	-0.406924	0.0812032	-0.286322	0.222805	0.11838	0.189856	11
Q92614;A0A0D9SFK2	MYO18A	MYO18A	#N/A	#N/A	Unconventional myosin-XVIIIa	0.037312	-0.0335843	0.0211954	-0.0236364	0.209141	-0.149137	0.293724	-0.155598	0.118227	-0.0850222	55
Q16531;F5GY55	DDB1	DDB1	#N/A	#N/A	DNA damage-binding protein 1	-0.0525208	-0.00958238	0.153287	0.037593	0.0820213	-0.0570764	0.10017	-0.0308992	0.118094	-0.00896531	74
A0A087X2D8	SPAG9	SPAG9	#N/A	#N/A		0.0592169	0.107152	0.0628125	-0.0502932	0.171335	-0.10939	0.0430645	-0.0251918	0.118094	-0.079539	56
Q5BJH7;K7ERQ0;K7ERY2	YIF1B	YIF1B	Predicted mitochondrial	#N/A	Protein YIF1B	-0.294385	-0.050129	0.154583	0.0219061	0.0803847	0.11929	-0.163333	-0.40549	0.117961	0.0714195	9
H0YKV4;Q9H5X1	FAM96A	FAM96A	#N/A	#N/A	MIP18 family protein FAM96A	0.125783	0.434348	0.0157831	-0.122758	0.213254	0.138683	-0.126281	-0.261137	0.117894	0.0138767	2
F8W1A4;P54819;F8VZG5;F8VY04	AK2	AK2	Known mitochondrial	#N/A	Adenylate kinase 2, mitochondrial;Adenylate kinase 2, mitochondrial;Adenylate kinase 2, mitochondrial, N-terminally processed	-0.184097	0.0972062	0.305095	0.0993626	-0.0976871	-0.238017	0.15082	-0.0266753	0.117715	-0.0594874	24
Q96EP0;H0YKX0;A0A0B4J293;H0YMG4	RNF31	RNF31	#N/A	#N/A	E3 ubiquitin-protein ligase RNF31	0.015212	-0.106933	0.23131	-0.657832	-0.00578236	-0.592071	-0.202323	-0.503057	0.117629	-0.624577	12
Q8NF37;A0A0G2JQ62;A0A0G2JRI7	LPCAT1	LPCAT1	#N/A	#N/A	Lysophosphatidylcholine acyltransferase 1	-0.127384	-0.113848	-0.105349	-0.087718	0.310456	-0.0933556	0.168642	-0.224132	0.117482	-0.0905341	15
P19447;A0A2R8Y6W8	ERCC3	ERCC3	#N/A	#N/A	TFIIH basal transcription factor complex helicase XPB subunit	-0.197385	-0.4569	0.196355	-0.0282486	0.033793	-0.478527	0.0738202	-0.0549317	0.117363	-0.235892	26
Q9NR12	PDLIM7	PDLIM7	#N/A	#N/A	PDZ and LIM domain protein 7	0.0788831	0.0429245	0.0122111	-0.121047	0.214871	0.00230651	0.0507454	-0.170102	0.117097	-0.0580523	27
O43493	TGOLN2	TGOLN2	#N/A	#N/A	Trans-Golgi network integral membrane protein 2	-0.397144	-0.105396	0.240375	-0.149761	-0.0177529	0.0164963	0.267955	-0.254737	0.117077	-0.0642385	7
P67936;A0A2R8YE05;K7ENT6	TPM4	TPM4	#N/A	#N/A	Tropomyosin alpha-4 chain	0.0835197	0.00173014	0.11023	0.0646069	0.123799	-0.00929199	0.122474	0.0204844	0.11703	0.0281306	48
P37198;M0QXN5	NUP62	NUP62	#N/A	#N/A	Nuclear pore glycoprotein p62	0.107554	0.0193461	0.0832474	0.165172	0.14952	0.051024	0.0797024	-0.0977025	0.116764	0.109227	14
Q9BUN8;B4E1G1;E5RGY0	DERL1	DERL1	#N/A	#N/A	Derlin-1	-0.468112	-0.190866	-0.410179	-0.0587434	0.50121	-0.0970852	-0.406713	-0.0725131	0.116318	-0.0777869	6
H7C0S8			#N/A	#N/A		0.0558898	-0.244087	-0.218078	-0.286392	0.387473	0.490673	0.461319	0.544288	0.116238	0.153838	7
P60900;G3V295;G3V5Z7;G3V3I1	PSMA6	PSMA6	#N/A	#N/A	Proteasome subunit alpha type-6;Proteasome subunit alpha type	0.157949	0.0447438	0.175812	-0.0733478	0.0538064	-0.0952963	0.0858326	-0.113114	0.116099	-0.0842803	20
A0A096LP10;A0A096LNJ4;A0A087WX43;D6RE84;A0A087WTT9;A0A1B0GVW6	ALG13	ALG13	#N/A	#N/A		0.0828389	0.0289935	0.151859	0.160404	0.0791561	-0.000533933	0.182438	0.0139266	0.115965	0.082178	5
P38606	ATP6V1A	ATP6V1A	Predicted mitochondrial	#N/A	V-type proton ATPase catalytic subunit A	0.095722	0.0900404	0.0206267	0.057277	0.204642	-0.0729076	0.0169242	-0.0828356	0.115566	-0.00634733	42
A0A087X2I1;P62333;H0YJC0	PSMC6	PSMC6	#N/A	#N/A	26S protease regulatory subunit 10B	0.180275	0.0333701	0.0919367	0.00834347	0.138552	0.0391384	-0.000216456	-0.046936	0.115433	0.0238231	29
P59998;F8WCF6;F8WDD7;A0A0A6YYG9;H7C0A3	ARPC4;ARPC4-TTLL3	ARPC4	#N/A	#N/A	Actin-related protein 2/3 complex subunit 4	0.0719	-0.0311646	0.0950467	-0.0495017	0.135535	-0.048263	0.0713507	-0.0273809	0.115433	-0.0488822	18
Q9Y3L3	SH3BP1	SH3BP1	#N/A	#N/A	SH3 domain-binding protein 1	-0.315756	-0.692315	0.0963968	-0.212601	0.133827	-0.960665	0.662388	0.20063	0.115233	-0.538681	15
A0A087WZG9;B4DSP0;A0A087WUL4;A0A087WX23;A0A087WXK2;Q86TG7	PEG10	PEG10	#N/A	#N/A	Retrotransposon-derived protein PEG10	0.140779	0.0694271	0.248535	0.126841	-0.0320347	-0.211899	0.0966667	0.284869	0.11506	-0.03261	9
Q9Y2S7;B4DEM9	POLDIP2	POLDIP2	Known mitochondrial	#N/A	Polymerase delta-interacting protein 2	-0.798517	-0.0130285	0.532566	0.0945064	-0.474893	-0.289757	-0.101552	0.107554	0.115046	-0.0848692	18
P24666;G5E9R5	ACP1	ACP1	#N/A	#N/A	Low molecular weight phosphotyrosine protein phosphatase	0.103531	0.121679	0.238665	0.198746	-0.0209551	-0.0123444	-0.0316512	0.121944	0.114687	0.0970578	17
Q9BVA0	KATNB1	KATNB1	#N/A	#N/A	Katanin p80 WD40 repeat-containing subunit B1	0.205017	0.214125	0.0167816	-0.0701635	0.206268	0.00432164	0.655901	0.422664	0.114634	-0.0324403	16
O43583;F8VVL1	DENR	DENR	#N/A	#N/A	Density-regulated protein	0.000432815	0.124857	0.107286	-0.0058403	0.121944	0.0882773	-0.00858066	-0.156306	0.114634	0.0419859	10
A0A1W2PNR9;Q9Y5U9	IER3IP1	IER3IP1	#N/A	#N/A	Immediate early response 3-interacting protein 1	0.28155	0.135404	0.0574155	0.350724	0.169412	-0.054662	0.203264	0.0669503	0.1145	0.162223	3
P22033	MUT	MUT	Known mitochondrial	#N/A	Methylmalonyl-CoA mutase, mitochondrial	-0.575486	-0.085956	0.291368	-0.186278	-0.0876414	-0.206146	0.0467006	-0.20083	0.114274	-0.196178	23
Q6ZYL4	GTF2H5	GTF2H5	#N/A	#N/A	General transcription factor IIH subunit 5	0.0852886	0.34153	0.379177	0.395502	-0.210897	-0.196756	0.0697021	-0.199222	0.114101	0.129553	4
A6NMQ3;Q5T5H1;O43768;A0A1W2PRU0	ENSA	ENSA	#N/A	#N/A	Alpha-endosulfine	0.116232	0.16221	0.284988	-0.0203843	-0.0801489	-0.104496	-0.124943	-0.0522216	0.11394	-0.0618271	7
Q9UJY5;B0QYR6	GGA1	GGA1	#N/A	#N/A	ADP-ribosylation factor-binding protein GGA1	0.0882773	0.0221902	0.18409	0.260989	0.0394191	0.0197731	-0.0141061	0.0922074	0.113567	0.145417	14
Q13838;Q5STU3;A0A0G2JJZ9;A0A140T9X3;F6WLT2;A0A140TA18;F6UJC5;A0A140T9X9;A0A140T996;F6TRA5;A0A0A0MT12	DDX39B	DDX39B	#N/A	#N/A	Spliceosome RNA helicase DDX39B	-0.0241498	-0.0245018	0.14104	0.0439044	0.0855606	0.00245056	0.135272	0.0915306	0.113567	0.0233264	38
P78356	PIP4K2B	PIP4K2B	#N/A	#N/A	Phosphatidylinositol 5-phosphate 4-kinase type-2 beta	-0.103317	-0.0308403	-0.121879	0.0173518	0.315798	0.0915306	0.223299	-0.0832177	0.113494	0.0549179	17
P23771	GATA3	GATA3	#N/A	#N/A	Trans-acting T-cell-specific transcription factor GATA-3	-0.428566	-0.340258	0.240497	-0.497364	-0.0261169	-0.133147	-0.0455803	-0.0682564	0.11334	-0.303792	12
P28331;B4DJ81	NDUFS1	NDUFS1	Known mitochondrial	#N/A	NADH-ubiquinone oxidoreductase 75 kDa subunit, mitochondrial	-1.00318	-0.129387	-0.0347366	-0.332081	0.247198	-0.29244	0.187261	-0.12455	0.113107	-0.312124	46
Q6P1R3	MSANTD2	MSANTD2	#N/A	#N/A	Myb/SANT-like DNA-binding domain-containing protein 2	0.164658	0.70558	0.215741	0.0641931	0.00259443	0.0436244	0.113701	0.120219	0.1131	0.0539454	4
A0A182DWF2;A0A182DWF3;Q9NNW7;D3YTF8;A0A096LPK7;A0A096LPD9;E7EWK1	TXNRD2	TXNRD2	Known mitochondrial	#N/A	Thioredoxin reductase 2, mitochondrial	-0.426044	0.00403388	-0.0675306	-0.140189	0.273337	-0.263698	0.388134	-0.168074	0.112947	-0.200623	16
Q02750	MAP2K1	MAP2K1	#N/A	#N/A	Dual specificity mitogen-activated protein kinase kinase 1	0.246834	0.0347792	-0.0391473	-0.0418478	0.250477	0.0130691	0.266397	0.0923428	0.11292	-0.0141281	18
Q99622;U3KQ85;F5GXW5;U3KQ07	C12orf57	C12orf57	#N/A	#N/A	Protein C10	0.149389	0.301471	0.139601	0.112767	0.0855606	0.110497	0.137504	0.0865121	0.112834	0.111632	7
Q13033;G3V340	STRN3	STRN3	#N/A	#N/A	Striatin-3	-0.0621585	-0.178224	-0.0542275	-0.0660648	0.262072	0.100036	-0.345656	-0.0151118	0.112573	0.0193746	20
Q9ULJ8	PPP1R9A	PPP1R9A	#N/A	#N/A	Neurabin-1	-0.151683	-0.0351505	0.219835	0.088413	-0.00330758	-0.077726	0.165301	-0.0935865	0.112573	0.00773372	14
A0A024RA52;P25787;C9JCK5	PSMA2	PSMA2	#N/A	#N/A	Proteasome subunit alpha type;Proteasome subunit alpha type-2	0.217107	0.104202	0.249385	0.0610158	-0.0387027	-0.158285	0.0865121	-0.113364	0.11252	-0.0444714	16
Q08AE8;J3KNG6	SPIRE1	SPIRE1	#N/A	#N/A	Protein spire homolog 1			-0.124078	-0.855014	0.315334	-0.132277	0.283685	-0.269408	0.112293	-0.448853	4
A0A3B3IRT8;P43307;C9J3L8;C9J5W0;E9PAL7;C9IZQ1	SSR1	SSR1	#N/A	#N/A	Translocon-associated protein subunit alpha	-0.047085	-0.154859	0.1149	-0.0745474	0.109561	-0.0599461	-0.0836609	-0.152885	0.112233	-0.0672283	6
Q8WVC2;P63220;Q9BYK1	RPS21	RPS21	#N/A	#N/A	40S ribosomal protein S21	0.095587	0.148218	0.23585	0.261591	-0.0232258	0.0779266	-0.122963	0.148869	0.11212	0.17268	7
O43852	CALU	CALU	Predicted mitochondrial	#N/A	Calumenin	-0.208411	-0.101474	0.0458623	-0.0820413	0.175173	0.0219061	-0.00379928	-0.241458	0.111966	-0.0291316	23
O95487	SEC24B	SEC24B	#N/A	#N/A	Protein transport protein Sec24B	0.175812	0.0308304	0.0182068	-0.0872275	0.199751	-0.0534339	0.105276	-0.0324772	0.111833	-0.0702317	32
Q9NQR4;H7C579	NIT2	NIT2	Predicted mitochondrial	#N/A	Omega-amidase NIT2	0.222928	0.100978	0.201634	-0.151426	0.0159258	-0.276747	-0.152308	-0.29791	0.111766	-0.212726	20
P06746;E7EW18;E5RIJ0;H0YBJ0	POLB	POLB	#N/A	#N/A	DNA polymerase beta	-0.0973321	0.0483758	0.121679	-0.0212626	0.100978	-0.359472	0.147958	-0.0839668	0.111365	-0.180479	12
P49757;G3V3Z8;G3V3R1	NUMB	NUMB	#N/A	#N/A	Protein numb homolog	-0.192233	-0.258874	0.124857	-0.222431	0.0976109	-0.133749	0.0972062	-0.25226	0.111298	-0.177409	16
P62877	RBX1	RBX1	#N/A	#N/A	E3 ubiquitin-protein ligase RBX1;E3 ubiquitin-protein ligase RBX1, N-terminally processed	0.10916	0.0236102	0.134878	0.160017	0.0871912	-0.0617669	0.000432815	-0.078716	0.111232	0.0533825	6
P51148;K7ENY4	RAB5C	RAB5C	Known mitochondrial	#N/A	Ras-related protein Rab-5C	0.0713507	-0.112787	0.117429	-0.0579623	0.104471	-0.166924	0.0370308	-0.160798	0.110964	-0.111415	15
Q92997	DVL3	DVL3	#N/A	#N/A	Segment polarity protein dishevelled homolog DVL-3	0.0347792	0.300885	-0.0704211	-0.196079	0.271904	0.0590784	0.135666	0.0384361	0.110871	-0.0628666	8
Q15691	MAPRE1	MAPRE1	#N/A	#N/A	Microtubule-associated protein RP/EB family member 1	0.135009	0.143393	0.109829	0.13711	0.111699	0.0447438	0.188907	0.104739	0.110764	0.091666	26
O95197	RTN3	RTN3	#N/A	#N/A	Reticulon-3	0.00504059	-0.0143393	-0.0131741	-0.153206	0.224534	-0.0360377	0.0132121	-0.242772	0.11057	-0.0934326	8
P54920;M0R0Y2;M0R2M1	NAPA	NAPA	#N/A	#N/A	Alpha-soluble NSF attachment protein	0.198997	0.137635	0.0747794	0.118227	0.14483	0.0650208	0.196859	0.0453032	0.11023	0.0918691	24
Q08AM6	VAC14	VAC14	#N/A	#N/A	Protein VAC14 homolog	0.212507	0.037593	0.0388575	-0.0811559	0.177982	0.0408223	-0.106358	-0.232294	0.110096	-0.018878	28
O94874	UFL1	UFL1	#N/A	#N/A	E3 UFM1-protein ligase 1	0.0909888	-0.0515188	0.0305479	-0.193354	0.185486	-0.0436608	0.1038	-0.136474	0.110096	-0.116567	36
A0A087WYY3;A0A2R8Y635;A0A2R8YDN7;Q9H7F0	ATP13A3	ATP13A3	#N/A	#N/A	Probable cation-transporting ATPase 13A3	-1.42364	1.43888	0.0681893	0.0747794	0.1503	0.239765	-0.174296	-0.0176069	0.109829	0.159629	3
Q5T1M5;A0A0A0MT60	FKBP15	FKBP15	#N/A	#N/A	FK506-binding protein 15;Peptidyl-prolyl cis-trans isomerase	0.420186	-0.0559662	0.162081	-0.190388	0.0549179	0.018919	0.223299	0.151599	0.109494	-0.081942	27
O00139	KIF2A	KIF2A	#N/A	#N/A	Kinesin-like protein KIF2A	0.0476779	-0.00330758	-0.000894759	-0.0176799	0.211884	-0.00990192	0.139208	-0.0202673	0.109414	-0.0137857	38
P61020;F8VUA5	RAB5B	RAB5B	#N/A	#N/A	Ras-related protein Rab-5B	0.0457225	-0.125652	0.054779	-0.0445236	0.161694	-0.230787	0.120219	-0.292511	0.109227	-0.134651	10
Q13308	PTK7	PTK7	#N/A	#N/A	Inactive tyrosine-protein kinase 7	-0.477784	-0.206928	0.215368	-0.097857	-0.00557957	-0.255426	-0.106249	-0.294367	0.10912	-0.174491	48
Q6PML9	SLC30A9	SLC30A9	Known mitochondrial	#N/A	Zinc transporter 9	-0.634957	-0.25972	-0.171823	0.0347792	0.344033	0.26111	0.339251	0.0565835	0.10904	0.152378	15
Q99757;M0QXH0	TXN2	TXN2	Known mitochondrial	#N/A	Thioredoxin, mitochondrial	-0.0765237	0.0411028	0.272023	0.0230425	-0.0747905	0.0366088	0.484087	0.358284	0.109013	0.0298416	3
Q9BV68;K7EIY6;U3KQF4	RNF126	RNF126	#N/A	#N/A	E3 ubiquitin-protein ligase RNF126	0.385597	0.310107	0.179766	0.0655723	0.0339339	-0.098691	-0.0710726	-0.157238	0.108692	-0.0142228	4
Q9NTM9;Q5TCZ7;A0A0B4J226	CUTC	CUTC	#N/A	#N/A	Copper homeostasis protein cutC homolog	0.603217	0.503552	0.25181	0.476019	-0.0504726	0.302056	-0.109795	-0.0446723	0.108571	0.391658	5
Q6UXN9	WDR82	WDR82	#N/A	#N/A	WD repeat-containing protein 82	0.282025	0.422018	0.191942	0.260989	0.0200577	-0.0898354	0.222805	0.17645	0.108558	0.0962146	20
P27348;E9PG15	YWHAQ	YWHAQ	Predicted mitochondrial	#N/A	14-3-3 protein theta	0.190299	0.141564	0.0551957	0.063779	0.159758	0.0223323	0.0586628	0.0464211	0.108424	0.0432045	32
J3KNN3;P15735;H3BP07;H3BTW6	PHKG2	PHKG2	#N/A	#N/A	Phosphorylase b kinase gamma catalytic chain, liver/testis isoform	-0.707736	-0.663077	0.274172	-0.704606	-0.0790665	-0.143229	0.135141	-0.41756	0.108337	-0.396783	7
P17706;K7EQG9;D3DUJ3	PTPN2	PTPN2	#N/A	#N/A	Tyrosine-protein phosphatase non-receptor type 2;Tyrosine-protein phosphatase non-receptor type;Protein-tyrosine-phosphatase	-0.120608	0.0886844	-0.135	0.146525	0.316378	0.212756	-0.184523	0.164658	0.10827	0.180021	17
O95057	DIRAS1	DIRAS1	#N/A	#N/A	GTP-binding protein Di-Ras1	-0.895127	-0.485317	-0.432649	-0.240725	0.50019	0.218223	0.199751	0.0714881	0.107889	0.00692274	5
A0A0G2JPP5;A0A0G2JNZ2;Q14160;A0A0G2JMS7	SCRIB	SCRIB	#N/A	#N/A	Protein scribble homolog	-0.0633941	-0.0931555	0.0224743	-0.0458782	0.188401	-0.0164244	0.166587	-0.167199	0.107822	-0.0310761	53
P19623	SRM	SRM	#N/A	#N/A	Spermidine synthase	0.323082	0.142479	0.290188	0.178109	-0.101289	-0.0229619	-0.234635	0.137504	0.107688	0.0810737	21
E9PRT0;E9PSB9;E9PR06;Q9NQC8	IFT46	IFT46	#N/A	#N/A	Intraflagellar transport protein 46 homolog	-0.866726	-0.35021	-0.262157	0.348459	0.40174	0.245739	-0.965221	-0.962716	0.107648	0.298013	3
Q9BW85;M0R2S3	CCDC94	CCDC94	#N/A	#N/A	Coiled-coil domain-containing protein 94	0.458067	0.113834	-0.00127013	0.121015	0.208767	-0.530447			0.107567	-0.168252	7
P61163;R4GMT0	ACTR1A	ACTR1A	#N/A	#N/A	Alpha-centractin	0.243791	0.250477	0.1145	0.0578315	0.100574	-0.100933	0.0750534	-0.0676213	0.107554	-0.0193677	29
P21281	ATP6V1B2	ATP6V1B2	#N/A	#N/A	V-type proton ATPase subunit B, brain isoform	0.12075	0.0942361	0.0405417	-0.017899	0.171463	-0.0351357	-0.0067532	-0.129071	0.107487	-0.0264916	40
K7ELQ9;Q6UW68;K7EM09;K7EPR0	TMEM205	TMEM205	#N/A	#N/A	Transmembrane protein 205	-0.0342785	-0.179776	0.119688	0.0360461	0.0949116	-0.157271	0.193078	-0.309395	0.107353	-0.0573766	4
P07741;H3BQZ9;H3BQB1;H3BQF1	APRT	APRT	#N/A	#N/A	Adenine phosphoribosyltransferase	0.485118	0.339935	0.0852886	0.115965	0.128425	-0.133765	-0.0205892	-0.0583978	0.107018	-0.00350281	15
O94822	LTN1	LTN1	#N/A	#N/A	E3 ubiquitin-protein ligase listerin	0.135929	0.145873	0.23842	-0.0130867	-0.0387175	0.0732718	0.101516	0.135798	0.106496	0.0307386	35
P42574;A8MVM1;C9JXR7	CASP3	CASP3	#N/A	#N/A	Caspase-3;Caspase-3 subunit p17;Caspase-3 subunit p12	0.425567	-0.00262814	0.188021	0.0719	0.0200577	-0.0576769	0.308594	0.0575542	0.106482	0.00856578	16
Q969V3;K7EMW4;A0A0C4DGP7;K7ELZ9;K7ENM2	NCLN	NCLN	#N/A	#N/A	Nicalin	0.0522768	-0.0880094	0.0418037	0.026021	0.167486	0.0650208	0.0691523	-0.0841349	0.106013	0.0456527	23
Q8TF05	PPP4R1	PPP4R1	#N/A	#N/A	Serine/threonine-protein phosphatase 4 regulatory subunit 1	0.125519	-0.524625	-0.0266606	-0.0536584	0.227371	0.263515	-0.0300152	-0.0272044	0.105939	0.113627	15
Q8TB61	SLC35B2	SLC35B2	#N/A	#N/A	Adenosine 3-phospho 5-phosphosulfate transporter 1	0.188401	0.0513026	0.0740944	-0.0279692	0.136454	0.0226164	0.164143	-0.214843	0.105611	-0.00245469	10
Q9Y6K0;A0A0C4DGS9	CEPT1	CEPT1	#N/A	#N/A	Choline/ethanolaminephosphotransferase 1	-0.351019	-0.256959	0.000288558	-0.228047	0.203514	0.0409626	0.147567	-0.180888	0.105477	-0.0872812	6
Q96KA5;G5E9Z2	CLPTM1L	CLPTM1L	#N/A	#N/A	Cleft lip and palate transmembrane protein 1-like protein	-0.119181	-0.135824	0.140909	-0.112771	0.0691523	-0.183327	-0.10827	-0.104077	0.105477	-0.147618	11
Q8NBF2	NHLRC2	NHLRC2	#N/A	#N/A	NHL repeat-containing protein 2	0.224411	0.125519	0.105142	-0.00258472	0.10541	-0.0355496	0.00216244	-0.0795085	0.105276	-0.018973	23
Q9NV96	TMEM30A	TMEM30A	#N/A	#N/A	Cell cycle control protein 50A	-0.365909	-0.299116	-0.10386	-0.267878	0.287827	-0.0325657	0.14978	-0.284933	0.105236	-0.14543	10
Q7L1V2;E7EW32;H3BUX9	MON1B	MON1B	#N/A	#N/A	Vacuolar fusion protein MON1 homolog B	0.599603	0.0415233	-0.128708	-0.584934	0.306029	0.068602	0.0169242	-0.384301	0.104974	-0.221472	8
Q9H0X4;B4DGG1;H7C2U8	ITFG3	ITFG3	#N/A	#N/A	Protein ITFG3	-0.3821	-0.355165	0.126048	0.1129	0.0832474	-0.0649477	0.306029	-0.109234	0.104806	0.0267151	9
Q9NPF4	OSGEP	OSGEP	#N/A	#N/A	Probable tRNA N6-adenosine threonylcarbamoyltransferase	0.209765	0.450169	0.112767	0.0258793	0.0963968	0.0676387	-0.150881	0.0517201	0.104605	0.0469101	9
Q9P0M6;Q5SQT3	H2AFY2	H2AFY2	#N/A	#N/A	Core histone macro-H2A.2;Histone H2A	-0.119401	-0.0817817	0.021764	0.00963388	0.182947	-0.0544522	0.111031	-0.0299268	0.104605	-0.0220534	26
E7EX44;Q05682	CALD1	CALD1	#N/A	#N/A	Caldesmon	-0.291327	-0.275385	0.280956	0.152638	-0.0969463	-0.0241937	-0.0425608	0.155879	0.104343	0.0669296	37
Q3LXA3;H0YCY6	DAK;TKFC	DAK	#N/A	#N/A	Bifunctional ATP-dependent dihydroxyacetone kinase/FAD-AMP lyase (cyclizing);ATP-dependent dihydroxyacetone kinase;FAD-AMP lyase (cyclizing)	0.200881	0.0780633	0.148869	-0.122507	0.0582473	-0.12915	-0.0153158	-0.165564	0.10427	-0.125825	28
Q6UXV4;A0A087WYF7;A0A087WUX8	APOOL	APOOL	Known mitochondrial	#N/A	MICOS complex subunit MIC27	-0.324365	-0.037636	0.153157	0.245252	0.0536674	-0.0851141	0.395063	-0.16707	0.10427	0.0895049	11
Q9H1Z4	WDR13	WDR13	#N/A	#N/A	WD repeat-containing protein 13	0.244765	-0.195038	0.0751904	-0.267288	0.132248	0.670931	-0.0928786	0.0468402	0.104001	0.276783	7
Q9NXW9	ALKBH4	ALKBH4	#N/A	#N/A	Alpha-ketoglutarate-dependent dioxygenase alkB homolog 4	0.50284	0.072586	-0.114394	-0.0468168	0.293606	-0.310683	0.0690147	-0.374262	0.103981	-0.172726	6
Q49A26;K7EMM8	GLYR1	GLYR1	#N/A	#N/A	Putative oxidoreductase GLYR1	-0.0505473	-0.124361	0.0592169	-0.00166007	0.147176	-0.0318871	0.209516	0.0672257	0.103867	-0.0166944	23
P54578;A6NJA2	USP14	USP14	#N/A	#N/A	Ubiquitin carboxyl-terminal hydrolase 14;Ubiquitin carboxyl-terminal hydrolase	0.111298	0.0936954	0.0729976	-0.0451932	0.133695	-0.0487107	0.0585243	0.00949053	0.103666	-0.0469509	43
P08240	SRPR	SRPR	#N/A	#N/A	Signal recognition particle receptor subunit alpha	-0.0502186	-0.141128	0.0234683	-0.0546919	0.179638	-0.0667598	0.16337	-0.166373	0.103665	-0.0607132	38
P41250	GARS	GARS	Known mitochondrial	#N/A	Glycine--tRNA ligase	0.154194	0.0901759	0.217355	0.200128	-0.0198577	0.0199154	-0.197236	-0.0437203	0.103618	0.112834	50
Q6FI13	HIST2H2AA3	HIST2H2AA3	#N/A	#N/A	Histone H2A type 2-A	-0.0942024	-0.0485912	-0.0491434	0.212756	0.241718	0.104873	0.477781	0.464668	0.103605	0.159823	14
Q7L5D6	GET4	GET4	#N/A	#N/A	Golgi to ER traffic protein 4 homolog	0.0832474	0.024036	0.0699771	0.0203421	0.136454	-0.0128974	0.0357646	0.0870554	0.103598	0.00381807	11
Q71UI9;P0C0S5;C9J0D1;A0A494C189	H2AFV;H2AFZ	H2AFV	#N/A	#N/A	Histone H2A.V;Histone H2A.Z;Histone H2A	-0.075216	-0.0972703	-0.0071301	-0.10231	0.206143	0.0211954	0.073546	-0.0352243	0.103444	-0.0392363	7
Q6GQQ9;Q5SZ59	OTUD7B	OTUD7B	#N/A	#N/A	OTU domain-containing protein 7B	-0.329903	-0.346793	0.0497701	0.1995	0.154972	0.421587	-0.280387	0.135404	0.10333	0.314813	7
P26599;A0A0U1RRM4	PTBP1	PTBP1	#N/A	#N/A	Polypyrimidine tract-binding protein 1	0.0882773	0.0213375	0.150949	0.0536674	0.0536674	0.0107799	0.100978	0.101516	0.103128	0.032383	40
P15104;A0A2R8YDT1	GLUL	GLUL	Predicted mitochondrial	#N/A	Glutamine synthetase	0.44297	0.115832	0.340277	0.990301	-0.181019	0.0156403	-0.881002	-0.143803	0.103048	0.58376	12
Q9Y679	AUP1	AUP1	#N/A	#N/A	Ancient ubiquitous protein 1	-0.123057	-0.18092	0.230695	0.173895	-0.0372659	0.0309717	-0.163882	0.0270125	0.102927	0.104202	17
P68431;Q16695	HIST1H3A;HIST3H3	HIST1H3A	#N/A	#N/A	Histone H3.1;Histone H3.1t	0.117296	0.0596321	0.104873	0.0736831	0.100978	0.105946	0.29537	0.24062	0.102927	0.0899049	11
Q01831	XPC	XPC	#N/A	#N/A	DNA repair protein complementing XP-C cells	-0.207694	-0.185655	0.0694271	-0.184457	0.135272	0.0588013	0.275961	0.00360232	0.102725	-0.0577069	29
Q969E8	TSR2	TSR2	#N/A	#N/A	Pre-rRNA-processing protein TSR2 homolog	0.142087	0.1145	-0.261742	-0.0517281	0.393306	0.446891	0.0100636	0.189034	0.102645	0.219017	3
Q15643;H0YJ97	TRIP11	TRIP11	#N/A	#N/A	Thyroid receptor-interacting protein 11	0.268315	0.293488	0.16221	0.17645	0.0395595	-0.0890371	0.108223	0.0467006	0.102188	0.049805	14
O15514;E9PHV4;E9PB93	POLR2D	POLR2D	#N/A	#N/A	DNA-directed RNA polymerase II subunit RPB4	-0.279879	0.105276	0.210389	0.133564	-0.0148639	-0.0470999	0.0648829	0.136716	0.102154	0.046058	9
Q9ULR0;A8MVI5;D6RC18	ISY1	ISY1	#N/A	#N/A	Pre-mRNA-splicing factor ISY1 homolog	-0.133195	0.0893625	0.0377336	0.106348	0.163756	0.233888	-0.0279692	-0.0919711	0.102121	0.171527	15
Q9H115;A0A087WZQ7	NAPB	NAPB	#N/A	#N/A	Beta-soluble NSF attachment protein	0.0772429	-0.187116	-0.0864614	-0.3315	0.268794	-0.0940946	0.242816	-0.349897	0.102074	-0.207919	16
P48147;A0A499FJL1	PREP	PREP	#N/A	#N/A	Prolyl endopeptidase	0.173895	0.00662125	0.141956	-0.0335695	0.0610158	-0.0474279	-0.0902499	0.0328061	0.102053	-0.0404821	61
P54136	RARS	RARS	Predicted mitochondrial	#N/A	Arginine--tRNA ligase, cytoplasmic	0.208517	0.0561673	0.090718	-0.0193751	0.113167	-0.0112244	0.0306892	-0.0612249	0.101986	-0.015294	64
F8VNV8;P54284;F8VUW8;F8VU10	CACNB3	CACNB3	#N/A	#N/A	Voltage-dependent L-type calcium channel subunit beta-3	0.0104934	0.0347792	0.146525	0.137635	0.0558898	-0.481284	1.10306	-0.0930786	0.101919	-0.138886	3
P62310	LSM3	LSM3	#N/A	#N/A	U6 snRNA-associated Sm-like protein LSm3	0.0427844	0.175301	0.103397	0.0988237	0.10017	-0.0139896	0.0199154	-0.00187669	0.101785	0.0435195	7
O60504;H0YAZ3;H0YB51	SORBS3	SORBS3	#N/A	#N/A	Vinexin	0.255682	0.194465	-0.0768432	-0.346793	0.260508	-0.195401	0.158208	-0.0510404	0.10167	-0.269112	9
J3KPY9;P58335;A0A0C4DG84	ANTXR2	ANTXR2	#N/A	#N/A	Anthrax toxin receptor 2	-0.513667	-0.00508726	0.00288247	-0.705359	0.193835	-0.188907	-0.476719	-0.773319	0.101516	-0.424146	6
Q99767	APBA2	APBA2	#N/A	#N/A	Amyloid beta A4 precursor protein-binding family A member 2	-0.0203551	-0.357308	-0.312814	-0.331917	0.422986	0.806035	0.0352017	-0.45332	0.101495	0.346463	11
H3BPE1;H3BQK9	MACF1	MACF1	#N/A	#N/A		0.0409626	-0.010178	-0.0673039	-0.11129	0.252537	0.00590291	0.167872	0.00906043	0.101462	-0.0515039	165
P82909	MRPS36	MRPS36	Known mitochondrial	#N/A	28S ribosomal protein S36, mitochondrial	-0.446856	-0.0182935	0.0207689	0.051024	0.177727	-0.03292	0.442864	0.00590291	0.101381	0.00966249	6
G8JLA2;F8VZU9;F8W180	MYL6	MYL6	Predicted mitochondrial	#N/A				0.0560286	0.645056	0.145221	0.0244615			0.101314	0.367874	12
G3V1C3;Q9BZZ5;H0YER7	API5	API5	#N/A	#N/A	Apoptosis inhibitor 5	-0.0540178	-0.127163	0.215368	0.0728604	-0.0226102	0.0271541	0.0581087	0.136716	0.10128	0.0501883	36
Q9NW64;E5RJW4	RBM22	RBM22	#N/A	#N/A	Pre-mRNA-splicing factor RBM22	-0.0768737	0.081067	0.154065	0.0196308	0.0461418	0.159758	-0.0123008	0.145482	0.101112	0.0913952	20
Q9NYL4;F8VU90	FKBP11	FKBP11	Predicted mitochondrial	#N/A	Peptidyl-prolyl cis-trans isomerase FKBP11;Peptidyl-prolyl cis-trans isomerase	-0.0146453	-0.284476	0.403704	0.825297	-0.282719	-0.32762	-0.217809	-0.483904	0.100937	0.361067	3
B1AK87;B1AK88	CAPZB	CAPZB	#N/A	#N/A		0.136585	0.0650208	0.0903115	0.0684644	0.110898	-0.0665482	0.110096	-0.0371475	0.100641	0.00253688	26
P47897;B4DDN1	QARS	QARS	#N/A	#N/A	Glutamine--tRNA ligase	0.0996318	-0.0133924	0.0447438	-0.048636	0.153676	0.0204844	0.0959919	-0.106948	0.100238	-0.0136619	64
Q9H5N1;B4DHR0	RABEP2	RABEP2	#N/A	#N/A	Rab GTPase-binding effector protein 2	0.246591	0.142348	0.0997664	0.340391	0.100574	-0.108767	0.318346	0.239154	0.10017	0.133222	12
Q14558;B4DP31	PRPSAP1	PRPSAP1	#N/A	#N/A	Phosphoribosyl pyrophosphate synthase-associated protein 1	0.067088	0.109962	0.123534	0.160146	0.0760118	0.0533895	-0.0219069	0.000144286	0.0999685	0.107755	20
Q49AR2	C5orf22	C5orf22	#N/A	#N/A	UPF0489 protein C5orf22	0.346418	0.231064	0.335712	0.250598	-0.182295	-0.144824	-0.468891	-1.57691	0.0998338	0.0663923	7
A0A0A0MTH9;O14981	BTAF1	BTAF1	#N/A	#N/A	TATA-binding protein-associated factor 172	0.0681893	0.128293	0.288063	0.0691523	-0.117161	0.127237	-0.0241937	-0.0133634	0.0996318	0.098487	32
J3KPF0;F8VWT9;Q9Y4D8	HECTD4	HECTD4	#N/A	#N/A	Probable E3 ubiquitin-protein ligase HECTD4	-0.240895	-0.213052	-0.151651	-0.285653	0.313478	0.0629506	0.230818	-0.11034	0.099578	-0.100848	44
Q9UBC2;M0R165;M0R2S2	EPS15L1	EPS15L1	#N/A	#N/A	Epidermal growth factor receptor substrate 15-like 1	0.0727232	0.0858326	0.0593554	0.0522768	0.138552	-0.0610443	0.232661	0.186627	0.0994973	-0.00327138	30
O95630;C9JK83;F5H5B9	STAMBP	STAMBP	#N/A	#N/A	STAM-binding protein	0.214747	0.0575542	0.0643311	-0.152179	0.133827	-0.0883161	0.12499	-0.15117	0.0994973	-0.119894	13
Q9HD20	ATP13A1	ATP13A1	Predicted mitochondrial	#N/A	Manganese-transporting ATPase 13A1	-0.022493	-0.105256	0.0690147	-0.0402298	0.129349	-0.0323739	0.0582473	-0.12009	0.0994972	-0.0362965	60
O75351	VPS4B	VPS4B	#N/A	#N/A	Vacuolar protein sorting-associated protein 4B	0.179129	0.0384361	-0.0485167	-0.0700121	0.23352	0.0391384	0.200379	0.0603242	0.0993827	-0.0144048	25
Q8NFF5;Q5T196	FLAD1	FLAD1	Known mitochondrial	#N/A	FAD synthase;Molybdenum cofactor biosynthesis protein-like region;FAD synthase region	-0.0316512	-0.0111954	-0.00810176	-0.0476515	0.198494	-0.0599761	0.165172	-0.0628063	0.0988912	-0.0538007	27
Q96P48;E7EU13;A0A0A0MSJ2	ARAP1	ARAP1	#N/A	#N/A	Arf-GAP with Rho-GAP domain, ANK repeat and PH domain-containing protein 1	0.504875	0.652509	-0.0462804	-0.0163515	0.230695	-0.0642084	-0.0897125	-0.303401	0.098844	-0.0400815	29
H3BR94;Q9BTE1;H3BUD2;H3BS05	DCTN5	DCTN5	#N/A	#N/A	Dynactin subunit 5	0.126444	0.169412	0.0224743	0.264116	0.171335	0.130536	0.369383	0.0082	0.0988237	0.198871	4
O60749	SNX2	SNX2	#N/A	#N/A	Sorting nexin-2	0.124461	0.0807941	0.112767	-0.0390583	0.0846086	-0.0301183	-0.0250302	0.00273846	0.0987564	-0.0345814	28
O60645;D6RB59	EXOC3	EXOC3	#N/A	#N/A	Exocyst complex component 3	-0.101799	-0.108099	-0.103844	-0.283281	0.276318	0.0727232	-0.173352	-0.154811	0.0987227	-0.0943256	33
O43678	NDUFA2	NDUFA2	Known mitochondrial	#N/A	NADH dehydrogenase [ubiquinone] 1 alpha subcomplex subunit 2	-1.03593	-0.0849764	0.0708015	-0.355756	0.126048	-0.31973	0.0871912	-0.33219	0.0986891	-0.33763	4
O60220	TIMM8A	TIMM8A	Known mitochondrial	#N/A	Mitochondrial import inner membrane translocase subunit Tim8 A	-0.123575	-0.058488	0.169668	0.193583	0.0238941	-0.0611647	0.202762	-0.0537333	0.0986217	0.0718244	7
C9J2Y9;P30876;A0A1W2PPT5;C9J4M6	POLR2B	POLR2B	#N/A	#N/A	DNA-directed RNA polymerase;DNA-directed RNA polymerase II subunit RPB2	-0.365611	-0.000721562	0.126312	-0.0185127	0.0698396	0.0751904	0.0479571	0.0640551	0.0983522	0.0290995	69
O00764;F2Z2Y4	PDXK	PDXK	#N/A	#N/A	Pyridoxal kinase	0.300651	0.123666	-0.0736361	-0.00371246	0.251931	0.051024	-0.00546373	-0.162735	0.0983117	0.0239154	15
Q9UNZ2;F2Z2K0	NSFL1C	NSFL1C	#N/A	#N/A	NSFL1 cofactor p47	0.176833	0.150949	0.119024	0.021764	0.0772429	-0.00898711	0.0932897	-0.000779292	0.0982847	0.00647038	21
P22314	UBA1	UBA1	Known mitochondrial	#N/A	Ubiquitin-like modifier-activating enzyme 1	0.187008	0.0673633	-0.00492797	-0.0545121	0.194339	-0.0273809	0.0360461	-0.0482183	0.0981433	-0.0408827	75
P51580	TPMT	TPMT	#N/A	#N/A	Thiopurine S-methyltransferase	0.198117	0.155361	0.133037	0.156267	0.0618453	0.0384361	-0.157528	-0.0337763	0.0978805	0.0985543	12
Q5VTE6	ANGEL2	ANGEL2	Known mitochondrial	#N/A	Protein angel homolog 2	0.204141	0.0160683	0.188654	0.105946	-0.000418408	0.0517201	-0.00782619	0.0732718	0.097213	0.0790879	8
Q969S3	ZNF622	ZNF622	#N/A	#N/A	Zinc finger protein 622	0.139208	-0.00914677	0.0968015	0.129217	0.0973411	-0.0665331	0.172231	0.100036	0.0970714	0.0346595	16
P22570;A0A0C4DFN8;A0A0A0MSZ4;A0A0A0MTR6;A0A0C4DGN7;A0A0A0MT64;A0A0A0MTN9;J3QQX3	FDXR	FDXR	Known mitochondrial	#N/A	NADPH:adrenodoxin oxidoreductase, mitochondrial	-0.433	-0.263525	-0.026161	-0.630952	0.210514	-0.403866	0.241962	-0.544308	0.0970241	-0.512946	30
Q92896;H3BM42	GLG1	GLG1	#N/A	#N/A	Golgi apparatus protein 1	-0.103116	-0.0257057	-0.022068	0.018919	0.207018	0.0289935	0.195852	-0.0711939	0.0970174	0.023965	64
Q9P2L0;F8WB94	WDR35	WDR35	#N/A	#N/A	WD repeat-containing protein 35	-0.393236	-0.112444	0.0833836	0.251568	0.11023	-0.13841	0.492827	-0.209929	0.096869	0.0697159	7
P60660;F8W1R7;J3KND3;G3V1V0;B7Z6Z4;G3V1Y7;F8VPF3	MYL6	MYL6	Predicted mitochondrial	#N/A	Myosin light polypeptide 6	0.00144204	0.0295589	0.0499095	-0.0971932	0.141956	-0.0545271	0.171847	-0.0359045	0.0966667	-0.0757025	13
Q06210	GFPT1	GFPT1	#N/A	#N/A	Glutamine--fructose-6-phosphate aminotransferase [isomerizing] 1	0.365916	0.0806577	0.107554	0.0354831	0.0854246	0.0219061	-0.099649	-0.133875	0.0965317	0.0287106	39
Q7L0J3	SV2A	SV2A	#N/A	#N/A	Synaptic vesicle glycoprotein 2A	-0.0202088	-0.0425014	-0.0337319	-0.113239	0.215989	-0.0118352	0.0949116	-0.181051	0.096525	-0.0616465	16
F5GX09;Q5HYJ3	FAM76B	FAM76B	#N/A	#N/A	Protein FAM76B	-0.0574217	0.172359	0.0629506	0.500598	0.129217	0.256045	0.306029	0.262433	0.0964643	0.383497	10
Q01968	OCRL	OCRL	#N/A	#N/A	Inositol polyphosphate 5-phosphatase OCRL-1	0.0586628	-0.0465932	0.0180643	-0.0718457	0.170694	-0.140682	0.0395595	-0.229399	0.0963968	-0.105854	32
H0YME5;Q9P2K8	EIF2AK4	EIF2AK4	#N/A	#N/A	Eukaryotic translation initiation factor 2-alpha kinase 4	-0.374917	-0.523898	-0.323317	-0.597714	0.421048	0.171207	-0.208811	-0.0515786	0.0963495	-0.162622	12
P53007;B4DP62	SLC25A1	SLC25A1	Known mitochondrial	#N/A	Tricarboxylate transport protein, mitochondrial	-0.431656	-0.157737	-0.229095	-0.264686	0.361656	-0.131503	0.492622	-0.351608	0.096309	-0.196558	17
Q06546	GABPA	GABPA	#N/A	#N/A	GA-binding protein alpha chain	0.136454	0.0457225	-0.107834	0.139731	0.275007	-0.0190096	-0.0764324	0.105544	0.0962484	0.0625431	13
Q1KMD3;H3BQZ7	HNRNPUL2;HNRNPUL2-BSCL2	HNRNPUL2	#N/A	#N/A	Heterogeneous nuclear ribonucleoprotein U-like protein 2	-0.148705	-0.0825147	-0.00833397	-0.00823235	0.193583	-0.00794222	0.163628	-0.00559408	0.0961539	-0.00808728	52
Q8NEU8	APPL2	APPL2	#N/A	#N/A	DCC-interacting protein 13-beta	0.193709	-0.00515967	-0.0450444	-0.101892	0.224658	0.118891	0.298306	0.0306892	0.0960998	0.0127188	24
P62820;E7END7	RAB1A	RAB1A	#N/A	#N/A	Ras-related protein Rab-1A	-0.0682564	-0.0516534	0.0323829	-0.0258379	0.157044	-0.106017	0.0475383	-0.0997418	0.0960594	-0.0653703	24
Q13356	PPIL2	PPIL2	#N/A	#N/A	Peptidyl-prolyl cis-trans isomerase-like 2	-0.150369	0.209141	0.319618	-0.0944797	-0.168642	0.268195	0.301705	0.210389	0.0960459	0.0982242	10
A6PW57;Q99755	PIP5K1A	PIP5K1A	#N/A	#N/A	Phosphatidylinositol 4-phosphate 5-kinase type-1 alpha	-0.0624748	-0.120718	-0.0862623	-0.188858	0.257856	-0.115785	-0.0485465	-0.447328	0.0960324	-0.151859	9
Q9P2R7;A0A2R8YDQ9;A0A2R8Y6Y7;Q5T9Q5;A0A2R8Y5P6;A0A2R8Y6E6	SUCLA2	SUCLA2	Known mitochondrial	#N/A	Succinyl-CoA ligase [ADP-forming] subunit beta, mitochondrial	-0.122884	-0.0807896	0.106616	-0.198543	0.0851526	-0.0634393	0.300299	-0.100144	0.0959244	-0.12941	24
Q7RTP6	MICAL3	MICAL3	#N/A	#N/A	Protein-methionine sulfoxide oxidase MICAL3	-0.304434	-0.076402	-0.109904	0.0319598	0.275365	-0.238323	0.568713	0.124593	0.0955531	-0.0968614	13
J3QL71;Q96FV2;J3QQM9;J3QRJ1	SCRN2	SCRN2	#N/A	#N/A	Secernin-2	-0.0171543	-0.0269545	0.138028	0.0284277	0.0517201	-0.107353	-0.172636	-0.482896	0.0955194	-0.0378656	10
Q9Y262;B0QY89;B0QY90	EIF3L	EIF3L	#N/A	#N/A	Eukaryotic translation initiation factor 3 subunit L	0.0441843	0.0257376	0.14978	0.0352017	0.0387171	-0.020838	-0.0487703	0.0405417	0.0953169	0.00745392	34
B1APY9;B1APY8;A0A494C0F8;A0A494C147;A0A0R4J2E6;A0A494C015	ELAVL4	ELAVL4	#N/A	#N/A	ELAV-like protein	0.037593	-0.0111663	-0.101459	-0.0222878	0.268434	0.1133	0.214125	0.033793	0.0953101	0.0470986	31
Q96JB5;J3QQY1	CDK5RAP3	CDK5RAP3	#N/A	#N/A	CDK5 regulatory subunit-associated protein 3	-0.134556	-0.125305	0.0684644	0.000288558	0.121413	-0.0207941	0.0396999	-0.0850529	0.0951818	-0.0102143	20
P55263	ADK	ADK	#N/A	#N/A	Adenosine kinase	0.09815	0.123401	-0.00771017	-0.0351061	0.191184	-0.0158701	-0.130223	-0.156498	0.0951615	-0.025456	24
Q6DD87	ZNF787	ZNF787	#N/A	#N/A	Zinc finger protein 787	0.0458623	0.135141	0.178109	0.0116388	0.00705191	-0.089206	0.0533895	-0.0291169	0.0951142	-0.0379026	9
P51858	HDGF	HDGF	#N/A	#N/A	Hepatoma-derived growth factor	0.0370308	0.0903115	0.144177	0.0413831	0.0439044	-0.0471446	-0.226358	-0.0543174	0.0949117	-0.00220181	22
Q9NXV6	CDKN2AIP	CDKN2AIP	#N/A	#N/A	CDKN2A-interacting protein	-0.121863	-0.0303245	0.090718	-0.0782895	0.098689	-0.0589087	-0.0244432	-0.0270575	0.094709	-0.0685666	25
Q9H993;F5GZY1	ARMT1	ARMT1	#N/A	#N/A	Protein-glutamate O-methyltransferase	0.228603	0.0588013	0.00762616	0.0535284	0.176195	0.0394191	0.0958569	-0.080637	0.0943712	0.046491	16
Q00688	FKBP3	FKBP3	#N/A	#N/A	Peptidyl-prolyl cis-trans isomerase FKBP3	0.0840642	0.0367495	0.112633	0.0519985	0.075738	-0.0600964	0.0366088	-0.141923	0.0943036	-0.00296054	18
Q92995;H7C5J3	USP13	USP13	#N/A	#N/A	Ubiquitin carboxyl-terminal hydrolase 13	0.0790197	0.14274	0.449324	0.22848	-0.377932	0.159758	-0.245232	0.208143	0.0941955	0.194528	18
Q9P016	THYN1	THYN1	#N/A	#N/A	Thymocyte nuclear protein 1	-0.00763764	-0.00114018	0.0640551	-0.0671224	0.123534	-0.0437649	0.172103	0.0411028	0.094101	-0.0553964	16
P55036;A6PVX3	PSMD4	PSMD4	#N/A	#N/A	26S proteasome non-ATPase regulatory subunit 4	0.0536674	-0.0457292	0.0635029	-0.0330528	0.124063	-0.00497146	0.0384361	-0.0849764	0.0941009	-0.0189438	19
Q04760	GLO1	GLO1	#N/A	#N/A	Lactoylglutathione lyase	0.143655	0.206268	0.183709	0.0908535	-0.00168891	-0.0141499	-0.111929	0.0316775	0.093986	0.0393069	14
Q96HY6	DDRGK1	DDRGK1	#N/A	#N/A	DDRGK domain-containing protein 1	-0.41062	-0.221371	-0.0282045	-0.180299	0.206393	-0.0240617	0.064469	-0.250526	0.0938576	-0.100066	11
Q9NRF8	CTPS2	CTPS2	Predicted mitochondrial	#N/A	CTP synthase 2	0.201634	0.116764	0.0963968	0.219339	0.0911243	-0.0954504	-0.0185711	0.0543624	0.093763	0.070513	29
Q9Y2L5;J3QQJ5;J3KSL8	TRAPPC8	TRAPPC8	#N/A	#N/A	Trafficking protein particle complex subunit 8	0.0163537	0.00403388	-0.0935557	-0.416115	0.259062	-0.170394	0.398569	-0.0494569	0.0934993	-0.288029	18
Q7Z417	NUFIP2	NUFIP2	#N/A	#N/A	Nuclear fragile X mental retardation-interacting protein 2	0.0237522	-0.0276161	0.0768327	-0.0957742	0.109962	0.0197731	-0.0076666	-0.279581	0.0934926	-0.036844	14
Q9NWV4	C1orf123	C1orf123	#N/A	#N/A	UPF0587 protein C1orf123	0.235359	0.126973	0.0511633	-0.00372694	0.134484	0.051024	-0.00650674	0.0237522	0.093425	0.0239083	8
Q6P1X6;H0YF29	C8orf82	C8orf82	Known mitochondrial	#N/A	UPF0598 protein C8orf82	-0.0146016	0.123931	0.154194	0.353775	0.0298416	-0.258857	0.457857	-0.0176799	0.0933574	0.0797365	10
P11233;H7C3P7;C9JPE8	RALA	RALA	Predicted mitochondrial	#N/A	Ras-related protein Ral-A	-0.205064	-0.202041	0.0220482	-0.164965	0.161049	-0.123465	0.0893625	-0.33488	0.0932222	-0.144066	16
Q9Y2I7;E9PDH4	PIKFYVE	PIKFYVE	#N/A	#N/A	1-phosphatidylinositol 3-phosphate 5-kinase	-0.539582	0.267356	0.189919	0.198746	-0.0113117	0.134352	0.179766	-0.454921	0.0928096	0.166908	9
Q9H0D6	XRN2	XRN2	#N/A	#N/A	5-3 exoribonuclease 2	0.0504668	-0.0669562	0.208642	0.0994973	-0.0336877	0.0206267	0.144699	0.17594	0.0925592	0.0606009	55
Q03111	MLLT1	MLLT1	#N/A	#N/A	Protein ENL	-0.210279	-0.0250009	0.10286	0.255078	0.0821575	-0.131218	-0.12122	-0.652085	0.0925457	0.0748205	7
Q5BJF6	ODF2	ODF2	#N/A	#N/A	Outer dense fiber protein 2	-0.395796	-0.317427	-0.0419072	-0.380409	0.215492	0.145091	0.286999	-0.150689	0.0925255	-0.0938636	9
Q12792;F8VS81	TWF1	TWF1	#N/A	#N/A	Twinfilin-1	0.193961	0.0219061	0.109829	-0.00655027	0.0749164	-0.014179	0.128425	0.0460021	0.0924781	-0.0103596	19
O43684;J3QT28;J3QSX4	BUB3	BUB3	#N/A	#N/A	Mitotic checkpoint protein BUB3	0.0292761	0.0489336	0.171975	0.182184	0.00805652	-0.00316296	0.0688772	0.222557	0.0923428	0.0924849	22
P55210;A0A0A0MRL7;Q5SVL2	CASP7	CASP7	#N/A	#N/A	Caspase-7;Caspase-7 subunit p20;Caspase-7 subunit p11	0.47633	0.251325	-0.162945	-0.0874421	0.308827	0.264597	0.38659	-0.023475	0.0921398	0.0992885	10
Q9ULX6	AKAP8L	AKAP8L	#N/A	#N/A	A-kinase anchor protein 8-like	-0.121926	-0.175729	-0.0967612	-0.257114	0.258579	-0.0259259	0.131326	-0.0970697	0.0918217	-0.136894	19
Q8WYA6;A0A087WUB9	CTNNBL1	CTNNBL1	#N/A	#N/A	Beta-catenin-like protein 1	0.0522768	-0.000259717	0.137504	-0.0102215	0.0441843	0.10742	0.132643	0.121679	0.0915983	0.049798	36
Q9NRA8;B1AKL4	EIF4ENIF1	EIF4ENIF1	#N/A	#N/A	Eukaryotic translation initiation factor 4E transporter	-0.153142	-0.172864	0.0159258	-0.16694	0.162983	0.159888	-0.178714	-0.201112	0.0913276	0.00570901	8
P67775	PPP2CA	PPP2CA	#N/A	#N/A	Serine/threonine-protein phosphatase 2A catalytic subunit alpha isoform	-0.0493972	0.0913952	0.0153548	0.033793	0.16337	-0.0317692	0.0610158	-0.0175631	0.0912597	0.00138431	26
A9Z1X7;Q8IYB3;E9PCT1;M0R088	SRRM1	SRRM1	#N/A	#N/A	Serine/arginine repetitive matrix protein 1	0.0866479	0.0264459	-0.0114861	-0.0545421	0.187008	0.0436244	0.176067	0.209391	0.0911717	-0.00462406	30
P63244;J3KPE3;D6RAC2;D6REE5;H0Y8W2;H0YAF8;H0YAM7;D6RHH4	GNB2L1	GNB2L1	Predicted mitochondrial	#N/A	Guanine nucleotide-binding protein subunit beta-2-like 1;Guanine nucleotide-binding protein subunit beta-2-like 1, N-terminally processed	0.286999	0.327112	0.252658	0.284633	-0.0908183	-0.0680749	-0.162848	0.0652966	0.0911176	0.119031	34
Q07954	LRP1	LRP1	#N/A	#N/A	Prolow-density lipoprotein receptor-related protein 1;Low-density lipoprotein receptor-related protein 1 85 kDa subunit;Low-density lipoprotein receptor-related protein 1 515 kDa subunit;Low-density lipoprotein receptor-related protein 1 intracellular domain	-0.330338	-0.343714	-0.0883007	-0.364366	0.249749	-0.153527	0.161952	-0.226831	0.0906028	-0.255098	78
Q92783	STAM	STAM	#N/A	#N/A	Signal transducing adapter molecule 1	0.0630888	0.00144204	0.100709	-0.106855	0.0799754	0.0554733	0.0820213	-0.0168769	0.0903792	-0.0234091	18
Q15907	RAB11B	RAB11B	Known mitochondrial	#N/A	Ras-related protein Rab-11B	-0.182524	-0.0523413	0.0601858	-0.0760674	0.119688	-0.0537932	0.100709	-0.0476665	0.0902438	-0.0648873	22
Q08170;A0A0D9SEM4	SRSF4	SRSF4	#N/A	#N/A	Serine/arginine-rich splicing factor 4	0.0309717	0.00848693	0.0164963	0.0508847	0.159758	-0.0225516	0.12618	-0.0279102	0.0899049	0.0146338	30
C9JFE4;Q13098;A0A096LP07;A0A096LPJ3;A8K070;J3KSA5	GPS1	GPS1	#N/A	#N/A	COP9 signalosome complex subunit 1	0.103531	0.051024	0.144308	0.0596321	0.0332292	0.0299829	0.00374607	0.0263043	0.0898372	0.0448837	30
Q75T13;B4DYY6	PGAP1	PGAP1	#N/A	#N/A	GPI inositol-deacylase	0.0302654	0.0713507	0.214125	0.0255958	-0.0465485	0.257252	0.136585	0.117695	0.0896676	0.146069	15
Q9BY77;F6VRR5;F8WCX5	POLDIP3	POLDIP3	#N/A	#N/A	Polymerase delta-interacting protein 3	-0.278391	-0.202738	0.214622	-0.0154034	-0.0472341	-0.201825	0.18612	-0.0225955	0.089627	-0.105605	25
Q02338;E9PCG9;C9K0G7	BDH1	BDH1	Known mitochondrial	#N/A	D-beta-hydroxybutyrate dehydrogenase, mitochondrial	0.171463	0.130799	0.307195	0.358734	-0.166762	-0.28437	0.152118	-0.153623	0.0895931	0.0727232	12
A0A2R8YGH5;P61966;H7C1E4	AP1S1	AP1S1	#N/A	#N/A	AP-1 complex subunit sigma-1A	0.147958	0.090718	0.0901759	-0.0371919	0.0889556	0.0550568	0.245496	0.017922	0.0895659	0.00966967	7
P63208;E5RJR5;E7ERH2;F8W8N3	SKP1	SKP1	#N/A	#N/A	S-phase kinase-associated protein 1	-0.135634	-0.00913223	0.0698396	0.0705267	0.108759	0.0450235	0.113701	-0.0321674	0.0894304	0.0578315	19
C9JIF9;P13798;H7C1U0	APEH	APEH	#N/A	#N/A	Acylamino-acid-releasing enzyme	-0.0469657	-0.0672283	0.063641	-0.177229	0.113834	-0.188217	-0.00135681	-0.175729	0.0889557	-0.182712	28
P62826;B5MDF5;J3KQE5;H0YFC6	RAN	RAN	#N/A	#N/A	GTP-binding nuclear protein Ran	0.235114	0.161307	0.155361	0.142348	0.0190613	0.032242	-0.0166288	0.0863761	0.08882	0.0883452	20
O95396	MOCS3	MOCS3	#N/A	#N/A	Adenylyltransferase and sulfurtransferase MOCS3;Molybdopterin-synthase adenylyltransferase;Molybdopterin-synthase sulfurtransferase	-0.207161	0.00561564	0.750435	0.470094	-1.16913	0.214871	0.196859	0.512176	0.0888132	0.348119	9
P51617;D3YTB5;H7C224;H7C2I6	IRAK1	IRAK1	#N/A	#N/A	Interleukin-1 receptor-associated kinase 1	0.815084	0.728051	0.251325	1.05942	-0.0946645	-0.42026	-0.0181182	-0.369389	0.0886776	0.50151	9
A0A087WWU8;A0A494C0P6	TPM3	TPM3	#N/A	#N/A		0.0935602	0.123931	-0.0107011	-0.0954041	0.180912	0.0220482	0.0533895	0.0236102	0.0882841	-0.035483	42
Q9UN70;A0A087X1P2	PCDHGC3	PCDHGC3	#N/A	#N/A	Protocadherin gamma-C3	-0.808134	-0.307234	0.334339	0.18574	-0.208711	-0.461343	0.958434	0.0147838	0.0882162	-0.101823	12
G3V2Q3;G3V5E1;O75909;G3V235	CCNK	CCNK	#N/A	#N/A	Cyclin-K	-0.256356	-0.144632	0.26123	-0.0597506	-0.108456	-0.00205011	-0.00842098	0.0751904	0.0881959	-0.0306119	6
Q13492	PICALM	PICALM	#N/A	#N/A	Phosphatidylinositol-binding clathrin assembly protein	-0.146691	-0.165483	-0.0161472	-0.110542	0.185486	-0.121	0.147567	-0.204516	0.0881891	-0.115762	21
J3QRS9;O43670;X6R4W8	ZNF207	ZNF207	#N/A	#N/A	BUB3-interacting and GLEBS motif-containing protein ZNF207	0.041243	0.0663992	0.166073	0.125519	0.00532815	-0.0608336	0.161565	0.201006	0.087938	0.0353494	9
P51553;G5E9Q7;E7EQB8;E9PF84;H7C1W2	IDH3G	IDH3G	Known mitochondrial	#N/A	Isocitrate dehydrogenase [NAD] subunit gamma, mitochondrial;Isocitrate dehydrogenase [NAD] subunit, mitochondrial	-0.486408	0.0352017	-0.0229766	-0.124236	0.190172	-0.222582	0.200128	-0.205447	0.0875307	-0.172571	14
O75155	CAND2	CAND2	#N/A	#N/A	Cullin-associated NEDD8-dissociated protein 2	-0.390718	-0.0813237	0.117429	0.0612924	0.0568609	-0.509533			0.0874628	-0.19607	16
Q6L8Q7;F6T1Q0	PDE12	PDE12	Known mitochondrial	#N/A	2,5-phosphodiesterase 12	0.0930192	0.105678	0.124196	0.140124	0.0490731	0.126576	-0.0174609	0.138159	0.0871234	0.133366	29
P56537	EIF6	EIF6	#N/A	#N/A	Eukaryotic translation initiation factor 6	0.0206267	0.111966	0.190552	0.208642	-0.0253972	0.0875986	-0.131029	0.211635	0.0866139	0.149389	11
E9PCH5	CAST	CAST	#N/A	#N/A		-0.0916482	-0.0955429	0.158078	-0.0972395	0.010923	-0.278776	-0.189022	-0.372954	0.0863762	-0.185154	15
Q9H4A6	GOLPH3	GOLPH3	Known mitochondrial	#N/A	Golgi phosphoprotein 3	0.0663992	0.164658	0.103128	0.12499	0.0692898	-0.189154	0.170566	0.124857	0.0863083	-0.0235484	13
O14562;H3BRL3;H3BUM8	UBFD1	UBFD1	#N/A	#N/A	Ubiquitin domain-containing protein UBFD1	-0.0706331	0.073546	0.0754641	-0.00297501	0.0969364	-0.0145141	-0.0732566	0.0295589	0.0862402	-0.00873304	16
O95182;M0R0N0	NDUFA7	NDUFA7	Known mitochondrial	#N/A	NADH dehydrogenase [ubiquinone] 1 alpha subcomplex subunit 7	-0.912184	-0.280159	0.12618	-0.28891	0.0450235	0.218595	0.173767	-0.198328	0.0861724	-0.0129557	9
Q96SU4	OSBPL9	OSBPL9	#N/A	#N/A	Oxysterol-binding protein-related protein 9	-0.119479	0.0643311	-0.0383026	-0.00924837	0.200755	0.271306	0.211261	0.169668	0.0861723	0.137838	19
P35244;B5MC59	RPA3	RPA3	#N/A	#N/A	Replication protein A 14 kDa subunit	0.398131	0.321004	0.0994973	0.218843	0.072586	0.0154976	0.0200577	0.193835	0.0861044	0.12075	10
P35626;Q8N433	ADRBK2	ADRBK2	#N/A	#N/A	Beta-adrenergic receptor kinase 2	-0.060969	-0.133416	0.156267	-0.0394142	0.0123541	0.0243196	0.162983	0.0647449	0.0861044	-0.00719535	15
Q7L8J4	SH3BP5L	SH3BP5L	#N/A	#N/A	SH3 domain-binding protein 5-like	-0.0808812	-0.206728	0.0875986	0.102322	0.0846086	-0.00778262			0.0861044	0.0483199	8
Q9H3S7	PTPN23	PTPN23	#N/A	#N/A	Tyrosine-protein phosphatase non-receptor type 23	0.14978	0.0469799	0.0323829	-0.141908	0.13711	-0.135412	0.128161	-0.144903	0.0856965	-0.138656	59
Q6PJG6	BRAT1	BRAT1	#N/A	#N/A	BRCA1-associated ATM activator 1	-0.0585481	0.201258	0.230941	0.0945064	-0.0758697	0.319849	-0.200465	0.215244	0.0856762	0.211573	24
P37287	PIGA	PIGA	#N/A	#N/A	Phosphatidylinositol N-acetylglucosaminyltransferase subunit A	0.424277	0.166073	0.199751	0.205142	-0.0382285	-0.136363	-0.0140625	0.207018	0.0856626	0.044471	5
Q13523;H0YDJ3	PRPF4B	PRPF4B	#N/A	#N/A	Serine/threonine-protein kinase PRP4 homolog	0.0985544	-0.0183226	0.0780633	0.00245056	0.0928839	0.0323829	0.156914	0.163756	0.0854926	0.0174944	43
Q4V328;A0A087WT45;A0A075B793	GRIPAP1	GRIPAP1	#N/A	#N/A	GRIP1-associated protein 1	0.339137	-0.0232111	-0.0186441	-0.231481	0.182057	-0.00348108	0.149259	-0.118398	0.0851935	-0.112982	37
O60508;Q5SRN1	CDC40	CDC40	#N/A	#N/A	Pre-mRNA-processing factor 17	-0.00255586	0.198368	0.215368	0.348686	-0.0579172	0.0517201	-0.114441	0.101784	0.0851867	0.20783	20
Q9BV20	MRI1	MRI1	#N/A	#N/A	Methylthioribose-1-phosphate isomerase	0.262553	0.181675	0.0556121	0.0113525	0.113967	0.0950467	0.0787465	0.0446039	0.0850847	0.0538064	15
Q6DD88	ATL3	ATL3	#N/A	#N/A	Atlastin-3	0.0885487	-0.0937097	0.0897694	-0.0598558	0.0799754	-0.0392956	0.00475299	-0.0604273	0.0848807	-0.0495391	26
P22670	RFX1	RFX1	#N/A	#N/A	MHC class II regulatory factor RFX1	-0.179498	-0.111196	-0.0153013	0.169668	0.178492	0.234501	0.300299	0.210514	0.0848467	0.202449	13
P46060	RANGAP1	RANGAP1	#N/A	#N/A	Ran GTPase-activating protein 1	0.165301	0.0607391	0.173511	0.0454429	-0.00996002	-0.0852671	0.141564	0.0816123	0.0846902	-0.0184323	30
Q8IXM3	MRPL41	MRPL41	Known mitochondrial	#N/A	39S ribosomal protein L41, mitochondrial	-0.59658	-0.0669714	0.033652	-0.0356531	0.133827	-0.119808	0.199374	-0.0355644	0.0846086	-0.0771171	7
P84090;G3V279	ERH	ERH	#N/A	#N/A	Enhancer of rudimentary homolog	-0.0359637	0.00848693	0.18574	0.174151	-0.0249862	-0.00549265	0.0462816	0.125916	0.0842208	0.0871233	11
Q99447;I3L1R7;I3L1L9;I3L2Q1	PCYT2	PCYT2	#N/A	#N/A	Ethanolamine-phosphate cytidylyltransferase	0.130799	-0.0039005	-0.0491733	-0.218112	0.206268	0.190678	0.28889	-0.0934788	0.0841935	0.000713933	17
U3KQ69;E9PI62;Q9BT17;E7EVK2	MTG1	MTG1	Known mitochondrial	#N/A	Mitochondrial GTPase 1;Mitochondrial ribosome-associated GTPase 1			0.399773	-0.0452081	-0.320991	-0.089605	0.186881	0.041243	0.0839418	-0.0672358	7
Q86U90	YRDC	YRDC	Known mitochondrial	#N/A	YrdC domain-containing protein, mitochondrial	0.399116	0.31371	0.0858326	0.104202	0.0820213	0.168385	-0.0981812	-0.198941	0.0839282	0.136651	12
P11717	IGF2R	IGF2R	#N/A	#N/A	Cation-independent mannose-6-phosphate receptor	-0.00775365	-0.145462	0.00877379	-0.118429	0.155361	-0.0253532	0.142479	0.0323829	0.0839282	-0.0711408	97
O15379	HDAC3	HDAC3	#N/A	#N/A	Histone deacetylase 3	-0.15563	-0.0396366	0.0515809	0.419539	0.115566	0.0492126	0.0156403	0.280481	0.0839281	0.246226	9
Q5TEC6	HIST2H3PS2	HIST2H3PS2	#N/A	#N/A	Histone H3	-0.112865	-0.129024	0.00158601	-0.122036	0.161694	0.0268709	0.0966667	-0.0399925	0.0838601	-0.0456622	8
Q3ZCW2;U3KQ88	LGALSL	LGALSL	#N/A	#N/A	Galectin-related protein;Galectin	0.299479	0.298776	0.222434	0.101381	-0.0698758	-0.124833	-0.0422042	0.000432815	0.0836695	-0.00729677	8
C9J9K3;A0A0C4DG17;P08865;F8WD59	RPSA	RPSA	#N/A	#N/A	40S ribosomal protein SA	0.206143	0.222434	0.250355	0.249749	-0.105023	0.00590291	-0.174573	0.0756011	0.083581	0.132972	19
Q92890;C9JNP9	UFD1L	UFD1L	#N/A	#N/A	Ubiquitin fusion degradation protein 1 homolog	0.435415	0.250962	0.146264	0.339365	0.0176369	-0.182655	0.117562	0.0521377	0.0833836	0.101838	18
Q9P000	COMMD9	COMMD9	#N/A	#N/A	COMM domain-containing protein 9	0.00259443	0.00504059	0.0124972	0.015212	0.150949	0.0554733	0.0813396	0.0966667	0.0833836	0.0354831	10
P52789;E9PB90	HK2	HK2	Known mitochondrial	#N/A	Hexokinase-2;Hexokinase	-0.0892827	0.0469799	0.0292761	0.148088	0.135141	0.236584	0.350497	0.642748	0.0831793	0.193015	30
A6NHQ2	FBLL1	FBLL1	#N/A	#N/A	rRNA/tRNA 2-O-methyltransferase fibrillarin-like protein 1	0.0183493	0.00633396	-0.0189072	0.131194	0.178364	-0.0182497	0.111432	-0.228638	0.0830976	0.0584065	19
Q14576	ELAVL3	ELAVL3	#N/A	#N/A	ELAV-like protein 3	-0.331754	-0.140142	-0.250028	-0.187674	0.353549	0.0159258	0.332164	-0.124707	0.0830976	-0.0822856	26
Q8WXX5	DNAJC9	DNAJC9	#N/A	#N/A	DnaJ homolog subfamily C member 9	0.323197	0.144177	0.0786098	0.10675	0.0874628	0.14104	0.0894982	0.231678	0.0830431	0.123997	20
Q9Y276;C9J8G3	BCS1L	BCS1L	Known mitochondrial	#N/A	Mitochondrial chaperone BCS1	-0.291398	-0.0289697	-0.0943102	0.018919	0.240864	-0.103317	0.174279	-0.148561	0.0829887	-0.0409049	13
Q00653	NFKB2	NFKB2	#N/A	#N/A	Nuclear factor NF-kappa-B p100 subunit;Nuclear factor NF-kappa-B p52 subunit	0.278223	0.158466	0.0344974	0.0597706	0.129745	-0.0362448	0.0409626	-0.169339	0.0829069	0.0125615	19
Q6YN16	HSDL2	HSDL2	Known mitochondrial	#N/A	Hydroxysteroid dehydrogenase-like protein 2	0.154583	-0.116708	0.161178	0.00144204	-1.44466e-05	-0.140253	0.403049	0.00791302	0.082832	-0.0676666	15
Q32Q12;J3KPD9;P22392;E7ERL0	NME1-NME2;NME2;NME1	NME1-NME2	#N/A	#N/A	Nucleoside diphosphate kinase;Nucleoside diphosphate kinase B	0.242084	0.218843	0.210264	0.243303	-0.0583227	-0.0122717	-0.166924	0.0901759	0.0822121	0.121168	21
G3V5R9;Q07866;G3V2E7;G3V3H3;E7EVH7	KLC1	KLC1	#N/A	#N/A	Kinesin light chain 1	0.0321009	0.0732718	-0.135	-0.0706635	0.270708	-0.0162931	0.111833	-0.184818	0.082069	-0.0432222	52
K7ELL7;P14314	PRKCSH	PRKCSH	#N/A	#N/A	Glucosidase 2 subunit beta	-0.118179	-0.0562512	-0.00669523	0.0097772	0.165044	-0.0532841	-0.0169499	-0.150321	0.0817282	-0.0214089	29
Q9Y2B0	CNPY2	CNPY2	Predicted mitochondrial	#N/A	Protein canopy homolog 2	-0.0624899	-0.140269	-0.0739247	-0.105396	0.222063	0.00805652	0.0549179	-0.122978	0.0816464	-0.0475546	17
P62258	YWHAE	YWHAE	Predicted mitochondrial	#N/A	14-3-3 protein epsilon	0.0816123	0.0556121	0.032242	0.0187766	0.128953	-0.0366147	-0.000360693	-0.0119952	0.0814079	-0.00865319	30
Q14232;F5H0D0	EIF2B1	EIF2B1	#N/A	#N/A	Translation initiation factor eIF-2B subunit alpha	0.147828	0.131326	0.222557	0.133827	-0.0754896	0.067088	-0.166098	-0.0386286	0.0812169	0.100843	20
Q8NFQ8	TOR1AIP2	TOR1AIP2	#N/A	#N/A	Torsin-1A-interacting protein 2	-0.0236364	0.245982	0.165172	0.145351	-0.00797119	-0.0144559	-0.0184396	-0.0803167	0.0811964	0.0676593	11
Q5T5C0	STXBP5	STXBP5	#N/A	#N/A	Syntaxin-binding protein 5	0.520045	-0.215781	-0.25269	-0.492099	0.35208	0.280244	-0.0486062	-0.547447	0.0811555	-0.0548493	7
P62140;E7ETD8;C9JP48;C9J9S3	PPP1CB	PPP1CB	#N/A	#N/A	Serine/threonine-protein phosphatase PP1-beta catalytic subunit;Serine/threonine-protein phosphatase	0.261952	0.00144204	0.126973	0.0164963	0.033652	-0.0415656	0.170951	0.0190613	0.0810669	-0.0122426	28
Q9UQ80;F8VR77	PA2G4	PA2G4	#N/A	#N/A	Proliferation-associated protein 2G4	0.145482	0.0908535	0.144177	0.135009	0.0147838	-0.00458063	-0.0969617	0.0625362	0.0809305	0.066902	42
Q9Y570	PPME1	PPME1	#N/A	#N/A	Protein phosphatase methylesterase 1	0.243791	0.0549179	0.00863037	-0.0581875	0.14965	-0.0406008	0.0723116	0.00245056	0.0808623	-0.0493674	17
Q8N4L2;E5RIY0;E5RFT4	TMEM55A	TMEM55A	#N/A	#N/A	Type 2 phosphatidylinositol 4,5-bisphosphate 4-phosphatase	-0.189499	-0.115441	-0.51379	0.152768	0.5007	-0.0650533	-0.541303	-0.724659	0.0808486	0.0479641	6
P48059;A0A0J9YXC7;A0A0M3HER1	LIMS1	LIMS1	#N/A	#N/A	LIM and senescent cell antigen-like-containing domain protein 1	0.00719549	0.110898	-0.146643	-0.12562	0.277271	0.13947	0.0596321	0.0318186	0.0808282	0.0130048	14
P49354;E9PQP6;B3KVN2	FNTA	FNTA	#N/A	#N/A	Protein farnesyltransferase/geranylgeranyltransferase type-1 subunit alpha	0.250598	0.15562	0.127369	0.100843	0.0326651	0.00317045	0.0460021	0.0156403	0.0807941	0.0528332	16
Q5HYK3;F8VVX6;B4DP72;F8VP53	COQ5	COQ5	Known mitochondrial	#N/A	2-methoxy-6-polyprenyl-1,4-benzoquinol methylase, mitochondrial	0.430714	0.506196	0.240742	0.257856	-0.099139	-0.276835	0.15769	-0.0114134	0.0807872	0.0151407	10
P62195;J3QQM1;J3QSA9;J3KRP2;J3QLH6	PSMC5	PSMC5	#N/A	#N/A	26S protease regulatory subunit 8	0.233888	0.0798389	0.0469799	-0.0150243	0.1129	0.0114957	0.0760118	-0.0660195	0.0803166	-0.00170338	34
A0A494C164;P52630;A0A494C1L3	STAT2	STAT2	#N/A	#N/A	Signal transducer and activator of transcription 2	-0.021614	0.132379	0.361207	0.211261	-0.269199	-0.547995	0.536948	0.313246	0.0801664	-0.118985	8
P25398	RPS12	RPS12	#N/A	#N/A	40S ribosomal protein S12	0.0776532	0.111165	0.207893	0.188528	-0.0603221	0.0229004	-0.22095	0.073546	0.0800095	0.10809	17
Q9UMZ2	SYNRG	SYNRG	#N/A	#N/A	Synergin gamma	-0.450479	-0.211899	-0.16835	-0.385827	0.29125	0.569977	0.168	0.417056	0.0796751	0.169822	8
Q13177	PAK2	PAK2	#N/A	#N/A	Serine/threonine-protein kinase PAK 2;PAK-2p27;PAK-2p34	-0.0451039	0.0881415	0.0829751	0.0976109	0.0762854	-0.0155783	-0.0386878	0.0553346	0.0796341	0.042126	36
A0A087WZ62;Q9H6U8;H0YCW6	ALG9	ALG9	#N/A	#N/A	Alpha-1,2-mannosyltransferase ALG9	0.0663992	-0.120577	0.0129261	0.11836	0.143132	0.0381553	0.0714881	-0.122743	0.0794976	0.0788148	11
Q9H6R0;I3L1L6	DHX33	DHX33	#N/A	#N/A	Putative ATP-dependent RNA helicase DHX33	0.0280033	-0.180544	0.306729	0.435095	-0.190421	-0.0264989	-0.3443	0.0291349	0.0794634	0.222681	11
Q9UIA9;E7ESC6	XPO7	XPO7	#N/A	#N/A	Exportin-7	0.113567	0.00302647	0.0439044	-0.0445682	0.1141	-0.0127228	-0.0823162	0.00216244	0.0794293	-0.0285576	58
A0A0A0MTC1;A0A0A0MTR7;Q63HN8	RNF213	RNF213	#N/A	#N/A	E3 ubiquitin-protein ligase RNF213	-0.205081	-0.228909	0.0903115	-0.232481	0.0684644	-0.242089	0.300768	-0.333607	0.0794293	-0.237277	68
Q92844;E7EQA9;H7BZ28	TANK	TANK	#N/A	#N/A	TRAF family member-associated NF-kappa-B activator	0.221939	-0.342269	-0.0219802	-0.321279	0.172872	0.156008	-0.122381	-0.21058	0.0787328	-0.0629871	7
Q9Y4E6;A2RRE0	WDR7	WDR7	#N/A	#N/A	WD repeat-containing protein 7	0.245374	-0.0632132	-0.22159	-0.274233	0.327112	0.383165	0.256045	0.137766	0.0786918	0.0915916	20
Q15365	PCBP1	PCBP1	#N/A	#N/A	Poly(rC)-binding protein 1	0.207393	0.131458	0.0828389	0.0847447	0.0739573	0.108892	0.1133	0.137504	0.0784049	0.0968691	21
O95219	SNX4	SNX4	#N/A	#N/A	Sorting nexin-4	0.273337	-0.034973	0.0614305	-0.0885615	0.0951818	-0.0840279	-0.0138877	-0.283281	0.0784048	-0.0862929	28
S4R341	NOLC1	NOLC1	#N/A	#N/A		-0.0505473	0.0478175	0.196859	0.261832	-0.0509208	0.00360232	-0.124802	0.210763	0.0782819	0.138487	6
Q4G0F5	VPS26B	VPS26B	#N/A	#N/A	Vacuolar protein sorting-associated protein 26B	-0.0137128	0.000288558	0.0216219	-0.119072	0.132643	-0.101552	0.263996	-0.0248247	0.0781999	-0.110285	19
Q9H9C1;G3V4K3	VIPAS39	VIPAS39	#N/A	#N/A	Spermatogenesis-defective protein 39 homolog	0.0647449	-0.0487703	-0.161169	-0.148657	0.283448	-0.00927745	-0.10911	-0.255908	0.0781999	-0.0772845	16
Q96M27	PRRC1	PRRC1	#N/A	#N/A	Protein PRRC1	0.31904	0.152118	0.167743	0.032524	-0.0182788	0.245982	-0.0694519	0.426104	0.0777283	0.143197	10
O43747	AP1G1	AP1G1	#N/A	#N/A	AP-1 complex subunit gamma-1	0.225768	0.141956	0.0608775	0.101516	0.0942361	-0.0672887	0.0565835	0.0234683	0.0776532	0.019581	37
P55735;A8MXL6	SEC13	SEC13	#N/A	#N/A	Protein SEC13 homolog	0.191057	0.0848807	0.0543624	-0.00842098	0.100574	0.0281448	0.051024	0.013498	0.0776532	0.00997777	18
A0A2R8YG42;Q14155;B1ALK7;E7EUY6	ARHGEF7	ARHGEF7	#N/A	#N/A	Rho guanine nucleotide exchange factor 7	0.223175	0.102188	-0.0368811	-0.155647	0.183201	-0.0536285	0.164529	-0.040304	0.0773524	-0.103736	32
Q9Y5J9;G3XAN8	TIMM8B	TIMM8B	Known mitochondrial	#N/A	Mitochondrial import inner membrane translocase subunit Tim8 B	-0.299134	-0.0059996	0.557778	0.0854246	-0.648213	0.145873	-0.0824384	0.172487	0.0772909	0.115965	6
O43660	PLRG1	PLRG1	#N/A	#N/A	Pleiotropic regulator 1	0.032242	-0.109437	0.209516	0.130799	-0.0685287	0.0543624	0.182057	0.137897	0.0771814	0.0930869	22
Q9BRF8	CPPED1	CPPED1	#N/A	#N/A	Serine/threonine-protein phosphatase CPPED1	0.247806	-0.138013	-0.100345	-0.327023	0.235237	-0.40379	0.211884	-0.0838291	0.0771814	-0.364896	9
Q14697;F5H6X6;E9PKU7	GANAB	GANAB	Predicted mitochondrial	#N/A	Neutral alpha-glucosidase AB	-0.0196383	-0.0234603	0.0705267	0.0241777	0.0837921	-0.13424	-0.021658	-0.156161	0.0771746	-0.0528576	66
Q96K17;E9PL10	BTF3L4	BTF3L4	#N/A	#N/A	Transcription factor BTF3 homolog 4;Transcription factor BTF3	0.0097772	0.0247452	0.18409	0.115699	-0.0389546	-0.152516	-0.0832024	-0.0984592	0.0768738	-0.0121843	8
F8W6N3;Q92560	BAP1	BAP1	#N/A	#N/A	Ubiquitin carboxyl-terminal hydrolase;Ubiquitin carboxyl-terminal hydrolase BAP1			0.240497	-0.466018	-0.107803	-0.688055	0.471864	-0.0207648	0.0768326	-0.572769	7
Q9NYB0	TERF2IP	TERF2IP	#N/A	#N/A	Telomeric repeat-binding factor 2-interacting protein 1	-0.216686	-0.0794171	-0.0032931	-0.0961596	0.152118	0.119821	0.0858326	0.0771063	0.0765044	0.0158686	24
Q9BY32	ITPA	ITPA	#N/A	#N/A	Inosine triphosphate pyrophosphatase	0.347099	0.215989	0.127897	0.0996318	0.0227584	0.0583859	-0.0944643	0.0468402	0.0762855	0.0791562	12
Q9UI12;G3V126	ATP6V1H	ATP6V1H	#N/A	#N/A	V-type proton ATPase subunit H	0.0305479	-0.0143393	-0.0122862	-0.0368367	0.1595	-0.0599761	0.0524158	-0.135269	0.0761622	-0.04836	26
P0C7P0	CISD3	CISD3	Known mitochondrial	#N/A	CDGSH iron-sulfur domain-containing protein 3, mitochondrial	0.0965318	0.0319598	0.503451	0.190172	-0.534746	-0.143707	-0.0740158	-0.0336434	0.0757928	0.0328696	3
Q7L523;Q5VZM0	RRAGA;RRAGB	RRAGA	#N/A	#N/A	Ras-related GTP-binding protein A	-0.0967612	0.00388999	0.295253	-0.185983	-0.183834	-0.475997	-0.0359785	-0.29674	0.0755053	-0.323715	13
Q9UK59	DBR1	DBR1	#N/A	#N/A	Lariat debranching enzyme	0.289008	0.0593554	0.0954519	0.0214797	0.0551957	-0.0161472	0.0617071	0.206268	0.0754642	0.00278892	17
Q9NUD5	ZCCHC3	ZCCHC3	#N/A	#N/A	Zinc finger CCHC domain-containing protein 3	0.326882	-0.00394396	0.0729976	-0.0303982	0.0765591	0.0236102	0.144308	0.0896338	0.0747794	-0.00314128	22
Q16658	FSCN1	FSCN1	#N/A	#N/A	Fascin	0.132379	0.131985	0.0716254	0.0489336	0.0779266	-0.0298974	-0.0622037	0.0415233	0.0747794	0.0100565	53
F8W8I6;P31483;E5RGV5	TIA1	TIA1	#N/A	#N/A	Nucleolysin TIA-1 isoform p40	0.0187766	0.00230651	0.0699771	0.0287106	0.0792927	0.0455827	0.259664	0.360645	0.0746424	0.0371713	18
Q9UJU6;H0Y5J4	DBNL	DBNL	#N/A	#N/A	Drebrin-like protein	0.171847	0.0255958	-0.0468168	-0.0729228	0.186501	0.0628125	0.173639	0.0499095	0.0745534	-0.0034594	29
Q9UNM6;A0A087WUL9;J3KNQ3;E9PL38;H0YD73	PSMD13	PSMD13	#N/A	#N/A	26S proteasome non-ATPase regulatory subunit 13	0.235114	0.0963968	0.0237522	0.00647761	0.123269	0.0432045	0.0270125	-0.0204575	0.0743684	0.0249579	35
Q9UNP9;E9PKY5;E9PEQ6	PPIE	PPIE	#N/A	#N/A	Peptidyl-prolyl cis-trans isomerase E;Peptidyl-prolyl cis-trans isomerase	0.0896338	0.206768	0.0912597	0.218967	0.0571383	0.0231843	0.381505	0.336512	0.0742999	0.124394	11
Q6ZMK1;E9PJD7;E9PQ42	CYHR1	CYHR1	#N/A	#N/A	Cysteine and histidine-rich protein 1	0.387473	-0.653196	0.258338	-0.545845	-0.136854	-0.603709	0.443182	0.128689	0.0742314	-0.574487	5
Q5VIR6;F6VX93;E7EVT8	VPS53	VPS53	#N/A	#N/A	Vacuolar protein sorting-associated protein 53 homolog	0.0861043	-0.0694519	-0.076037	0.0082	0.210015	0.0575542	-0.00200671	0.0690147	0.074067	0.0330881	24
Q14119;J3QSH4;J9JIC7	VEZF1	VEZF1	#N/A	#N/A	Vascular endothelial zinc finger 1	-0.0555763	0.0255958	0.0551957	0.052555	0.0926134	0.063779	-0.0141644	0.0137839	0.0740259	0.0581779	14
[truncated: 4,563 more rows]

## Sheet: Ubiquitome
													Expt 1		Expt 2		Expt 3		Expt 2/3 Average (n=2)
Proteins	Gene names	Mitochondrial (IMPI)	Peroxisomal (peroxismedb)	Protein names	GlyGly (K) Probabilities	Number of GlyGly (K)	Position	Positions within proteins	Localization prob	Localization prob A	Localization prob B	Localization prob C	KO11-AO/DMSO normalized A LOG2	FT385/DMSO normalized A LOG2	KO11-AO/AO normalized B LOG2	FT385-AO/AO normalized B LOG2	KO11-AO/AO normalized C LOG2	FT385-AO/AO normalized C LOG2	KO11-AO/AO Av LOG2	FT385-AO/AO Av LOG2
Q15019;C9JB25;C9J938;C9IZU3;C9JZI2;F8WB65;C9JFT1;A0A1B0GXJ2;C9JT15;C9JSE7	SEPT2			Septin-2	SK(1)QQPTQFINPETPGYVGFANLPNQVHR	1	3	3;3;3;3;3;3;3;3;3;3	1	1		1	0.490159	-0.749984			-0.00805827	-0.688683
Q15019;B5MCX3;H7C2Y0	SEPT2			Septin-2	LLK(1)ASIPFSVVGSNQLIEAK	1	232	232;192;87	0.999999			0.999999					0.156785	-0.248348
Q14141;B1AMS2	SEPT6			Septin-6	STLMDTLFNTK(1)FEGEPATHTQPGVQLQSNTYDLQESNVR	1	66	66;66	1		1	1			-1.63057	-0.0645855	-0.250749	0.399882	-0.781628	0.18626
Q14141	SEPT6			Septin-6	K(1)NNPWLCTE	1	426	426	1	1			0.168514	-1.89362
Q14141;B1AMS2	SEPT6			Septin-6	TAAELLQSQGSQAGGSQTLK(1)R	1	420	420;420	1			1					-1.19093	-1.1942
Q9UHD8;K7EL40;K7EK18;K7EIE4;K7EQD7;K7ER52;K7ELJ9;K7EJZ2;K7EIR4;K7ENQ5;K7EN52;K7EKN4	SEPT9			Septin-9	SITHDIEEK(1)GVR	1	352	352;101;101;101;101;101;101;101;101;101;101;101	1		1	1			-1.2225	-0.0650986	-0.489443	-0.59826	-0.809904	-0.307189
Q9UHD8;K7EL40;K7EK18;K7EIE4;K7EQD7;K7ER52;K7ELJ9;K7EJZ2;K7EIR4;K7ENQ5;K7EN52;K7EKN4;K7ER14;K7EJL9;K7EQ08	SEPT9			Septin-9	NEK(1)APVDFGYVGIDSILEQMR	1	271	271;20;20;20;20;20;20;20;20;20;20;20;88;80;20	1		1	1			0.114234	0.27858	-0.510971	-0.0412538	-0.164763	0.127508
Q9UHD8;K7EPY1;K7ENL0;K7EJV0	SEPT9			Septin-9	ATVASSTQK(1)FQDLGVK	1	62	62;69;47;47	0.999938	0.999938			-1.02971	-0.519363
Q9UHD8;K7EL40;K7EK18	SEPT9			Septin-9	LSK(1)VVNIVPVIAK	1	435	435;184;184	0.999999			0.999999					-1.15541	-0.456445
Q9UHD8	SEPT9			Septin-9	EMIPFAVVGSDHEYQVNGK(1)R	1	511	511	1			1					-0.937519	-0.20136
Q9UHD8;K7EL40;K7EK18;K7EIE4;K7EQD7;K7ER52;K7ELJ9	SEPT9			Septin-9	LTVIDTPGFGDHINNENCWQPIMK(0.973)FINDQYEK(0.027)	1	381	381;130;130;130;130;130;130	0.972557			0.972557					-0.650816	-0.220261
Q9UHD8;K7EL40;K7EK18;K7EIE4;K7EQD7;K7ER52;K7ELJ9	SEPT9			Septin-9	FINDQYEK(1)YLQEEVNINR	1	389	389;138;138;138;138;138;138	1			1					-0.0981194	0.698485
Q9UHD8;K7EL40;K7EK18;K7EIE4;K7EQD7;K7ER52;K7ELJ9;K7EJZ2;K7EIR4;K7ENQ5;K7EN52;K7EKN4;K7ER14;K7EJL9;K7EQ08	SEPT9			Septin-9	DAGLK(1)QAPASR	1	262	262;11;11;11;11;11;11;11;11;11;11;11;79;71;11	1		1				-0.816317	-0.893786
Q9NRG9;H3BU82;F8VZ44	AAAS			Aladin	GGGVTNLLWSPDGSK(1)ILATTPSAVFR	1	301	301;141;177	1		1	1			-2.72404	-0.429965	-0.455119	0.0594937	-1.18311	-0.164577
Q86V21	AACS			Acetoacetyl-CoA synthetase	LQQVVK(1)GLPDLK	1	228	228	0.999547		0.999547	0.967011			-1.87356	-0.459754	-1.31876	-0.113754	-1.56965	-0.276406
Q86V21	AACS			Acetoacetyl-CoA synthetase	QIIAGK(1)AVEQGGAFSNPETLDLYR	1	646	646	1		1	1			-1.71459	-0.279441	-1.28469	-0.126187	-1.48368	-0.20078
Q86V21;E7EW25	AACS			Acetoacetyl-CoA synthetase	GIADVPEWFK(1)GSR	1	95	95;95	1		1	1			-1.49488	-0.100917	-0.533263	0.0261627	-0.935393	-0.0359785
Q86V21;E7EW25	AACS			Acetoacetyl-CoA synthetase	VYDEVVDTSK(1)GIADVPEWFK	1	85	85;85	0.999848			0.999848					-0.282	0.159629
Q6PD74;H0YL49	AAGAB			Alpha- and gamma-adaptin-binding protein p34	HGFELVELSPEELPEEDDDFPESTGVK(1)R	1	160	160;51	1		1	1			-2.04293	-0.50904	-0.282684	-0.397847	-0.909512	-0.452372
Q6PD74	AAGAB			Alpha- and gamma-adaptin-binding protein p34	IVQALNANVWSNVVMK(1)NDR	1	177	177	1		1	1			-2.40507	-0.0114425	-1.02788	-0.216133	-1.55803	-0.11016
Q6PD74;H0YL49	AAGAB			Alpha- and gamma-adaptin-binding protein p34	QK(1)AQEWCIK	1	126	126;17	1		1	1			-1.38994	-0.104604	0.24987	0.187388	-0.348611	0.0487663
E9PG46;Q2M2I8	AAK1			AP2-associated protein kinase 1	DLK(1)VENILLHDR		178	178;178	1			1					0.0040339	-0.238272
E9PG46;Q2M2I8;K4DI97;Q9NSY1	AAK1;BMP2K			AP2-associated protein kinase 1;BMP-2-inducible protein kinase	LHQCK(1)TPIIHR	1	169	169;169;173;173	1		1	1			-1.89727	-0.71248	-0.0237097	-0.335881	-0.675593	-0.511927
P49588	AARS			Alanine--tRNA ligase, cytoplasmic	K(1)IQSLGDSK	1	396	396	1		1	1			-3.14688	-0.544372	-0.366039	0.154324	-1.17005	-0.153134
P49588	AARS			Alanine--tRNA ligase, cytoplasmic	LVSVLQNK(1)MSNYDTDLFVPYFEAIQK	1	254	254	1		1	1			-2.96951	-0.396365	-0.135396	0.113567	-0.946068	-0.118985
P49588;H3BPK7	AARS			Alanine--tRNA ligase, cytoplasmic	AVYTQDCPLAAAK(1)AIQGLR	1	677	677;126	1		1	1			-2.90768	-0.1938	0.0187766	0.156008	-0.80294	-0.00831944
P49588	AARS			Alanine--tRNA ligase, cytoplasmic	ILPGNMK(1)DNFWEMGDTGPCGPCSEIHYDR	1	172	172	1		1				-2.11885	-0.540673
P49588	AARS			Alanine--tRNA ligase, cytoplasmic	AANTQK(1)CIR	1	74	74	1		1				-2.07018	-0.503446
P49588;H3BPK7	AARS			Alanine--tRNA ligase, cytoplasmic	CLSVMEAK(0.773)VK(0.227)	1	780	780;229	0.772731		0.772731				-0.877712	-0.158091
P49588	AARS			Alanine--tRNA ligase, cytoplasmic	EADGILK(0.997)PLPK(0.003)	1	231	231	0.997076		0.997076				-1.77443	-0.0821177
P49588	AARS			Alanine--tRNA ligase, cytoplasmic	DIINEEEVQFLK(1)TLSR	1	384	384	1		1				-2.69928	-0.0820108
Q9BTE6;C9J5N1;K7EQ85	AARSD1;PTGES3L-AARSD1			Alanyl-tRNA editing protein Aarsd1	ILQK(1)NNLNLLR	1	287	287;370;58	1		1	1			-2.52874	-0.409355	-0.549578	-0.241646	-1.22346	-0.323065
Q9BTE6;C9J5N1;K7EQ85	AARSD1;PTGES3L-AARSD1			Alanyl-tRNA editing protein Aarsd1	CGAEDHVEAVK(0.962)K(0.038)	1	276	276;359;47	0.962439		0.962439	0.855101			-1.54435	-0.116285	-0.503466	-0.54595	-0.932003	-0.315181
Q9BTE6;C9J5N1;L7N2F4;K7N799	AARSD1;PTGES3L-AARSD1			Alanyl-tRNA editing protein Aarsd1	SAIELDTPSMTAEQVAAIEQSVNEK(1)IR	1	161	161;244;56;56	1		1	1			-1.74734	-0.122209	-0.584544	-0.179351	-1.05183	-0.150497
Q9BTE6;C9J5N1;K7EQ85	AARSD1;PTGES3L-AARSD1			Alanyl-tRNA editing protein Aarsd1	LQNSTK(1)ILQK	1	283	283;366;54	0.999999		0.999999	0.999982			-1.83846	-0.101026	-0.617012	-0.0751856	-1.10216	-0.0880477
Q9BTE6;C9J5N1;K7EQ85	AARSD1;PTGES3L-AARSD1			Alanyl-tRNA editing protein Aarsd1	ALTALLK(1)CGAEDHVEAVK	1	265	265;348;36	1		1	0.997412			-0.780017	-0.103689	-0.229636	0.0164963	-0.478738	-0.0423454
Q9BTE6;C9J5N1;L7N2F4;K7N799	AARSD1;PTGES3L-AARSD1			Alanyl-tRNA editing protein Aarsd1	LK(1)TTSWELGR	1	126	126;209;21;21	1		1	1					-0.345143	0.0993625
Q9NRN7	AASDHPPT			L-aminoadipate-semialdehyde dehydrogenase-phosphopantetheinyl transferase	DAK(1)AAMAGR	1	58	58	1		1	1			-2.75672	-0.245848	-0.474793	-0.159412	-1.20501	-0.201983
Q9NRN7;E9PNF3;E9PLW6	AASDHPPT			L-aminoadipate-semialdehyde dehydrogenase-phosphopantetheinyl transferase	LVAEK(1)LNIPWNHIR	1	74	74;9;9	1		1	1			-2.29145	0.0903115	0.272382	0.0703893	-0.502188	0.0803848
Q9NRN7;E9PNF3;E9PLW6	AASDHPPT			L-aminoadipate-semialdehyde dehydrogenase-phosphopantetheinyl transferase	LEFDLSPLNLDIGQVYK(1)ETR	1	214	214;149;149	1		1	1			-0.915636	0.073409	1.0207	0.206893	0.355586	0.141694
Q9NRN7	AASDHPPT			L-aminoadipate-semialdehyde dehydrogenase-phosphopantetheinyl transferase	SIQPEEK(1)ER	1	45	45	1		1	1			-1.40003	0.016211	0.295841	0.34426	-0.316061	0.18954
Q9NRN7	AASDHPPT			L-aminoadipate-semialdehyde dehydrogenase-phosphopantetheinyl transferase	HQDVPSQDDSK(1)PTQR	1	263	263	1		1	1			-1.99931	0.097476	0.316262	0.372506	-0.419642	0.241535
Q9NRN7;E9PNF3;E9PLW6	AASDHPPT			L-aminoadipate-semialdehyde dehydrogenase-phosphopantetheinyl transferase	NWALK(1)ESFIK	1	180	180;115;115	0.999995			0.999995					0.262794	0.894837
I3L360;H7C175;Q6ZMQ8	AATK			Serine/threonine-protein kinase LMTK1	SVQLLK(1)STDVGR		75	75;13;116	1			1					0.157302	-0.182279
Q86UK0	ABCA12			ATP-binding cassette sub-family A member 12	VTMETLTK(1)FMQLHFPK(1)TYLK(1)	3	2502	2502	1		1				-1.5845
Q86UK0	ABCA12			ATP-binding cassette sub-family A member 12	VTMETLTK(1)FMQLHFPK(1)TYLK(1)	3	2510	2510	1		1				-1.5845
Q86UK0	ABCA12			ATP-binding cassette sub-family A member 12	VTMETLTK(1)FMQLHFPK(1)TYLK(1)	3	2514	2514	1		1				-1.5845
Q86UK0	ABCA12			ATP-binding cassette sub-family A member 12	AIMEK(1)SNVTLR	1	824	824	1			1					-1.14465	-0.334898
H0Y3H2;Q99758	ABCA3			ATP-binding cassette sub-family A member 3	AVAGK(1)EEEDSDPEK(1)ALR	1;2	445	445;503	1	1	0.999957	0.999997	-1.46144	-0.296669	0.340619	-0.0709514	0.475396	0.317304	0.409581	0.136198
H0Y3H2;Q99758	ABCA3			ATP-binding cassette sub-family A member 3	AVAGK(1)EEEDSDPEK(1)ALR	1;2	454	454;512	1	1			-1.12337	-0.138664
P08183	ABCB1			Multidrug resistance protein 1	YNK(1)NLEEAK	1	279	279	1	1	0.999999	1	-0.65306	0.00891709	0.0352016	-0.173677	-0.0377842	-0.396024	-0.000829788	-0.280571
P08183	ABCB1			Multidrug resistance protein 1	AVK(1)EANAYDFIMK	1	505	505	0.999979	0.999979			-1.00358	0.460376
P08183	ABCB1			Multidrug resistance protein 1	FYDPLAGK(0.999)VLLDGK(0.001)	1	1093	1093	0.998626	0.998626			-1.95143	-0.172571
P08183	ABCB1			Multidrug resistance protein 1	GAAYEIFK(0.801)IIDNK(0.183)PSIDSYSK(0.016)	1	367	367	0.801071	0.801071			-0.801078	-0.188776
P08183	ABCB1			Multidrug resistance protein 1	TVIAFGGQK(0.051)K(0.949)	1	272	272	0.948985	0.948985			-0.471269	0.0511633
P08183	ABCB1			Multidrug resistance protein 1	GAAYEIFK(0.142)IIDNK(0.809)PSIDSYSK(0.049)	1	372	372	0.808966	0.808966		0.730704	-1.14947	-0.197104			0.184852	-0.377482
P08183	ABCB1			Multidrug resistance protein 1	EANAYDFIMK(0.996)LPHK(0.004)FDTLVGER	1	515	515	0.995527	0.995527		0.894611	-0.906521	-0.21885			0.509341	-0.667424
P08183;P21439	ABCB1;ABCB4			Multidrug resistance protein 1;Multidrug resistance protein 3	K(1)GQTLALVGSSGCGK	1	1062	1062;1061	1	1			-1.53533	0.117562
P08183;P21439	ABCB1;ABCB4			Multidrug resistance protein 1;Multidrug resistance protein 3	VGDK(1)GTQLSGGQK	1	1172	1172;1178	1	1			-1.51321	0.336398
H7BXK9;Q9NP58	ABCB6	Known mitochondrial		ATP-binding cassette sub-family B member 6, mitochondrial	EAIIK(1)YQGLEWK	1	330	330;482	0.999969	0.999542	0.999969	0.997493	-0.958533	-0.10642	-0.102326	0.260146	-0.223273	0.162339	-0.161532	0.212071
H7BXK9;Q9NP58	ABCB6	Known mitochondrial		ATP-binding cassette sub-family B member 6, mitochondrial	GGVYADMWQLQQGQEETSEDTK(1)PQTMER	1	684	684;836	1	1	1	1	-0.0288078	0.601887	1.72692	1.24154	0.342669	-0.574261	1.19481	0.602234
H7BXK9;Q9NP58	ABCB6	Known mitochondrial		ATP-binding cassette sub-family B member 6, mitochondrial	AIQASLAK(1)VCANR	1	619	619;771	1	1		1	-0.390094	0.114234			0.767485	-0.467035
B4DGL8;A0A087WW65;O75027;A0A2R8Y473;H7BXK9;Q9NP58	ABCB7;ABCB6	Known mitochondrial		ATP-binding cassette sub-family B member 7, mitochondrial;ATP-binding cassette sub-family B member 6, mitochondrial	GLK(1)LSGGEK	1	574	582;569;608;609;574;726	0.999993	0.999993			-1.4302	-0.308984
Q5T3U5;D6R9B3	ABCC10			Multidrug resistance-associated protein 7	GLSK(1)GFGLATQEPWIQFATIR	1	664	664;220	1			1					1.01278	0.428357
P33897	ABCD1	Predicted mitochondrial	Peroxisomedb	ATP-binding cassette sub-family D member 1	EGGWEAMCDWK(0.976)DVLSGGEK(0.024)	1	602	602	0.976409		0.976409	0.768242			-2.10476	-0.486085	0.0529723	-0.357936	-0.655296	-0.420588
P33897	ABCD1	Predicted mitochondrial	Peroxisomedb	ATP-binding cassette sub-family D member 1	LSLTEEK(1)QR	1	696	696	1		1	1			-2.24325	-0.375946	-0.0788532	-0.191129	-0.78834	-0.28058
P33897	ABCD1	Predicted mitochondrial	Peroxisomedb	ATP-binding cassette sub-family D member 1	ILGGLWPTYGGVLYK(1)PPPQR	1	533	533	1		1	1			-1.82128	-0.392061	-0.0140479	-0.126061	-0.65145	-0.252939
P33897	ABCD1	Predicted mitochondrial	Peroxisomedb	ATP-binding cassette sub-family D member 1	LEQQLAGIPK(1)MQR	1	708	708	1		1	1			-2.32634	-0.357104	0.00748258	0.120086	-0.731458	-0.0988686
P33897	ABCD1	Predicted mitochondrial	Peroxisomedb	ATP-binding cassette sub-family D member 1	DVLSGGEK(1)QR	1	610	610	1		1	1			-2.21491	1.05936	-1.00352	0.511367	-1.48564	0.811224
P33897	ABCD1	Predicted mitochondrial	Peroxisomedb	ATP-binding cassette sub-family D member 1	VEGPLK(1)IR	1	462	462	1			1					-0.0163661	0.103531
Q9UBJ2	ABCD2		Peroxisomedb	ATP-binding cassette sub-family D member 2	DVLSGGEK(1)QR	1	614	614	1		1	1			-2.89271	2.1462	-1.00749	0.47228	-1.66187	1.53951
Q9UBJ2	ABCD2		Peroxisomedb	ATP-binding cassette sub-family D member 2	VELPLSDTLAIK(0.787)GK(0.213)	1	468	468	0.787227			0.787227					-1.82992	-0.300164
Q9UBJ2	ABCD2		Peroxisomedb	ATP-binding cassette sub-family D member 2	EGGWDAVMDWK(0.993)DVLSGGEK(0.007)	1	606	606	0.993155			0.993155					-1.80758	-0.351719
Q9UBJ2	ABCD2		Peroxisomedb	ATP-binding cassette sub-family D member 2	LNELCK(1)ILGEDSVLK	1	722	722	0.999868			0.999868					-1.45364	-0.193255
P28288	ABCD3	Predicted mitochondrial	Peroxisomedb	ATP-binding cassette sub-family D member 3	GISDLVLK(1)EYLDNVQLGHILER	1	543	543	1		1	1			-1.42577	-0.460012	-0.312205	0.0827026	-0.764114	-0.163284
P28288	ABCD3	Predicted mitochondrial	Peroxisomedb	ATP-binding cassette sub-family D member 3	K(1)GISDLVLK	1	535	535	0.999999		0.999999	0.999992			-2.02257	0.265077	-0.843552	0.307895	-1.31583	0.286645
P28288	ABCD3	Predicted mitochondrial	Peroxisomedb	ATP-binding cassette sub-family D member 3	SGANVLICGPNGCGK(1)SSLFR	1	479	479	1		1	1			0.245252	0.458382	0.0918014	0.453333	0.170566	0.45586
P28288	ABCD3	Predicted mitochondrial	Peroxisomedb	ATP-binding cassette sub-family D member 3	LITNSEEIAFYNGNK(1)R	1	286	286	1		1	1			-0.732404	0.769095	-0.382908	0.675906	-0.547099	0.723253
P28288	ABCD3	Predicted mitochondrial	Peroxisomedb	ATP-binding cassette sub-family D member 3	MTITEQK(1)YEGEYR	1	260	260	1	1	1	1	2.58316	1.1932	0.435735	1.1034	0.544683	0.979513	0.491237	1.04278
P28288	ABCD3	Predicted mitochondrial	Peroxisomedb	ATP-binding cassette sub-family D member 3	EGGWDSVQDWMDVLSGGEK(1)QR	1	576	576	1			1					-0.567468	0.231555
P28288	ABCD3	Predicted mitochondrial	Peroxisomedb	ATP-binding cassette sub-family D member 3	DLNHGK(1)YER	1	405	405	1		1	1			-1.23882	0.207393
P61221	ABCE1	Predicted mitochondrial		ATP-binding cassette sub-family E member 1	VALALCLGK(1)PADVYLIDEPSAYLDSEQR	1	478	478	1		1	1			-2.72223	-0.719376	-1.19998	-0.621555	-1.76901	-0.669637
P61221;D6R9I9;D6RGF4;H0Y990	ABCE1	Predicted mitochondrial		ATP-binding cassette sub-family E member 1	AIIK(1)PQYVDQIPK	1	169	169;169;169;102	1		1	1			-2.79226	-0.617521	-1.6027	-0.592702	-2.0782	-0.605058
P61221;D6R9I9	ABCE1	Predicted mitochondrial		ATP-binding cassette sub-family E member 1	VAETANEEEVK(0.999)K(0.001)	1	343	343;343	0.999313		0.999313	0.998501			-2.80723	-0.616437	-1.53809	-0.512719	-2.03738	-0.563646
P61221	ABCE1	Predicted mitochondrial		ATP-binding cassette sub-family E member 1	VIVFDGVPSK(1)NTVANSPQTLLAGMNK	1	541	541	1		0.999819	1			-2.78896	-0.678903	-0.876758	-0.397163	-1.53684	-0.531166
P61221;D6R9I9	ABCE1	Predicted mitochondrial		ATP-binding cassette sub-family E member 1	ADIFMFDEPSSYLDVK(1)QR	1	250	250;250	1		1	1			-2.27984	-0.688125	-0.949645	-0.356255	-1.46658	-0.512668
P61221;D6R9I9;D6RGF4;H0Y990	ABCE1	Predicted mitochondrial		ATP-binding cassette sub-family E member 1	PGEVLGLVGTNGIGK(0.977)STALK(0.023)	1	116	116;116;116;49	0.976905		0.976905	0.968778			-2.49281	-0.958084	-1.08776	-0.161234	-1.6256	-0.505328
P61221	ABCE1	Predicted mitochondrial		ATP-binding cassette sub-family E member 1	IRDAYTHPQFVTDVMK(1)PLQIENIIDQEVQTLSGGELQR	1	447	447	1		1	1			-2.47867	-0.56273	-1.05971	-0.409278	-1.60134	-0.483965
P61221;D6R9I9;D6RGF4;H0Y990	ABCE1	Predicted mitochondrial		ATP-binding cassette sub-family E member 1	QK(0.218)PNLGK(0.782)YDDPPDWQEILTYFR	1	133	133;133;133;66	0.782057		0.782057	0.5			-2.45807	-0.688195	-1.2453	-0.297555	-1.72783	-0.479693
P61221;D6R9I9	ABCE1	Predicted mitochondrial		ATP-binding cassette sub-family E member 1	LK(1)PDEGGEVPVLNVSYKPQK	1	397	397;397	0.999957		0.999957	0.753477			-2.84622	-0.433292	-1.40023	-0.463748	-1.94917	-0.44844
P61221;D6R9I9;D6RGF4;H0Y990	ABCE1	Predicted mitochondrial		ATP-binding cassette sub-family E member 1	GSELQNYFTK(1)ILEDDLK	1	158	158;158;158;91	0.999991		0.999991	0.999988			-2.24216	-0.544792	-1.11366	-0.355313	-1.57027	-0.446944
P61221;D6R9I9;D6RGF4;H0Y990	ABCE1	Predicted mitochondrial		ATP-binding cassette sub-family E member 1	YCANAFK(1)LHR	1	93	93;93;93;26	1		1	1			-0.364162	-0.391153	0.376957	-0.490294	0.0534728	-0.439872
P61221;D6R9I9;D6RGF4;H0Y990	ABCE1	Predicted mitochondrial		ATP-binding cassette sub-family E member 1	ILAGK(1)QKPNLGK	1	126	126;126;126;59	0.999995		0.999995	0.999973			-2.57098	-0.572244	-1.12939	-0.305378	-1.67715	-0.432649
P61221;D6R9I9;D6RGF4;H0Y990	ABCE1	Predicted mitochondrial		ATP-binding cassette sub-family E member 1	ILEDDLK(0.965)AIIK(0.035)PQYVDQIPK	1	165	165;165;165;98	0.964827		0.848943	0.964827			-2.90142	-0.397657	-1.43101	-0.382175	-1.98647	-0.389895
P61221	ABCE1	Predicted mitochondrial		ATP-binding cassette sub-family E member 1	K(1)SGNYFFLDD	1	590	590	1		1	1			-2.11166	-0.68766	-0.86899	-0.134129	-1.36047	-0.384508
P61221	ABCE1	Predicted mitochondrial		ATP-binding cassette sub-family E member 1	QLLHEK(1)IR	1	431	431	1		1	1			-2.9339	-0.515336	-1.28237	-0.258218	-1.88369	-0.381057
P61221;D6R9I9;D6RGF4;H0Y990	ABCE1	Predicted mitochondrial		ATP-binding cassette sub-family E member 1	AAK(1)GTVGSILDR	1	181	181;181;181;114	1		1	1			-2.47201	-0.477141	-1.13546	-0.281334	-1.65419	-0.375918
P61221;D6R9I9;D6RGF4;H0Y990	ABCE1	Predicted mitochondrial		ATP-binding cassette sub-family E member 1	STALK(1)ILAGK	1	121	121;121;121;54	0.999996		0.999996	0.99998			-2.25912	-0.523048	-1.03118	-0.213738	-1.51827	-0.36012
P61221	ABCE1	Predicted mitochondrial		ATP-binding cassette sub-family E member 1	ISPK(1)STGSVR	1	419	419	1		1	1			-2.38594	-0.462595	-1.27526	-0.255615	-1.72626	-0.355396
P61221;D6R9I9	ABCE1	Predicted mitochondrial		ATP-binding cassette sub-family E member 1	MCMYK(1)YPGMK	1	349	349;349	0.999978		0.999903	0.999978			-1.21736	-0.511629	-0.889984	-0.181673	-1.0444	-0.337238
P61221;D6R9I9;D6RGF4;H0Y990	ABCE1	Predicted mitochondrial		ATP-binding cassette sub-family E member 1	DETK(1)TQAIVCQQLDLTHLK	1	195	195;195;195;128	1		1	1			-1.72475	-0.359064	-1.17358	-0.307912	-1.423	-0.333262
P61221	ABCE1	Predicted mitochondrial		ATP-binding cassette sub-family E member 1	INK(1)LNSIK	1	579	579	0.999999		0.999999	0.999999			-2.57458	-0.410889	-1.10709	-0.176071	-1.66178	-0.288708
P61221;D6R9I9;D6RGF4	ABCE1	Predicted mitochondrial		ATP-binding cassette sub-family E member 1	TQAIVCQQLDLTHLK(1)ER	1	210	210;210;210	1		1	1			-2.43503	-0.285425	-1.0994	-0.0760674	-1.61788	-0.176952
P61221;D6R9I9;D6RGF4;H0Y990	ABCE1	Predicted mitochondrial		ATP-binding cassette sub-family E member 1	AIIKPQYVDQIPK(0.951)AAK(0.049)	1	178	178;178;178;111	0.950955		0.945573	0.950955			-2.42492	-0.452215	-1.18092	0.19774	-1.6728	-0.0909412
P61221	ABCE1	Predicted mitochondrial		ATP-binding cassette sub-family E member 1	LNSIK(1)DVEQK	1	584	584	1		1	1			-1.55089	0.127237	-0.728574	0.22033	-1.08192	0.174534
P61221;D6R9I9;D6RGF4;H0Y990	ABCE1	Predicted mitochondrial		ATP-binding cassette sub-family E member 1	GTVGSILDRK(1)DETK	1	191	191;191;191;124	0.999995		0.999954	0.999995			-2.55699	0.216238	-1.45573	0.235605	-1.90374	0.225954
P61221;D6R9I9	ABCE1	Predicted mitochondrial		ATP-binding cassette sub-family E member 1	LK(1)AAITIR	1	254	254;254	1			1					-1.26736	-0.38811
P61221	ABCE1	Predicted mitochondrial		ATP-binding cassette sub-family E member 1	NTVANSPQTLLAGMNK(1)FLSQLEITFR	1	557	557	1		1	1					-1.01864	-0.0972395
H0YGW7;Q8NE71	ABCF1			ATP-binding cassette sub-family F member 1	ELLK(1)QYEK	1	300	300;549	0.999887		0.999887	0.994956			-1.30882	-0.47317	0.132116	-0.38272	-0.41547	-0.427236
H0YGW7;Q8NE71	ABCF1			ATP-binding cassette sub-family F member 1	TTLLK(1)HIANR	1	98	98;347	1		1	1			-1.76444	-0.313423	0.352307	0.239276	-0.348372	-0.0107665
H0YGW7;Q8NE71;Q5STZ8	ABCF1			ATP-binding cassette sub-family F member 1	QVASLK(1)AANAAENDFSVSQAEMSSR	1	26	26;275;276	1		1	1			-1.39426	-0.2567	0.400647	0.307662	-0.234007	0.0529027
H0YGW7;Q8NE71	ABCF1			ATP-binding cassette sub-family F member 1	ATGAAAAEAK(1)AR	1	181	181;430	1		1	1			-1.51099	-0.0432296	0.511569	0.254715	-0.170987	0.11342
H0YGW7;Q8NE71	ABCF1			ATP-binding cassette sub-family F member 1	ICIVGPNGVGK(1)STLLLLLTGK	1	415	415;664	0.999917		0.999917	0.999677			-1.47887	-0.0248394	0.509442	0.307195	-0.166284	0.150709
H0YGW7;Q8NE71	ABCF1			ATP-binding cassette sub-family F member 1	LK(1)IGFFNQQYAEQLR	1	440	440;689	1		1	1			-1.83028	-0.279319	0.33674	0.917241	-0.373224	0.439613
H0YGW7;Q8NE71	ABCF1			ATP-binding cassette sub-family F member 1	FTFPDPPPLSPPVLGLHGVTFGYQGQK(0.214)PLFK(0.786)	1	393	393;642	0.786416			0.786416					0.239887	-0.0613303
H0YGW7;Q8NE71	ABCF1			ATP-binding cassette sub-family F member 1	ILAGLGFDPEMQNRPTQK(1)FSGGWR	1	202	202;451	1			1					0.386038	0.0885487
H0YGW7;Q8NE71	ABCF1			ATP-binding cassette sub-family F member 1	NQDEESQEAPELLK(0.862)RPK(0.138)	1	354	354;603	0.862208		0.862208				-2.30764	-0.565801
H0YGW7;Q8NE71;Q5STZ8	ABCF1			ATP-binding cassette sub-family F member 1	K(1)QMEYER	1	14	14;263;264	1		1				-0.55241	-0.386808
H0YGW7;Q8NE71	ABCF1			ATP-binding cassette sub-family F member 1	FTFPDPPPLSPPVLGLHGVTFGYQGQK(0.992)PLFK(0.008)	1	389	389;638	0.992227		0.992227				-1.78931	-0.13005
Q9UG63	ABCF2	Predicted mitochondrial		ATP-binding cassette sub-family F member 2	YHQHLQEQLDLDLSPLEYMMK(0.923)CYPEIK(0.077)	1	485	485	0.922971		0.90397	0.922971			-2.35225	-0.210997	-0.688264	-0.125699	-1.29258	-0.167718
Q9UG63	ABCF2	Predicted mitochondrial		ATP-binding cassette sub-family F member 2	STLLK(1)LLTGELLPTDGMIR	1	441	441	1		1	1			-2.44309	-0.00096693	-0.775293	-0.0736665	-1.38052	-0.0368588
Q9UG63	ABCF2	Predicted mitochondrial		ATP-binding cassette sub-family F member 2	YGLTGK(1)QQVSPIR	1	508	508	1		1	1			-2.37842	-0.0769649	-0.963391	0.0240359	-1.50396	-0.0255808
Q9UG63	ABCF2	Predicted mitochondrial		ATP-binding cassette sub-family F member 2	TRLELEENQMK(1)R	1	326	326	1		1	1			-1.97324	-0.0420705	-0.561984	0.0179219	-1.10152	-0.0117625
Q9UG63	ABCF2	Predicted mitochondrial		ATP-binding cassette sub-family F member 2	VALVGPNGAGK(1)STLLK	1	436	436	0.999996		0.999996	0.980977			-2.29265	-0.0910181	-0.751684	0.13711	-1.32552	0.0275504
Q9UG63	ABCF2	Predicted mitochondrial		ATP-binding cassette sub-family F member 2	FGHGSAK(1)LAR	1	351	351	1		1	1			-2.36446	-0.127037	-0.809524	0.19131	-1.38692	0.0408994
Q9UG63	ABCF2	Predicted mitochondrial		ATP-binding cassette sub-family F member 2	SK(1)LVDEEPQLTK	1	608	608	1		1	1			-0.999048	0.0880059	-0.651609	0.0842004	-0.814895	0.0861044
Q9UG63;C9JHK9;C9JZV3	ABCF2	Predicted mitochondrial		ATP-binding cassette sub-family F member 2	AMLEK(1)EAER	1	174	174;174;174	1		1	1			-2.25746	-0.075064	-0.484691	0.332622	-1.11436	0.143132
Q9UG63	ABCF2	Predicted mitochondrial		ATP-binding cassette sub-family F member 2	TLQK(1)MMASGLTER	1	365	365	1		1	1			0.0554733	0.230941	0.302758	0.105678	0.184407	0.169668
Q9UG63	ABCF2	Predicted mitochondrial		ATP-binding cassette sub-family F member 2	LVDEEPQLTK(1)R	1	618	618	1		1	1			-1.98068	0.0500489	0.619929	0.423847	-0.159903	0.249021
Q9UG63	ABCF2	Predicted mitochondrial		ATP-binding cassette sub-family F member 2	YYTGNYDQYVK(1)TR	1	315	315	1		1	1			-1.80748	0.123401	0.183455	0.432211	-0.492799	0.286053
Q9UG63	ABCF2	Predicted mitochondrial		ATP-binding cassette sub-family F member 2	FHWEQDQIAHMK(1)NYIAR	1	339	339	1		1	1			-2.06951	0.420725	-0.288558	0.363564	-0.920079	0.392427
Q9UG63;C9JHK9;C9JZV3	ABCF2	Predicted mitochondrial		ATP-binding cassette sub-family F member 2	ELEDFEMK(0.997)K(0.003)	1	66	66;66;66	0.996568		0.996568	0.954003			-1.63115	1.88979	-0.072771	1.03309	-0.651042	1.52411
Q9UG63	ABCF2	Predicted mitochondrial		ATP-binding cassette sub-family F member 2	WPGDILAYK(1)EHLK	1	602	602	0.999955		0.999819	0.999955					-0.722563	0.0224743
Q9UG63	ABCF2	Predicted mitochondrial		ATP-binding cassette sub-family F member 2	TLSFYFPPCGK(0.999)IPPPVIMVQNVSFK(0.001)	1	390	390	0.998637			0.998637					-0.579167	-0.370154
Q9NUQ8	ABCF3			ATP-binding cassette sub-family F member 3	ASQVQSK(1)LK	1	457	457	0.999597		0.999564	0.999597			-2.48068	0.424062	-0.366894	-1.74178	-1.06702	-0.285689
Q9NUQ8	ABCF3			ATP-binding cassette sub-family F member 3	ASVILAGLGFTPK(1)MQQQPTR	1	319	319	1		1	1			-2.07254	-0.257356	-0.489322	-0.027175	-1.07385	-0.13768
Q9NUQ8	ABCF3			ATP-binding cassette sub-family F member 3	STMLK(1)LLLGDLAPVR	1	536	536	1		1	1			-1.54865	0.0977456	-0.293713	-0.115769	-0.788826	-0.00506553
Q9NUQ8	ABCF3			ATP-binding cassette sub-family F member 3	ICVVGENGAGK(1)STMLK	1	531	531	0.999978		0.999978	0.999726			-1.11751	0.051024	0.000721167	-0.0118789	-0.452659	0.0199154
Q9NUQ8	ABCF3			ATP-binding cassette sub-family F member 3	NGLGK(1)TTLLK	1	216	216	1			1					-0.533263	-0.158236
Q9NUQ8	ABCF3			ATP-binding cassette sub-family F member 3	NGLGK(0.179)TTLLK(0.821)	1	221	221	0.821145		0.821145				-2.13892	0.00317044
Q96IU4;F8W9U3	ABHD14B			Alpha/beta hydrolase domain-containing protein 14B	TPALIVYGDQDPMGQTSFEHLK(1)QLPNHR	1	173	173;171	1			1					0.319271	0.262193
H3BMT2;H3BUZ6;P08910	ABHD2			Abhydrolase domain-containing protein 2	FLLK(0.986)SCPLLTK(0.014)	1	57	57;57;57	0.986422	0.986422			-2.23888	-0.252638
J3KSP1;J3KTE1;Q8WU67	ABHD3			Phospholipase ABHD3	HMFVK(1)QVDMDHVMK	1	93	93;235;288	0.999995	0.999995			-0.919997	-0.664883
Q9BV23	ABHD6			Monoacylglycerol lipase ABHD6	FK(1)VPQQILQGLVDVR	1	223	223	1		1	1			-1.514	-0.580849	-0.214726	-0.774256	-0.722789	-0.674314
P42684	ABL2			Abelson tyrosine-protein kinase 2	NCLVGENHVVK(1)VADFGLSR	1	424	424	1		1	1			-1.75438	-0.207128	0.505383	-0.164965	-0.221035	-0.185893
A0A1C7CYZ0;Q12979;A0A0G2JQ41;B7Z683;I3L0R7	ABR			Active breakpoint cluster region-related protein	MK(1)ISALK	1	395	395;383;301;165;50	1		1	1			-1.77167	-0.18449	0.154842	0.0756011	-0.508229	-0.0485912
A0A1C7CYZ0;Q12979;A0A0G2JQ41;A0A0G2JRJ1;I3L3W0;I3L2P5	ABR			Active breakpoint cluster region-related protein	AFVDNYK(1)VALETAEK	1	204	204;192;110;77;113;102	0.999993		0.999987	0.999993			-1.32496	-0.277237	-0.0871662	0.183328	-0.577196	-0.0286533
A0A1C7CYZ0;Q12979;A0A0G2JQ41;A0A0G2JRJ1;I3L3W0;I3L2P5	ABR			Active breakpoint cluster region-related protein	VALETAEK(1)CSQSNNQFQK	1	212	212;200;118;85;121;110	1		1	1			-1.44238	0.446468	-0.0153305	0.374177	-0.559165	0.410775
A0A1C7CYZ0;Q12979;I3L259;I3L2L3;A0A0G2JQB5;I3L4Y1	ABR			Active breakpoint cluster region-related protein	SQGGGDGVSPTPPEGLAPGVEAGK(1)GLEMR	1	99	99;87;41;41;41;346	1		1	1					-0.390264	-0.391512
A0A1C7CYZ0;Q12979;A0A0G2JQ41;B7Z683;I3L0R7	ABR			Active breakpoint cluster region-related protein	K(1)MFENEFLLLLNSPTIPFR	1	422	422;410;328;192;77	1			1					0.0867838	-0.294703
A0A1C7CYZ0;Q12979;A0A0G2JQ41;B7Z683;I3L0R7;A0A0G2JSE0;A0A0D9SGD7	ABR			Active breakpoint cluster region-related protein	EAIQK(0.985)LQK(0.015)	1	468	468;456;374;238;123;23;23	0.98528			0.98528					0.517427	0.706287
A0A1C7CYZ0;Q12979;A0A0G2JQ41;B7Z683;P11274;I3L379;I3L2C0	ABR;BCR			Active breakpoint cluster region-related protein;Breakpoint cluster region protein	K(1)QTGVFGVK	1	652	652;640;558;422;1047;98;91	1			1					-0.779101	-0.38862
Q13085;Q59FY4;A0A087WWN5	ACACA			Acetyl-CoA carboxylase 1;Biotin carboxylase	YLYLTPQDYK(1)R	1	1759	1759;411;32	1		1	1			-1.74043	0.0315364	-0.279301	0.352081	-0.832295	0.200693
Q13085;O00763	ACACA;ACACB			Acetyl-CoA carboxylase 1;Biotin carboxylase;Acetyl-CoA carboxylase 2;Biotin carboxylase	ITSENPDEGFK(1)PSSGTVQELNFR	1	520	520;663	1			1					-0.0456548	0.116099
Q13085;O00763;Q59FY4;F8W8T8;H0YGH5	ACACA;ACACB			Acetyl-CoA carboxylase 1;Biotin carboxylase;Acetyl-CoA carboxylase 2;Biotin carboxylase	EFPK(1)FFTFR	1	1354	1354;1473;55;139;140	1		1				-1.55745	-0.389867
Q13085;O00763;A0A087X0W4;S4R3S7	ACACA;ACACB			Acetyl-CoA carboxylase 1;Biotin carboxylase;Acetyl-CoA carboxylase 2;Biotin carboxylase	FVVMVTPEDLK(0.017)ANAEYIK(0.983)	1	170	170;312;92;110	0.98308		0.98308				0.277747	-0.377463
Q9BWD1	ACAT2			Acetyl-CoA acetyltransferase, cytosolic	IVSWSQVGVEPSIMGIGPIPAIK(0.997)QAVTK(0.003)	1	302	302	0.997425		0.997425	0.726504			-2.68094	-0.16728	-0.32925	-0.0245606	-1.07113	-0.0941562
Q9BWD1	ACAT2			Acetyl-CoA acetyltransferase, cytosolic	TIIGSFNGALAAVPVQDLGSTVIK(0.864)EVLK(0.136)R	1	39	39	0.863906			0.863906					-0.154811	-0.62311
Q9H3P7	ACBD3	Known mitochondrial		Golgi resident protein GCP60	NANK(1)PLLDEIVPVYRR	1	473	473	1		1	1			-2.74246	-0.420202	-0.406063	-0.269686	-1.14543	-0.342982
Q9H3P7	ACBD3	Known mitochondrial		Golgi resident protein GCP60	EK(1)IQQDADSVITVGR	1	386	386	1		1	1			-1.08479	-0.0822398	-0.0540927	-0.307966	-0.479291	-0.190693
Q9H3P7	ACBD3	Known mitochondrial		Golgi resident protein GCP60	SK(1)SVYYR	1	518	518	1		1	1			-1.99326	-0.244873	0.218099	-0.100128	-0.49984	-0.170686
Q9H3P7	ACBD3	Known mitochondrial		Golgi resident protein GCP60	K(0.967)NANK(0.033)PLLDEIVPVYR	1	469	469	0.9671		0.9671	0.5			-2.59388	-0.0745626	-0.556712	0.224287	-1.24214	0.0825868
Q9H3P7	ACBD3	Known mitochondrial		Golgi resident protein GCP60	QQEVVVAGSSLPTSSK(1)VNATVPSNMMSVNGQAK	1	322	322	0.999581	0.999581		0.999102	-0.315181	-1.3148			0.443607	-0.385714
Q9H3P7	ACBD3	Known mitochondrial		Golgi resident protein GCP60	ESLPVIAAPSMWTRPQIK(0.843)DFK(0.157)	1	381	381	0.843277		0.843277				-2.60016	-0.54829
X6RDD7;Q5T8E0;B7Z2R7;Q5T8D3	ACBD5		Peroxisomedb	Acyl-CoA-binding domain-containing protein 5	VIQSLPK(0.812)NGSFQPTNEMMLK(0.188)	1	24	24;24;57;57	0.812211			0.812211					0.0373119	0.350045
A0A2R8Y544;Q9BR61	ACBD6			Acyl-CoA-binding domain-containing protein 6	K(1)LDPGWNPQIPEKK	1	120	120;120	1		1	0.559503			-2.28842	-0.301479	-0.825773	-0.480257	-1.37917	-0.388101
A0A2R8Y544;Q9BR61	ACBD6			Acyl-CoA-binding domain-containing protein 6	SK(1)NVDVNVKDEEGR	1	181	181;181	1		1	0.992779			-1.68864	-0.269634	-0.204649	-0.0920633	-0.763697	-0.178118
A0A2R8Y544;Q9BR61	ACBD6			Acyl-CoA-binding domain-containing protein 6	NVDVNVK(1)DEEGR	1	188	188;188	1		1	1			-0.588747	-0.0121844	-0.0508162	-0.132056	-0.294854	-0.0708756
A0A2R8Y544;Q9BR61	ACBD6			Acyl-CoA-binding domain-containing protein 6	ENNIDHITK(0.018)AIK(0.982)	1	179	179;179	0.981609			0.981609					-0.812663	-0.443968
A0A2R8Y544;Q9BR61	ACBD6			Acyl-CoA-binding domain-containing protein 6	KLDPGWNPQIPEK(0.956)K(0.044)	1	132	132;132	0.956434			0.956434					-0.802109	-0.258788
A0A2R8Y544;Q9BR61	ACBD6			Acyl-CoA-binding domain-containing protein 6	WEAWK(1)ALGDSSPSQAMQEYIAVVK	1	100	100;100	0.999933			0.999933					-0.197765	-0.461204
A0A2R8Y544;Q9BR61	ACBD6			Acyl-CoA-binding domain-containing protein 6	QK(1)WEAWK	1	95	95;95	1		1				-2.67208	1.5674
P53396	ACLY	Known mitochondrial		ATP-citrate synthase	GVTIIGPATVGGIK(0.985)PGCFK(0.015)	1	630	630	0.9854	0.905848	0.9854	0.820668	-0.100391	-0.0346775	0.130272	0.0742314	0.00891709	-0.295394	0.0708701	-0.0987759
P53396	ACLY	Known mitochondrial		ATP-citrate synthase	SLQGK(1)STTLFSR	1	488	488	1	1			-1.28796	0.0216219
P53396	ACLY	Known mitochondrial		ATP-citrate synthase	VQILK(1)DYVR	1	991	991	1	1			-1.37557	-0.18531
P53396	ACLY	Known mitochondrial		ATP-citrate synthase	LK(1)QGLYR	1	1080	1080	1		1				-0.699255	-0.571793
O00154;K7EKP8	ACOT7	Known mitochondrial		Cytosolic acyl coenzyme A thioester hydrolase	ATLWYVPLSLK(0.134)NVDK(0.866)	1	172	172;113	0.865586	0.554673	0.721911	0.865586	-0.374243	-0.859614	-0.804501	0.347439	0.44074	-0.71241	-0.0515038	-0.0872735
O00154;K7EKP8	ACOT7	Known mitochondrial		Cytosolic acyl coenzyme A thioester hydrolase	YEAQK(1)LER	1	198	198;139	1		1	1			-0.326516	0.414785	2.01314	0.604451	1.27324	0.512733
O00154	ACOT7	Known mitochondrial		Cytosolic acyl coenzyme A thioester hydrolase	YLQMK(0.91)AK(0.09)	1	369	369	0.910299			0.910299					1.26466	-0.15404
P13686	ACP5			Tartrate-resistant acid phosphatase type 5	K(1)VPNGYLR	1	273	273	1	1			-0.0845326	0.475811
P33121;B7Z3Z9;E7EPM6;D6RER0	ACSL1	Known mitochondrial	Peroxisomedb	Long-chain-fatty-acid--CoA ligase 1	AK(1)LLLEGVENK	1	207	207;36;173;207	0.999997		0.999997	0.999992			1.16717	-0.462316	-0.154891	-0.933931	0.652555	-0.678938
P33121;D6RER0	ACSL1	Known mitochondrial	Peroxisomedb	Long-chain-fatty-acid--CoA ligase 1	K(0.007)PDQPYEWLSYK(0.993)QVAELSECIGSALIQK	1	124	124;124	0.992757		0.976878	0.992757			0.854315	0.0219061	0.263275	-0.434988	0.588853	-0.188529
P33121;B7Z3Z9;E7EPM6;D6RER0;H0Y9Z9	ACSL1	Known mitochondrial	Peroxisomedb	Long-chain-fatty-acid--CoA ligase 1	LLMDDLK(1)VLQPTVFPVVPR	1	356	356;185;322;356;78	1		1	1			-1.25017	0.573375	-0.158606	-0.195054	-0.603523	0.239728
P33121;B7Z3Z9;E7EPM6	ACSL1	Known mitochondrial	Peroxisomedb	Long-chain-fatty-acid--CoA ligase 1	WLLDFASK(1)R	1	395	395;224;361	1		1	1					0.0988238	0.111566
P33121;B7Z3Z9;E7EPM6;D6RER0	ACSL1	Known mitochondrial	Peroxisomedb	Long-chain-fatty-acid--CoA ligase 1	LLLEGVENK(0.886)LIPGLK(0.114)	1	216	216;45;182;216	0.886347	0.872718		0.886347	0.620117	0.509747			0.224164	0.547055
O95573	ACSL3	Known mitochondrial	Peroxisomedb	Long-chain-fatty-acid--CoA ligase 3	WLCTGDIGEFEPDGCLK(1)IIDR	1	575	575	1		1	1			-1.76449	-0.0563712	-0.203552	0.219339	-0.782471	0.0880602
O95573;C9JC11;F5H062	ACSL3	Known mitochondrial	Peroxisomedb	Long-chain-fatty-acid--CoA ligase 3	AK(0.002)PVNSK(0.998)PDSAYR	1	63	63;63;63	0.998417			0.998417					-0.363197	0.595599
O95573	ACSL3	Known mitochondrial	Peroxisomedb	Long-chain-fatty-acid--CoA ligase 3	VLSEAAISASLEK(0.006)FEIPVK(0.994)IR	1	679	679	0.994294		0.994294				-1.79061	0.077243
O95573	ACSL3	Known mitochondrial	Peroxisomedb	Long-chain-fatty-acid--CoA ligase 3	TK(1)ADFFEDENGQR	1	547	547	1		1				-1.20354	0.266637
O60488	ACSL4	Known mitochondrial	Peroxisomedb	Long-chain-fatty-acid--CoA ligase 4	IGYSSPLTLSDQSSK(0.979)IK(0.021)	1	354	354	0.979325		0.786005	0.979325			-1.30543	-0.0961288	-0.766186	-0.180332	-1.01076	-0.137616
O60488;H0Y9A0	ACSL4	Known mitochondrial	Peroxisomedb	Long-chain-fatty-acid--CoA ligase 4	K(1)GYDAPLCNLLLFK	1	413	413;17	1		1	0.999999			-2.42787	-0.115347	-0.996743	-0.144887	-1.54168	-0.130042
O60488	ACSL4	Known mitochondrial	Peroxisomedb	Long-chain-fatty-acid--CoA ligase 4	GDCTVLK(1)PTLMAAVPEIMDR	1	367	367	1		1	1			-2.05769	0.00604663	-0.598457	-0.271653	-1.15095	-0.126132
O60488	ACSL4	Known mitochondrial	Peroxisomedb	Long-chain-fatty-acid--CoA ligase 4	EAANAMK(1)LER	1	661	661	1		1	1			-1.00214	0.130272	-0.481082	0.347325	-0.718213	0.242877
O60488	ACSL4	Known mitochondrial	Peroxisomedb	Long-chain-fatty-acid--CoA ligase 4	FEIPIK(1)VR	1	670	670	1			1					-0.451603	-0.798316
P68133;P68032;P63267;P62736;A6NL76;F8WB63;B8ZZJ2;C9JFL5;F6UVQ4;F6QUT6	ACTA1;ACTC1;ACTG2;ACTA2			Actin, alpha skeletal muscle;Actin, alpha cardiac muscle 1;Actin, gamma-enteric smooth muscle;Actin, aortic smooth muscle	GILTLK(1)YPIEHGIITNWDDMEK	1	70	70;70;69;70;70;69;69;69;70;70	0.999999	0.957014	0.999999	0.999999	1.92888	-0.00418989	-1.95579	-0.0916636	0.451224	0.499068	-0.299578	0.233729
C9JUM1;C9JZR7;C9JTX5;P60709;A0A2R8Y793;G5E9R0;E7EVS6;A0A2R8YGF8	ACTB	Known mitochondrial		Actin, cytoplasmic 1;Actin, cytoplasmic 1, N-terminally processed	DDDIAALVVDNGSGMCK(1)AGFAGDDAPR	1	18	18;18;18;18;18;18;18;18	1	1	1	1	1.94531	-0.066231	-1.36769	0.135798	0.0504669	0.366028	-0.490953	0.255501
P60709;A0A2R8YFE2;Q562R1;P63261;P68133;P68032;P63267;P62736;A6NL76	ACTB;ACTBL2;ACTG1;ACTA1;ACTC1;ACTG2;ACTA2	Known mitochondrial		Actin, cytoplasmic 1;Actin, cytoplasmic 1, N-terminally processed;Beta-actin-like protein 2;Actin, cytoplasmic 2;Actin, cytoplasmic 2, N-terminally processed;Actin, alpha skeletal muscle;Actin, alpha cardiac muscle 1;Actin, gamma-enteric smooth muscle;Actin, aortic smooth muscle	IK(1)IIAPPER	1	328	328;32;329;328;330;330;329;330;207	1	1	1	1	1.10239	0.112367	-1.80103	-0.12356	0.434455	0.410558	-0.287739	0.168077
P60709;A0A2R8Y793;A0A2R8YEA7;Q562R1;P63261;I3L3I0;I3L1U9;I3L4N8;P68133;P68032;P63267;P62736	ACTB;ACTBL2;ACTG1;ACTA1;ACTC1;ACTG2;ACTA2	Known mitochondrial		Actin, cytoplasmic 1;Actin, cytoplasmic 1, N-terminally processed;Beta-actin-like protein 2;Actin, cytoplasmic 2;Actin, cytoplasmic 2, N-terminally processed;Actin, alpha skeletal muscle;Actin, alpha cardiac muscle 1;Actin, gamma-enteric smooth muscle;Actin, aortic smooth muscle	LDLAGRDLTDYLMK(1)ILTER	1	191	191;175;69;192;191;191;191;182;193;193;192;193	1	1	1	1	0.575119	-0.240401	0.443607	0.227741	0.415326	0.608715	0.429536	0.430767
P60709;A0A2R8YFE2;Q562R1;P63261;P68133;P68032;P63267;P62736;A6NL76	ACTB;ACTBL2;ACTG1;ACTA1;ACTC1;ACTG2;ACTA2	Known mitochondrial		Actin, cytoplasmic 1;Actin, cytoplasmic 1, N-terminally processed;Beta-actin-like protein 2;Actin, cytoplasmic 2;Actin, cytoplasmic 2, N-terminally processed;Actin, alpha skeletal muscle;Actin, alpha cardiac muscle 1;Actin, gamma-enteric smooth muscle;Actin, aortic smooth muscle	IK(0.2)IIAPPERK(0.8)	1	336	336;40;337;336;338;338;337;338;215	0.799655			0.799655					0.438612	0.619742
P60709;A0A2R8Y793;P63261	ACTB;ACTG1	Known mitochondrial		Actin, cytoplasmic 1;Actin, cytoplasmic 1, N-terminally processed;Actin, cytoplasmic 2;Actin, cytoplasmic 2, N-terminally processed	FRCPEALFQPSFLGMESCGIHETTFNSIMK(1)CDVDIR	1	284	284;268;284	1		1	1			-1.38854	-0.303454	0.500394	-0.159428	-0.154771	-0.229645
P60709;A0A2R8Y793;G5E9R0;E7EVS6;A0A2R8YGF8;P63261;I3L3I0;I3L1U9;I3L4N8;I3L3R2;J3KT65	ACTB;ACTG1	Known mitochondrial		Actin, cytoplasmic 1;Actin, cytoplasmic 1, N-terminally processed;Actin, cytoplasmic 2;Actin, cytoplasmic 2, N-terminally processed	VAPEEHPVLLTEAPLNPK(1)ANR	1	113	113;113;113;113;113;113;113;113;104;113;113	1	1	1	1	1.50523	-0.349199	-1.51157	-0.0661253	0.256528	0.400757	-0.372085	0.18612
P60709;A0A2R8Y793;P63261	ACTB;ACTG1	Known mitochondrial		Actin, cytoplasmic 1;Actin, cytoplasmic 1, N-terminally processed;Actin, cytoplasmic 2;Actin, cytoplasmic 2, N-terminally processed	K(1)DLYANTVLSGGTTMYPGIADR	1	291	291;275;291	1	1	1	1	1.08542	0.0267293	-1.28564	0.00561557	0.562084	0.366924	-0.0842191	0.197551
P60709;A0A2R8YFE2;P63261;P68133;P68032;P63267;P62736;A6NL76	ACTB;ACTG1;ACTA1;ACTC1;ACTG2;ACTA2	Known mitochondrial		Actin, cytoplasmic 1;Actin, cytoplasmic 1, N-terminally processed;Actin, cytoplasmic 2;Actin, cytoplasmic 2, N-terminally processed;Actin, alpha skeletal muscle;Actin, alpha cardiac muscle 1;Actin, gamma-enteric smooth muscle;Actin, aortic smooth muscle	EITALAPSTMK(0.979)IK(0.021)	1	326	326;30;326;328;328;327;328;205	0.978564	0.965875	0.924674	0.978564	0.704695	0.380619	-1.27261	-0.209178	0.116099	0.0816123	-0.417242	-0.0564687
P60709;A0A2R8YFE2;P63261;P68133;P68032;P63267;P62736;A6NL76	ACTB;ACTG1;ACTA1;ACTC1;ACTG2;ACTA2	Known mitochondrial		Actin, cytoplasmic 1;Actin, cytoplasmic 1, N-terminally processed;Actin, cytoplasmic 2;Actin, cytoplasmic 2, N-terminally processed;Actin, alpha skeletal muscle;Actin, alpha cardiac muscle 1;Actin, gamma-enteric smooth muscle;Actin, aortic smooth muscle	MQK(1)EITALAPSTMK	1	315	315;19;315;317;317;316;317;194	1	1	1	1	1.05589	0.954122	-1.32013	0.105276	0.269751	0.320773	-0.316438	0.217045
C9JUM1;C9JZR7;C9JTX5;P60709;A0A2R8Y793;G5E9R0;E7EVS6;A0A2R8YGF8;P63261;I3L3I0;I3L1U9;I3L4N8;I3L3R2;J3KT65;K7EM38;P68133;P68032;P63267;P62736;A6NL76;F8WB63;B8ZZJ2;C9JFL5;F6UVQ4;F6QUT6	ACTB;ACTG1;ACTA1;ACTC1;ACTG2;ACTA2	Known mitochondrial		Actin, cytoplasmic 1;Actin, cytoplasmic 1, N-terminally processed;Actin, cytoplasmic 2;Actin, cytoplasmic 2, N-terminally processed;Actin, alpha skeletal muscle;Actin, alpha cardiac muscle 1;Actin, gamma-enteric smooth muscle;Actin, aortic smooth muscle	HQGVMVGMGQK(1)DSYVGDEAQSK(1)R	1;2	61	61;61;61;61;61;61;61;61;61;61;61;52;61;61;61;63;63;62;63;63;62;62;62;63;63	1	1	1	1	1.19837	-0.226949	-1.5481	-0.0205892	0.344601	0.509949	-0.311363	0.268931
C9JUM1;C9JZR7;C9JTX5;P60709;A0A2R8Y793;G5E9R0;E7EVS6;A0A2R8YGF8;P63261;I3L3I0;I3L1U9;I3L3R2;J3KT65;K7EM38;P68133;P68032;P63267;P62736;A6NL76;F8WB63;B8ZZJ2;C9JFL5;F6UVQ4;F6QUT6	ACTB;ACTG1;ACTA1;ACTC1;ACTG2;ACTA2	Known mitochondrial		Actin, cytoplasmic 1;Actin, cytoplasmic 1, N-terminally processed;Actin, cytoplasmic 2;Actin, cytoplasmic 2, N-terminally processed;Actin, alpha skeletal muscle;Actin, alpha cardiac muscle 1;Actin, gamma-enteric smooth muscle;Actin, aortic smooth muscle	HQGVMVGMGQK(1)DSYVGDEAQSK(1)R	1;2	50	50;50;50;50;50;50;50;50;50;50;50;50;50;50;52;52;51;52;52;51;51;51;52;52	1	1	1	1	0.936742	0.00676478	-0.711724	0.632175	0.375846	0.525768	-0.0677952	0.579952
P60709;A0A2R8Y793;Q6S8J3;A0A2R8YEA7;P63261;I3L4N8	ACTB;POTEE;ACTG1	Known mitochondrial		Actin, cytoplasmic 1;Actin, cytoplasmic 1, N-terminally processed;POTE ankyrin domain family member E;Actin, cytoplasmic 2;Actin, cytoplasmic 2, N-terminally processed	LCYVALDFEQEMATAASSSSLEK(1)SYELPDGQVITIGNER	1	238	238;222;938;116;238;229	1		1	1			-0.655421	0.162726	0.474877	0.510557	0.017701	0.347099
[truncated: 9,329 more rows]
