# Supplementary material for: USP30 sets a trigger threshold for PINK1–PARKIN amplification of mitochondrial ubiquitylation
Source: Life Sci Alliance. 2020 Jul 7;3(8):e202000768. doi: 10.26508/lsa.202000768 (PMC7362391; doi:10.26508/lsa.202000768)
Supplement: Supplementary file 11 [file LSA-2020-00768_SdataF6.2.xlsx]

## Sheet: 6B
Quantitation pUb below 76kDa (17-76kDa)
	Exp#1:
	17-76Kda
	Image Name	Channel	Name	Signal	Total	Area	Bkgnd.	Type			pUb signal	÷ 100000
SHSY5Y DMSO	0006354_03	800	6	39700	111000	31275	2.27	Signal		SHSY5Y DMSO	39700	0.397
FT385 DMSO	0006354_03	800	5	36400	111000	31275	2.4	Signal		FT385 DMSO	36400	0.364
KO11 DMSO	0006354_03	800	4	25900	103000	31275	2.46	Signal		KO11 DMSO	25900	0.259
SHSY5Y AO	0006354_03	800	3	102000	171000	31275	2.21	Signal		SHSY5Y AO	102000	1.02
FT385 AO	0006354_03	800	2	144000	216000	31275	2.29	Signal		FT385 AO	144000	1.44
KO11 AO	0006354_03	800	1	141000	206000	31275	2.08	Signal		KO11 AO	141000	1.41
	Exp#2:
	17-76Kda
	Image Name	Channel	Name	Signal	Total	Area	Bkgnd.	Type			pUb signal	÷ 100000
SHSY5Y DMSO	0006790_03	800	8	14500	56200	29610	1.41	Signal		SHSY5Y DMSO	14500	0.145
FT385 DMSO	0006790_03	800	7	18500	59700	29610	1.39	Signal		FT385 DMSO	18500	0.185
KO11 DMSO	0006790_03	800	6	18800	60900	29610	1.42	Signal		KO11 DMSO	18800	0.188
KOD DMSO	0006790_03	800	5	19100	66800	29610	1.61	Signal		KOD DMSO	19100	0.191
SHSY5Y AO	0006790_03	800	4	156000	210000	29610	1.83	Signal		SHSY5Y AO	156000	1.56
FT385 AO	0006790_03	800	3	231000	288000	29610	1.91	Signal		FT385 AO	231000	2.31
KO11 AO	0006790_03	800	2	207000	263000	29610	1.91	Signal		KO11 AO	207000	2.07
KOD AO	0006790_03	800	1	229000	278000	29610	1.65	Signal		KOD AO	229000	2.29

## Sheet: 6C
Quantitation pUb full smear (38 kDa-225 kDa)
					225-38kDa
				Image Name	Channel	Name	Signal	Total	Area	Bkgnd.	Type				pUb signal	÷ 10000
	mito fraction	DMSO	SH	0004673_01	800	1	1200	17700	26145	0.63	Signal		DMSO	SH	1200	0.12
			FT	0004673_01	800	2	1460	17500	26145	0.614	Signal			FT	1460	0.146
			KO11	0004673_01	800	3	1250	17400	26145	0.619	Signal			KO11	1250	0.125
		24h AO	SH	0004673_01	800	4	36000	53900	26145	0.682	Signal		24h AO	SH	36000	3.6
			FT	0004673_01	800	5	54400	72700	26145	0.7	Signal			FT	54400	5.44
			KO11	0004673_01	800	6	62500	79900	26145	0.667	Signal			KO11	62500	6.25
Quantitation pUb below 76kDa (38kDa -76kDa)
					76-38kDa
				Image Name	Channel	Name	Signal	Total	Area	Bkgnd.	Type				pUb signal	÷ 10000
	mito fraction	DMSO	SH	0004673_01	800	1	423	8490	12789	0.631	Signal		DMSO	SH	423	0.0423
			FT	0004673_01	800	2	605	8450	12789	0.613	Signal			FT	605	0.0605
			KO11	0004673_01	800	3	569	8440	12789	0.616	Signal			KO11	569	0.0569
		24h AO	SH	0004673_01	800	4	15500	23700	12789	0.637	Signal		24h AO	SH	15500	1.55
			FT	0004673_01	800	5	22200	30500	12789	0.651	Signal			FT	22200	2.22
			KO11	0004673_01	800	6	28700	36900	12789	0.638	Signal			KO11	28700	2.87

## Sheet: 6D
Quantitation pUb full smear (bellow 225 kDa)
	Exp#1:
				Analysis below 225 bands
				Image Name	Channel	Name	Signal	Total	Area	Bkgnd.	Type				pUb signal	÷ 1000
	mito fraction	DMSO	SH-SY5Y	0003241_04	800	1	4160	28600	38192	0.639	Signal		DMSO	SH-SY5Y	4160	4.16
			KOD	0003241_04	800	2	4310	28400	38192	0.631	Signal			KOD	4310	4.31
			KO11	0003241_04	800	3	3840	27800	38192	0.627	Signal			KO11	3840	3.84
		1h AO	SH-SY5Y	0003241_04	800	4	7050	31100	38192	0.631	Signal		1h AO	SH-SY5Y	7050	7.05
			KOD	0003241_04	800	5	10400	34700	38192	0.637	Signal			KOD	10400	10.4
			KO11	0003241_04	800	6	11300	35600	38192	0.638	Signal			KO11	11300	11.3
	Exp#2:
				Below 225kDa											pUb signal	÷ 1000
				Image Name	Channel	Name	Signal	Total	Area	Bkgnd.	Type		DMSO	SH-SY5Y	2590	2.59
	mito fraction	DMSO	SH-SY5Y	0003771_05	800	1	2590	30400	35168	0.79	Signal			KOD	3500	3.5
			KOD	0003771_05	800	2	3500	30900	35168	0.779	Signal			KO11	2380	2.38
			KO11	0003771_05	800	3	2380	29500	35168	0.772	Signal		1h AO	SH-SY5Y	7160	7.16
		1h AO	SH-SY5Y	0003771_05	800	4	7160	34900	33284	0.833	Signal			KOD	8270	8.27
			KOD	0003771_05	800	5	8270	36800	35168	0.81	Signal			KO11	8740	8.74
			KO11	0003771_05	800	6	8740	36000	35168	0.775	Signal
Quantitation Ub-TOM20
	Exp#1:
		Mito Ub-TOM20										Ub-TOM20/TOM20	X1000
		Image Name	Channel	Name	Signal	Total	Area	Bkgnd.	Type		SH 1h OA	0.000529054	0.529054
	SH 1h OA	0003400_01	800	16	78.3	2580	1855	1.35	Signal		KOD 1h OA	0.00555714	5.55714
	KOD 1h OA	0003400_01	800	17	778	3290	1855	1.35	Signal		KO11 1h OA	0.00753333	7.53333
	KO11 1h OA	0003400_01	800	18	1130	3650	1855	1.36	Signal
		Mito TOM20
		Image Name	Channel	Name	Signal	Total	Area	Bkgnd.	Type
	SH 1h OA	0003400_01	800	4	148000	157000	2176	4.49	Signal
	KOD 1h OA	0003400_01	800	5	140000	149000	2176	4.32	Signal
	KO11 1h OA	0003400_01	800	6	150000	159000	2176	4.27	Signal
	Exp#2:
		Mito Ub-TOM20										Ub-TOM20/TOM20	x1000
		Image Name	Channel	Name	Signal	Total	Area	Bkgnd.	Type		SH 1h OA	0.00290076	2.90076
	SH 1h OA	0003775_01	800	6	266	2020	1938	0.904	Signal		KOD 1h OA	0.00843164	8.43164
	KOD 1h OA	0003775_01	800	7	629	2400	1938	0.912	Signal		KO11 1h OA	0.00870027	8.70027
	KO11 1h OA	0003775_01	800	8	656	2420	1938	0.912	Signal
		Mito TOM20
		Image Name	Channel	Name	Signal	Total	Area	Bkgnd.	Type
	SH 1h OA	0003775_01	800	14	91700	95900	1938	2.15	Signal
	KOD 1h OA	0003775_01	800	15	74600	78600	1938	2.05	Signal
	KO11 1h OA	0003775_01	800	16	75400	79200	1938	1.96	Signal
